# Supplementary material for: Chemotherapy Induces Tumor-Associated Macrophages that Aid Adaptive Immune Responses in Ovarian Cancer
Source: Oxford University Press journal article supplement (doi:10.1158/2326-6066.cir-20-0968), 2021-04-10
Supplement: 23266066cir200968-sup-255789_2_supp_6942288_qp0z35.xlsx [file 23266066cir200968-sup-255789_2_supp_6942288_qp0z35.xlsx]

## Sheet: Book3
Antibody	Dilution	Manufacturer	Catalogue Number	Panel
CD3-FITC	1:100	Biolegend	300306	human
CD19-FITC	1:100	Biolegend	363008	human
CD20-FITC	1:100	Biolegend	302304	human
CD56-FITC	1:100	Biolegend	304604	human
CD66b-FITC	1:100	Biolegend	305104	human
HLA-DR BV650	1:100	Biolegend	307650	human
CD45-PerCP	1:100	Biolegend	368606	human
CD16-APC-Cy7	1:100	Biolegend	360710	human
CD14-BV510	1:100	Biolegend	301842	human
Siglec8-FITC	1:100	Miltenyi Biotech	130-098-715	human
CD163-PE	1:100	BD Biosciences	556018	human
CD206-PE	1:100	BD Biosciences	555954	human
CD45-BV785	1:100	Biolegend	103149	mouse
CD11b-BV650	1:100	Biolegend	101239	mouse
F4/80-PE	1:100	Biolegend	123110	mouse
CD206-FITC	1:100	Biolegend	141704	mouse
CD3-PE-Cy7	1:50	Biolegend	100320	mouse
Ly6C-Percp5.5	1:200	Biolegend	128012	mouse
CD4-PE	1:200	Biolegend	116006	mouse
MHCII-APC/CY7	1:200	Biolegend	107628	mouse
CD11b-A780	1:100	eBioscience	47-0112-82	mouse
CD8-APC	1:200	eBioscience	17-0081-83	mouse
CD19-Percp5.5	1:200	eBioscience	45-0193-82	mouse
Ly6G-A700	1:200	eBioscience	56-5931-82	mouse
