# Supplementary material for: Chemotherapy Induces Tumor-Associated Macrophages that Aid Adaptive Immune Responses in Ovarian Cancer
Source: Oxford University Press journal article supplement (doi:10.1158/2326-6066.cir-20-0968), 2021-04-10
Supplement: 23266066cir200968-sup-255789_2_supp_6942290_qp0z35.xlsx [file 23266066cir200968-sup-255789_2_supp_6942290_qp0z35.xlsx]

## Sheet: STable2A
Supplementary Table 2A. GSEA was performed on Gene Pattern using canonical pathways and ranked logFC of all genes in post vs pre. List of significantly enriched canonical pathways (p < 0.05) in post vs pre-chemotherapy, NES > 0 means up in post, NES < 0 means down in post vs pre -chemotherapy.
NAME	SIZE	ES	NES	NOM p-val	FDR q-val
KEGG_RIBOSOME	83	0.487217	2.01573	0	0.22707
REACTOME_PEPTIDE_CHAIN_ELONGATION	81	0.521448	1.98921	0	0.145995
REACTOME_NONSENSE_MEDIATED_DECAY_ENHANCED_BY_THE_EXON_JUNCTION_COMPLEX	102	0.485026	1.96997	0	0.11711
REACTOME_3_UTR_MEDIATED_TRANSLATIONAL_REGULATION	101	0.47929	1.81716	0	0.350467
REACTOME_CTNNB1_PHOSPHORYLATION_CASCADE	15	0.653467	1.77596	0.0137615	0.390962
PID_IL8_CXCR2_PATHWAY	31	0.526866	1.75112	0.0225564	0.398983
SA_PTEN_PATHWAY	17	0.620692	1.73521	0.0247525	0.384382
PID_SMAD2_3PATHWAY	17	0.60169	1.73384	0.032967	0.341034
REACTOME_PIP3_ACTIVATES_AKT_SIGNALING	27	0.574192	1.72136	0.0130719	0.330536
PID_IL8_CXCR1_PATHWAY	24	0.559696	1.70184	0.0231214	0.340959
REACTOME_INFLAMMASOMES	16	0.589371	1.66815	0.0232558	0.380682
REACTOME_FORMATION_OF_THE_TERNARY_COMPLEX_AND_SUBSEQUENTLY_THE_43S_COMPLEX	46	0.463261	1.6648	0	0.353186
REACTOME_PI3K_AKT_ACTIVATION	33	0.490755	1.66233	0.00925926	0.329796
REACTOME_SRP_DEPENDENT_COTRANSLATIONAL_PROTEIN_TARGETING_TO_MEMBRANE	104	0.381544	1.58224	0	0.491118
REACTOME_PI_METABOLISM	40	0.458844	1.57607	0.0227273	0.473889
REACTOME_INFLUENZA_VIRAL_RNA_TRANSCRIPTION_AND_REPLICATION	96	0.405847	1.56682	0	0.471362
BIOCARTA_RARRXR_PATHWAY	15	0.572414	1.5592	0.0462185	0.464721
PID_P38_MKK3_6PATHWAY	25	0.471217	1.49461	0.0613497	0.615088
REACTOME_LIPID_DIGESTION_MOBILIZATION_AND_TRANSPORT	28	0.457035	1.48733	0.0426829	0.603685
PID_MAPK_TRK_PATHWAY	32	0.469618	1.48528	0.042735	0.580783
REACTOME_SYNTHESIS_OF_PIPS_AT_THE_PLASMA_MEMBRANE	25	0.473456	1.47343	0.0363636	0.592402
REACTOME_ACTIVATION_OF_THE_MRNA_UPON_BINDING_OF_THE_CAP_BINDING_COMPLEX_AND_EIFS_AND_SUBSEQUENT_BINDING_TO_43S	54	0.400703	1.46978	0.0307692	0.576886
KEGG_REGULATION_OF_AUTOPHAGY	18	0.530793	1.46358	0.0687831	0.568845
PID_IL6_7_PATHWAY	43	0.418292	1.44802	0.0352941	0.59042
REACTOME_GAB1_SIGNALOSOME	35	0.41224	1.44419	0.0378788	0.579807
REACTOME_TRANSLATION	140	0.367097	1.43396	0	0.586439
REACTOME_NUCLEOTIDE_BINDING_DOMAIN_LEUCINE_RICH_REPEAT_CONTAINING_RECEPTOR_NLR_SIGNALING_PATHWAYS	44	0.415611	1.43019	0.0526316	0.576463
PID_FAS_PATHWAY	35	0.420076	1.39924	0.0661157	0.64646
REACTOME_SYNTHESIS_OF_PIPS_AT_THE_GOLGI_MEMBRANE	15	0.528331	1.39592	0.104478	0.634432
BIOCARTA_HCMV_PATHWAY	17	0.473876	1.39022	0.0874317	0.629577
PID_AR_TF_PATHWAY	44	0.412043	1.38471	0.04	0.627702
REACTOME_TRANSCRIPTIONAL_REGULATION_OF_WHITE_ADIPOCYTE_DIFFERENTIATION	66	0.357665	1.38066	0.0169492	0.620499
REACTOME_IL1_SIGNALING	38	0.406567	1.38017	0.0495049	0.603049
REACTOME_INFLUENZA_LIFE_CYCLE	130	0.319632	1.36945	0	0.615368
PID_VEGFR1_2_PATHWAY	67	0.355531	1.3637	0.0476191	0.616914
REACTOME_MYD88_MAL_CASCADE_INITIATED_ON_PLASMA_MEMBRANE	79	0.344667	1.35574	0.0243902	0.623751
PID_IL4_2PATHWAY	49	0.370175	1.35152	0.0735294	0.620457
REACTOME_G_ALPHA_S_SIGNALLING_EVENTS	48	0.369533	1.33627	0.0875	0.64822
PID_TXA2PATHWAY	49	0.366093	1.32905	0.078125	0.65324
REACTOME_TOLL_RECEPTOR_CASCADES	109	0.329707	1.30893	0.05	0.700141
REACTOME_FORMATION_OF_INCISION_COMPLEX_IN_GG_NER	19	0.43911	1.28814	0.145946	0.751542
SA_B_CELL_RECEPTOR_COMPLEXES	23	0.420356	1.27366	0.137143	0.786276
BIOCARTA_GLEEVEC_PATHWAY	23	0.414007	1.27208	0.138122	0.77295
BIOCARTA_PPARA_PATHWAY	48	0.354867	1.26934	0.149254	0.766231
PID_KIT_PATHWAY	50	0.350437	1.25972	0.161765	0.782162
REACTOME_PTM_GAMMA_CARBOXYLATION_HYPUSINE_FORMATION_AND_ARYLSULFATASE_ACTIVATION	16	0.446819	1.24136	0.203791	0.831064
PID_IFNG_PATHWAY	37	0.368776	1.23738	0.15	0.82908
REACTOME_ACTIVATED_TLR4_SIGNALLING	89	0.311389	1.23378	0.0714286	0.825524
REACTOME_ERK_MAPK_TARGETS	21	0.40125	1.22084	0.217617	0.85636
PID_BCR_5PATHWAY	63	0.320044	1.20795	0.140625	0.887874
KEGG_GLYCEROLIPID_METABOLISM	36	0.357739	1.20734	0.177419	0.87285
BIOCARTA_TOLL_PATHWAY	34	0.368356	1.19957	0.181034	0.883814
PID_PI3KCI_AKT_PATHWAY	33	0.358233	1.19952	0.239316	0.867298
REACTOME_DEADENYLATION_OF_MRNA	18	0.418873	1.19823	0.232673	0.855253
REACTOME_RORA_ACTIVATES_CIRCADIAN_EXPRESSION	22	0.39149	1.1753	0.237838	0.927763
PID_IL3_PATHWAY	24	0.384606	1.17035	0.2	0.930194
REACTOME_NUCLEAR_EVENTS_KINASE_AND_TRANSCRIPTION_FACTOR_ACTIVATION	24	0.385069	1.16574	0.239264	0.93311
BIOCARTA_EPO_PATHWAY	18	0.400534	1.14169	0.292929	1
BIOCARTA_INTEGRIN_PATHWAY	35	0.34525	1.13449	0.245763	1
REACTOME_GROWTH_HORMONE_RECEPTOR_SIGNALING	19	0.399949	1.12515	0.28	1
PID_TNF_PATHWAY	45	0.313121	1.12409	0.253165	1
PID_GMCSF_PATHWAY	35	0.332885	1.12352	0.243243	1
REACTOME_INNATE_IMMUNE_SYSTEM	195	0.267836	1.12328	0.333333	1
BIOCARTA_HDAC_PATHWAY	25	0.359993	1.1192	0.266234	1
REACTOME_MAPK_TARGETS_NUCLEAR_EVENTS_MEDIATED_BY_MAP_KINASES	30	0.362841	1.1183	0.293233	0.998867
REACTOME_TRAF6_MEDIATED_INDUCTION_OF_NFKB_AND_MAP_KINASES_UPON_TLR7_8_OR_9_ACTIVATION	72	0.301472	1.11276	0.219512	1
KEGG_TYPE_II_DIABETES_MELLITUS	33	0.343085	1.1048	0.25	1
BIOCARTA_CREB_PATHWAY	23	0.344302	1.08808	0.320988	1
PID_ANGIOPOIETIN_RECEPTOR_PATHWAY	42	0.318575	1.08489	0.360465	1
KEGG_PENTOSE_PHOSPHATE_PATHWAY	23	0.358096	1.08291	0.351724	1
PID_ALK1_PATHWAY	23	0.345084	1.07755	0.333333	1
REACTOME_MRNA_3_END_PROCESSING	33	0.319151	1.06104	0.333333	1
REACTOME_MAP_KINASE_ACTIVATION_IN_TLR_CASCADE	49	0.290239	1.05991	0.325581	1
PID_CMYB_PATHWAY	72	0.278651	1.05086	0.382979	1
REACTOME_G_BETA_GAMMA_SIGNALLING_THROUGH_PI3KGAMMA	17	0.384691	1.04129	0.42233	1
REACTOME_RESPONSE_TO_ELEVATED_PLATELET_CYTOSOLIC_CA2_	61	0.277932	1.04099	0.395833	1
KEGG_DRUG_METABOLISM_OTHER_ENZYMES	21	0.353198	1.02441	0.411429	1
REACTOME_G_PROTEIN_BETA_GAMMA_SIGNALLING	20	0.355404	1.02212	0.392857	1
REACTOME_PKB_MEDIATED_EVENTS	26	0.327657	1.02002	0.355072	1
BIOCARTA_PGC1A_PATHWAY	17	0.358579	1.01636	0.4	1
REACTOME_DOWNREGULATION_OF_SMAD2_3_SMAD4_TRANSCRIPTIONAL_ACTIVITY	19	0.358137	1.0042	0.43956	1
BIOCARTA_AKT_PATHWAY	19	0.345321	1.00297	0.405405	1
KEGG_MTOR_SIGNALING_PATHWAY	44	0.290505	1.0013	0.493827	1
BIOCARTA_CCR5_PATHWAY	16	0.358782	0.999217	0.438914	1
PID_IL1_PATHWAY	34	0.306818	0.995795	0.458647	1
REACTOME_ACTIVATED_TAK1_MEDIATES_P38_MAPK_ACTIVATION	17	0.339834	0.989646	0.448276	1
REACTOME_CREB_PHOSPHORYLATION_THROUGH_THE_ACTIVATION_OF_RAS	18	0.344778	0.989321	0.443182	1
PID_REG_GR_PATHWAY	63	0.279121	0.976643	0.553191	1
BIOCARTA_PTEN_PATHWAY	17	0.343719	0.976423	0.460733	1
BIOCARTA_NTHI_PATHWAY	23	0.324862	0.974791	0.483871	1
REACTOME_PLATELET_HOMEOSTASIS	51	0.270802	0.97138	0.535714	1
REACTOME_NEGATIVE_REGULATORS_OF_RIG_I_MDA5_SIGNALING	30	0.298235	0.970262	0.52349	1
BIOCARTA_TPO_PATHWAY	22	0.320048	0.968884	0.454545	1
BIOCARTA_MITOCHONDRIA_PATHWAY	20	0.329758	0.967091	0.445087	1
PID_EPO_PATHWAY	33	0.291301	0.958312	0.530435	1
PID_THROMBIN_PAR1_PATHWAY	36	0.287241	0.957571	0.518182	1
REACTOME_METABOLISM_OF_RNA	247	0.201191	0.947124	1	1
PID_TRAIL_PATHWAY	27	0.302255	0.94288	0.563291	1
REACTOME_RIG_I_MDA5_MEDIATED_INDUCTION_OF_IFN_ALPHA_BETA_PATHWAYS	58	0.254055	0.935372	0.578125	1
BIOCARTA_MAL_PATHWAY	16	0.337606	0.932602	0.528634	1
REACTOME_NOD1_2_SIGNALING_PATHWAY	29	0.288288	0.930594	0.582781	1
REACTOME_ENERGY_DEPENDENT_REGULATION_OF_MTOR_BY_LKB1_AMPK	15	0.334953	0.923911	0.523585	1
BIOCARTA_MET_PATHWAY	36	0.270094	0.919522	0.570093	1
PID_FCER1_PATHWAY	58	0.244302	0.918534	0.673077	1
REACTOME_DESTABILIZATION_OF_MRNA_BY_KSRP	17	0.322468	0.918231	0.573529	1
PID_CXCR3_PATHWAY	37	0.263913	0.901484	0.630252	1
PID_NOTCH_PATHWAY	47	0.25224	0.897585	0.654762	1
REACTOME_ABC_FAMILY_PROTEINS_MEDIATED_TRANSPORT	21	0.29453	0.896752	0.607955	1
REACTOME_SPHINGOLIPID_DE_NOVO_BIOSYNTHESIS	25	0.29737	0.894884	0.617021	1
BIOCARTA_ERK5_PATHWAY	16	0.314053	0.890625	0.645	1
REACTOME_ENDOSOMAL_SORTING_COMPLEX_REQUIRED_FOR_TRANSPORT_ESCRT	24	0.293243	0.88489	0.619048	1
REACTOME_PRE_NOTCH_PROCESSING_IN_GOLGI	15	0.317382	0.879489	0.619469	1
BIOCARTA_HIVNEF_PATHWAY	56	0.239936	0.878688	0.681159	1
PID_WNT_CANONICAL_PATHWAY	18	0.297152	0.872919	0.641791	1
REACTOME_ANTIGEN_ACTIVATES_B_CELL_RECEPTOR_LEADING_TO_GENERATION_OF_SECOND_MESSENGERS	25	0.289445	0.872381	0.616352	1
REACTOME_INTEGRIN_ALPHAIIB_BETA3_SIGNALING	22	0.288738	0.867701	0.634831	1
BIOCARTA_MEF2D_PATHWAY	18	0.302969	0.865445	0.671362	1
PID_EPHRINB_REV_PATHWAY	24	0.282554	0.864105	0.666667	1
PID_HDAC_CLASSI_PATHWAY	60	0.235165	0.863761	0.795918	1
PID_P38_ALPHA_BETA_PATHWAY	29	0.274664	0.862817	0.669231	1
REACTOME_CIRCADIAN_REPRESSION_OF_EXPRESSION_BY_REV_ERBA	21	0.274884	0.857656	0.657459	1
REACTOME_PLATELET_AGGREGATION_PLUG_FORMATION	22	0.288738	0.855801	0.612022	1
REACTOME_THROMBIN_SIGNALLING_THROUGH_PROTEINASE_ACTIVATED_RECEPTORS_PARS	21	0.280317	0.853138	0.67284	1
PID_HIV_NEF_PATHWAY	33	0.25612	0.852562	0.747748	1
REACTOME_NFKB_AND_MAP_KINASES_ACTIVATION_MEDIATED_BY_TLR4_SIGNALING_REPERTOIRE	69	0.217192	0.849596	0.782609	1
REACTOME_SPHINGOLIPID_METABOLISM	52	0.230722	0.844496	0.75	1
PID_S1P_S1P2_PATHWAY	21	0.277252	0.836688	0.714286	1
REACTOME_BMAL1_CLOCK_NPAS2_ACTIVATES_CIRCADIAN_EXPRESSION	32	0.255636	0.834869	0.722222	1
REACTOME_DARPP_32_EVENTS	22	0.276362	0.832169	0.700637	1
PID_TOLL_ENDOGENOUS_PATHWAY	23	0.276983	0.831897	0.694118	1
KEGG_NEUROTROPHIN_SIGNALING_PATHWAY	106	0.204645	0.831586	0.904762	1
REACTOME_ADP_SIGNALLING_THROUGH_P2RY1	17	0.294308	0.831256	0.665094	1
BIOCARTA_CERAMIDE_PATHWAY	22	0.275019	0.829576	0.754967	1
BIOCARTA_FAS_PATHWAY	29	0.256875	0.827902	0.713376	1
REACTOME_PHOSPHOLIPID_METABOLISM	156	0.204285	0.826442	0.875	1
BIOCARTA_GSK3_PATHWAY	24	0.268158	0.823717	0.726027	1
REACTOME_ACTIVATED_AMPK_STIMULATES_FATTY_ACID_OXIDATION_IN_MUSCLE	15	0.29035	0.823392	0.671429	1
BIOCARTA_DEATH_PATHWAY	31	0.255247	0.821371	0.747899	1
KEGG_APOPTOSIS	77	0.212796	0.82016	0.948718	1
PID_INSULIN_PATHWAY	42	0.230445	0.818744	0.75	1
BIOCARTA_MTOR_PATHWAY	23	0.276272	0.818349	0.74269	1
PID_HEDGEHOG_GLI_PATHWAY	40	0.232455	0.805983	0.831461	1
PID_PI3K_PLC_TRK_PATHWAY	30	0.242364	0.800987	0.791667	1
REACTOME_ACTIVATION_OF_NMDA_RECEPTOR_UPON_GLUTAMATE_BINDING_AND_POSTSYNAPTIC_EVENTS	21	0.277009	0.799122	0.811111	1
KEGG_SPLICEOSOME	124	0.195803	0.798067	0.928571	1
REACTOME_POST_NMDA_RECEPTOR_ACTIVATION_EVENTS	21	0.277009	0.796528	0.727778	1
KEGG_GLYCOSAMINOGLYCAN_BIOSYNTHESIS_CHONDROITIN_SULFATE	19	0.27239	0.794314	0.755102	1
REACTOME_SIGNALING_BY_NOTCH1	58	0.213778	0.786709	0.873016	1
BIOCARTA_NDKDYNAMIN_PATHWAY	17	0.287822	0.782325	0.75	1
BIOCARTA_BCR_PATHWAY	33	0.239062	0.780961	0.8	1
BIOCARTA_NOS1_PATHWAY	16	0.287391	0.780502	0.761905	1
BIOCARTA_IGF1MTOR_PATHWAY	20	0.271768	0.77478	0.777778	1
BIOCARTA_FCER1_PATHWAY	38	0.226845	0.771207	0.864583	1
KEGG_AMYOTROPHIC_LATERAL_SCLEROSIS_ALS	39	0.224712	0.770678	0.858586	1
KEGG_INOSITOL_PHOSPHATE_METABOLISM	46	0.229336	0.769504	0.873418	1
REACTOME_RNA_POL_I_TRANSCRIPTION_TERMINATION	19	0.270477	0.768986	0.798883	1
BIOCARTA_IL6_PATHWAY	22	0.260584	0.767278	0.748571	1
REACTOME_DESTABILIZATION_OF_MRNA_BY_TRISTETRAPROLIN_TTP	16	0.279322	0.761611	0.786046	1
BIOCARTA_VEGF_PATHWAY	29	0.232392	0.760547	0.82069	1
BIOCARTA_GCR_PATHWAY	16	0.273588	0.756534	0.76555	1
BIOCARTA_NO1_PATHWAY	22	0.262083	0.752623	0.815476	1
BIOCARTA_CHEMICAL_PATHWAY	22	0.246408	0.750161	0.830688	1
BIOCARTA_FMLP_PATHWAY	32	0.225082	0.744504	0.894231	1
REACTOME_TRAF6_MEDIATED_IRF7_ACTIVATION	17	0.260154	0.737472	0.812785	1
BIOCARTA_STRESS_PATHWAY	23	0.246758	0.731731	0.855263	1
REACTOME_DESTABILIZATION_OF_MRNA_BY_BRF1	16	0.272893	0.72976	0.813397	1
BIOCARTA_GH_PATHWAY	23	0.243477	0.72877	0.881988	1
REACTOME_INTRINSIC_PATHWAY_FOR_APOPTOSIS	28	0.218774	0.723916	0.870504	1
PID_ANTHRAX_PATHWAY	16	0.259166	0.722679	0.792627	1
REACTOME_ACTIVATED_NOTCH1_TRANSMITS_SIGNAL_TO_THE_NUCLEUS	20	0.246735	0.716837	0.882023	1
BIOCARTA_NFKB_PATHWAY	22	0.240548	0.716214	0.913979	1
REACTOME_SIGNAL_AMPLIFICATION	22	0.235499	0.714507	0.892405	1
REACTOME_FORMATION_OF_TRANSCRIPTION_COUPLED_NER_TC_NER_REPAIR_COMPLEX	26	0.225948	0.714489	0.873239	1
REACTOME_TRIF_MEDIATED_TLR3_SIGNALING	71	0.178294	0.713801	0.97619	1
REACTOME_ACTIVATION_OF_GENES_BY_ATF4	23	0.236489	0.713076	0.870787	1
ST_GRANULE_CELL_SURVIVAL_PATHWAY	24	0.227312	0.709821	0.890411	1
KEGG_UBIQUITIN_MEDIATED_PROTEOLYSIS	128	0.182484	0.707362	1	1
REACTOME_JNK_C_JUN_KINASES_PHOSPHORYLATION_AND_ACTIVATION_MEDIATED_BY_ACTIVATED_HUMAN_TAK1	16	0.256072	0.700946	0.890547	1
REACTOME_PROCESSING_OF_CAPPED_INTRON_CONTAINING_PRE_MRNA	134	0.161149	0.696331	1	1
REACTOME_LATE_PHASE_OF_HIV_LIFE_CYCLE	93	0.177242	0.695678	1	1
REACTOME_NOTCH1_INTRACELLULAR_DOMAIN_REGULATES_TRANSCRIPTION	40	0.209812	0.69473	0.933333	1
BIOCARTA_MAPK_PATHWAY	84	0.181918	0.6896	1	1
REACTOME_SIGNALING_BY_THE_B_CELL_RECEPTOR_BCR	115	0.166949	0.688134	1	1
REACTOME_DEADENYLATION_DEPENDENT_MRNA_DECAY	42	0.203497	0.687415	0.962963	1
REACTOME_RNA_POL_II_TRANSCRIPTION	94	0.167107	0.68465	1	1
REACTOME_MRNA_SPLICING	105	0.167254	0.681368	1	1
REACTOME_RNA_POL_I_TRANSCRIPTION_INITIATION	22	0.228799	0.68069	0.895954	1
REACTOME_MRNA_PROCESSING	150	0.161355	0.675519	1	1
PID_NFKAPPAB_ATYPICAL_PATHWAY	16	0.241967	0.673711	0.887805	1
BIOCARTA_INSULIN_PATHWAY	20	0.234728	0.67284	0.897849	1
SA_CASPASE_CASCADE	17	0.234141	0.666604	0.910798	1
REACTOME_RNA_POL_II_PRE_TRANSCRIPTION_EVENTS	52	0.181601	0.662814	0.96875	1
REACTOME_RNA_POL_II_TRANSCRIPTION_PRE_INITIATION_AND_PROMOTER_OPENING	37	0.193136	0.650421	0.964286	1
KEGG_SELENOAMINO_ACID_METABOLISM	23	0.217094	0.648259	0.926136	1
REACTOME_RNA_POL_III_TRANSCRIPTION_INITIATION_FROM_TYPE_3_PROMOTER	24	0.211588	0.647125	0.933775	1
REACTOME_REGULATION_OF_MRNA_STABILITY_BY_PROTEINS_THAT_BIND_AU_RICH_ELEMENTS	78	0.165456	0.646552	1	1
KEGG_ACUTE_MYELOID_LEUKEMIA	52	0.185407	0.641529	0.969697	1
PID_LKB1_PATHWAY	40	0.19165	0.634627	0.95	1
REACTOME_SIGNALING_BY_FGFR1_FUSION_MUTANTS	18	0.215639	0.629896	0.92823	1
BIOCARTA_TNFR2_PATHWAY	16	0.225836	0.629689	0.934884	1
BIOCARTA_NGF_PATHWAY	16	0.221303	0.618254	0.936937	1
REACTOME_FORMATION_OF_RNA_POL_II_ELONGATION_COMPLEX_	36	0.18137	0.616298	0.981132	1
REACTOME_PERK_REGULATED_GENE_EXPRESSION	26	0.196234	0.61626	0.964539	1
PID_P38_MK2_PATHWAY	19	0.20217	0.615297	0.969849	1
BIOCARTA_IGF1_PATHWAY	21	0.202536	0.600878	0.960199	1
KEGG_RIG_I_LIKE_RECEPTOR_SIGNALING_PATHWAY	51	0.164261	0.599764	1	1
KEGG_SNARE_INTERACTIONS_IN_VESICULAR_TRANSPORT	35	0.178689	0.595445	0.959677	1
REACTOME_CLEAVAGE_OF_GROWING_TRANSCRIPT_IN_THE_TERMINATION_REGION_	42	0.1691	0.594815	1	1
KEGG_GLYCEROPHOSPHOLIPID_METABOLISM	57	0.161997	0.594535	1	1
REACTOME_MRNA_CAPPING	26	0.188413	0.586883	0.993711	1
REACTOME_TRANSPORT_OF_MATURE_TRANSCRIPT_TO_CYTOPLASM	52	0.160096	0.581448	1	1
REACTOME_METABOLISM_OF_NON_CODING_RNA	48	0.166494	0.581436	1	1
PID_CD40_PATHWAY	26	0.177959	0.578107	0.979167	1
KEGG_ETHER_LIPID_METABOLISM	20	0.19246	0.572043	0.981707	1
REACTOME_NEP_NS2_INTERACTS_WITH_THE_CELLULAR_EXPORT_MACHINERY	27	0.176312	0.565646	0.974194	1
REACTOME_FORMATION_OF_THE_HIV1_EARLY_ELONGATION_COMPLEX	26	0.181226	0.56063	0.986014	1
REACTOME_TRANSPORT_OF_RIBONUCLEOPROTEINS_INTO_THE_HOST_NUCLEUS	27	0.176312	0.558506	0.974194	1
REACTOME_RNA_POL_III_TRANSCRIPTION_INITIATION_FROM_TYPE_2_PROMOTER	21	0.181154	0.555492	0.977778	1
BIOCARTA_PML_PATHWAY	15	0.205168	0.553824	0.955445	1
PID_CERAMIDE_PATHWAY	47	0.15866	0.54697	0.984375	1
REACTOME_REGULATION_OF_GLUCOKINASE_BY_GLUCOKINASE_REGULATORY_PROTEIN	25	0.176284	0.543458	0.986667	1
BIOCARTA_BAD_PATHWAY	23	0.173236	0.537959	0.993421	1
REACTOME_TRANSPORT_OF_MATURE_MRNA_DERIVED_FROM_AN_INTRONLESS_TRANSCRIPT	32	0.159841	0.53748	1	1
REACTOME_ANTIVIRAL_MECHANISM_BY_IFN_STIMULATED_GENES	65	0.131957	0.526112	1	1
BIOCARTA_CCR3_PATHWAY	17	0.187768	0.524904	0.985981	1
BIOCARTA_NKCELLS_PATHWAY	15	0.1956	0.521311	0.960526	1
BIOCARTA_SPPA_PATHWAY	19	0.177153	0.517595	0.994505	1
REACTOME_SIGNALING_BY_FGFR1_MUTANTS	19	0.171138	0.499901	0.976879	1
REACTOME_RNA_POL_III_CHAIN_ELONGATION	15	0.181067	0.490993	0.995745	1
BIOCARTA_EIF_PATHWAY	16	0.159638	0.43941	0.995169	1
REACTOME_HIV_LIFE_CYCLE	106	0.106792	0.431264	1	0.998953
REACTOME_METABOLISM_OF_MRNA	202	0.242789			1
REACTOME_CELL_JUNCTION_ORGANIZATION	50	-0.76503	-1.8688	0	0.00170197
REACTOME_CELL_CELL_JUNCTION_ORGANIZATION	31	-0.802807	-1.86229	0	0.00113465
NABA_CORE_MATRISOME	153	-0.684836	-1.7963	0	0.0074429
REACTOME_CELL_CELL_COMMUNICATION	82	-0.70918	-1.79197	0	0.00663971
PID_PLK1_PATHWAY	43	-0.738282	-1.77577	0	0.00850637
NABA_ECM_GLYCOPROTEINS	110	-0.675693	-1.74956	0	0.0183546
PID_A6B1_A6B4_INTEGRIN_PATHWAY	40	-0.739811	-1.73927	0	0.020206
PID_INTEGRIN1_PATHWAY	57	-0.704879	-1.73712	0	0.0189082
KEGG_ECM_RECEPTOR_INTERACTION	64	-0.696859	-1.73374	0	0.0187127
PID_FOXM1_PATHWAY	38	-0.732849	-1.73284	0	0.0173973
REACTOME_SIGNALING_BY_HIPPO	20	-0.79663	-1.73163	0	0.0163742
REACTOME_COLLAGEN_FORMATION	40	-0.737306	-1.72736	0	0.0168127
REACTOME_G2_M_CHECKPOINTS	40	-0.713423	-1.72605	0	0.0162847
REACTOME_NETRIN1_SIGNALING	30	-0.74234	-1.71723	0	0.0193358
KEGG_TIGHT_JUNCTION	89	-0.668523	-1.70666	0	0.021586
REACTOME_ADHERENS_JUNCTIONS_INTERACTIONS	16	-0.822146	-1.70382	0	0.0214683
REACTOME_KINESINS	21	-0.76868	-1.70344	0.00123916	0.0206042
REACTOME_CYCLIN_A_B1_ASSOCIATED_EVENTS_DURING_G2_M_TRANSITION	15	-0.812081	-1.70247	0.0012837	0.0201869
REACTOME_E2F_MEDIATED_REGULATION_OF_DNA_REPLICATION	33	-0.724225	-1.69508	0	0.0223705
REACTOME_MITOTIC_PROMETAPHASE	81	-0.662712	-1.68898	0	0.024311
PID_SYNDECAN_1_PATHWAY	38	-0.723286	-1.68454	0	0.0256758
PID_AURORA_B_PATHWAY	38	-0.704356	-1.67357	0	0.0301373
NABA_COLLAGENS	29	-0.732432	-1.67061	0.00232019	0.0313626
PID_WNT_SIGNALING_PATHWAY	16	-0.79368	-1.65922	0.0012837	0.0377631
REACTOME_EXTRACELLULAR_MATRIX_ORGANIZATION	53	-0.676592	-1.65299	0.00215054	0.0408963
REACTOME_GRB2_EVENTS_IN_ERBB2_SIGNALING	18	-0.774613	-1.65048	0.00247525	0.0410847
REACTOME_G1_S_SPECIFIC_TRANSCRIPTION	17	-0.789482	-1.64965	0	0.040167
REACTOME_ACTIVATION_OF_THE_PRE_REPLICATIVE_COMPLEX	29	-0.705172	-1.63564	0.00463499	0.0509596
REACTOME_G0_AND_EARLY_G1	23	-0.735416	-1.63031	0.00363636	0.0540813
BIOCARTA_HER2_PATHWAY	22	-0.755575	-1.62818	0	0.0546145
REACTOME_TIGHT_JUNCTION_INTERACTIONS	15	-0.800891	-1.62672	0.00131234	0.0544242
REACTOME_DNA_REPLICATION	180	-0.612655	-1.61973	0	0.059421
REACTOME_AXON_GUIDANCE	191	-0.612517	-1.61888	0	0.0585228
REACTOME_DNA_STRAND_ELONGATION	30	-0.696018	-1.6075	0.00688863	0.0693687
REACTOME_MITOTIC_M_M_G1_PHASES	160	-0.61643	-1.60621	0	0.0690475
REACTOME_ACTIVATION_OF_ATR_IN_RESPONSE_TO_REPLICATION_STRESS	34	-0.680633	-1.596	0.00342075	0.0801094
REACTOME_NEGATIVE_REGULATION_OF_FGFR_SIGNALING	17	-0.75563	-1.58938	0.00868486	0.0870141
KEGG_ARRHYTHMOGENIC_RIGHT_VENTRICULAR_CARDIOMYOPATHY_ARVC	50	-0.646157	-1.586	0.00107643	0.0898483
KEGG_CELL_CYCLE	120	-0.616025	-1.58464	0	0.0896229
NABA_BASEMENT_MEMBRANES	30	-0.679754	-1.5842	0.00458716	0.0879757
PID_ECADHERIN_STABILIZATION_PATHWAY	38	-0.660733	-1.58143	0.00903955	0.0892782
KEGG_ARGININE_AND_PROLINE_METABOLISM	37	-0.672937	-1.57861	0.00451977	0.0908062
REACTOME_L1CAM_INTERACTIONS	65	-0.626024	-1.56964	0.00318134	0.101432
REACTOME_G1_S_TRANSITION	104	-0.609714	-1.56955	0	0.0993492
KEGG_CELL_ADHESION_MOLECULES_CAMS	97	-0.611106	-1.56839	0	0.0990059
PID_INTEGRIN3_PATHWAY	33	-0.673216	-1.55576	0.00792752	0.11705
KEGG_HYPERTROPHIC_CARDIOMYOPATHY_HCM	57	-0.633648	-1.55337	0.00105932	0.118473
NABA_MATRISOME	474	-0.580936	-1.54695	0	0.126914
BIOCARTA_MCM_PATHWAY	18	-0.717193	-1.54525	0.0294118	0.127436
REACTOME_S_PHASE	104	-0.601108	-1.54511	0.00101626	0.125238
REACTOME_APC_CDC20_MEDIATED_DEGRADATION_OF_NEK2A	21	-0.691692	-1.54241	0.0179641	0.127545
REACTOME_M_G1_TRANSITION	75	-0.599085	-1.53975	0.00206398	0.129679
REACTOME_MITOTIC_G1_G1_S_PHASES	128	-0.590742	-1.53776	0	0.130541
REACTOME_MEIOTIC_RECOMBINATION	45	-0.635117	-1.5367	0.00769231	0.129896
PID_ATR_PATHWAY	36	-0.652342	-1.52692	0.0191657	0.14591
PID_HEDGEHOG_2PATHWAY	15	-0.739889	-1.52417	0.0208062	0.148935
REACTOME_YAP1_AND_WWTR1_TAZ_STIMULATED_GENE_EXPRESSION	20	-0.707317	-1.52293	0.0185414	0.148684
PID_ARF6_TRAFFICKING_PATHWAY	43	-0.639135	-1.52199	0.00985761	0.147968
REACTOME_CELL_CYCLE_MITOTIC	298	-0.577863	-1.52108	0	0.147273
PID_AVB3_INTEGRIN_PATHWAY	63	-0.617295	-1.52101	0.0116525	0.14497
REACTOME_SEMA4D_INDUCED_CELL_MIGRATION_AND_GROWTH_CONE_COLLAPSE	24	-0.673996	-1.51567	0.0207317	0.153086
KEGG_SYSTEMIC_LUPUS_ERYTHEMATOSUS	74	-0.603166	-1.51405	0.0031185	0.153896
KEGG_GLYCINE_SERINE_AND_THREONINE_METABOLISM	18	-0.694497	-1.5137	0.0282776	0.152248
REACTOME_TELOMERE_MAINTENANCE	52	-0.611649	-1.50931	0.00955414	0.15913
REACTOME_SEMA4D_IN_SEMAPHORIN_SIGNALING	29	-0.652203	-1.50844	0.0183908	0.158334
KEGG_AXON_GUIDANCE	97	-0.584249	-1.50548	0.00307377	0.161864
REACTOME_SIGNALING_BY_ROBO_RECEPTOR	25	-0.665356	-1.50525	0.0238949	0.159972
REACTOME_SYNTHESIS_OF_DNA	88	-0.5874	-1.50386	0.00209205	0.160426
REACTOME_CELL_CYCLE	360	-0.56041	-1.49637	0	0.173427
KEGG_DNA_REPLICATION	35	-0.631555	-1.4942	0.0281215	0.175515
KEGG_COMPLEMENT_AND_COAGULATION_CASCADES	39	-0.627135	-1.48954	0.0187638	0.182932
REACTOME_PI3K_EVENTS_IN_ERBB2_SIGNALING	38	-0.618704	-1.48934	0.0232044	0.180998
REACTOME_A_TETRASACCHARIDE_LINKER_SEQUENCE_IS_REQUIRED_FOR_GAG_SYNTHESIS	19	-0.691957	-1.48729	0.0322181	0.182795
REACTOME_COMPLEMENT_CASCADE	17	-0.699603	-1.48077	0.0391414	0.194842
REACTOME_DEPOSITION_OF_NEW_CENPA_CONTAINING_NUCLEOSOMES_AT_THE_CENTROMERE	40	-0.627054	-1.48019	0.0294438	0.193354
BIOCARTA_G2_PATHWAY	23	-0.66947	-1.47874	0.032413	0.194013
REACTOME_FRS2_MEDIATED_CASCADE	17	-0.693344	-1.47404	0.0519159	0.202294
KEGG_FOCAL_ADHESION	167	-0.561044	-1.46883	0	0.211588
BIOCARTA_CELLCYCLE_PATHWAY	23	-0.661791	-1.46824	0.0343602	0.210261
REACTOME_EXTENSION_OF_TELOMERES	26	-0.651801	-1.46806	0.0407451	0.208168
REACTOME_CHOLESTEROL_BIOSYNTHESIS	20	-0.66417	-1.46457	0.0506798	0.214017
REACTOME_INTEGRIN_CELL_SURFACE_INTERACTIONS	67	-0.57986	-1.45939	0.012685	0.224506
PID_BMP_PATHWAY	33	-0.62062	-1.4591	0.0403691	0.222554
REACTOME_APOPTOTIC_CLEAVAGE_OF_CELLULAR_PROTEINS	30	-0.62197	-1.45799	0.0359212	0.222487
NABA_ECM_REGULATORS	114	-0.563008	-1.45651	0.0040568	0.223691
KEGG_ADHERENS_JUNCTION	64	-0.58641	-1.45621	0.0233051	0.221805
REACTOME_CHROMOSOME_MAINTENANCE	89	-0.574736	-1.45455	0.00309917	0.223188
BIOCARTA_G1_PATHWAY	28	-0.643504	-1.45236	0.0395349	0.225902
KEGG_TGF_BETA_SIGNALING_PATHWAY	64	-0.577145	-1.44046	0.0262329	0.254402
BIOCARTA_CTLA4_PATHWAY	16	-0.705428	-1.44026	0.0465718	0.252102
REACTOME_SHC1_EVENTS_IN_ERBB4_SIGNALING	17	-0.689333	-1.4394	0.0535492	0.251675
PID_P73PATHWAY	69	-0.57081	-1.43913	0.0167189	0.249813
KEGG_OOCYTE_MEIOSIS	89	-0.558796	-1.43804	0.00728408	0.250079
REACTOME_RNA_POL_I_PROMOTER_OPENING	27	-0.63775	-1.43562	0.0415677	0.253813
KEGG_ALANINE_ASPARTATE_AND_GLUTAMATE_METABOLISM	23	-0.649436	-1.4351	0.0484061	0.252864
PID_E2F_PATHWAY	70	-0.565586	-1.42974	0.0137712	0.263719
KEGG_DILATED_CARDIOMYOPATHY	60	-0.581167	-1.42952	0.0209205	0.261705
PID_ALPHA_SYNUCLEIN_PATHWAY	29	-0.620745	-1.42887	0.0513699	0.260767
REACTOME_PHOSPHORYLATION_OF_THE_APC_C	17	-0.669191	-1.42694	0.0604192	0.262817
PID_FRA_PATHWAY	35	-0.601992	-1.42169	0.046538	0.27351
REACTOME_APC_C_CDC20_MEDIATED_DEGRADATION_OF_CYCLIN_B	19	-0.66739	-1.42144	0.0653846	0.271504
PID_UPA_UPAR_PATHWAY	31	-0.607994	-1.41413	0.0564706	0.288427
PID_WNT_NONCANONICAL_PATHWAY	31	-0.602587	-1.41094	0.0637088	0.294861
REACTOME_LAGGING_STRAND_SYNTHESIS	19	-0.653992	-1.41052	0.0618812	0.293242
REACTOME_CELL_CYCLE_CHECKPOINTS	108	-0.550124	-1.41009	0.0121951	0.291728
REACTOME_SEMAPHORIN_INTERACTIONS	59	-0.565052	-1.40928	0.0274262	0.291092
REACTOME_PROCESSIVE_SYNTHESIS_ON_THE_LAGGING_STRAND	15	-0.681234	-1.40475	0.0785071	0.301072
KEGG_BLADDER_CANCER	37	-0.600621	-1.40291	0.0553672	0.303419
BIOCARTA_ALK_PATHWAY	25	-0.622484	-1.40115	0.0586124	0.305764
REACTOME_INHIBITION_OF_THE_PROTEOLYTIC_ACTIVITY_OF_APC_C_REQUIRED_FOR_THE_ONSET_OF_ANAPHASE_BY_MITOTIC_SPINDLE_CHECKPOINT_COMPONENTS	18	-0.652029	-1.39866	0.0866337	0.310684
PID_AJDISS_2PATHWAY	41	-0.58366	-1.39336	0.0528634	0.323829
REACTOME_MEIOSIS	68	-0.560422	-1.38923	0.0341969	0.333652
REACTOME_ASSEMBLY_OF_THE_PRE_REPLICATIVE_COMPLEX	61	-0.558798	-1.38569	0.0352564	0.341419
REACTOME_PACKAGING_OF_TELOMERE_ENDS	26	-0.607903	-1.382	0.0751445	0.350494
KEGG_BASAL_CELL_CARCINOMA	27	-0.607407	-1.38102	0.077278	0.350663
PID_FGF_PATHWAY	39	-0.579329	-1.38066	0.0553047	0.348698
REACTOME_INSULIN_RECEPTOR_RECYCLING	18	-0.636118	-1.37968	0.100372	0.348441
PID_BARD1_PATHWAY	29	-0.608524	-1.37949	0.0715123	0.346193
REACTOME_NUCLEAR_SIGNALING_BY_ERBB4	27	-0.608412	-1.37906	0.081464	0.344551
KEGG_BIOSYNTHESIS_OF_UNSATURATED_FATTY_ACIDS	18	-0.64163	-1.36777	0.0867971	0.377401
REACTOME_HS_GAG_DEGRADATION	17	-0.642562	-1.36444	0.11344	0.384982
REACTOME_APOPTOTIC_EXECUTION_PHASE	44	-0.565508	-1.36056	0.0733549	0.394668
PID_GLYPICAN_1PATHWAY	22	-0.622355	-1.35876	0.0796671	0.397323
NABA_MATRISOME_ASSOCIATED	321	-0.512848	-1.35801	0	0.396683
PID_NETRIN_PATHWAY	29	-0.588155	-1.35478	0.088812	0.404814
KEGG_HOMOLOGOUS_RECOMBINATION	27	-0.598725	-1.3534	0.101058	0.406236
REACTOME_METABOLISM_OF_AMINO_ACIDS_AND_DERIVATIVES	138	-0.518117	-1.35299	0.0140845	0.404444
KEGG_PATHWAYS_IN_CANCER	253	-0.51011	-1.34597	0.003	0.425328
PID_EPHA2_FWD_PATHWAY	19	-0.614633	-1.3458	0.117573	0.422732
REACTOME_AMYLOIDS	35	-0.570481	-1.34395	0.094186	0.426241
REACTOME_GLYCOSAMINOGLYCAN_METABOLISM	79	-0.522682	-1.34362	0.0540541	0.424289
PID_TAP63_PATHWAY	47	-0.555104	-1.34233	0.0620915	0.425951
PID_AURORA_A_PATHWAY	29	-0.586649	-1.34052	0.100811	0.428976
KEGG_PROGESTERONE_MEDIATED_OOCYTE_MATURATION	73	-0.531064	-1.33912	0.0521921	0.430824
PID_INTEGRIN_CS_PATHWAY	24	-0.60155	-1.33607	0.117503	0.43774
REACTOME_ORC1_REMOVAL_FROM_CHROMATIN	63	-0.531346	-1.33368	0.0703625	0.442713
KEGG_SMALL_CELL_LUNG_CANCER	75	-0.528452	-1.33302	0.059375	0.441852
PID_ECADHERIN_NASCENT_AJ_PATHWAY	39	-0.56238	-1.33077	0.0955556	0.446412
REACTOME_MEIOTIC_SYNAPSIS	44	-0.554257	-1.32945	0.0849673	0.447985
REACTOME_HEPARAN_SULFATE_HEPARIN_HS_GAG_METABOLISM	37	-0.566006	-1.32814	0.0975336	0.449675
REACTOME_MITOTIC_G2_G2_M_PHASES	76	-0.523171	-1.32706	0.0557276	0.450292
KEGG_HEDGEHOG_SIGNALING_PATHWAY	28	-0.588207	-1.3209	0.106682	0.46898
KEGG_REGULATION_OF_ACTIN_CYTOSKELETON	157	-0.505408	-1.3181	0.0190572	0.476053
REACTOME_DEVELOPMENTAL_BIOLOGY	289	-0.500127	-1.31719	0.002	0.476062
REACTOME_SIGNALING_BY_ERBB2	85	-0.517999	-1.31591	0.0529046	0.477188
REACTOME_METAL_ION_SLC_TRANSPORTERS	16	-0.61787	-1.31376	0.138284	0.481821
WNT_SIGNALING	61	-0.526776	-1.31322	0.0810526	0.480392
PID_EPHA_FWDPATHWAY	22	-0.589286	-1.31318	0.131108	0.477306
REACTOME_HS_GAG_BIOSYNTHESIS	21	-0.603751	-1.31143	0.121771	0.480492
REACTOME_MYOGENESIS	19	-0.603048	-1.30796	0.151961	0.489967
REACTOME_REGULATION_OF_MITOTIC_CELL_CYCLE	75	-0.513521	-1.30668	0.0879237	0.491165
BIOCARTA_MYOSIN_PATHWAY	26	-0.571903	-1.30098	0.137441	0.509059
REACTOME_CHONDROITIN_SULFATE_DERMATAN_SULFATE_METABOLISM	38	-0.549209	-1.29604	0.134831	0.524781
PID_NEPHRIN_NEPH1_PATHWAY	28	-0.561762	-1.29344	0.147636	0.531498
NABA_SECRETED_FACTORS	122	-0.495499	-1.29058	0.057634	0.539314
PID_MYC_ACTIV_PATHWAY	74	-0.511913	-1.28936	0.0910995	0.540576
REACTOME_TRANSPORT_OF_INORGANIC_CATIONS_ANIONS_AND_AMINO_ACIDS_OLIGOPEPTIDES	46	-0.53184	-1.28348	0.13311	0.560068
REACTOME_MHC_CLASS_II_ANTIGEN_PRESENTATION	83	-0.501738	-1.2825	0.0772443	0.560285
REACTOME_BASIGIN_INTERACTIONS	19	-0.593401	-1.28182	0.167488	0.559432
REACTOME_CYCLIN_E_ASSOCIATED_EVENTS_DURING_G1_S_TRANSITION_	61	-0.517028	-1.27977	0.118717	0.563915
ST_G_ALPHA_I_PATHWAY	28	-0.564981	-1.27966	0.156431	0.56088
REACTOME_IRON_UPTAKE_AND_TRANSPORT	30	-0.55527	-1.27901	0.16088	0.559876
KEGG_ONE_CARBON_POOL_BY_FOLATE	15	-0.613559	-1.27882	0.187817	0.557251
REACTOME_SIGNALING_BY_FGFR_MUTANTS	26	-0.566327	-1.27623	0.142174	0.56342
REACTOME_SIGNAL_TRANSDUCTION_BY_L1	31	-0.548167	-1.27351	0.159954	0.570387
REACTOME_PHOSPHOLIPASE_C_MEDIATED_CASCADE	26	-0.578038	-1.27259	0.148019	0.570334
REACTOME_CDT1_ASSOCIATION_WITH_THE_CDC6_ORC_ORIGIN_COMPLEX	52	-0.521866	-1.27052	0.132465	0.574866
PID_PRL_SIGNALING_EVENTS_PATHWAY	22	-0.571343	-1.2705	0.154118	0.571515
ST_GA12_PATHWAY	20	-0.589289	-1.26925	0.159148	0.572882
REACTOME_KERATAN_SULFATE_BIOSYNTHESIS	17	-0.592207	-1.26867	0.179067	0.571779
REACTOME_AMINO_ACID_AND_OLIGOPEPTIDE_SLC_TRANSPORTERS	25	-0.565975	-1.26385	0.180505	0.586915
SIG_REGULATION_OF_THE_ACTIN_CYTOSKELETON_BY_RHO_GTPASES	26	-0.559751	-1.26236	0.159674	0.589032
NABA_ECM_AFFILIATED	85	-0.491692	-1.25715	0.109959	0.605941
REACTOME_HOMOLOGOUS_RECOMBINATION_REPAIR_OF_REPLICATION_INDEPENDENT_DOUBLE_STRAND_BREAKS	16	-0.591217	-1.25566	0.194409	0.608344
REACTOME_AMINO_ACID_TRANSPORT_ACROSS_THE_PLASMA_MEMBRANE	19	-0.573472	-1.25189	0.191439	0.619634
ST_FAS_SIGNALING_PATHWAY	60	-0.506095	-1.24985	0.126203	0.624468
PID_DELTA_NP63_PATHWAY	37	-0.533415	-1.24936	0.157603	0.622865
KEGG_PRIMARY_IMMUNODEFICIENCY	24	-0.56734	-1.2492	0.192575	0.619961
REACTOME_APC_C_CDC20_MEDIATED_DEGRADATION_OF_MITOTIC_PROTEINS	63	-0.494495	-1.24382	0.138478	0.637715
REACTOME_SIGNALING_BY_ERBB4	75	-0.490461	-1.24303	0.143757	0.637264
SIG_PIP3_SIGNALING_IN_CARDIAC_MYOCTES	59	-0.502519	-1.24048	0.134454	0.64388
REACTOME_SIGNALING_BY_BMP	19	-0.57431	-1.23987	0.18929	0.642858
REACTOME_NRAGE_SIGNALS_DEATH_THROUGH_JNK	35	-0.520044	-1.23709	0.204646	0.650173
REACTOME_LATENT_INFECTION_OF_HOMO_SAPIENS_WITH_MYCOBACTERIUM_TUBERCULOSIS	24	-0.554065	-1.23638	0.204573	0.649589
KEGG_P53_SIGNALING_PATHWAY	63	-0.496515	-1.23612	0.157563	0.647277
REACTOME_KERATAN_SULFATE_KERATIN_METABOLISM	21	-0.574639	-1.23561	0.200489	0.645874
REACTOME_TRANSPORT_OF_GLUCOSE_AND_OTHER_SUGARS_BILE_SALTS_AND_ORGANIC_ACIDS_METAL_IONS_AND_AMINE_COMPOUNDS	43	-0.50951	-1.23549	0.157895	0.642925
KEGG_CYTOKINE_CYTOKINE_RECEPTOR_INTERACTION	152	-0.472114	-1.23478	0.0734406	0.642151
REACTOME_P53_INDEPENDENT_G1_S_DNA_DAMAGE_CHECKPOINT	46	-0.501933	-1.23426	0.174292	0.640866
REACTOME_NEF_MEDIATES_DOWN_MODULATION_OF_CELL_SURFACE_RECEPTORS_BY_RECRUITING_THEM_TO_CLATHRIN_ADAPTERS	20	-0.566962	-1.23313	0.220732	0.641833
ST_INTEGRIN_SIGNALING_PATHWAY	73	-0.489644	-1.23264	0.142412	0.640586
KEGG_MELANOMA	49	-0.500488	-1.23178	0.175573	0.640887
PID_INTEGRIN_A9B1_PATHWAY	20	-0.56801	-1.23169	0.218868	0.637964
PID_NECTIN_PATHWAY	30	-0.532846	-1.22717	0.206257	0.652705
REACTOME_REGULATION_OF_INSULIN_SECRETION	50	-0.502812	-1.22695	0.176282	0.650301
REACTOME_FANCONI_ANEMIA_PATHWAY	18	-0.568183	-1.22647	0.218477	0.649009
PID_SYNDECAN_4_PATHWAY	27	-0.534146	-1.22523	0.212766	0.65075
REACTOME_CROSS_PRESENTATION_OF_SOLUBLE_EXOGENOUS_ANTIGENS_ENDOSOMES	45	-0.50233	-1.22448	0.201306	0.650394
KEGG_PROSTATE_CANCER	78	-0.48042	-1.22329	0.164256	0.651592
BIOCARTA_INFLAM_PATHWAY	15	-0.594168	-1.22173	0.222938	0.65431
REACTOME_ASPARAGINE_N_LINKED_GLYCOSYLATION	76	-0.485634	-1.22162	0.161658	0.651459
BIOCARTA_TEL_PATHWAY	17	-0.572842	-1.21937	0.254088	0.657146
REACTOME_TRANSFERRIN_ENDOCYTOSIS_AND_RECYCLING	20	-0.570049	-1.21855	0.211896	0.657015
REACTOME_NCAM_SIGNALING_FOR_NEURITE_OUT_GROWTH	47	-0.497474	-1.2094	0.194323	0.688338
REACTOME_FACTORS_INVOLVED_IN_MEGAKARYOCYTE_DEVELOPMENT_AND_PLATELET_PRODUCTION	91	-0.473506	-1.20752	0.147456	0.692448
REACTOME_ION_CHANNEL_TRANSPORT	23	-0.542873	-1.20743	0.232446	0.68944
REACTOME_PYRIMIDINE_METABOLISM	19	-0.562527	-1.20559	0.251889	0.693221
KEGG_CALCIUM_SIGNALING_PATHWAY	96	-0.469929	-1.20382	0.162577	0.696834
KEGG_TRYPTOPHAN_METABOLISM	27	-0.527111	-1.20203	0.263593	0.700528
PID_FAK_PATHWAY	56	-0.487707	-1.2018	0.207226	0.698011
KEGG_ARACHIDONIC_ACID_METABOLISM	27	-0.524341	-1.20098	0.234611	0.698056
REACTOME_G1_PHASE	35	-0.514276	-1.20033	0.216648	0.697403
BIOCARTA_PROTEASOME_PATHWAY	27	-0.52709	-1.20002	0.254355	0.695265
PID_ECADHERIN_KERATINOCYTE_PATHWAY	19	-0.558615	-1.19637	0.265509	0.706178
KEGG_NICOTINATE_AND_NICOTINAMIDE_METABOLISM	18	-0.558045	-1.19548	0.271499	0.706252
REACTOME_BIOSYNTHESIS_OF_THE_N_GLYCAN_PRECURSOR_DOLICHOL_LIPID_LINKED_OLIGOSACCHARIDE_LLO_AND_TRANSFER_TO_A_NASCENT_PROTEIN	28	-0.525186	-1.195	0.240283	0.704935
KEGG_OXIDATIVE_PHOSPHORYLATION	101	-0.464319	-1.1937	0.157681	0.706856
BIOCARTA_TGFB_PATHWAY	19	-0.554708	-1.1916	0.27037	0.711722
REACTOME_ION_TRANSPORT_BY_P_TYPE_ATPASES	20	-0.551037	-1.19116	0.256936	0.710231
REACTOME_SIGNALING_BY_PDGF	104	-0.46091	-1.19066	0.179409	0.708851
REACTOME_TRIGLYCERIDE_BIOSYNTHESIS	33	-0.507646	-1.18895	0.237557	0.712367
KEGG_BUTANOATE_METABOLISM	26	-0.527308	-1.18821	0.257449	0.711902
REACTOME_SMOOTH_MUSCLE_CONTRACTION	22	-0.539364	-1.18594	0.265931	0.717251
PID_INTEGRIN_A4B1_PATHWAY	32	-0.50572	-1.18509	0.252874	0.717296
REACTOME_SIGNALING_BY_TGF_BETA_RECEPTOR_COMPLEX	60	-0.477181	-1.18427	0.213757	0.717177
REACTOME_SCF_BETA_TRCP_MEDIATED_DEGRADATION_OF_EMI1	47	-0.486948	-1.18391	0.229759	0.715398
REACTOME_BRANCHED_CHAIN_AMINO_ACID_CATABOLISM	17	-0.560685	-1.18373	0.285194	0.712959
PID_ENDOTHELIN_PATHWAY	51	-0.492096	-1.18182	0.226537	0.717129
REACTOME_GLYCOLYSIS	21	-0.537173	-1.18115	0.257908	0.71638
KEGG_WNT_SIGNALING_PATHWAY	112	-0.458899	-1.17933	0.17998	0.720449
REACTOME_CDK_MEDIATED_PHOSPHORYLATION_AND_REMOVAL_OF_CDC6	44	-0.489596	-1.1788	0.234019	0.719333
BIOCARTA_ATRBRCA_PATHWAY	20	-0.543671	-1.17624	0.291771	0.725944
KEGG_PROTEASOME	40	-0.490103	-1.17593	0.25618	0.723983
REACTOME_NCAM1_INTERACTIONS	23	-0.53705	-1.17505	0.288235	0.724252
REACTOME_MUSCLE_CONTRACTION	30	-0.515979	-1.17384	0.24826	0.725843
KEGG_PANCREATIC_CANCER	65	-0.467545	-1.1736	0.242781	0.723621
PID_CD8_TCR_PATHWAY	47	-0.484787	-1.17304	0.23727	0.722723
REACTOME_SLC_MEDIATED_TRANSMEMBRANE_TRANSPORT	137	-0.450482	-1.17286	0.170707	0.720335
REACTOME_METABOLISM_OF_VITAMINS_AND_COFACTORS	47	-0.486634	-1.17253	0.239297	0.718561
REACTOME_RECYCLING_PATHWAY_OF_L1	25	-0.52665	-1.17088	0.266258	0.721622
PID_ERBB2_ERBB3_PATHWAY	41	-0.488692	-1.16794	0.263736	0.729605
REACTOME_APC_C_CDH1_MEDIATED_DEGRADATION_OF_CDC20_AND_OTHER_APC_C_CDH1_TARGETED_PROTEINS_IN_LATE_MITOSIS_EARLY_G1	62	-0.466425	-1.1659	0.242553	0.734194
PID_FANCONI_PATHWAY	42	-0.488091	-1.16403	0.264673	0.738129
REACTOME_CONVERSION_FROM_APC_C_CDC20_TO_APC_C_CDH1_IN_LATE_ANAPHASE	16	-0.55029	-1.16026	0.307787	0.749623
PID_CD8_TCR_DOWNSTREAM_PATHWAY	45	-0.476738	-1.15965	0.273616	0.748804
KEGG_PORPHYRIN_AND_CHLOROPHYLL_METABOLISM	21	-0.523821	-1.15948	0.301337	0.74631
PID_IL2_STAT5_PATHWAY	25	-0.514933	-1.1588	0.303981	0.746017
KEGG_PRION_DISEASES	28	-0.504994	-1.15763	0.280138	0.747418
KEGG_LEUKOCYTE_TRANSENDOTHELIAL_MIGRATION	87	-0.453409	-1.15392	0.248168	0.758278
REACTOME_ACTIVATION_OF_KAINATE_RECEPTORS_UPON_GLUTAMATE_BINDING	19	-0.538611	-1.15391	0.29602	0.755291
PID_BETA_CATENIN_DEG_PATHWAY	16	-0.550862	-1.15183	0.318124	0.759734
BIOCARTA_ERK_PATHWAY	24	-0.517444	-1.14955	0.326651	0.765395
REACTOME_SCFSKP2_MEDIATED_DEGRADATION_OF_P27_P21	52	-0.474687	-1.1479	0.273123	0.768587
PID_BETA_CATENIN_NUC_PATHWAY	56	-0.46295	-1.147	0.273797	0.768944
KEGG_ERBB_SIGNALING_PATHWAY	72	-0.45754	-1.14675	0.264644	0.766854
PID_IL23_PATHWAY	25	-0.508768	-1.1443	0.302491	0.77283
PID_IL12_STAT4_PATHWAY	26	-0.507652	-1.14363	0.298368	0.772359
REACTOME_GENERATION_OF_SECOND_MESSENGER_MOLECULES	23	-0.508716	-1.14126	0.324551	0.778363
REACTOME_TRANSPORT_TO_THE_GOLGI_AND_SUBSEQUENT_MODIFICATION	29	-0.500323	-1.14089	0.294185	0.776733
PID_ERBB4_PATHWAY	31	-0.4977	-1.13918	0.311718	0.780069
REACTOME_GOLGI_ASSOCIATED_VESICLE_BIOGENESIS	49	-0.472387	-1.1353	0.290043	0.791478
KEGG_N_GLYCAN_BIOSYNTHESIS	45	-0.475761	-1.13422	0.294118	0.792484
KEGG_ENDOMETRIAL_CANCER	44	-0.472682	-1.13287	0.297919	0.794668
PID_TELOMERASE_PATHWAY	64	-0.448958	-1.13286	0.294995	0.791702
REACTOME_METABOLISM_OF_CARBOHYDRATES	181	-0.426002	-1.12606	0.205411	0.813564
PID_P38_ALPHA_BETA_DOWNSTREAM_PATHWAY	37	-0.472436	-1.12604	0.313953	0.810558
REACTOME_LYSOSOME_VESICLE_BIOGENESIS	22	-0.506943	-1.12522	0.32638	0.810397
BIOCARTA_PAR1_PATHWAY	31	-0.487948	-1.12423	0.334088	0.810866
KEGG_VIBRIO_CHOLERAE_INFECTION	46	-0.466278	-1.12274	0.328649	0.813378
REACTOME_CELL_DEATH_SIGNALLING_VIA_NRAGE_NRIF_AND_NADE	50	-0.457674	-1.1204	0.318132	0.819122
REACTOME_CLASS_B_2_SECRETIN_FAMILY_RECEPTORS	33	-0.474927	-1.11651	0.345143	0.830646
ST_ADRENERGIC	28	-0.494287	-1.11402	0.361111	0.836886
ST_GAQ_PATHWAY	25	-0.500263	-1.11265	0.339759	0.838653
KEGG_GLUTATHIONE_METABOLISM	40	-0.463784	-1.11116	0.333703	0.841051
PID_NFAT_TFPATHWAY	34	-0.477569	-1.11089	0.348365	0.839
KEGG_PURINE_METABOLISM	121	-0.428325	-1.10793	0.276704	0.846844
KEGG_THYROID_CANCER	24	-0.495117	-1.10607	0.381123	0.850395
PID_CDC42_PATHWAY	65	-0.439965	-1.10555	0.332984	0.84918
REACTOME_PI_3K_CASCADE	35	-0.47168	-1.10397	0.35181	0.851991
REACTOME_TRANS_GOLGI_NETWORK_VESICLE_BUDDING	56	-0.448074	-1.10361	0.345455	0.850244
PID_AMB2_NEUTROPHILS_PATHWAY	34	-0.473431	-1.09951	0.346546	0.862118
REACTOME_NUCLEAR_RECEPTOR_TRANSCRIPTION_PATHWAY	29	-0.485761	-1.0993	0.358621	0.859827
REACTOME_TRANSMEMBRANE_TRANSPORT_OF_SMALL_MOLECULES	237	-0.417151	-1.09881	0.265	0.858368
PID_IL12_2PATHWAY	48	-0.451603	-1.0973	0.343716	0.860657
REACTOME_CTLA4_INHIBITORY_SIGNALING	21	-0.505068	-1.09634	0.382212	0.860996
KEGG_MISMATCH_REPAIR	22	-0.504883	-1.09625	0.365707	0.858317
REACTOME_G_ALPHA1213_SIGNALLING_EVENTS	56	-0.446542	-1.0954	0.361111	0.858447
KEGG_CYTOSOLIC_DNA_SENSING_PATHWAY	40	-0.461718	-1.09515	0.349277	0.856435
KEGG_VIRAL_MYOCARDITIS	54	-0.441339	-1.09483	0.339764	0.85458
REACTOME_INTEGRATION_OF_ENERGY_METABOLISM	70	-0.435514	-1.09285	0.361257	0.858811
REACTOME_SIGNALING_BY_INSULIN_RECEPTOR	76	-0.432597	-1.08916	0.340602	0.869008
ST_T_CELL_SIGNAL_TRANSDUCTION	40	-0.459952	-1.08796	0.358093	0.870395
REACTOME_APOPTOSIS	129	-0.417567	-1.08666	0.332317	0.872266
REACTOME_ER_PHAGOSOME_PATHWAY	55	-0.439195	-1.08568	0.349087	0.872654
KEGG_T_CELL_RECEPTOR_SIGNALING_PATHWAY	90	-0.427123	-1.08471	0.337782	0.873154
REACTOME_O_LINKED_GLYCOSYLATION_OF_MUCINS	26	-0.475016	-1.08446	0.376794	0.871112
PID_LYSOPHOSPHOLIPID_PATHWAY	55	-0.440982	-1.08377	0.3612	0.870631
KEGG_EPITHELIAL_CELL_SIGNALING_IN_HELICOBACTER_PYLORI_INFECTION	59	-0.437199	-1.08298	0.366273	0.870557
REACTOME_CHEMOKINE_RECEPTORS_BIND_CHEMOKINES	29	-0.471954	-1.08068	0.391153	0.875653
KEGG_PYRIMIDINE_METABOLISM	87	-0.421183	-1.08046	0.36037	0.873505
BIOCARTA_CDC42RAC_PATHWAY	16	-0.521294	-1.07769	0.406607	0.880471
REACTOME_INSULIN_SYNTHESIS_AND_PROCESSING	16	-0.513943	-1.07507	0.402329	0.886662
BIOCARTA_ARF_PATHWAY	16	-0.516498	-1.075	0.432225	0.884037
KEGG_VALINE_LEUCINE_AND_ISOLEUCINE_DEGRADATION	43	-0.442267	-1.07331	0.39207	0.887014
PID_HIF1_TFPATHWAY	54	-0.435969	-1.07314	0.38758	0.884655
REACTOME_GLUCONEOGENESIS	24	-0.478028	-1.07301	0.387441	0.882217
KEGG_ALDOSTERONE_REGULATED_SODIUM_REABSORPTION	27	-0.469189	-1.07246	0.404255	0.881204
REACTOME_THE_ROLE_OF_NEF_IN_HIV1_REPLICATION_AND_DISEASE_PATHOGENESIS	27	-0.473523	-1.07232	0.421302	0.878852
PID_HIF1A_PATHWAY	18	-0.496604	-1.07227	0.404439	0.876177
REACTOME_REGULATION_OF_ORNITHINE_DECARBOXYLASE_ODC	45	-0.443285	-1.07122	0.391921	0.876855
REACTOME_COSTIMULATION_BY_THE_CD28_FAMILY	56	-0.432005	-1.06796	0.410148	0.885218
KEGG_NON_SMALL_CELL_LUNG_CANCER	49	-0.439269	-1.06509	0.401766	0.892027
KEGG_GLIOMA	55	-0.429335	-1.06449	0.403888	0.89123
REACTOME_RNA_POL_I_TRANSCRIPTION	50	-0.436386	-1.06355	0.392625	0.891483
BIOCARTA_P53_PATHWAY	16	-0.503397	-1.06257	0.42595	0.892042
REACTOME_IMMUNOREGULATORY_INTERACTIONS_BETWEEN_A_LYMPHOID_AND_A_NON_LYMPHOID_CELL	46	-0.435796	-1.06201	0.419037	0.891003
REACTOME_DOUBLE_STRAND_BREAK_REPAIR	22	-0.490733	-1.06097	0.411765	0.891867
BIOCARTA_RACCYCD_PATHWAY	26	-0.472131	-1.05917	0.428738	0.895057
KEGG_HEMATOPOIETIC_CELL_LINEAGE	60	-0.429352	-1.05406	0.430571	0.909274
PID_RHOA_REG_PATHWAY	39	-0.45016	-1.05358	0.430351	0.9081
REACTOME_SIGNALLING_TO_RAS	24	-0.469368	-1.04911	0.428571	0.920268
REACTOME_POST_TRANSLATIONAL_PROTEIN_MODIFICATION	138	-0.403247	-1.04616	0.402624	0.927116
REACTOME_METABOLISM_OF_NUCLEOTIDES	59	-0.417421	-1.04488	0.427807	0.92847
PID_EPHB_FWD_PATHWAY	36	-0.4438	-1.04107	0.436384	0.93824
KEGG_LYSINE_DEGRADATION	41	-0.431899	-1.04005	0.439646	0.938794
REACTOME_REGULATION_OF_INSULIN_SECRETION_BY_GLUCAGON_LIKE_PEPTIDE1	26	-0.459753	-1.03746	0.45367	0.944471
REACTOME_NEUROTRANSMITTER_RELEASE_CYCLE	15	-0.502424	-1.03707	0.457584	0.942946
REACTOME_PD1_SIGNALING	15	-0.502076	-1.03296	0.467844	0.953907
KEGG_TYROSINE_METABOLISM	22	-0.460985	-1.03054	0.45006	0.959117
BIOCARTA_CSK_PATHWAY	17	-0.499754	-1.02975	0.461055	0.958744
REACTOME_AUTODEGRADATION_OF_THE_E3_UBIQUITIN_LIGASE_COP1	45	-0.418348	-1.02881	0.453846	0.958947
PID_PS1_PATHWAY	39	-0.431128	-1.02822	0.463964	0.958008
REACTOME_RESPIRATORY_ELECTRON_TRANSPORT_ATP_SYNTHESIS_BY_CHEMIOSMOTIC_COUPLING_AND_HEAT_PRODUCTION_BY_UNCOUPLING_PROTEINS_	77	-0.407594	-1.02754	0.470711	0.957257
KEGG_GAP_JUNCTION	65	-0.406421	-1.02735	0.458552	0.954994
REACTOME_TCA_CYCLE_AND_RESPIRATORY_ELECTRON_TRANSPORT	112	-0.391991	-1.0266	0.438775	0.954647
REACTOME_RECRUITMENT_OF_MITOTIC_CENTROSOME_PROTEINS_AND_COMPLEXES	61	-0.415275	-1.02414	0.469841	0.959964
REACTOME_TRAFFICKING_OF_AMPA_RECEPTORS	15	-0.496667	-1.02325	0.478149	0.960156
REACTOME_CELL_SURFACE_INTERACTIONS_AT_THE_VASCULAR_WALL	68	-0.407472	-1.01938	0.466457	0.970163
PID_RB_1PATHWAY	56	-0.412559	-1.01918	0.458911	0.967863
REACTOME_CD28_CO_STIMULATION	29	-0.447941	-1.01887	0.486797	0.966003
KEGG_MELANOGENESIS	62	-0.405465	-1.01873	0.469697	0.963662
BIOCARTA_MCALPAIN_PATHWAY	20	-0.462071	-1.01803	0.473812	0.962978
SIG_INSULIN_RECEPTOR_PATHWAY_IN_CARDIAC_MYOCYTES	45	-0.420804	-1.0139	0.468478	0.973444
REACTOME_POST_TRANSLATIONAL_MODIFICATION_SYNTHESIS_OF_GPI_ANCHORED_PROTEINS	25	-0.450003	-1.01124	0.47852	0.979235
REACTOME_PI3K_EVENTS_IN_ERBB4_SIGNALING	33	-0.430845	-1.00919	0.499431	0.983054
PID_MYC_REPRESS_PATHWAY	56	-0.412097	-1.00884	0.501584	0.981367
KEGG_NEUROACTIVE_LIGAND_RECEPTOR_INTERACTION	81	-0.395327	-1.00825	0.493264	0.980375
KEGG_GLYCOLYSIS_GLUCONEOGENESIS	41	-0.419528	-1.00626	0.492802	0.983695
KEGG_FATTY_ACID_METABOLISM	31	-0.436937	-1.00487	0.508065	0.98521
KEGG_CARDIAC_MUSCLE_CONTRACTION	42	-0.424061	-1.00473	0.501654	0.982859
KEGG_TYPE_I_DIABETES_MELLITUS	29	-0.43145	-1.00385	0.486612	0.982787
REACTOME_DIABETES_PATHWAYS	107	-0.391934	-1.00308	0.517276	0.982262
KEGG_GRAFT_VERSUS_HOST_DISEASE	27	-0.445055	-1.00306	0.497712	0.979542
KEGG_METABOLISM_OF_XENOBIOTICS_BY_CYTOCHROME_P450	23	-0.450758	-1.00008	0.488623	0.985672
REACTOME_FATTY_ACID_TRIACYLGLYCEROL_AND_KETONE_BODY_METABOLISM	145	-0.386075	-0.999323	0.513541	0.985261
KEGG_DRUG_METABOLISM_CYTOCHROME_P450	23	-0.441942	-0.996734	0.494062	0.990301
KEGG_PATHOGENIC_ESCHERICHIA_COLI_INFECTION	45	-0.418106	-0.996274	0.500543	0.988969
REACTOME_RESPIRATORY_ELECTRON_TRANSPORT	62	-0.396731	-0.995103	0.519108	0.989715
REACTOME_PPARA_ACTIVATES_GENE_EXPRESSION	89	-0.395163	-0.994242	0.496894	0.98955
KEGG_GLYCOSAMINOGLYCAN_DEGRADATION	17	-0.467441	-0.993353	0.523869	0.989591
REACTOME_PEPTIDE_LIGAND_BINDING_RECEPTORS	58	-0.402292	-0.992207	0.512247	0.990352
KEGG_ENDOCYTOSIS	160	-0.383102	-0.991069	0.545181	0.990989
REACTOME_PI3K_CASCADE	44	-0.411496	-0.990169	0.534409	0.990872
BIOCARTA_EDG1_PATHWAY	24	-0.442432	-0.987639	0.508939	0.995592
REACTOME_SIGNALING_BY_RHO_GTPASES	95	-0.38889	-0.98742	0.536008	0.993515
REACTOME_PHASE1_FUNCTIONALIZATION_OF_COMPOUNDS	24	-0.436352	-0.982985	0.519856	1
REACTOME_LOSS_OF_NLP_FROM_MITOTIC_CENTROSOMES	55	-0.396688	-0.982363	0.530481	1
REACTOME_METABOLISM_OF_POLYAMINES	15	-0.483554	-0.981991	0.527112	1
REACTOME_PHASE_II_CONJUGATION	35	-0.418424	-0.978503	0.530726	1
PID_SYNDECAN_2_PATHWAY	30	-0.428219	-0.977498	0.541475	1
BIOCARTA_IL12_PATHWAY	15	-0.467742	-0.975781	0.515723	1
REACTOME_GLUCOSE_METABOLISM	53	-0.401927	-0.973965	0.534465	1
REACTOME_INTERFERON_ALPHA_BETA_SIGNALING	48	-0.399337	-0.97272	0.555071	1
REACTOME_RIP_MEDIATED_NFKB_ACTIVATION_VIA_DAI	17	-0.461419	-0.97227	0.533835	1
REACTOME_P75_NTR_RECEPTOR_MEDIATED_SIGNALLING	67	-0.387062	-0.970944	0.540741	1
PID_ARF6_PATHWAY	27	-0.427496	-0.969227	0.537278	1
REACTOME_GPCR_LIGAND_BINDING	139	-0.368831	-0.967971	0.580222	1
BIOCARTA_P53HYPOXIA_PATHWAY	22	-0.434613	-0.966381	0.518742	1
KEGG_RENAL_CELL_CARCINOMA	63	-0.386455	-0.966313	0.572495	1
BIOCARTA_ACTINY_PATHWAY	17	-0.457014	-0.96414	0.545455	1
PID_TGFBR_PATHWAY	52	-0.392459	-0.962284	0.554113	1
REACTOME_ACTIVATION_OF_NF_KAPPAB_IN_B_CELLS	59	-0.384184	-0.961642	0.547872	1
PID_REELIN_PATHWAY	24	-0.426092	-0.961029	0.545564	1
PID_HNF3A_PATHWAY	28	-0.421025	-0.960712	0.54918	1
REACTOME_SMAD2_SMAD3_SMAD4_HETEROTRIMER_REGULATES_TRANSCRIPTION	25	-0.428234	-0.958476	0.548809	1
REACTOME_RESOLUTION_OF_AP_SITES_VIA_THE_MULTIPLE_NUCLEOTIDE_PATCH_REPLACEMENT_PATHWAY	16	-0.458797	-0.95725	0.549677	1
REACTOME_BIOLOGICAL_OXIDATIONS	59	-0.38908	-0.955924	0.565859	1
REACTOME_REGULATION_OF_WATER_BALANCE_BY_RENAL_AQUAPORINS	27	-0.418774	-0.95592	0.559302	1
PID_PTP1B_PATHWAY	41	-0.397544	-0.953712	0.554825	1
KEGG_CHRONIC_MYELOID_LEUKEMIA	69	-0.376084	-0.953161	0.578616	1
REACTOME_DOWNREGULATION_OF_TGF_BETA_RECEPTOR_SIGNALING	21	-0.431383	-0.950411	0.563981	1
PID_RET_PATHWAY	36	-0.401664	-0.95005	0.579067	1
REACTOME_VIF_MEDIATED_DEGRADATION_OF_APOBEC3G	47	-0.392775	-0.947592	0.602397	1
REACTOME_TRANSPORT_OF_VITAMINS_NUCLEOSIDES_AND_RELATED_MOLECULES	20	-0.439113	-0.946803	0.582524	1
PID_AR_PATHWAY	56	-0.384707	-0.946693	0.583422	1
KEGG_VASCULAR_SMOOTH_MUSCLE_CONTRACTION	79	-0.376289	-0.946477	0.59431	1
KEGG_CYSTEINE_AND_METHIONINE_METABOLISM	25	-0.418271	-0.946194	0.572929	1
PID_ERA_GENOMIC_PATHWAY	53	-0.383263	-0.94501	0.582888	1
REACTOME_PURINE_METABOLISM	28	-0.41138	-0.943347	0.580046	1
PID_ARF6_DOWNSTREAM_PATHWAY	15	-0.454857	-0.943051	0.575255	1
KEGG_BASE_EXCISION_REPAIR	33	-0.400086	-0.942723	0.575928	1
REACTOME_P53_DEPENDENT_G1_DNA_DAMAGE_RESPONSE	51	-0.386197	-0.941754	0.597639	1
REACTOME_TRANSMISSION_ACROSS_CHEMICAL_SYNAPSES	95	-0.365323	-0.93832	0.607582	1
REACTOME_SIGNALLING_TO_ERKS	32	-0.401283	-0.937978	0.583815	1
REACTOME_INSULIN_RECEPTOR_SIGNALLING_CASCADE	59	-0.384076	-0.936938	0.628998	1
KEGG_LYSOSOME	111	-0.360012	-0.936875	0.635342	1
REACTOME_REGULATION_OF_APOPTOSIS	52	-0.377951	-0.932609	0.603209	1
REACTOME_SIGNALING_BY_GPCR	284	-0.352578	-0.930679	0.705	1
KEGG_LONG_TERM_DEPRESSION	44	-0.387889	-0.930577	0.614955	1
SIG_CHEMOTAXIS	38	-0.388216	-0.930331	0.603157	1
REACTOME_AQUAPORIN_MEDIATED_TRANSPORT	28	-0.402284	-0.92061	0.601143	1
BIOCARTA_CTCF_PATHWAY	22	-0.414715	-0.920081	0.603842	1
REACTOME_TRNA_AMINOACYLATION	42	-0.38169	-0.917916	0.628445	1
REACTOME_EFFECTS_OF_PIP2_HYDROLYSIS	18	-0.427941	-0.916921	0.608802	1
REACTOME_G_ALPHA_I_SIGNALLING_EVENTS	83	-0.36132	-0.914738	0.656995	1
BIOCARTA_AGR_PATHWAY	26	-0.404647	-0.912617	0.613993	1
PID_AP1_PATHWAY	57	-0.372274	-0.910511	0.648677	1
REACTOME_SHC_RELATED_EVENTS	15	-0.436535	-0.910196	0.618742	1
REACTOME_MEMBRANE_TRAFFICKING	106	-0.356349	-0.90843	0.686415	1
REACTOME_ANTIGEN_PROCESSING_CROSS_PRESENTATION	69	-0.364964	-0.904626	0.680873	1
KEGG_PARKINSONS_DISEASE	99	-0.350104	-0.900136	0.687373	1
PID_ATF2_PATHWAY	51	-0.366207	-0.89758	0.672026	1
REACTOME_SIGNALING_BY_FGFR	81	-0.35603	-0.897477	0.686848	1
ST_WNT_BETA_CATENIN_PATHWAY	26	-0.398695	-0.896364	0.635404	1
REACTOME_SYNTHESIS_OF_GLYCOSYLPHOSPHATIDYLINOSITOL_GPI	16	-0.430168	-0.892903	0.656131	1
REACTOME_HEMOSTASIS	333	-0.3373	-0.892121	0.808	1
REACTOME_BASE_EXCISION_REPAIR	18	-0.415906	-0.888437	0.640297	1
REACTOME_GASTRIN_CREB_SIGNALLING_PATHWAY_VIA_PKC_AND_MAPK	100	-0.345046	-0.887274	0.734216	1
KEGG_CITRATE_CYCLE_TCA_CYCLE	27	-0.388123	-0.887176	0.657471	1
REACTOME_DNA_REPAIR	98	-0.339086	-0.885766	0.710338	1
KEGG_MAPK_SIGNALING_PATHWAY	195	-0.337639	-0.885191	0.770541	1
KEGG_COLORECTAL_CANCER	56	-0.358582	-0.88334	0.700644	1
REACTOME_TCR_SIGNALING	45	-0.365526	-0.88259	0.679914	1
REACTOME_PYRUVATE_METABOLISM_AND_CITRIC_ACID_TCA_CYCLE	39	-0.372479	-0.882406	0.660314	1
BIOCARTA_TFF_PATHWAY	19	-0.409644	-0.88203	0.674593	1
REACTOME_SIGNALING_BY_CONSTITUTIVELY_ACTIVE_EGFR	16	-0.421815	-0.879443	0.646173	1
REACTOME_DESTABILIZATION_OF_MRNA_BY_AUF1_HNRNP_D0	48	-0.35933	-0.87773	0.688792	1
REACTOME_SYNTHESIS_AND_INTERCONVERSION_OF_NUCLEOTIDE_DI_AND_TRIPHOSPHATES	15	-0.424687	-0.876521	0.645078	1
REACTOME_G_ALPHA_Q_SIGNALLING_EVENTS	80	-0.343101	-0.875892	0.711917	1
PID_HIF2PATHWAY	31	-0.380237	-0.87559	0.659478	1
KEGG_GLYCOSAMINOGLYCAN_BIOSYNTHESIS_HEPARAN_SULFATE	18	-0.40813	-0.874854	0.66129	1
REACTOME_GPCR_DOWNSTREAM_SIGNALING	222	-0.329643	-0.874557	0.798799	1
REACTOME_CHONDROITIN_SULFATE_BIOSYNTHESIS	15	-0.424348	-0.87454	0.647583	1
BIOCARTA_ARAP_PATHWAY	16	-0.41684	-0.87311	0.66123	1
BIOCARTA_MPR_PATHWAY	28	-0.385769	-0.872756	0.678613	1
PID_INTEGRIN2_PATHWAY	21	-0.39529	-0.872545	0.655431	1
KEGG_PEROXISOME	69	-0.345824	-0.870529	0.719538	1
REACTOME_DOWNSTREAM_SIGNALING_OF_ACTIVATED_FGFR	70	-0.344902	-0.868073	0.710388	1
REACTOME_NEURONAL_SYSTEM	129	-0.333066	-0.867	0.774619	1
REACTOME_TGF_BETA_RECEPTOR_SIGNALING_ACTIVATES_SMADS	24	-0.388069	-0.864657	0.674501	1
BIOCARTA_IL2RB_PATHWAY	37	-0.366888	-0.864171	0.67713	1
REACTOME_PLC_BETA_MEDIATED_EVENTS	30	-0.37336	-0.862599	0.683353	1
PID_IL27_PATHWAY	19	-0.399442	-0.860978	0.673317	1
REACTOME_DAG_AND_IP3_SIGNALING	23	-0.393146	-0.860877	0.692771	1
PID_IL2_PI3K_PATHWAY	32	-0.366593	-0.859647	0.686007	1
KEGG_PPAR_SIGNALING_PATHWAY	46	-0.355666	-0.859038	0.713496	1
REACTOME_CLASS_A1_RHODOPSIN_LIKE_RECEPTORS	105	-0.335404	-0.858841	0.7737	1
PID_CASPASE_PATHWAY	48	-0.353199	-0.858568	0.708653	1
BIOCARTA_BCELLSURVIVAL_PATHWAY	16	-0.405297	-0.858147	0.6875	1
KEGG_GNRH_SIGNALING_PATHWAY	73	-0.337271	-0.857531	0.746362	1
BIOCARTA_CXCR4_PATHWAY	22	-0.382684	-0.854983	0.685714	1
REACTOME_ADAPTIVE_IMMUNE_SYSTEM	459	-0.320439	-0.854544	0.919	1
BIOCARTA_RAC1_PATHWAY	22	-0.388843	-0.849044	0.688327	1
PID_TCR_PATHWAY	59	-0.346188	-0.845883	0.74709	1
ST_MYOCYTE_AD_PATHWAY	19	-0.398049	-0.845668	0.695921	1
KEGG_AUTOIMMUNE_THYROID_DISEASE	26	-0.373204	-0.845132	0.697216	1
PID_NCADHERIN_PATHWAY	28	-0.374587	-0.844777	0.713134	1
BIOCARTA_LAIR_PATHWAY	15	-0.40384	-0.843391	0.701149	1
KEGG_ALLOGRAFT_REJECTION	25	-0.376135	-0.841763	0.705314	1
SA_MMP_CYTOKINE_CONNECTION	15	-0.412739	-0.841215	0.710459	1
KEGG_GALACTOSE_METABOLISM	21	-0.385967	-0.837763	0.691937	1
REACTOME_HOST_INTERACTIONS_OF_HIV_FACTORS	118	-0.323841	-0.836852	0.802831	1
REACTOME_MITOCHONDRIAL_TRNA_AMINOACYLATION	21	-0.383814	-0.83639	0.7046	1
BIOCARTA_IL7_PATHWAY	17	-0.396817	-0.835281	0.692994	1
REACTOME_TRANSCRIPTION_COUPLED_NER_TC_NER	41	-0.343364	-0.83507	0.737723	1
REACTOME_REGULATION_OF_KIT_SIGNALING	16	-0.398859	-0.834355	0.7	1
KEGG_DORSO_VENTRAL_AXIS_FORMATION	19	-0.389276	-0.832514	0.710234	1
REACTOME_MICRORNA_MIRNA_BIOGENESIS	17	-0.392885	-0.829596	0.71519	1
REACTOME_CITRIC_ACID_CYCLE_TCA_CYCLE	19	-0.384889	-0.826995	0.717791	1
REACTOME_SIGNALING_BY_FGFR_IN_DISEASE	95	-0.321116	-0.826878	0.793489	1
REACTOME_GLUTATHIONE_CONJUGATION	18	-0.388972	-0.826732	0.712102	1
SIG_PIP3_SIGNALING_IN_B_LYMPHOCYTES	32	-0.353473	-0.826697	0.717367	1
KEGG_BETA_ALANINE_METABOLISM	17	-0.390587	-0.826002	0.693267	1
PID_P53_DOWNSTREAM_PATHWAY	118	-0.31954	-0.825136	0.822268	1
PID_ERBB1_RECEPTOR_PROXIMAL_PATHWAY	33	-0.353152	-0.823738	0.731293	1
REACTOME_RNA_POL_I_RNA_POL_III_AND_MITOCHONDRIAL_TRANSCRIPTION	81	-0.326773	-0.823174	0.79171	1
KEGG_PROPANOATE_METABOLISM	28	-0.358389	-0.822714	0.723898	1
REACTOME_METABOLISM_OF_LIPIDS_AND_LIPOPROTEINS	361	-0.308746	-0.822638	0.938	1
REACTOME_GLYCOGEN_BREAKDOWN_GLYCOGENOLYSIS	15	-0.400078	-0.822574	0.731613	1
REACTOME_SULFUR_AMINO_ACID_METABOLISM	20	-0.376113	-0.818827	0.721535	1
KEGG_CHEMOKINE_SIGNALING_PATHWAY	141	-0.31397	-0.818693	0.8429	1
SIG_CD40PATHWAYMAP	33	-0.350136	-0.817551	0.75	1
PID_TCR_CALCIUM_PATHWAY	21	-0.375375	-0.815687	0.73462	1
KEGG_PYRUVATE_METABOLISM	31	-0.352601	-0.815097	0.748874	1
REACTOME_AUTODEGRADATION_OF_CDH1_BY_CDH1_APC_C	55	-0.331118	-0.813894	0.779318	1
BIOCARTA_RHO_PATHWAY	31	-0.352132	-0.813148	0.759907	1
PID_ILK_PATHWAY	44	-0.337446	-0.812767	0.771775	1
BIOCARTA_IL2_PATHWAY	21	-0.373094	-0.808505	0.752086	1
REACTOME_GABA_RECEPTOR_ACTIVATION	24	-0.354815	-0.807133	0.73979	1
BIOCARTA_TCR_PATHWAY	41	-0.33313	-0.806194	0.763333	1
REACTOME_NEUROTRANSMITTER_RECEPTOR_BINDING_AND_DOWNSTREAM_TRANSMISSION_IN_THE_POSTSYNAPTIC_CELL	70	-0.322349	-0.805075	0.789969	1
REACTOME_PEROXISOMAL_LIPID_METABOLISM	20	-0.367672	-0.803807	0.73601	1
BIOCARTA_SPRY_PATHWAY	17	-0.384577	-0.801562	0.734435	1
KEGG_INTESTINAL_IMMUNE_NETWORK_FOR_IGA_PRODUCTION	31	-0.348014	-0.800426	0.759132	1
ST_JNK_MAPK_PATHWAY	37	-0.342464	-0.79972	0.787741	1
REACTOME_EGFR_DOWNREGULATION	22	-0.360823	-0.798452	0.737101	1
REACTOME_CYTOSOLIC_TRNA_AMINOACYLATION	24	-0.350948	-0.790742	0.777648	1
BIOCARTA_IGF1R_PATHWAY	21	-0.364957	-0.789658	0.755151	1
PID_AVB3_OPN_PATHWAY	30	-0.340461	-0.785342	0.786635	1
BIOCARTA_ATM_PATHWAY	19	-0.366419	-0.78527	0.749367	1
KEGG_VEGF_SIGNALING_PATHWAY	59	-0.317896	-0.784219	0.808808	1
PID_HDAC_CLASSIII_PATHWAY	23	-0.351785	-0.782779	0.775388	1
PID_RAS_PATHWAY	27	-0.344711	-0.782126	0.777397	1
PID_LYMPH_ANGIOGENESIS_PATHWAY	23	-0.35183	-0.781836	0.768957	1
BIOCARTA_TID_PATHWAY	17	-0.371813	-0.7817	0.762203	1
BIOCARTA_NKT_PATHWAY	16	-0.370509	-0.78074	0.76646	1
REACTOME_PROLONGED_ERK_ACTIVATION_EVENTS	17	-0.370557	-0.780613	0.747869	1
KEGG_AMINOACYL_TRNA_BIOSYNTHESIS	41	-0.328664	-0.778706	0.806452	1
BIOCARTA_CALCINEURIN_PATHWAY	17	-0.368609	-0.775031	0.775536	1
REACTOME_IL_2_SIGNALING	35	-0.33147	-0.772108	0.8125	1
PID_SMAD2_3NUCLEAR_PATHWAY	69	-0.303766	-0.770697	0.834728	1
BIOCARTA_NFAT_PATHWAY	38	-0.325124	-0.769752	0.791946	1
KEGG_JAK_STAT_SIGNALING_PATHWAY	95	-0.299777	-0.768822	0.879346	1
REACTOME_DOWNSTREAM_SIGNAL_TRANSDUCTION	82	-0.305246	-0.767295	0.864058	1
REACTOME_POTASSIUM_CHANNELS	32	-0.327713	-0.764505	0.812785	1
PID_ER_NONGENOMIC_PATHWAY	37	-0.324397	-0.763724	0.821469	1
PID_TCPTP_PATHWAY	40	-0.321316	-0.763199	0.811594	1
PID_RETINOIC_ACID_PATHWAY	27	-0.335099	-0.761433	0.813843	1
PID_SHP2_PATHWAY	49	-0.310105	-0.76133	0.832069	1
PID_RXR_VDR_PATHWAY	23	-0.33902	-0.76102	0.780073	1
REACTOME_IL_RECEPTOR_SHC_SIGNALING	21	-0.347599	-0.756262	0.793021	1
KEGG_NATURAL_KILLER_CELL_MEDIATED_CYTOTOXICITY	86	-0.300562	-0.755175	0.886948	1
REACTOME_PROTEOLYTIC_CLEAVAGE_OF_SNARE_COMPLEX_PROTEINS	15	-0.355577	-0.745688	0.769728	1
PID_RAC1_PATHWAY	52	-0.304263	-0.743035	0.864776	1
REACTOME_PYRUVATE_METABOLISM	17	-0.344387	-0.742729	0.796415	1
REACTOME_ANTIGEN_PRESENTATION_FOLDING_ASSEMBLY_AND_PEPTIDE_LOADING_OF_CLASS_I_MHC	19	-0.350187	-0.741033	0.805386	1
REACTOME_GLUCAGON_SIGNALING_IN_METABOLIC_REGULATION	20	-0.342384	-0.741032	0.794555	1
BIOCARTA_WNT_PATHWAY	23	-0.335473	-0.740706	0.822542	1
PID_MET_PATHWAY	77	-0.293451	-0.740017	0.87631	1
REACTOME_GABA_B_RECEPTOR_ACTIVATION	21	-0.338011	-0.738124	0.80653	1
PID_S1P_META_PATHWAY	17	-0.350265	-0.736061	0.821745	1
REACTOME_TRANSCRIPTIONAL_ACTIVITY_OF_SMAD2_SMAD3_SMAD4_HETEROTRIMER	36	-0.311595	-0.734006	0.852775	1
REACTOME_PRE_NOTCH_TRANSCRIPTION_AND_TRANSLATION	23	-0.330277	-0.732911	0.808434	1
ST_PHOSPHOINOSITIDE_3_KINASE_PATHWAY	34	-0.312492	-0.731829	0.837315	1
REACTOME_SIGNALING_BY_SCF_KIT	73	-0.285513	-0.727071	0.887397	1
KEGG_GLYCOSYLPHOSPHATIDYLINOSITOL_GPI_ANCHOR_BIOSYNTHESIS	21	-0.329971	-0.721117	0.844282	1
PID_HNF3B_PATHWAY	17	-0.334863	-0.717928	0.821026	1
PID_S1P_S1P1_PATHWAY	19	-0.33595	-0.714674	0.839196	1
REACTOME_GLOBAL_GENOMIC_NER_GG_NER	31	-0.299863	-0.709899	0.84897	1
PID_ATM_PATHWAY	34	-0.297156	-0.70816	0.86317	1
ST_GA13_PATHWAY	32	-0.305056	-0.707089	0.85023	1
REACTOME_SIGNALLING_BY_NGF	184	-0.268689	-0.70645	0.967871	1
BIOCARTA_IL1R_PATHWAY	30	-0.303248	-0.702409	0.870629	1
ST_P38_MAPK_PATHWAY	37	-0.296666	-0.698465	0.869274	1
REACTOME_ARMS_MEDIATED_ACTIVATION	15	-0.331943	-0.698044	0.841146	1
PID_PI3KCI_PATHWAY	45	-0.289167	-0.697994	0.879781	1
KEGG_HISTIDINE_METABOLISM	18	-0.327229	-0.697938	0.840506	1
KEGG_ANTIGEN_PROCESSING_AND_PRESENTATION	54	-0.287232	-0.697186	0.905376	1
REACTOME_REGULATION_OF_SIGNALING_BY_CBL	17	-0.33116	-0.69712	0.851945	1
REACTOME_CD28_DEPENDENT_PI3K_AKT_SIGNALING	19	-0.327478	-0.69583	0.863581	1
REACTOME_GPVI_MEDIATED_ACTIVATION_CASCADE	28	-0.3039	-0.695564	0.881533	1
PID_PDGFRA_PATHWAY	20	-0.32252	-0.693889	0.864469	1
PID_IGF1_PATHWAY	29	-0.300081	-0.692191	0.879725	1
PID_MYC_PATHWAY	25	-0.308515	-0.68929	0.86643	1
REACTOME_LIPOPROTEIN_METABOLISM	17	-0.331481	-0.689176	0.851942	1
REACTOME_NUCLEOTIDE_EXCISION_REPAIR	46	-0.284405	-0.68786	0.907306	1
PID_CXCR4_PATHWAY	93	-0.269042	-0.687232	0.93299	1
BIOCARTA_P38MAPK_PATHWAY	38	-0.28676	-0.685701	0.896667	1
BIOCARTA_GPCR_PATHWAY	31	-0.29558	-0.684523	0.887514	1
REACTOME_FORMATION_OF_TUBULIN_FOLDING_INTERMEDIATES_BY_CCT_TRIC	16	-0.328338	-0.682566	0.871895	1
PID_RHOA_PATHWAY	40	-0.281283	-0.680971	0.886364	1
KEGG_OTHER_GLYCAN_DEGRADATION	15	-0.324931	-0.676733	0.855484	1
KEGG_B_CELL_RECEPTOR_SIGNALING_PATHWAY	68	-0.268257	-0.675218	0.92887	1
BIOCARTA_ETS_PATHWAY	18	-0.312703	-0.671035	0.859173	1
REACTOME_IL_3_5_AND_GM_CSF_SIGNALING	37	-0.285637	-0.66559	0.89879	1
KEGG_ABC_TRANSPORTERS	31	-0.286586	-0.664184	0.891455	1
REACTOME_OXYGEN_DEPENDENT_PROLINE_HYDROXYLATION_OF_HYPOXIA_INDUCIBLE_FACTOR_ALPHA	15	-0.312193	-0.664007	0.852564	1
REACTOME_MRNA_SPLICING_MINOR_PATHWAY	41	-0.283509	-0.661585	0.915743	1
KEGG_NOD_LIKE_RECEPTOR_SIGNALING_PATHWAY	59	-0.265101	-0.661012	0.93133	1
KEGG_RNA_POLYMERASE	28	-0.290236	-0.659057	0.893349	1
REACTOME_INTERFERON_SIGNALING	134	-0.249092	-0.656481	0.970499	1
PID_TRKR_PATHWAY	53	-0.26363	-0.655415	0.92291	1
KEGG_ASTHMA	17	-0.304432	-0.654571	0.896684	1
REACTOME_G_ALPHA_Z_SIGNALLING_EVENTS	27	-0.288637	-0.653923	0.905326	1
KEGG_INSULIN_SIGNALING_PATHWAY	113	-0.253426	-0.651805	0.960285	1
KEGG_TOLL_LIKE_RECEPTOR_SIGNALING_PATHWAY	81	-0.25272	-0.646355	0.94938	1
REACTOME_PLATELET_ACTIVATION_SIGNALING_AND_AGGREGATION	149	-0.247724	-0.644634	0.970677	1
REACTOME_INTERFERON_GAMMA_SIGNALING	53	-0.262256	-0.644404	0.930672	1
KEGG_ALZHEIMERS_DISEASE	135	-0.249556	-0.643326	0.978788	1
ST_B_CELL_ANTIGEN_RECEPTOR	36	-0.274516	-0.641524	0.931034	1
REACTOME_ACTIVATION_OF_BH3_ONLY_PROTEINS	16	-0.302118	-0.641489	0.904282	1
BIOCARTA_AT1R_PATHWAY	30	-0.278097	-0.641231	0.920231	1
BIOCARTA_CHREBP2_PATHWAY	34	-0.270597	-0.640269	0.923251	1
REACTOME_BOTULINUM_NEUROTOXICITY	16	-0.306822	-0.639838	0.889313	1
BIOCARTA_VIP_PATHWAY	23	-0.290466	-0.638575	0.902795	1
REACTOME_MITOCHONDRIAL_PROTEIN_IMPORT	49	-0.261764	-0.633444	0.936695	1
KEGG_SPHINGOLIPID_METABOLISM	31	-0.271643	-0.633189	0.900685	1
SIG_BCR_SIGNALING_PATHWAY	43	-0.262355	-0.632861	0.932671	1
REACTOME_SYNTHESIS_OF_PA	20	-0.290879	-0.626607	0.919708	1
PID_HES_HEY_PATHWAY	38	-0.263076	-0.624162	0.946309	1
REACTOME_RNA_POL_III_TRANSCRIPTION_TERMINATION	17	-0.295631	-0.621945	0.917808	1
KEGG_PROTEIN_EXPORT	23	-0.277074	-0.618344	0.939951	1
PID_NFAT_3PATHWAY	50	-0.248986	-0.616341	0.949891	1
REACTOME_GENERIC_TRANSCRIPTION_PATHWAY	290	-0.231846	-0.616029	0.999	1
REACTOME_REGULATORY_RNA_PATHWAYS	20	-0.282318	-0.614918	0.934649	1
REACTOME_ENOS_ACTIVATION_AND_REGULATION	17	-0.292577	-0.614683	0.918293	1
KEGG_LEISHMANIA_INFECTION	64	-0.245062	-0.613956	0.955975	1
PID_PDGFRB_PATHWAY	123	-0.234765	-0.6107	0.982724	1
BIOCARTA_RAS_PATHWAY	23	-0.271892	-0.610142	0.922894	1
REACTOME_ACTIVATION_OF_CHAPERONE_GENES_BY_XBP1S	42	-0.25323	-0.607847	0.956188	1
PID_FOXO_PATHWAY	46	-0.253871	-0.60715	0.954048	1
BIOCARTA_KERATINOCYTE_PATHWAY	41	-0.253918	-0.605442	0.957143	1
BIOCARTA_EGF_PATHWAY	30	-0.265514	-0.605168	0.943678	1
REACTOME_GLYCOSPHINGOLIPID_METABOLISM	27	-0.267794	-0.604922	0.944706	1
REACTOME_OPIOID_SIGNALLING	55	-0.245645	-0.604243	0.955556	1
KEGG_NOTCH_SIGNALING_PATHWAY	42	-0.251913	-0.603983	0.955044	1
REACTOME_GLUCOSE_TRANSPORT	32	-0.256428	-0.601916	0.945977	1
KEGG_NUCLEOTIDE_EXCISION_REPAIR	42	-0.251552	-0.600229	0.951754	1
BIOCARTA_PDGF_PATHWAY	32	-0.256969	-0.59818	0.950646	1
PID_ERBB1_INTERNALIZATION_PATHWAY	38	-0.25032	-0.597657	0.942029	1
SIG_IL4RECEPTOR_IN_B_LYPHOCYTES	27	-0.266427	-0.595448	0.945433	1
BIOCARTA_IL10_PATHWAY	17	-0.28338	-0.594734	0.934406	1
BIOCARTA_BIOPEPTIDES_PATHWAY	34	-0.251869	-0.590438	0.953488	1
REACTOME_PREFOLDIN_MEDIATED_TRANSFER_OF_SUBSTRATE_TO_CCT_TRIC	22	-0.266842	-0.589185	0.938776	1
REACTOME_GLYCEROPHOSPHOLIPID_BIOSYNTHESIS	65	-0.235961	-0.587784	0.979873	1
PID_CDC42_REG_PATHWAY	27	-0.260257	-0.587033	0.950296	1
PID_INSULIN_GLUCOSE_PATHWAY	21	-0.267723	-0.582649	0.929697	1
REACTOME_METABOLISM_OF_PROTEINS	370	-0.21732	-0.579074	1	1
PID_IL2_1PATHWAY	53	-0.233703	-0.578409	0.964516	1
REACTOME_CYTOKINE_SIGNALING_IN_IMMUNE_SYSTEM	232	-0.218642	-0.57792	0.996994	1
PID_S1P_S1P3_PATHWAY	26	-0.255797	-0.577659	0.949883	1
PID_LIS1_PATHWAY	24	-0.256218	-0.576589	0.94152	1
REACTOME_PROTEIN_FOLDING	46	-0.234157	-0.575178	0.966851	1
KEGG_HUNTINGTONS_DISEASE	148	-0.219953	-0.574703	0.997986	1
REACTOME_HIV_INFECTION	183	-0.219796	-0.574409	0.998	1
REACTOME_ABORTIVE_ELONGATION_OF_HIV1_TRANSCRIPT_IN_THE_ABSENCE_OF_TAT	18	-0.270078	-0.572852	0.954037	1
PID_P53_REGULATION_PATHWAY	58	-0.230553	-0.572153	0.980871	1
REACTOME_SIGNALING_BY_ILS	99	-0.223056	-0.570835	0.982618	1
PID_VEGFR1_PATHWAY	24	-0.258315	-0.569617	0.963325	1
REACTOME_ELONGATION_ARREST_AND_RECOVERY	26	-0.247853	-0.565828	0.963615	1
BIOCARTA_EIF4_PATHWAY	23	-0.253366	-0.5585	0.96328	1
PID_HDAC_CLASSII_PATHWAY	30	-0.24354	-0.55756	0.951106	1
KEGG_VASOPRESSIN_REGULATED_WATER_REABSORPTION	36	-0.236134	-0.556162	0.969388	1
BIOCARTA_CARM_ER_PATHWAY	32	-0.237728	-0.556025	0.956171	1
REACTOME_ASSOCIATION_OF_TRIC_CCT_WITH_TARGET_PROTEINS_DURING_BIOSYNTHESIS	26	-0.245979	-0.554748	0.965102	1
PID_MTOR_4PATHWAY	67	-0.220667	-0.553132	0.987288	1
ST_INTERLEUKIN_4_PATHWAY	22	-0.246985	-0.551485	0.959903	1
BIOCARTA_CASPASE_PATHWAY	22	-0.248296	-0.545479	0.969475	1
KEGG_PHOSPHATIDYLINOSITOL_SIGNALING_SYSTEM	62	-0.218212	-0.544888	0.984043	1
KEGG_ADIPOCYTOKINE_SIGNALING_PATHWAY	53	-0.222131	-0.544305	0.980728	1
KEGG_BASAL_TRANSCRIPTION_FACTORS	30	-0.235344	-0.543714	0.973005	1
BIOCARTA_ECM_PATHWAY	23	-0.245513	-0.543538	0.961165	1
KEGG_FC_GAMMA_R_MEDIATED_PHAGOCYTOSIS	84	-0.214446	-0.542745	0.987552	1
KEGG_LONG_TERM_POTENTIATION	48	-0.223508	-0.538647	0.973828	1
BIOCARTA_PTDINS_PATHWAY	23	-0.242742	-0.538405	0.96204	1
REACTOME_PRE_NOTCH_EXPRESSION_AND_PROCESSING	37	-0.229001	-0.537861	0.979798	1
PID_AR_NONGENOMIC_PATHWAY	27	-0.236058	-0.534779	0.976415	1
ST_DIFFERENTIATION_PATHWAY_IN_PC12_CELLS	36	-0.226695	-0.532161	0.9787	1
KEGG_FRUCTOSE_AND_MANNOSE_METABOLISM	29	-0.232218	-0.532071	0.982955	1
REACTOME_SIGNALING_BY_EGFR_IN_CANCER	95	-0.206849	-0.529705	0.994893	1
REACTOME_TRANSCRIPTION	162	-0.201928	-0.528851	0.998995	1
REACTOME_NGF_SIGNALLING_VIA_TRKA_FROM_THE_PLASMA_MEMBRANE	118	-0.204449	-0.526323	0.996936	1
REACTOME_NITRIC_OXIDE_STIMULATES_GUANYLATE_CYCLASE	17	-0.250281	-0.524054	0.961202	1
REACTOME_SIGNALING_BY_NOTCH	85	-0.203608	-0.518595	0.996894	1
ST_TUMOR_NECROSIS_FACTOR_PATHWAY	29	-0.225694	-0.515444	0.990665	1
PID_RAC1_REG_PATHWAY	35	-0.217092	-0.514298	0.986547	1
KEGG_O_GLYCAN_BIOSYNTHESIS	15	-0.248345	-0.513891	0.963542	1
BIOCARTA_CDMAC_PATHWAY	15	-0.242339	-0.504105	0.968112	1
REACTOME_DOWNSTREAM_TCR_SIGNALING	29	-0.223266	-0.503946	0.983927	1
REACTOME_UNFOLDED_PROTEIN_RESPONSE	73	-0.198905	-0.500461	0.99582	1
PID_ERBB1_DOWNSTREAM_PATHWAY	100	-0.191608	-0.489531	0.998976	1
REACTOME_TRAF6_MEDIATED_NFKB_ACTIVATION	20	-0.221337	-0.481986	0.979141	1
PID_ARF_3PATHWAY	19	-0.227359	-0.481099	0.981862	1
BIOCARTA_UCALPAIN_PATHWAY	15	-0.229264	-0.479191	0.97769	1
REACTOME_CIRCADIAN_CLOCK	48	-0.197506	-0.475831	0.996721	1
KEGG_AMINO_SUGAR_AND_NUCLEOTIDE_SUGAR_METABOLISM	42	-0.19617	-0.473889	0.995506	1
KEGG_FC_EPSILON_RI_SIGNALING_PATHWAY	60	-0.19055	-0.473104	0.993644	1
REACTOME_TAK1_ACTIVATES_NFKB_BY_PHOSPHORYLATION_AND_ACTIVATION_OF_IKKS_COMPLEX	22	-0.21425	-0.470232	0.978698	1
KEGG_STARCH_AND_SUCROSE_METABOLISM	22	-0.210877	-0.468927	0.982801	1
KEGG_RNA_DEGRADATION	56	-0.188991	-0.46776	0.995749	1
REACTOME_CLASS_I_MHC_MEDIATED_ANTIGEN_PROCESSING_PRESENTATION	216	-0.177485	-0.46729	1	1
REACTOME_REGULATION_OF_HYPOXIA_INDUCIBLE_FACTOR_HIF_BY_OXYGEN	20	-0.21018	-0.455875	0.987326	1
REACTOME_SIGNALING_BY_WNT	60	-0.182009	-0.452378	0.998952	1
BIOCARTA_RELA_PATHWAY	16	-0.212035	-0.452201	0.988158	1
REACTOME_PROCESSING_OF_CAPPED_INTRONLESS_PRE_MRNA	23	-0.204154	-0.451105	0.995215	1
BIOCARTA_PYK2_PATHWAY	28	-0.189934	-0.43121	0.992072	1
PID_P75_NTR_PATHWAY	56	-0.175479	-0.427397	0.998942	1
REACTOME_DOWNSTREAM_SIGNALING_EVENTS_OF_B_CELL_RECEPTOR_BCR	90	-0.165492	-0.417153	1	1
REACTOME_CA_DEPENDENT_EVENTS	21	-0.189414	-0.412429	0.993857	1
ST_ERK1_ERK2_MAPK_PATHWAY	30	-0.176968	-0.405148	0.997653	1
BIOCARTA_TNFR1_PATHWAY	29	-0.173281	-0.39728	0.996552	1
REACTOME_INTERACTIONS_OF_VPR_WITH_HOST_CELLULAR_PROTEINS	32	-0.163332	-0.378822	0.998869	1
PID_NFKAPPAB_CANONICAL_PATHWAY	22	-0.160193	-0.354483	1	1
REACTOME_ANTIGEN_PROCESSING_UBIQUITINATION_PROTEASOME_DEGRADATION	180	-0.118632	-0.311032	1	0.999939
REACTOME_RNA_POL_III_TRANSCRIPTION	31	-0.129425	-0.294842	1	0.998545

## Sheet: STable2B
Supplementary Table 2B. GSEA was performed on Gene Pattern using gene ontology biological processes and ranked logFC of all genes in post vs pre chemotherapy. List of significantly enriched gene ontology biological processes (p < 0.05) in post vs pre-chemotherapy, NES > 0 means up in post, NES < 0 means down in post vs pre -chemotherapy.
NAME	SIZE	ES	NES	NOM p-val	FDR q-val
GO_NEUTRAL_LIPID_CATABOLIC_PROCESS	22	0.758062	2.26717	0	0.020539
GO_POSITIVE_REGULATION_OF_PATTERN_RECOGNITION_RECEPTOR_SIGNALING_PATHWAY	32	0.630468	2.13612	0	0.0813722
GO_TRIGLYCERIDE_CATABOLIC_PROCESS	15	0.79458	2.10659	0	0.0820985
GO_CELLULAR_RESPONSE_TO_COPPER_ION	18	0.696772	2.01069	0	0.164364
GO_GLYCEROLIPID_CATABOLIC_PROCESS	41	0.568914	1.98502	0	0.165725
GO_CELLULAR_RESPONSE_TO_CADMIUM_ION	29	0.595474	1.92672	0	0.225801
GO_CELLULAR_RESPONSE_TO_LIPOPROTEIN_PARTICLE_STIMULUS	28	0.599282	1.84998	0.0208333	0.369492
GO_CHOLESTEROL_STORAGE	17	0.638104	1.79681	0	0.467863
GO_CELLULAR_RESPONSE_TO_LOW_DENSITY_LIPOPROTEIN_PARTICLE_STIMULUS	16	0.673298	1.79192	0.00480769	0.433325
GO_POSITIVE_REGULATION_OF_TOLL_LIKE_RECEPTOR_SIGNALING_PATHWAY	22	0.580178	1.75147	0.00628931	0.53139
GO_HISTONE_DEACETYLATION	67	0.444142	1.72357	0	0.584309
GO_CYTOPLASMIC_TRANSLATION	94	0.42354	1.72238	0	0.540265
GO_COTRANSLATIONAL_PROTEIN_TARGETING_TO_MEMBRANE	96	0.419469	1.70941	0	0.543744
GO_REGULATION_OF_VOLTAGE_GATED_CALCIUM_CHANNEL_ACTIVITY	21	0.585062	1.70716	0.0182927	0.513202
GO_NEUTRAL_LIPID_METABOLIC_PROCESS	79	0.421476	1.68215	0	0.564932
GO_NUCLEAR_TRANSCRIBED_MRNA_CATABOLIC_PROCESS_NONSENSE_MEDIATED_DECAY	115	0.437318	1.68151	0	0.531884
GO_PATTERN_RECOGNITION_RECEPTOR_SIGNALING_PATHWAY	162	0.305296	1.6415	0	0.643193
GO_NEGATIVE_REGULATION_OF_ENDOTHELIAL_CELL_APOPTOTIC_PROCESS	17	0.596725	1.63341	0.0347826	0.636462
GO_NEGATIVE_REGULATION_OF_NUCLEOCYTOPLASMIC_TRANSPORT	18	0.558204	1.62584	0.0476191	0.631697
GO_NITRIC_OXIDE_SYNTHASE_BIOSYNTHETIC_PROCESS	17	0.587682	1.61483	0.0358974	0.641812
GO_RESPONSE_TO_COLD	37	0.478697	1.61411	0.0247934	0.614162
GO_POSITIVE_REGULATION_OF_INTERLEUKIN_1_PRODUCTION	44	0.463616	1.61385	0.025	0.587005
GO_REGULATION_OF_ENDOTHELIAL_CELL_DIFFERENTIATION	29	0.497234	1.61175	0.0134228	0.568999
GO_PHOSPHATIDYLINOSITOL_DEPHOSPHORYLATION	24	0.525621	1.60811	0.0204082	0.558165
GO_REGULATION_OF_HISTONE_DEACETYLATION	23	0.511128	1.59629	0.0429448	0.57636
GO_REGULATION_OF_PROTEIN_DEACETYLATION	35	0.466149	1.57573	0.0175439	0.626904
GO_INTERLEUKIN_6_PRODUCTION	107	0.3677	1.5754	0	0.604596
GO_REGULATION_OF_MACROPHAGE_DERIVED_FOAM_CELL_DIFFERENTIATION	21	0.5271	1.57238	0.0454545	0.593095
GO_ACID_SECRETION	22	0.518397	1.57219	0.0382166	0.573466
GO_PHOSPHATIDYLINOSITOL_PHOSPHORYLATION	42	0.440615	1.56872	0.0412371	0.566315
GO_POSITIVE_REGULATION_OF_INTERLEUKIN_6_PRODUCTION	67	0.438128	1.56729	0	0.552649
GO_TUMOR_NECROSIS_FACTOR_SECRETION	29	0.487975	1.55498	0.0434783	0.575073
GO_PROTEIN_REFOLDING	21	0.507772	1.55371	0.0342857	0.561546
GO_MYELOID_DENDRITIC_CELL_ACTIVATION	23	0.502982	1.54929	0.0479042	0.560412
GO_MATING	19	0.5398	1.5466	0.045	0.553013
GO_DIACYLGLYCEROL_METABOLIC_PROCESS	18	0.543133	1.54323	0.0545455	0.547609
GO_REGULATION_OF_RIBOSOME_BIOGENESIS	15	0.585811	1.54101	0.0263158	0.539676
GO_REGULATION_OF_TRANSLATIONAL_ELONGATION	17	0.532918	1.53662	0.0588235	0.538309
GO_POSITIVE_REGULATION_OF_LIPID_STORAGE	19	0.532408	1.5355	0.0631579	0.528042
GO_TRIGLYCERIDE_METABOLIC_PROCESS	59	0.42175	1.53402	0.0169492	0.518762
GO_MYD88_DEPENDENT_TOLL_LIKE_RECEPTOR_SIGNALING_PATHWAY	34	0.462148	1.52703	0.00833333	0.527823
GO_INOSITOL_PHOSPHATE_BIOSYNTHETIC_PROCESS	19	0.534814	1.52498	0.0670391	0.521842
GO_DEFENSE_RESPONSE_TO_GRAM_POSITIVE_BACTERIUM	41	0.430313	1.52494	0.0196078	0.509823
GO_RESPONSE_TO_COPPER_ION	28	0.479755	1.52401	0.0268456	0.500748
GO_REGULATION_OF_LEUKOCYTE_DEGRANULATION	36	0.451481	1.52326	0.039604	0.491679
GO_DETECTION_OF_EXTERNAL_BIOTIC_STIMULUS	17	0.543446	1.52296	0.056872	0.482024
GO_NEGATIVE_REGULATION_OF_RECEPTOR_SIGNALING_PATHWAY_VIA_STAT	17	0.523882	1.51719	0.0272727	0.487285
GO_ZINC_ION_HOMEOSTASIS	25	0.495568	1.51028	0.0649351	0.496377
GO_REGULATION_OF_ENDOTHELIAL_CELL_DEVELOPMENT	15	0.555756	1.50923	0.0393013	0.488587
GO_CYTOPLASMIC_TRANSLATIONAL_INITIATION	33	0.43552	1.49774	0.0238095	0.50967
GO_FOAM_CELL_DIFFERENTIATION	25	0.505698	1.49721	0.0727273	0.501095
GO_CELLULAR_RESPONSE_TO_GROWTH_HORMONE_STIMULUS	17	0.55468	1.49299	0.044335	0.50353
GO_FORMATION_OF_CYTOPLASMIC_TRANSLATION_INITIATION_COMPLEX	15	0.566208	1.4917	0.0745614	0.497841
GO_RESPONSE_TO_CADMIUM_ION	50	0.42022	1.48723	0.0136986	0.501641
GO_LIPID_PHOSPHORYLATION	53	0.387843	1.48464	0.0128205	0.499457
GO_NUCLEAR_TRANSCRIBED_MRNA_CATABOLIC_PROCESS	191	0.331128	1.48116	0	0.499671
GO_REGULATION_OF_ESTABLISHMENT_OR_MAINTENANCE_OF_CELL_POLARITY	20	0.498623	1.48112	0.0473684	0.491107
GO_POSITIVE_REGULATION_OF_TUMOR_NECROSIS_FACTOR_BIOSYNTHETIC_PROCESS	20	0.500906	1.4771	0.0537634	0.493375
GO_POSITIVE_REGULATION_OF_PROTEIN_DEACETYLATION	17	0.536316	1.47427	0.0720721	0.492956
GO_TUMOR_NECROSIS_FACTOR_BIOSYNTHETIC_PROCESS	28	0.468676	1.47401	0.0785714	0.485557
GO_NUCLEOTIDE_BINDING_DOMAIN_LEUCINE_RICH_REPEAT_CONTAINING_RECEPTOR_SIGNALING_PATHWAY	34	0.460713	1.47395	0.0175439	0.477861
GO_RESPONSE_TO_MURAMYL_DIPEPTIDE	17	0.545823	1.47235	0.0745614	0.473816
GO_BASE_CONVERSION_OR_SUBSTITUTION_EDITING	15	0.552761	1.46898	0.113208	0.474253
GO_REGULATION_OF_LIPID_STORAGE	42	0.421846	1.4671	0.0617284	0.471357
GO_REGULATION_OF_SYNAPTIC_VESICLE_RECYCLING	19	0.487834	1.46496	0.0628272	0.468954
GO_NEGATIVE_REGULATION_OF_RECEPTOR_SIGNALING_PATHWAY_VIA_JAK_STAT	17	0.523882	1.46051	0.0607477	0.472773
GO_TRANSLATIONAL_INITIATION	177	0.314217	1.45812	0	0.471269
GO_RIG_I_SIGNALING_PATHWAY	20	0.503577	1.45232	0.0732984	0.479736
GO_INTERLEUKIN_1_BETA_PRODUCTION	70	0.371215	1.45042	0.0196078	0.478113
GO_REGULATION_OF_MYELOID_LEUKOCYTE_MEDIATED_IMMUNITY	44	0.405583	1.44951	0.0272727	0.473778
GO_POSITIVE_REGULATION_OF_ERYTHROCYTE_DIFFERENTIATION	29	0.454707	1.44357	0.0564516	0.481703
GO_POSITIVE_REGULATION_OF_TUMOR_NECROSIS_FACTOR_SECRETION	21	0.494767	1.4401	0.0603015	0.483835
GO_RESPONSE_TO_FOOD	17	0.528011	1.43965	0.0921659	0.478506
GO_STEROL_HOMEOSTASIS	49	0.424905	1.43606	0.0384615	0.4811
GO_PLATELET_MORPHOGENESIS	18	0.488906	1.42952	0.0904762	0.491975
GO_RNA_DESTABILIZATION	31	0.448018	1.42489	0.0728477	0.496724
GO_CYTOKINE_SECRETION	91	0.354767	1.41654	0	0.5122
GO_GRANULOCYTE_DIFFERENTIATION	27	0.445849	1.41191	0.0357143	0.518126
GO_NADP_METABOLIC_PROCESS	30	0.431976	1.41177	0.080292	0.511981
GO_HISTONE_H4_K5_ACETYLATION	16	0.518899	1.40993	0.0917431	0.511173
GO_REGULATION_OF_PATTERN_RECOGNITION_RECEPTOR_SIGNALING_PATHWAY	76	0.363719	1.40941	0	0.506199
GO_LIPID_STORAGE	65	0.365737	1.40324	0.02	0.516266
GO_REGULATION_OF_CHOLESTEROL_EFFLUX	20	0.483156	1.39948	0.105263	0.519173
GO_POSITIVE_REGULATION_OF_TUMOR_NECROSIS_FACTOR_SUPERFAMILY_CYTOKINE_PRODUCTION	76	0.360779	1.39846	0.0217391	0.515719
GO_MULTI_ORGANISM_CELLULAR_PROCESS	16	0.493096	1.3978	0.0740741	0.51116
GO_REGULATION_OF_ERYTHROCYTE_DIFFERENTIATION	45	0.376689	1.39766	0.0344828	0.505465
GO_REGULATION_OF_TOLL_LIKE_RECEPTOR_SIGNALING_PATHWAY	58	0.362368	1.39005	0.0617284	0.519494
GO_TYPE_2_IMMUNE_RESPONSE	30	0.41101	1.38879	0.0948276	0.516715
GO_DNA_DEMETHYLATION	22	0.457158	1.38868	0.091954	0.511149
GO_INTERLEUKIN_1_PRODUCTION	79	0.362156	1.38844	0	0.506021
GO_POSITIVE_REGULATION_OF_BLOOD_VESSEL_ENDOTHELIAL_CELL_MIGRATION	40	0.391387	1.38841	0.0540541	0.500531
GO_TUMOR_NECROSIS_FACTOR_SUPERFAMILY_CYTOKINE_PRODUCTION	130	0.327268	1.38752	0.0769231	0.497152
GO_REPRODUCTIVE_BEHAVIOR	15	0.502825	1.38573	0.0905172	0.496223
GO_SYNAPTIC_VESICLE_TRANSPORT	34	0.410273	1.37417	0.132231	0.519503
GO_POSITIVE_REGULATION_OF_MRNA_CATABOLIC_PROCESS	44	0.380758	1.37273	0.0537634	0.517653
GO_INTERLEUKIN_8_PRODUCTION	68	0.349981	1.37179	0.0789474	0.514728
GO_ADAPTIVE_THERMOGENESIS	115	0.317266	1.37014	0	0.514374
GO_AUTOPHAGOSOME_MATURATION	34	0.408578	1.36776	0.0697674	0.51468
GO_POSITIVE_REGULATION_OF_CHOLESTEROL_EFFLUX	15	0.508185	1.36344	0.123016	0.520957
GO_POSITIVE_REGULATION_OF_INTERLEUKIN_8_PRODUCTION	46	0.387908	1.36193	0.0612245	0.519143
GO_NEGATIVE_REGULATION_OF_MUSCLE_CONTRACTION	18	0.477091	1.36062	0.111675	0.517226
GO_REGULATION_OF_CHROMATIN_ASSEMBLY	17	0.489264	1.3558	0.133891	0.524527
GO_POSITIVE_REGULATION_OF_ENDOTHELIAL_CELL_PROLIFERATION	69	0.359977	1.35386	0.0666667	0.524865
GO_HISTONE_H2A_UBIQUITINATION	25	0.431943	1.35243	0.11465	0.523244
GO_RESPIRATORY_BURST	25	0.433057	1.34747	0.122807	0.529888
GO_SYNAPTIC_VESICLE_LOCALIZATION	38	0.394148	1.34667	0.0350877	0.527189
GO_GOLGI_TO_VACUOLE_TRANSPORT	16	0.498599	1.34533	0.135371	0.52552
GO_POSITIVE_REGULATION_OF_CYTOKINE_SECRETION	52	0.388156	1.34239	0.1	0.527867
GO_REGULATION_OF_RNA_EXPORT_FROM_NUCLEUS	16	0.485062	1.33628	0.138122	0.538457
GO_REGULATION_OF_SYSTEMIC_ARTERIAL_BLOOD_PRESSURE_BY_HORMONE	17	0.456442	1.33466	0.124402	0.537587
GO_INTERLEUKIN_12_PRODUCTION	46	0.363016	1.332	0.0617284	0.539583
GO_REGULATION_OF_ANDROGEN_RECEPTOR_SIGNALING_PATHWAY	20	0.45189	1.33077	0.148718	0.537959
GO_CARBOHYDRATE_PHOSPHORYLATION	19	0.45793	1.32986	0.159204	0.535581
GO_MACROMOLECULE_DEACYLATION	91	0.338066	1.32888	0.0967742	0.533458
GO_POSITIVE_REGULATION_OF_LIPID_LOCALIZATION	65	0.366806	1.32715	0.0689655	0.533348
GO_POSITIVE_REGULATION_OF_COLD_INDUCED_THERMOGENESIS	72	0.374863	1.32621	0.0285714	0.530896
GO_REGULATION_OF_CHROMATIN_ASSEMBLY_OR_DISASSEMBLY	22	0.44412	1.32174	0.114286	0.537881
GO_DNA_DEALKYLATION	28	0.412256	1.31926	0.10687	0.53935
GO_NEURON_DEATH_IN_RESPONSE_TO_OXIDATIVE_STRESS	24	0.421536	1.31917	0.136646	0.535065
GO_RESPONSE_TO_DOPAMINE	37	0.389351	1.31623	0.0961538	0.53787
GO_POSITIVE_REGULATION_OF_STEROL_TRANSPORT	21	0.445313	1.3077	0.11236	0.55478
GO_GLUCOSE_6_PHOSPHATE_METABOLIC_PROCESS	21	0.443031	1.3062	0.155914	0.553836
GO_REGULATION_OF_LIPID_LOCALIZATION	99	0.304694	1.30267	0	0.558548
GO_TRIGLYCERIDE_BIOSYNTHETIC_PROCESS	26	0.412811	1.30161	0.122807	0.55673
GO_NEUTRAL_LIPID_BIOSYNTHETIC_PROCESS	31	0.395435	1.29991	0.119403	0.556845
GO_NEGATIVE_REGULATION_OF_CAMP_MEDIATED_SIGNALING	15	0.515123	1.2996	0.185654	0.553404
GO_CHAPERONE_COFACTOR_DEPENDENT_PROTEIN_REFOLDING	27	0.403409	1.29586	0.124183	0.55851
GO_DNA_METHYLATION_DEPENDENT_HETEROCHROMATIN_ASSEMBLY	16	0.447825	1.28266	0.170306	0.590008
GO_NEGATIVE_REGULATION_OF_INTERLEUKIN_1_PRODUCTION	21	0.424071	1.27924	0.131429	0.594846
GO_ENDOTHELIAL_CELL_APOPTOTIC_PROCESS	36	0.389048	1.27248	0.109244	0.608389
GO_NEGATIVE_REGULATION_OF_G_PROTEIN_COUPLED_RECEPTOR_SIGNALING_PATHWAY	32	0.393074	1.26584	0.167939	0.622451
GO_REGULATION_OF_ORGANIC_ACID_TRANSPORT	37	0.378738	1.2623	0.150442	0.627584
GO_HISTONE_UBIQUITINATION	44	0.365303	1.26191	0.138614	0.623917
GO_MITOPHAGY	23	0.412264	1.26001	0.173684	0.624985
GO_RESPONSE_TO_ISOQUINOLINE_ALKALOID	18	0.45418	1.25998	0.165829	0.620403
GO_HISTONE_MONOUBIQUITINATION	26	0.391021	1.24829	0.167832	0.650229
GO_LIPID_HOMEOSTASIS	91	0.314608	1.24755	0.142857	0.647542
GO_REGULATION_OF_LYASE_ACTIVITY	24	0.407713	1.24722	0.164634	0.643884
GO_PROTEIN_AUTOUBIQUITINATION	59	0.337369	1.24644	0.103448	0.641512
GO_REGULATION_OF_MICROTUBULE_BASED_MOVEMENT	20	0.438959	1.24523	0.168367	0.64025
GO_REGULATION_OF_TYPE_2_IMMUNE_RESPONSE	24	0.406568	1.24358	0.16129	0.640477
GO_REGULATION_OF_SYSTEMIC_ARTERIAL_BLOOD_PRESSURE_MEDIATED_BY_A_CHEMICAL_SIGNAL	23	0.411658	1.24059	0.205128	0.644382
GO_HISTONE_H3_DEACETYLATION	20	0.423547	1.23507	0.196172	0.655392
GO_POSITIVE_REGULATION_OF_MYELOID_CELL_DIFFERENTIATION	78	0.317845	1.2322	0.030303	0.659222
GO_RESPONSE_TO_TEMPERATURE_STIMULUS	174	0.274642	1.23092	0	0.658433
GO_RECEPTOR_INTERNALIZATION	74	0.325251	1.22821	0.162162	0.661615
GO_NEGATIVE_REGULATION_OF_INTRACELLULAR_PROTEIN_TRANSPORT	36	0.36328	1.22519	0.142857	0.666292
GO_TOLL_LIKE_RECEPTOR_SIGNALING_PATHWAY	123	0.282656	1.22361	0.0714286	0.666422
GO_MRNA_METHYLATION	15	0.443853	1.2205	0.220721	0.670726
GO_MITOCHONDRIAL_RNA_PROCESSING	16	0.435597	1.21753	0.210526	0.675002
GO_POSITIVE_REGULATION_OF_INFLAMMATORY_RESPONSE	109	0.292994	1.21676	0.0625	0.673093
GO_NEGATIVE_REGULATION_OF_EXOCYTOSIS	22	0.403945	1.21666	0.173653	0.668952
GO_NEGATIVE_REGULATION_OF_OXIDATIVE_STRESS_INDUCED_INTRINSIC_APOPTOTIC_SIGNALING_PATHWAY	16	0.428227	1.21542	0.221198	0.668041
GO_POSITIVE_REGULATION_OF_T_CELL_MEDIATED_CYTOTOXICITY	19	0.413801	1.21337	0.188889	0.670065
GO_LEUKOCYTE_TETHERING_OR_ROLLING	22	0.409044	1.2127	0.189655	0.667707
GO_REGULATION_OF_PROTON_TRANSPORT	15	0.445957	1.21219	0.206731	0.664936
GO_REGULATION_OF_TRANSPOSITION	15	0.439359	1.20971	0.205479	0.668
GO_NEGATIVE_REGULATION_OF_REGULATED_SECRETORY_PATHWAY	17	0.435473	1.20472	0.225225	0.679163
GO_PEPTIDYL_THREONINE_DEPHOSPHORYLATION	20	0.395513	1.20413	0.181818	0.676779
GO_POSITIVE_REGULATION_OF_SMALL_MOLECULE_METABOLIC_PROCESS	97	0.303972	1.20272	0	0.6766
GO_REGULATION_OF_MAST_CELL_ACTIVATION_INVOLVED_IN_IMMUNE_RESPONSE	22	0.406735	1.2025	0.189024	0.673155
GO_POSITIVE_REGULATION_OF_SPROUTING_ANGIOGENESIS	28	0.371964	1.20027	0.167883	0.674957
GO_MATURATION_OF_SSU_RRNA	45	0.34676	1.20005	0.154639	0.671417
GO_NEGATIVE_REGULATION_OF_CELLULAR_RESPONSE_TO_INSULIN_STIMULUS	27	0.36423	1.19673	0.202899	0.677523
GO_ESTABLISHMENT_OF_PROTEIN_LOCALIZATION_TO_ENDOPLASMIC_RETICULUM	109	0.298346	1.18808	0	0.698109
GO_MULTIVESICULAR_BODY_ORGANIZATION	29	0.370297	1.18582	0.205674	0.701109
GO_PHOSPHATIDYLINOSITOL_METABOLIC_PROCESS	140	0.294082	1.1828	0.142857	0.706128
GO_REGULATION_OF_RESPONSE_TO_INTERFERON_GAMMA	20	0.400361	1.18155	0.241935	0.705541
GO_REGULATION_OF_CELLULAR_EXTRAVASATION	26	0.383805	1.18043	0.232877	0.704956
GO_CHOLESTEROL_EFFLUX	28	0.369697	1.17981	0.234043	0.702514
GO_RESPONSE_TO_ZINC_ION	30	0.367412	1.17913	0.201342	0.700596
GO_MONONUCLEAR_CELL_DIFFERENTIATION	31	0.354224	1.17873	0.19685	0.697815
GO_NEGATIVE_REGULATION_OF_RESPONSE_TO_OXIDATIVE_STRESS	38	0.35197	1.17774	0.144231	0.696912
GO_REGULATION_OF_STEROL_TRANSPORT	32	0.354216	1.17681	0.224638	0.695559
GO_3_UTR_MEDIATED_MRNA_DESTABILIZATION	15	0.432378	1.17428	0.234513	0.699361
GO_MAST_CELL_MEDIATED_IMMUNITY	35	0.34307	1.17282	0.161017	0.699546
GO_RESPONSE_TO_NERVE_GROWTH_FACTOR	36	0.338153	1.17197	0.211382	0.698148
GO_INACTIVATION_OF_MAPK_ACTIVITY	21	0.393091	1.17197	0.260417	0.694235
GO_DEMETHYLATION	51	0.314567	1.17026	0.178082	0.695815
GO_NEGATIVE_REGULATION_OF_POTASSIUM_ION_TRANSPORT	17	0.40924	1.16379	0.278846	0.711916
GO_NEGATIVE_REGULATION_OF_INTRACELLULAR_TRANSPORT	44	0.340449	1.15746	0.188119	0.727408
GO_ANGIOGENESIS_INVOLVED_IN_WOUND_HEALING	21	0.372475	1.15492	0.233333	0.731141
GO_POSITIVE_REGULATION_OF_MICROTUBULE_POLYMERIZATION_OR_DEPOLYMERIZATION	28	0.358759	1.15313	0.23741	0.732868
GO_RETINOL_METABOLIC_PROCESS	22	0.388703	1.15094	0.319277	0.735587
GO_SPLICEOSOMAL_COMPLEX_ASSEMBLY	50	0.317911	1.15083	0.183099	0.73193
GO_POSITIVE_REGULATION_OF_PHOSPHOPROTEIN_PHOSPHATASE_ACTIVITY	16	0.425415	1.14951	0.242424	0.731911
GO_POSITIVE_REGULATION_OF_SIGNALING_RECEPTOR_ACTIVITY	24	0.367236	1.14827	0.25	0.731729
GO_NEGATIVE_REGULATION_OF_LIPID_STORAGE	19	0.402338	1.14817	0.265625	0.728122
GO_POSITIVE_REGULATION_OF_ERAD_PATHWAY	15	0.424599	1.14572	0.295455	0.731669
GO_MYELOID_LEUKOCYTE_DIFFERENTIATION	163	0.261548	1.14292	0	0.736447
GO_POSITIVE_REGULATION_OF_PHOSPHATASE_ACTIVITY	25	0.357673	1.13869	0.273292	0.746008
GO_NADPH_REGENERATION	17	0.406076	1.13759	0.28125	0.745553
GO_RESPONSE_TO_AMPHETAMINE	16	0.426033	1.13585	0.27451	0.747421
GO_MRNA_SPLICE_SITE_SELECTION	25	0.377766	1.13509	0.2625	0.746045
GO_NEGATIVE_REGULATION_OF_ION_TRANSMEMBRANE_TRANSPORT	60	0.306588	1.13467	0.215385	0.743593
GO_REGULATION_OF_CELL_MIGRATION_INVOLVED_IN_SPROUTING_ANGIOGENESIS	27	0.369894	1.13413	0.248175	0.741712
GO_MATURATION_OF_SSU_RRNA_FROM_TRICISTRONIC_RRNA_TRANSCRIPT_SSU_RRNA_5_8S_RRNA_LSU_RRNA	34	0.346457	1.1337	0.245902	0.739136
GO_REGULATION_OF_LIPID_TRANSPORT	70	0.289511	1.13226	0.2	0.7399
GO_C21_STEROID_HORMONE_METABOLIC_PROCESS	20	0.390351	1.13081	0.265625	0.740536
GO_RETROGRADE_TRANSPORT_ENDOSOME_TO_GOLGI	71	0.286811	1.13052	0.205882	0.737994
GO_TEMPERATURE_HOMEOSTASIS	129	0.284757	1.13012	0.142857	0.735658
GO_REGULATION_OF_EARLY_ENDOSOME_TO_LATE_ENDOSOME_TRANSPORT	17	0.402735	1.12777	0.30622	0.739607
GO_HISTONE_H3_K4_TRIMETHYLATION	16	0.42041	1.12497	0.301724	0.744063
GO_POSITIVE_REGULATION_OF_LIPID_TRANSPORT	47	0.321935	1.12395	0.297872	0.743888
GO_TRNA_METHYLATION	37	0.33356	1.1221	0.242991	0.745953
GO_NUCLEOTIDE_EXCISION_REPAIR_PREINCISION_COMPLEX_STABILIZATION	20	0.384537	1.12133	0.275862	0.74461
GO_POSITIVE_REGULATION_OF_LEUKOCYTE_DEGRANULATION	19	0.382697	1.11915	0.346591	0.747861
GO_PEROXISOME_PROLIFERATOR_ACTIVATED_RECEPTOR_SIGNALING_PATHWAY	15	0.421337	1.11871	0.336283	0.745467
GO_REGULATION_OF_CYTOPLASMIC_TRANSLATION	24	0.365789	1.11776	0.316901	0.744932
GO_CELL_DEATH_IN_RESPONSE_TO_OXIDATIVE_STRESS	68	0.286429	1.11643	0.192308	0.745622
GO_BROWN_FAT_CELL_DIFFERENTIATION	37	0.325091	1.11439	0.264706	0.748222
GO_PEPTIDYL_L_CYSTEINE_S_PALMITOYLATION	18	0.390096	1.11098	0.3	0.755301
GO_RESPONSE_TO_MITOCHONDRIAL_DEPOLARISATION	18	0.395159	1.11046	0.26601	0.753211
GO_POSITIVE_REGULATION_OF_LIPID_BIOSYNTHETIC_PROCESS	58	0.30858	1.11021	0.254237	0.750486
GO_REGULATION_OF_CYCLASE_ACTIVITY	22	0.369847	1.10887	0.264901	0.751062
GO_REGULATION_OF_ANION_TRANSMEMBRANE_TRANSPORT	21	0.368499	1.10711	0.315789	0.753095
GO_POSITIVE_REGULATION_OF_MYELOID_LEUKOCYTE_MEDIATED_IMMUNITY	27	0.346	1.10501	0.28481	0.755891
GO_PROTEIN_DNA_COMPLEX_DISASSEMBLY	17	0.382086	1.10199	0.316062	0.761775
GO_REGULATION_OF_FATTY_ACID_OXIDATION	24	0.358861	1.10038	0.3	0.763086
GO_NEGATIVE_REGULATION_OF_LIPID_LOCALIZATION	30	0.33641	1.09973	0.30719	0.761483
GO_INTRACELLULAR_LIPID_TRANSPORT	32	0.333034	1.0993	0.246032	0.75951
GO_NEGATIVE_REGULATION_OF_CATION_CHANNEL_ACTIVITY	25	0.366952	1.09904	0.318841	0.756922
GO_DE_NOVO_PROTEIN_FOLDING	34	0.318395	1.09898	0.27027	0.75372
GO_REGULATION_OF_MICROTUBULE_POLYMERIZATION	39	0.318475	1.09816	0.301887	0.752997
GO_PROTEIN_DEMETHYLATION	26	0.342325	1.09622	0.299401	0.755884
GO_HISTONE_H2A_MONOUBIQUITINATION	16	0.397719	1.09482	0.344538	0.756947
GO_LENS_FIBER_CELL_DIFFERENTIATION	23	0.354359	1.09404	0.307692	0.756014
GO_ACTIVATION_OF_CYSTEINE_TYPE_ENDOPEPTIDASE_ACTIVITY_INVOLVED_IN_APOPTOTIC_PROCESS	69	0.286163	1.09274	0.23913	0.756467
GO_PHOSPHOLIPID_DEPHOSPHORYLATION	26	0.362571	1.09224	0.308725	0.75456
GO_POSITIVE_REGULATION_OF_DEPHOSPHORYLATION	48	0.306869	1.09216	0.270588	0.751518
GO_FEEDING_BEHAVIOR	34	0.335235	1.09211	0.28866	0.748407
GO_GOLGI_TO_ENDOSOME_TRANSPORT	15	0.398361	1.08748	0.341122	0.759907
GO_NEGATIVE_REGULATION_OF_CYTOKINE_SECRETION	20	0.369596	1.08703	0.312169	0.757844
GO_NEGATIVE_REGULATION_OF_BLOOD_PRESSURE	24	0.352666	1.08373	0.331081	0.764522
GO_HISTONE_DEUBIQUITINATION	22	0.376296	1.08262	0.331081	0.764782
GO_NEGATIVE_REGULATION_OF_INTERLEUKIN_12_PRODUCTION	15	0.400029	1.08214	0.336364	0.763051
GO_POSITIVE_REGULATION_OF_LIPID_METABOLIC_PROCESS	104	0.257546	1.08122	0.272727	0.762608
GO_POSITIVE_REGULATION_OF_MACROPHAGE_ACTIVATION	18	0.375228	1.08013	0.34	0.762461
GO_REGULATION_OF_OXIDATIVE_STRESS_INDUCED_CELL_DEATH	51	0.299752	1.07907	0.287879	0.762578
GO_ACTIVATION_OF_PHOSPHOLIPASE_C_ACTIVITY	24	0.356874	1.07717	0.347305	0.765431
GO_POSITIVE_REGULATION_OF_REGULATED_SECRETORY_PATHWAY	37	0.30824	1.07581	0.308411	0.766467
GO_CELLULAR_EXTRAVASATION	52	0.299083	1.07436	0.307692	0.767633
GO_NEGATIVE_REGULATION_OF_TRANSMEMBRANE_TRANSPORT	76	0.287902	1.06866	0.285714	0.782273
GO_REGULATION_OF_LONG_TERM_NEURONAL_SYNAPTIC_PLASTICITY	18	0.382169	1.06695	0.351351	0.784367
GO_REGULATION_OF_GLUCOSE_IMPORT	40	0.298276	1.0659	0.287234	0.784648
GO_MYD88_INDEPENDENT_TOLL_LIKE_RECEPTOR_SIGNALING_PATHWAY	34	0.316722	1.06303	0.342105	0.790383
GO_DEFENSE_RESPONSE_TO_GRAM_NEGATIVE_BACTERIUM	28	0.328482	1.06291	0.321429	0.787557
GO_MATURATION_OF_5_8S_RRNA	35	0.302736	1.06261	0.353982	0.785353
GO_POSITIVE_REGULATION_OF_AUTOPHAGY	115	0.257612	1.06113	0.277778	0.787089
GO_POSITIVE_REGULATION_OF_CELLULAR_EXTRAVASATION	18	0.368159	1.06047	0.352657	0.785855
GO_LEUKOCYTE_HOMEOSTASIS	70	0.289851	1.05919	0.372093	0.786758
GO_GLOBAL_GENOME_NUCLEOTIDE_EXCISION_REPAIR	25	0.342479	1.05805	0.316129	0.787068
GO_REGULATION_OF_INNATE_IMMUNE_RESPONSE	236	0.232396	1.05791	0	0.784398
GO_POSITIVE_REGULATION_OF_CELL_SUBSTRATE_JUNCTION_ORGANIZATION	25	0.335293	1.05779	0.374194	0.781725
GO_APOPTOTIC_CELL_CLEARANCE	38	0.305499	1.05548	0.306931	0.785994
GO_POSITIVE_REGULATION_OF_CHEMOKINE_PRODUCTION	47	0.303473	1.05548	0.25	0.782981
GO_REGULATION_OF_OXIDATIVE_STRESS_INDUCED_INTRINSIC_APOPTOTIC_SIGNALING_PATHWAY	23	0.346896	1.05484	0.370787	0.781692
GO_REGULATION_OF_PLASMA_LIPOPROTEIN_PARTICLE_LEVELS	59	0.286685	1.05452	0.366667	0.779699
GO_PEPTIDYL_CYSTEINE_MODIFICATION	38	0.310003	1.05415	0.375	0.777908
GO_PROTEIN_LIPID_COMPLEX_SUBUNIT_ORGANIZATION	29	0.326171	1.05322	0.321429	0.777863
GO_NEGATIVE_REGULATION_OF_ATP_METABOLIC_PROCESS	22	0.351018	1.0528	0.389535	0.776217
GO_ENDOCRINE_PROCESS	44	0.290169	1.052	0.358025	0.775591
GO_BLOOD_VESSEL_REMODELING	29	0.330473	1.04643	0.388889	0.790031
GO_LEARNING	81	0.264278	1.04611	0.371429	0.788027
GO_GENETIC_IMPRINTING	21	0.345003	1.04338	0.36875	0.79345
GO_VASCULAR_ENDOTHELIAL_GROWTH_FACTOR_PRODUCTION	27	0.328711	1.04217	0.394737	0.794418
GO_POSITIVE_REGULATION_OF_PROTEIN_DEPHOSPHORYLATION	38	0.315544	1.03825	0.326531	0.803165
GO_POSITIVE_REGULATION_OF_CATION_CHANNEL_ACTIVITY	38	0.312062	1.03726	0.345133	0.803213
GO_POSITIVE_REGULATION_OF_CYTOKINE_BIOSYNTHETIC_PROCESS	31	0.316921	1.0368	0.37037	0.801437
GO_REGULATION_OF_ADENYLATE_CYCLASE_ACTIVITY	16	0.387703	1.03466	0.432039	0.804958
GO_REGULATION_OF_MAST_CELL_ACTIVATION	29	0.32727	1.03222	0.417323	0.809746
GO_INTRINSIC_APOPTOTIC_SIGNALING_PATHWAY_IN_RESPONSE_TO_OXIDATIVE_STRESS	38	0.302595	1.03127	0.383178	0.809547
GO_MODULATION_OF_EXCITATORY_POSTSYNAPTIC_POTENTIAL	22	0.336698	1.02921	0.402685	0.812971
GO_CYTOPLASMIC_PATTERN_RECOGNITION_RECEPTOR_SIGNALING_PATHWAY	58	0.288252	1.02906	0.377049	0.810546
GO_REGULATION_OF_GENE_EXPRESSION_BY_GENETIC_IMPRINTING	15	0.38341	1.02706	0.444444	0.81379
GO_LATE_ENDOSOME_TO_VACUOLE_TRANSPORT	22	0.352194	1.02678	0.403226	0.811668
GO_RESPONSE_TO_INTERLEUKIN_4	27	0.319793	1.0266	0.401408	0.809299
GO_REGULATION_OF_CELLULAR_RESPONSE_TO_INSULIN_STIMULUS	55	0.274675	1.02198	0.439024	0.820783
GO_NEGATIVE_REGULATION_OF_EPITHELIAL_CELL_APOPTOTIC_PROCESS	27	0.32739	1.02044	0.413793	0.82259
GO_POSITIVE_REGULATION_OF_INTERLEUKIN_12_PRODUCTION	27	0.335751	1.01998	0.433121	0.821003
GO_REGULATION_OF_CALCIUM_ION_TRANSMEMBRANE_TRANSPORTER_ACTIVITY	50	0.273054	1.0191	0.428571	0.820805
GO_REGULATION_OF_PROTEIN_SUMOYLATION	23	0.337163	1.01707	0.401198	0.823958
GO_NEGATIVE_REGULATION_OF_TRANSPORTER_ACTIVITY	44	0.291145	1.01576	0.376623	0.824596
GO_POSITIVE_REGULATION_OF_NUCLEOTIDE_METABOLIC_PROCESS	28	0.313732	1.01383	0.416107	0.827511
GO_MIRNA_METABOLIC_PROCESS	24	0.324843	1.01187	0.459259	0.830701
GO_CD8_POSITIVE_ALPHA_BETA_T_CELL_ACTIVATION	22	0.332161	1.01179	0.42268	0.828027
GO_POSITIVE_REGULATION_OF_MUSCLE_CELL_APOPTOTIC_PROCESS	19	0.346174	1.01057	0.447964	0.828809
GO_RNA_METHYLATION	69	0.273043	1.01021	0.372549	0.827114
GO_REGULATION_OF_ANOIKIS	18	0.352637	1.00803	0.449198	0.83105
GO_REGULATION_OF_MITOPHAGY	16	0.361364	1.00777	0.415094	0.82893
GO_REGULATION_OF_AMINO_ACID_TRANSPORT	20	0.341283	1.00576	0.45	0.832157
GO_INOSITOL_PHOSPHATE_METABOLIC_PROCESS	51	0.268692	1.00504	0.361446	0.831423
GO_POSITIVE_REGULATION_OF_LONG_TERM_SYNAPTIC_POTENTIATION	15	0.376214	1.0034	0.435897	0.833643
GO_NEGATIVE_REGULATION_OF_PEPTIDYL_SERINE_PHOSPHORYLATION	22	0.343297	1.00251	0.478947	0.833511
GO_SECRETORY_GRANULE_ORGANIZATION	22	0.326605	1.0021	0.459893	0.831811
GO_CELLULAR_PROTEIN_CONTAINING_COMPLEX_LOCALIZATION	19	0.347399	1.00155	0.445055	0.830675
GO_LYSOSOMAL_TRANSPORT	94	0.251222	1.00067	0.566667	0.830715
GO_LONG_CHAIN_FATTY_ACID_TRANSPORT	46	0.288846	0.995071	0.421053	0.845411
GO_INTRASPECIES_INTERACTION_BETWEEN_ORGANISMS	22	0.33231	0.994805	0.476744	0.843483
GO_VIRAL_BUDDING	24	0.311836	0.991681	0.460674	0.849912
GO_ANTIGEN_PROCESSING_AND_PRESENTATION_OF_ENDOGENOUS_ANTIGEN	21	0.323922	0.988136	0.532544	0.85793
GO_MITOCHONDRIAL_RNA_METABOLIC_PROCESS	39	0.279728	0.987862	0.435644	0.85591
GO_POSITIVE_REGULATION_OF_INTERFERON_BETA_PRODUCTION	29	0.306607	0.985276	0.489362	0.860831
GO_POSITIVE_REGULATION_OF_CD4_POSITIVE_ALPHA_BETA_T_CELL_DIFFERENTIATION	25	0.320647	0.984137	0.51875	0.861649
GO_RIBOSOMAL_SMALL_SUBUNIT_BIOGENESIS	66	0.26529	0.984056	0.45098	0.859051
GO_MICROTUBULE_POLYMERIZATION	62	0.260747	0.98399	0.557692	0.856451
GO_POSITIVE_REGULATION_OF_ALCOHOL_BIOSYNTHETIC_PROCESS	16	0.356189	0.982687	0.45	0.857301
GO_REGULATION_OF_PROTEIN_POLYUBIQUITINATION	19	0.335924	0.981765	0.463158	0.857532
GO_DOPAMINE_RECEPTOR_SIGNALING_PATHWAY	23	0.318379	0.978456	0.484849	0.864581
GO_VASODILATION	20	0.33248	0.977291	0.472222	0.865433
GO_POSITIVE_REGULATION_OF_RNA_SPLICING	29	0.307167	0.975781	0.452174	0.867482
GO_MEMBRANE_REPOLARIZATION_DURING_ACTION_POTENTIAL	15	0.362872	0.972748	0.480176	0.873757
GO_ACTIVATION_OF_INNATE_IMMUNE_RESPONSE	116	0.233194	0.971403	0.6	0.875277
GO_NEGATIVE_REGULATION_OF_OXIDATIVE_STRESS_INDUCED_NEURON_DEATH	16	0.35077	0.970215	0.495192	0.876126
GO_INTRACELLULAR_STEROL_TRANSPORT	18	0.341445	0.969896	0.485149	0.874165
GO_ENDONUCLEOLYTIC_CLEAVAGE_INVOLVED_IN_RRNA_PROCESSING	16	0.349774	0.967954	0.502392	0.877485
GO_BETA_CATENIN_DESTRUCTION_COMPLEX_DISASSEMBLY	17	0.336341	0.967695	0.509804	0.875448
GO_REGULATION_OF_CYTOPLASMIC_TRANSPORT	21	0.321289	0.965777	0.497041	0.878686
GO_REGULATION_OF_PROTEIN_AUTOPHOSPHORYLATION	44	0.262416	0.964721	0.535714	0.879075
GO_POSITIVE_REGULATION_OF_FATTY_ACID_METABOLIC_PROCESS	26	0.302958	0.963042	0.45912	0.881265
GO_RESPONSE_TO_CATECHOLAMINE	52	0.271345	0.960608	0.537037	0.885865
GO_NEGATIVE_REGULATION_OF_INTERLEUKIN_1_BETA_PRODUCTION	17	0.338835	0.959387	0.507772	0.886691
GO_MEMBRANE_FUSION	122	0.243209	0.958412	0.636364	0.88702
GO_AUTOPHAGOSOME_ORGANIZATION	87	0.256369	0.957723	0.655172	0.886416
GO_REGULATION_OF_TUMOR_NECROSIS_FACTOR_MEDIATED_SIGNALING_PATHWAY	45	0.264026	0.95706	0.53012	0.885584
GO_POSITIVE_REGULATION_OF_ERBB_SIGNALING_PATHWAY	28	0.305172	0.956284	0.50365	0.885014
GO_P38MAPK_CASCADE	38	0.266053	0.956279	0.5	0.882322
GO_REGULATION_OF_NUCLEAR_TRANSCRIBED_MRNA_CATABOLIC_PROCESS_DEADENYLATION_DEPENDENT_DECAY	15	0.350013	0.956197	0.513274	0.879884
GO_RIBONUCLEOPROTEIN_COMPLEX_SUBUNIT_ORGANIZATION	178	0.25014	0.952895	1	0.886694
GO_MICROTUBULE_NUCLEATION	28	0.293177	0.952859	0.520661	0.88412
GO_POSITIVE_REGULATION_OF_T_HELPER_1_TYPE_IMMUNE_RESPONSE	16	0.330865	0.952376	0.507109	0.882883
GO_MATURATION_OF_5_8S_RRNA_FROM_TRICISTRONIC_RRNA_TRANSCRIPT_SSU_RRNA_5_8S_RRNA_LSU_RRNA	25	0.302496	0.951727	0.584337	0.882169
GO_RESPONSE_TO_ATP	22	0.320413	0.95136	0.527273	0.880806
GO_POSITIVE_REGULATION_OF_INTERFERON_ALPHA_PRODUCTION	19	0.322515	0.947943	0.486772	0.888127
GO_PHOSPHATIDYLCHOLINE_ACYL_CHAIN_REMODELING	16	0.346533	0.946242	0.495652	0.890411
GO_REGULATION_OF_NEUROTRANSMITTER_RECEPTOR_ACTIVITY	32	0.290574	0.946215	0.559633	0.887838
GO_REGULATION_OF_NUCLEOTIDE_BIOSYNTHETIC_PROCESS	26	0.305123	0.945919	0.52	0.88595
GO_NECROTIC_CELL_DEATH	45	0.268753	0.942772	0.580645	0.892313
GO_VACUOLAR_TRANSPORT	131	0.223701	0.942335	0.833333	0.891058
GO_POSITIVE_REGULATION_OF_RECEPTOR_INTERNALIZATION	17	0.332896	0.941643	0.517588	0.890407
GO_POSITIVE_REGULATION_OF_LEUKOCYTE_ADHESION_TO_VASCULAR_ENDOTHELIAL_CELL	19	0.322047	0.939644	0.523316	0.89366
GO_NEGATIVE_REGULATION_OF_PROTEIN_TYROSINE_KINASE_ACTIVITY	24	0.295507	0.939537	0.529412	0.89137
GO_REGULATION_OF_CAMP_MEDIATED_SIGNALING	27	0.305773	0.938479	0.527397	0.89183
GO_NEGATIVE_REGULATION_OF_PROTEIN_DEPHOSPHORYLATION	42	0.262627	0.936971	0.625	0.893482
GO_REGULATION_OF_PHAGOCYTOSIS	70	0.242687	0.936543	0.595238	0.892107
GO_POSITIVE_REGULATION_OF_ALPHA_BETA_T_CELL_ACTIVATION	52	0.264869	0.936302	0.550725	0.890268
GO_REGULATION_OF_PROTEIN_TARGETING_TO_MITOCHONDRION	39	0.282328	0.934882	0.5	0.891762
GO_LIPID_MODIFICATION	186	0.211862	0.929695	0.5	0.903637
GO_LYSOSOME_LOCALIZATION	57	0.241113	0.929478	0.655172	0.901681
GO_PEPTIDYL_SERINE_DEPHOSPHORYLATION	17	0.331744	0.927337	0.536458	0.905108
GO_TOLL_LIKE_RECEPTOR_3_SIGNALING_PATHWAY	20	0.313612	0.927319	0.535912	0.902572
GO_INOSITOL_PHOSPHATE_CATABOLIC_PROCESS	15	0.339756	0.927152	0.566038	0.900425
GO_POSITIVE_REGULATION_OF_T_HELPER_CELL_DIFFERENTIATION	19	0.325095	0.926763	0.535714	0.899119
GO_MYELOID_CELL_HOMEOSTASIS	127	0.226565	0.925215	0.631579	0.900867
GO_NEGATIVE_REGULATION_OF_OXIDOREDUCTASE_ACTIVITY	18	0.325318	0.924589	0.584416	0.899963
GO_POSITIVE_REGULATION_OF_MRNA_METABOLIC_PROCESS	68	0.250611	0.923174	0.586956	0.901579
GO_POSITIVE_REGULATION_OF_ALPHA_BETA_T_CELL_DIFFERENTIATION	40	0.269396	0.923129	0.625	0.899148
GO_REGULATION_OF_AUTOPHAGOSOME_ASSEMBLY	33	0.280369	0.920284	0.517241	0.904295
GO_MAST_CELL_ACTIVATION	42	0.249699	0.919973	0.67	0.902672
GO_POSITIVE_REGULATION_OF_INTERLEUKIN_10_PRODUCTION	28	0.288733	0.919525	0.573427	0.901399
GO_EXPORT_ACROSS_PLASMA_MEMBRANE	31	0.287648	0.918254	0.620968	0.902387
GO_CELLULAR_RESPONSE_TO_AMYLOID_BETA	34	0.267682	0.918112	0.590909	0.900346
GO_VIRAL_GENE_EXPRESSION	182	0.202383	0.917776	1	0.898731
GO_NEGATIVE_REGULATION_OF_REACTIVE_OXYGEN_SPECIES_BIOSYNTHETIC_PROCESS	24	0.290504	0.916165	0.580645	0.900737
GO_PRIMARY_ALCOHOL_METABOLIC_PROCESS	53	0.244299	0.912651	0.632353	0.907971
GO_REGULATION_OF_NECROTIC_CELL_DEATH	23	0.29977	0.912171	0.65	0.906787
GO_POSITIVE_REGULATION_OF_GLUCOSE_TRANSMEMBRANE_TRANSPORT	29	0.286432	0.912049	0.551181	0.904587
GO_NUCLEAR_TRANSCRIBED_MRNA_CATABOLIC_PROCESS_EXONUCLEOLYTIC	34	0.272674	0.911045	0.59542	0.904773
GO_POSITIVE_REGULATION_OF_UBIQUITIN_DEPENDENT_PROTEIN_CATABOLIC_PROCESS	87	0.237976	0.908642	0.714286	0.908441
GO_LYMPHOID_PROGENITOR_CELL_DIFFERENTIATION	15	0.326097	0.908501	0.584906	0.906426
GO_PURINE_NUCLEOSIDE_TRIPHOSPHATE_METABOLIC_PROCESS	54	0.260127	0.907557	0.64557	0.906538
GO_REGULATION_OF_GLUTAMATE_RECEPTOR_SIGNALING_PATHWAY	25	0.2878	0.906996	0.590643	0.905486
GO_GLYCEROL_ETHER_METABOLIC_PROCESS	17	0.343475	0.905333	0.569149	0.90758
GO_POSITIVE_REGULATION_OF_ALPHA_BETA_T_CELL_PROLIFERATION	18	0.309855	0.904598	0.576191	0.907055
GO_CERAMIDE_BIOSYNTHETIC_PROCESS	46	0.254095	0.902872	0.623377	0.909234
GO_RNA_MODIFICATION	141	0.228997	0.902384	0.875	0.907995
GO_PORPHYRIN_CONTAINING_COMPOUND_METABOLIC_PROCESS	30	0.277839	0.901297	0.634328	0.908331
GO_NUCLEOTIDE_EXCISION_REPAIR_DNA_DUPLEX_UNWINDING	21	0.298706	0.900956	0.631902	0.906754
GO_NEGATIVE_REGULATION_OF_INTERLEUKIN_8_PRODUCTION	16	0.321761	0.899423	0.578947	0.908584
GO_NEGATIVE_REGULATION_OF_ENDOPLASMIC_RETICULUM_STRESS_INDUCED_INTRINSIC_APOPTOTIC_SIGNALING_PATHWAY	15	0.328137	0.898254	0.592105	0.909214
GO_SNRNA_PROCESSING	22	0.296782	0.896597	0.623595	0.910967
GO_POSITIVE_REGULATION_OF_PHAGOCYTOSIS	51	0.241793	0.896376	0.646341	0.909237
GO_RESPONSE_TO_DSRNA	32	0.275196	0.895755	0.604317	0.908188
GO_REGULATION_OF_FATTY_ACID_BIOSYNTHETIC_PROCESS	35	0.261712	0.892269	0.669643	0.914505
GO_POSITIVE_REGULATION_OF_MACROAUTOPHAGY	59	0.243536	0.888893	0.714286	0.92068
GO_RRNA_CONTAINING_RIBONUCLEOPROTEIN_COMPLEX_EXPORT_FROM_NUCLEUS	15	0.325365	0.888734	0.573913	0.91869
GO_IMPORT_INTO_NUCLEUS	136	0.217339	0.88795	1	0.91852
GO_ACTIVATION_OF_PROTEIN_KINASE_B_ACTIVITY	23	0.289683	0.887732	0.664804	0.916672
GO_VACUOLAR_ACIDIFICATION	22	0.288037	0.88631	0.604027	0.917865
GO_CHAPERONE_MEDIATED_PROTEIN_FOLDING	50	0.245051	0.886284	0.693333	0.915561
GO_LYMPHOCYTE_ACTIVATION_INVOLVED_IN_IMMUNE_RESPONSE	135	0.214126	0.885381	0.923077	0.915545
GO_P_BODY_ASSEMBLY	19	0.309457	0.883622	0.626263	0.917537
GO_POSITIVE_REGULATION_OF_GLYCOLYTIC_PROCESS	15	0.319723	0.883359	0.669565	0.915851
GO_POSITIVE_REGULATION_OF_AUTOPHAGY_OF_MITOCHONDRION	19	0.301508	0.880117	0.663507	0.92154
GO_GTP_METABOLIC_PROCESS	20	0.309565	0.879561	0.60989	0.920591
GO_REGULATION_OF_NUCLEOTIDE_METABOLIC_PROCESS	87	0.231878	0.878458	0.666667	0.920911
GO_CELLULAR_LIPID_CATABOLIC_PROCESS	166	0.217151	0.873892	1	0.929614
GO_NEGATIVE_REGULATION_OF_VASCULAR_ASSOCIATED_SMOOTH_MUSCLE_CELL_PROLIFERATION	15	0.320465	0.87299	0.638298	0.929438
GO_RNA_EXPORT_FROM_NUCLEUS	130	0.20902	0.872943	1	0.927251
GO_PRODUCTION_OF_MOLECULAR_MEDIATOR_INVOLVED_IN_INFLAMMATORY_RESPONSE	55	0.24576	0.872872	0.666667	0.925089
GO_DNA_METHYLATION_OR_DEMETHYLATION	71	0.22824	0.869608	0.790698	0.930867
GO_PEPTIDE_CATABOLIC_PROCESS	20	0.293597	0.8693	0.63125	0.929345
GO_REGULATION_OF_LIPOPOLYSACCHARIDE_MEDIATED_SIGNALING_PATHWAY	22	0.287193	0.867982	0.633721	0.930305
GO_GLYCEROLIPID_BIOSYNTHETIC_PROCESS	206	0.201749	0.86733	1	0.929529
GO_TRNA_WOBBLE_URIDINE_MODIFICATION	15	0.31525	0.861693	0.636771	0.940388
GO_ALTERNATIVE_MRNA_SPLICING_VIA_SPLICEOSOME	69	0.221576	0.857399	0.770833	0.94772
GO_MITOCHONDRIAL_FISSION	35	0.250991	0.856524	0.658333	0.9474
GO_NEGATIVE_REGULATION_OF_REACTIVE_OXYGEN_SPECIES_METABOLIC_PROCESS	41	0.250757	0.854617	0.733333	0.949473
GO_POSITIVE_REGULATION_OF_INTERLEUKIN_2_PRODUCTION	26	0.271597	0.851554	0.729323	0.954145
GO_MRNA_EXPORT_FROM_NUCLEUS	104	0.200348	0.849272	0.92	0.956855
GO_B_CELL_ACTIVATION_INVOLVED_IN_IMMUNE_RESPONSE	60	0.223676	0.847561	0.784615	0.958275
GO_NEGATIVE_REGULATION_OF_AUTOPHAGY	70	0.227193	0.843932	0.833333	0.964301
GO_VIRAL_BUDDING_VIA_HOST_ESCRT_COMPLEX	19	0.293589	0.841239	0.71123	0.968033
GO_NEGATIVE_REGULATION_OF_PHAGOCYTOSIS	16	0.295873	0.840451	0.682203	0.967544
GO_ETHER_METABOLIC_PROCESS	19	0.293802	0.840442	0.686275	0.965229
GO_DENDRITIC_CELL_DIFFERENTIATION	34	0.250665	0.840354	0.77451	0.963031
GO_POSITIVE_REGULATION_OF_PROTEIN_TARGETING_TO_MITOCHONDRION	31	0.258467	0.838546	0.739837	0.964627
GO_CELLULAR_RESPONSE_TO_HEAT	105	0.199431	0.836712	0.85	0.966336
GO_TETRAPYRROLE_BIOSYNTHETIC_PROCESS	24	0.26941	0.835812	0.735714	0.966039
GO_RESPONSE_TO_AMINO_ACID_STARVATION	42	0.239483	0.835122	0.754717	0.965277
GO_AMINO_ACID_IMPORT	27	0.270551	0.831558	0.723926	0.970552
GO_NUCLEOTIDE_EXCISION_REPAIR_PREINCISION_COMPLEX_ASSEMBLY	28	0.259236	0.830909	0.75	0.969682
GO_NCRNA_CATABOLIC_PROCESS	29	0.252799	0.830533	0.715232	0.968182
GO_LYMPHOCYTE_HOMEOSTASIS	50	0.230881	0.826287	0.824324	0.974365
GO_RECEPTOR_RECYCLING	26	0.258316	0.824468	0.774193	0.976096
GO_EXTRACELLULAR_TRANSPORT	21	0.279156	0.824387	0.715847	0.973967
GO_POSITIVE_REGULATION_OF_P38MAPK_CASCADE	21	0.271567	0.824193	0.726776	0.972044
GO_N_TERMINAL_PROTEIN_AMINO_ACID_MODIFICATION	24	0.261913	0.824099	0.740964	0.969994
GO_VIRAL_RELEASE_FROM_HOST_CELL	30	0.254505	0.82343	0.788462	0.969107
GO_NEUROTRANSMITTER_RECEPTOR_TRANSPORT	29	0.257845	0.817172	0.727273	0.979575
GO_NEGATIVE_REGULATION_OF_MUSCLE_HYPERTROPHY	21	0.28242	0.816647	0.745455	0.978427
GO_ENDOPLASMIC_RETICULUM_MANNOSE_TRIMMING	15	0.297808	0.814282	0.70892	0.981066
GO_TOLL_LIKE_RECEPTOR_4_SIGNALING_PATHWAY	29	0.26594	0.812522	0.731092	0.982396
GO_REGULATION_OF_FATTY_ACID_METABOLIC_PROCESS	69	0.219853	0.811755	0.878049	0.9817
GO_CLEAVAGE_INVOLVED_IN_RRNA_PROCESSING	28	0.255903	0.807075	0.80916	0.988564
GO_RNA_5_END_PROCESSING	20	0.268213	0.8011	0.801047	0.997495
GO_NEGATIVE_REGULATION_OF_TRANSLATIONAL_INITIATION	17	0.277692	0.800982	0.719807	0.995459
GO_POSITIVE_REGULATION_OF_CD4_POSITIVE_ALPHA_BETA_T_CELL_ACTIVATION	29	0.253058	0.800654	0.731343	0.993768
GO_POSITIVE_REGULATION_OF_MRNA_SPLICING_VIA_SPLICEOSOME	17	0.289754	0.79818	0.712766	0.996182
GO_REGULATION_OF_CELLULAR_RESPONSE_TO_HEAT	71	0.202838	0.795585	0.957447	0.998746
GO_RIBONUCLEOSIDE_CATABOLIC_PROCESS	16	0.282603	0.793926	0.778281	0.999668
GO_MAINTENANCE_OF_PROTEIN_LOCATION_IN_NUCLEUS	22	0.255757	0.792583	0.714286	1
GO_PROTEIN_K63_LINKED_UBIQUITINATION	51	0.215718	0.791607	0.8	0.99941
GO_PROTEIN_LOCALIZATION_TO_ENDOPLASMIC_RETICULUM	133	0.186594	0.790081	1	0.999982
GO_REGULATION_OF_MRNA_SPLICING_VIA_SPLICEOSOME	91	0.184251	0.789159	0.96	0.999292
GO_NEGATIVE_REGULATION_OF_PEPTIDYL_TYROSINE_PHOSPHORYLATION	43	0.221813	0.783726	0.831683	1
GO_MATURE_B_CELL_DIFFERENTIATION	22	0.258144	0.783602	0.794118	1
GO_REGULATION_OF_MITOCHONDRIAL_FISSION	21	0.266236	0.78257	0.751445	1
GO_REGULATION_OF_HISTONE_H3_K9_METHYLATION	18	0.269809	0.780616	0.789773	1
GO_CHROMATIN_DISASSEMBLY	17	0.280486	0.778456	0.747706	1
GO_AUTOPHAGY_OF_MITOCHONDRION	73	0.197935	0.774522	0.925	1
GO_IMMUNOGLOBULIN_PRODUCTION_INVOLVED_IN_IMMUNOGLOBULIN_MEDIATED_IMMUNE_RESPONSE	44	0.221713	0.771259	0.87013	1
GO_REGULATION_OF_NATURAL_KILLER_CELL_ACTIVATION	24	0.251033	0.769979	0.841772	1
GO_RIBONUCLEOSIDE_TRIPHOSPHATE_METABOLIC_PROCESS	52	0.216784	0.768284	0.892308	1
GO_DOSAGE_COMPENSATION	15	0.286932	0.767774	0.8	1
GO_POSITIVE_REGULATION_OF_MAST_CELL_ACTIVATION	15	0.292397	0.767239	0.812808	1
GO_PHOSPHATIDYLINOSITOL_BIOSYNTHETIC_PROCESS	102	0.190559	0.766345	0.96	1
GO_RNA_PHOSPHODIESTER_BOND_HYDROLYSIS_EXONUCLEOLYTIC	41	0.226868	0.7656	0.90411	1
GO_REGULATION_OF_ATP_BIOSYNTHETIC_PROCESS	15	0.28411	0.765194	0.783019	1
GO_COENZYME_A_METABOLIC_PROCESS	15	0.286731	0.762965	0.781991	1
GO_MATURE_B_CELL_DIFFERENTIATION_INVOLVED_IN_IMMUNE_RESPONSE	17	0.261282	0.762236	0.79	1
GO_NUCLEAR_TRANSCRIBED_MRNA_CATABOLIC_PROCESS_DEADENYLATION_DEPENDENT_DECAY	64	0.20333	0.760681	0.962264	1
GO_REGULATION_OF_CYSTEINE_TYPE_ENDOPEPTIDASE_ACTIVITY_INVOLVED_IN_APOPTOTIC_SIGNALING_PATHWAY	17	0.267041	0.759762	0.813472	1
GO_RELAXATION_OF_MUSCLE	20	0.256466	0.758054	0.818182	1
GO_ALCOHOL_CATABOLIC_PROCESS	32	0.229828	0.75801	0.866142	1
GO_INTERLEUKIN_1_MEDIATED_SIGNALING_PATHWAY	97	0.193256	0.755623	1	1
GO_POLY_A_PLUS_MRNA_EXPORT_FROM_NUCLEUS	15	0.281677	0.755048	0.730435	1
GO_NEGATIVE_REGULATION_OF_HISTONE_MODIFICATION	35	0.222325	0.75089	0.825688	1
GO_RIBOSOMAL_SMALL_SUBUNIT_ASSEMBLY	17	0.264257	0.749402	0.815534	1
GO_RESPONSE_TO_ANGIOTENSIN	19	0.256285	0.749231	0.809249	1
GO_TRNA_MODIFICATION	80	0.182312	0.746407	0.965517	1
GO_PROGRAMMED_NECROTIC_CELL_DEATH	39	0.219171	0.746227	0.894231	1
GO_TRNA_WOBBLE_BASE_MODIFICATION	19	0.257169	0.745391	0.849741	1
GO_RRNA_METABOLIC_PROCESS	209	0.176568	0.740335	1	1
GO_SNRNA_TRANSCRIPTION	66	0.198851	0.737274	0.97561	1
GO_NEGATIVE_REGULATION_OF_CHROMATIN_ORGANIZATION	42	0.200958	0.736768	0.953488	1
GO_REGULATION_OF_DNA_TEMPLATED_TRANSCRIPTION_INITIATION	38	0.223395	0.732826	0.92233	1
GO_ESTABLISHMENT_OF_RNA_LOCALIZATION	180	0.162786	0.730543	1	1
GO_RESPONSE_TO_HEAT	132	0.1715	0.730237	1	1
GO_TYPE_I_INTERFERON_PRODUCTION	111	0.170592	0.72906	1	1
GO_POSITIVE_REGULATION_OF_CILIUM_ASSEMBLY	16	0.251674	0.724192	0.820755	1
GO_REGULATION_OF_ERAD_PATHWAY	28	0.218678	0.71991	0.918519	1
GO_REGULATION_OF_MRNA_POLYADENYLATION	15	0.261	0.718388	0.84058	1
GO_RIBOSOMAL_LARGE_SUBUNIT_BIOGENESIS	67	0.196332	0.716656	0.943396	1
GO_DRUG_METABOLIC_PROCESS	15	0.267899	0.716051	0.84141	1
GO_NCRNA_3_END_PROCESSING	35	0.21707	0.715763	0.903846	1
GO_SNRNA_METABOLIC_PROCESS	32	0.218131	0.713841	0.896552	1
GO_HISTONE_H3_ACETYLATION	52	0.200956	0.710553	1	1
GO_ESTABLISHMENT_OF_PROTEIN_LOCALIZATION_TO_VACUOLE	44	0.206664	0.70745	0.938776	1
GO_CELLULAR_RESPONSE_TO_DSRNA	18	0.241436	0.701276	0.875576	1
GO_RNA_PHOSPHODIESTER_BOND_HYDROLYSIS_ENDONUCLEOLYTIC	70	0.182217	0.698223	1	1
GO_RRNA_MODIFICATION	30	0.218097	0.696277	0.9	1
GO_NEGATIVE_REGULATION_OF_PROTEIN_MODIFICATION_BY_SMALL_PROTEIN_CONJUGATION_OR_REMOVAL	75	0.180673	0.695128	1	1
GO_POSITIVE_REGULATION_OF_DNA_TEMPLATED_TRANSCRIPTION_ELONGATION	24	0.224702	0.69384	0.88125	1
GO_IRON_SULFUR_CLUSTER_ASSEMBLY	18	0.243182	0.692346	0.876289	1
GO_MATURATION_OF_LSU_RRNA	26	0.220968	0.690586	0.922078	1
GO_NEGATIVE_REGULATION_OF_ORGANELLE_ASSEMBLY	35	0.205451	0.689795	0.964912	1
GO_PEPTIDYL_LYSINE_TRIMETHYLATION	36	0.203893	0.686501	0.923077	1
GO_RRNA_CATABOLIC_PROCESS	18	0.236436	0.685905	0.905263	1
GO_REGULATION_OF_TRIGLYCERIDE_METABOLIC_PROCESS	24	0.223266	0.684495	0.901841	1
GO_POSITIVE_REGULATION_OF_TYPE_I_INTERFERON_PRODUCTION	67	0.17913	0.680202	1	1
GO_ORGANELLE_MEMBRANE_FUSION	82	0.170803	0.679661	1	1
GO_NEUROTRANSMITTER_RECEPTOR_INTERNALIZATION	15	0.244202	0.677745	0.881278	1
GO_NEGATIVE_REGULATION_OF_INTRACELLULAR_STEROID_HORMONE_RECEPTOR_SIGNALING_PATHWAY	26	0.209133	0.676443	0.917721	1
GO_ENERGY_HOMEOSTASIS	26	0.208624	0.675908	0.94	1
GO_TERMINATION_OF_RNA_POLYMERASE_I_TRANSCRIPTION	28	0.203457	0.668778	0.910959	1
GO_RIBOSOME_ASSEMBLY	55	0.196144	0.665591	0.952381	1
GO_RNA_PHOSPHODIESTER_BOND_HYDROLYSIS	135	0.177297	0.664439	1	1
GO_NEGATIVE_REGULATION_OF_PROTEIN_ACETYLATION	17	0.232778	0.65884	0.938889	1
GO_POSTSYNAPTIC_NEUROTRANSMITTER_RECEPTOR_INTERNALIZATION	15	0.244202	0.658335	0.910638	1
GO_POSITIVE_REGULATION_OF_SIGNAL_TRANSDUCTION_BY_P53_CLASS_MEDIATOR	17	0.234934	0.657905	0.898477	1
GO_REGULATION_OF_CARBOHYDRATE_CATABOLIC_PROCESS	70	0.172243	0.649817	0.977273	1
GO_LATE_ENDOSOME_TO_VACUOLE_TRANSPORT_VIA_MULTIVESICULAR_BODY_SORTING_PATHWAY	15	0.238895	0.64805	0.90458	1
GO_DNA_TEMPLATED_TRANSCRIPTION_TERMINATION	70	0.166786	0.642176	0.959184	1
GO_REGULATION_OF_FATTY_ACID_BETA_OXIDATION	15	0.237146	0.636832	0.915556	1
GO_POSITIVE_REGULATION_OF_PROTEIN_CONTAINING_COMPLEX_DISASSEMBLY	27	0.202267	0.633611	0.975309	1
GO_REGULATION_OF_TRANSCRIPTION_INITIATION_FROM_RNA_POLYMERASE_II_PROMOTER	31	0.191278	0.631067	0.97541	1
GO_PROTEIN_SUMOYLATION	72	0.158078	0.630917	0.974359	1
GO_MRNA_MODIFICATION	20	0.217923	0.63007	0.940541	1
GO_RRNA_METHYLATION	18	0.220828	0.629618	0.954023	1
GO_REGULATION_OF_TRANSCRIPTION_ELONGATION_FROM_RNA_POLYMERASE_II_PROMOTER	24	0.206389	0.626064	0.962733	1
GO_RNA_POLYADENYLATION	41	0.182152	0.625607	0.990991	1
GO_RNA_CAPPING	30	0.181283	0.614868	0.970149	1
GO_TRANSCRIPTION_INITIATION_FROM_RNA_POLYMERASE_I_PROMOTER	33	0.181327	0.610085	0.983607	1
GO_MRNA_3_END_PROCESSING	94	0.155484	0.608456	1	1
GO_NUCLEAR_TRANSCRIBED_MRNA_POLY_A_TAIL_SHORTENING	27	0.196539	0.606537	0.952756	1
GO_REGULATION_OF_CENTRIOLE_REPLICATION	20	0.2071	0.60564	0.971264	1
GO_RIBOSOMAL_LARGE_SUBUNIT_ASSEMBLY	26	0.195692	0.602514	0.942029	1
GO_NCRNA_TRANSCRIPTION	94	0.149009	0.599546	1	1
GO_VESICLE_CARGO_LOADING	20	0.211356	0.59651	0.960674	1
GO_TRNA_METABOLIC_PROCESS	152	0.125974	0.595736	1	1
GO_POSITIVE_REGULATION_OF_TRANSLATION	117	0.141062	0.591945	1	1
GO_INTRA_GOLGI_VESICLE_MEDIATED_TRANSPORT	31	0.180053	0.591641	0.982143	1
GO_REGULATION_OF_DNA_DAMAGE_RESPONSE_SIGNAL_TRANSDUCTION_BY_P53_CLASS_MEDIATOR	25	0.195158	0.586284	0.980263	1
GO_MRNA_TRANSPORT	137	0.140016	0.582234	1	1
GO_TRANSCRIPTION_ELONGATION_FROM_RNA_POLYMERASE_I_PROMOTER	27	0.18124	0.581475	0.978723	1
GO_NCRNA_EXPORT_FROM_NUCLEUS	35	0.176424	0.578936	1	1
GO_TRNA_TRANSPORT	33	0.176396	0.573173	1	1
GO_DETECTION_OF_VISIBLE_LIGHT	22	0.192054	0.57072	0.962963	1
GO_TERMINATION_OF_RNA_POLYMERASE_II_TRANSCRIPTION	35	0.166322	0.564503	0.990566	1
GO_MODULATION_BY_VIRUS_OF_HOST_PROCESS	26	0.176741	0.558172	1	1
GO_RNA_LOCALIZATION	212	0.125806	0.551841	1	1
GO_MEMBRANE_PROTEIN_INTRACELLULAR_DOMAIN_PROTEOLYSIS	16	0.197509	0.550298	0.972851	1
GO_MRNA_CIS_SPLICING_VIA_SPLICEOSOME	29	0.169979	0.548319	0.993007	1
GO_NUCLEOTIDE_EXCISION_REPAIR_DNA_DAMAGE_RECOGNITION	23	0.182394	0.547757	0.982143	1
GO_MRNA_CLEAVAGE	20	0.190117	0.546769	0.984849	1
GO_NUCLEAR_ENVELOPE_REASSEMBLY	18	0.188498	0.542421	0.98913	1
GO_NEGATIVE_REGULATION_OF_PEPTIDYL_LYSINE_ACETYLATION	15	0.197977	0.53477	0.975728	1
GO_RNA_INTERFERENCE	15	0.190041	0.526062	0.986239	1
GO_VIRION_ASSEMBLY	38	0.148646	0.504211	1	1
GO_TRNA_PROCESSING	115	0.1256	0.503835	1	1
GO_PROTEIN_QUALITY_CONTROL_FOR_MISFOLDED_OR_INCOMPLETELY_SYNTHESIZED_PROTEINS	28	0.159002	0.500853	1	1
GO_RNA_SURVEILLANCE	15	0.174158	0.4782	0.99095	1
GO_REGULATION_OF_DNA_TEMPLATED_TRANSCRIPTION_ELONGATION	42	0.137604	0.473903	1	1
GO_RNA_3_END_PROCESSING	129	0.116	0.472035	1	1
GO_TRANSCRIPTION_ELONGATION_FROM_RNA_POLYMERASE_II_PROMOTER	73	0.106066	0.42909	1	1
GO_DNA_TEMPLATED_TRANSCRIPTION_ELONGATION	101	0.0993546	0.38273	1	0.999881
GO_PROTEIN_POLYUBIQUITINATION	298	0.151122	---	---	1
GO_RNA_SPLICING_VIA_TRANSESTERIFICATION_REACTIONS	314	0.194991	---	---	1
GO_MYELOID_LEUKOCYTE_MEDIATED_IMMUNITY	467	0.27022	---	---	1
GO_MRNA_PROCESSING	443	0.13183	---	---	1
GO_RNA_CATABOLIC_PROCESS	362	0.144726	---	---	1
GO_PHOSPHOLIPID_METABOLIC_PROCESS	332	0.197432	---	---	1
GO_GLYCEROPHOSPHOLIPID_METABOLIC_PROCESS	259	0.202236	---	---	1
GO_RIBONUCLEOPROTEIN_COMPLEX_BIOGENESIS	394	0.187393	---	---	1
GO_NCRNA_PROCESSING	340	0.155049	---	---	1
GO_NCRNA_METABOLIC_PROCESS	398	0.145287	---	---	1
GO_RIBOSOME_BIOGENESIS	273	0.16565	---	---	1
GO_GLYCEROLIPID_METABOLIC_PROCESS	306	0.272398	---	---	1
GO_ESTABLISHMENT_OF_PROTEIN_LOCALIZATION_TO_ORGANELLE	488	0.140183	---	---	1
GO_ION_HOMEOSTASIS	491	-0.442138	-1.17883	0.02	0.54245
GO_MULTICELLULAR_ORGANISM_REPRODUCTION	479	-0.447539	-1.19281	0.017	0.518363
GO_REGULATION_OF_ANATOMICAL_STRUCTURE_SIZE	347	-0.449551	-1.19376	0.039	0.515843
GO_METAL_ION_HOMEOSTASIS	388	-0.454103	-1.2088	0.026	0.487485
GO_POSITIVE_REGULATION_OF_CELL_ADHESION	323	-0.458159	-1.21412	0.037037	0.478599
GO_CELL_CYCLE_G1_S_PHASE_TRANSITION	241	-0.462272	-1.22723	0.042	0.458394
GO_GLYCOPROTEIN_METABOLIC_PROCESS	290	-0.469103	-1.23488	0.017017	0.444174
GO_DOUBLE_STRAND_BREAK_REPAIR	202	-0.468314	-1.23507	0.0480962	0.444513
GO_RESPONSE_TO_DRUG	261	-0.464471	-1.23669	0.03	0.442025
GO_REGULATION_OF_ACTIN_FILAMENT_BASED_PROCESS	296	-0.463562	-1.23745	0.026	0.440596
GO_REGULATION_OF_CELL_CYCLE_PHASE_TRANSITION	392	-0.46322	-1.23936	0.013	0.435777
GO_BLOOD_VESSEL_MORPHOGENESIS	419	-0.470143	-1.25312	0.005	0.410191
GO_ACTIN_FILAMENT_ORGANIZATION	325	-0.471912	-1.25478	0.011	0.406445
GO_NERVOUS_SYSTEM_PROCESS	490	-0.471304	-1.25498	0.004	0.407145
GO_VESICLE_LOCALIZATION	187	-0.481599	-1.25686	0.0411647	0.403925
GO_NEGATIVE_REGULATION_OF_CELL_CYCLE_PROCESS	288	-0.480218	-1.26225	0.012	0.394803
GO_PEPTIDE_HORMONE_SECRETION	151	-0.48647	-1.26267	0.0453629	0.394065
GO_REGULATION_OF_HORMONE_SECRETION	156	-0.485065	-1.26629	0.0451354	0.388247
GO_CELL_GROWTH	351	-0.47973	-1.27272	0.004	0.378118
GO_CELLULAR_AMINO_ACID_METABOLIC_PROCESS	229	-0.484179	-1.27442	0.027	0.376465
GO_POSITIVE_REGULATION_OF_CELL_CELL_ADHESION	213	-0.480074	-1.27459	0.024024	0.376411
GO_NEGATIVE_REGULATION_OF_ORGANELLE_ORGANIZATION	319	-0.477747	-1.27471	0.006	0.376519
GO_EPITHELIAL_CELL_PROLIFERATION	264	-0.485761	-1.27628	0.017	0.374746
GO_REGULATION_OF_CELL_CELL_ADHESION	322	-0.483183	-1.27833	0.00900901	0.371785
GO_NEGATIVE_REGULATION_OF_RESPONSE_TO_EXTERNAL_STIMULUS	265	-0.487568	-1.28659	0.00900901	0.359934
GO_DNA_RECOMBINATION	216	-0.487656	-1.28801	0.016016	0.357383
GO_REGULATION_OF_CELL_CYCLE_G2_M_PHASE_TRANSITION	190	-0.488564	-1.2916	0.0300903	0.353757
GO_NEGATIVE_REGULATION_OF_CELL_CYCLE_PHASE_TRANSITION	216	-0.491677	-1.296	0.0140421	0.344982
GO_REGULATION_OF_CELLULAR_COMPONENT_SIZE	282	-0.487922	-1.29702	0.003003	0.343551
GO_CELL_CYCLE_G2_M_PHASE_TRANSITION	240	-0.4922	-1.29747	0.009	0.343196
GO_POSITIVE_REGULATION_OF_WNT_SIGNALING_PATHWAY	146	-0.500812	-1.29858	0.0361809	0.342422
GO_REGULATION_OF_CELL_JUNCTION_ASSEMBLY	128	-0.502297	-1.29881	0.0352467	0.34228
GO_NEGATIVE_REGULATION_OF_CANONICAL_WNT_SIGNALING_PATHWAY	137	-0.501319	-1.29992	0.0444444	0.340987
GO_CELL_MATRIX_ADHESION	169	-0.495061	-1.30251	0.0240964	0.338395
GO_PROTEIN_KINASE_B_SIGNALING	173	-0.499165	-1.30396	0.0150905	0.336236
GO_MICROTUBULE_CYTOSKELETON_ORGANIZATION	444	-0.491988	-1.30751	0	0.328367
GO_REGULATION_OF_DNA_REPAIR	102	-0.519484	-1.3084	0.037871	0.32686
GO_NEGATIVE_REGULATION_OF_CYTOSKELETON_ORGANIZATION	118	-0.501984	-1.3093	0.0455927	0.325338
GO_DNA_PACKAGING	132	-0.505112	-1.31111	0.0301811	0.324365
GO_REGULATION_OF_NEUROTRANSMITTER_LEVELS	132	-0.507062	-1.31338	0.0311558	0.320261
GO_POSITIVE_REGULATION_OF_CANONICAL_WNT_SIGNALING_PATHWAY	121	-0.502236	-1.31733	0.0474268	0.314431
GO_SKELETAL_MUSCLE_ORGAN_DEVELOPMENT	96	-0.518806	-1.31964	0.0471795	0.310653
GO_ESTABLISHMENT_OF_ORGANELLE_LOCALIZATION	359	-0.496801	-1.32093	0.001	0.308715
GO_MULTICELLULAR_ORGANISMAL_SIGNALING	97	-0.51284	-1.32184	0.0467955	0.307229
GO_NEGATIVE_REGULATION_OF_CELL_PROJECTION_ORGANIZATION	125	-0.510144	-1.3234	0.0282828	0.305301
GO_DEVELOPMENT_OF_PRIMARY_SEXUAL_CHARACTERISTICS	145	-0.50895	-1.32622	0.0222672	0.299585
GO_MUSCLE_CELL_PROLIFERATION	144	-0.510963	-1.32768	0.0242424	0.296391
GO_NEGATIVE_REGULATION_OF_MITOTIC_CELL_CYCLE	276	-0.505309	-1.33139	0.003003	0.291044
GO_NEGATIVE_REGULATION_OF_NEURON_PROJECTION_DEVELOPMENT	103	-0.522435	-1.33332	0.0327198	0.28882
GO_TRANSITION_METAL_ION_TRANSPORT	89	-0.519961	-1.33408	0.0390545	0.288267
GO_HUMORAL_IMMUNE_RESPONSE	118	-0.517491	-1.33418	0.0266121	0.288776
GO_DNA_CONFORMATION_CHANGE	236	-0.505017	-1.3352	0.003	0.286802
GO_NEGATIVE_REGULATION_OF_CELL_CELL_ADHESION	135	-0.517472	-1.33548	0.0273003	0.286493
GO_NEUROTRANSMITTER_TRANSPORT	123	-0.514104	-1.33585	0.0263425	0.286038
GO_NEGATIVE_REGULATION_OF_WNT_SIGNALING_PATHWAY	157	-0.511549	-1.33605	0.00907258	0.285961
GO_RESPONSE_TO_STEROID_HORMONE	240	-0.507176	-1.34417	0.001	0.272757
GO_RECOMBINATIONAL_REPAIR	117	-0.523712	-1.34532	0.0193483	0.270855
GO_CELL_PROJECTION_ASSEMBLY	437	-0.503971	-1.34777	0	0.267445
GO_AMEBOIDAL_TYPE_CELL_MIGRATION	299	-0.504899	-1.34851	0.002	0.266101
GO_REGULATION_OF_GROWTH	471	-0.505255	-1.35152	0	0.262165
GO_GLIOGENESIS	202	-0.515029	-1.35456	0.00702811	0.256887
GO_DNA_INTEGRITY_CHECKPOINT	142	-0.521001	-1.35462	0.0120968	0.257122
GO_SENSORY_PERCEPTION	238	-0.513463	-1.35588	0	0.25573
GO_ADULT_BEHAVIOR	72	-0.541018	-1.35785	0.0349206	0.254361
GO_TAXIS	421	-0.513233	-1.35802	0	0.254327
GO_IN_UTERO_EMBRYONIC_DEVELOPMENT	292	-0.514587	-1.35879	0.002	0.253339
GO_ESTABLISHMENT_OF_CELL_POLARITY	115	-0.523716	-1.35891	0.0244151	0.253444
GO_ACTIN_FILAMENT_BUNDLE_ORGANIZATION	121	-0.527307	-1.36327	0.0173116	0.245764
GO_ASTROCYTE_DIFFERENTIATION	55	-0.566315	-1.3636	0.0424178	0.24578
GO_INTEGRIN_MEDIATED_SIGNALING_PATHWAY	86	-0.537569	-1.36562	0.0300207	0.241702
GO_NOTCH_SIGNALING_PATHWAY	130	-0.522121	-1.36683	0.0160804	0.23983
GO_VITAMIN_METABOLIC_PROCESS	90	-0.531268	-1.36732	0.026749	0.239562
GO_ALPHA_AMINO_ACID_METABOLIC_PROCESS	130	-0.525355	-1.36751	0.0171717	0.239886
GO_PROTEIN_LOCALIZATION_TO_CHROMOSOME	72	-0.53775	-1.37015	0.0465116	0.236832
GO_REGULATION_OF_WOUND_HEALING	100	-0.529065	-1.37062	0.0212551	0.236524
GO_DENDRITIC_SPINE_DEVELOPMENT	76	-0.542046	-1.37083	0.0414079	0.236456
GO_CELL_SURFACE_RECEPTOR_SIGNALING_PATHWAY_INVOLVED_IN_CELL_CELL_SIGNALING	428	-0.510268	-1.371	0	0.236478
GO_REGULATION_OF_CELL_DIVISION	117	-0.534235	-1.37236	0.00810537	0.234762
GO_NEGATIVE_REGULATION_OF_LEUKOCYTE_DIFFERENTIATION	74	-0.549985	-1.37402	0.0279503	0.232339
GO_CELL_SUBSTRATE_ADHESION	262	-0.520013	-1.37413	0	0.232468
GO_OOGENESIS	51	-0.560771	-1.37457	0.0449198	0.232307
GO_NEGATIVE_REGULATION_OF_CELL_DIFFERENTIATION	439	-0.514869	-1.37678	0	0.229171
GO_LAMELLIPODIUM_ASSEMBLY	51	-0.571704	-1.3775	0.0405702	0.228393
GO_COLUMNAR_CUBOIDAL_EPITHELIAL_CELL_DIFFERENTIATION	69	-0.55337	-1.37794	0.0353063	0.228104
GO_REGULATION_OF_NEURAL_PRECURSOR_CELL_PROLIFERATION	47	-0.575949	-1.38161	0.0469945	0.222837
GO_GLIAL_CELL_DEVELOPMENT	85	-0.536833	-1.3821	0.0217166	0.222974
GO_POSITIVE_REGULATION_OF_CELL_CYCLE	306	-0.521419	-1.38255	0	0.222448
GO_RESPONSE_TO_GROWTH_FACTOR	479	-0.518118	-1.38398	0	0.221331
GO_MATERNAL_PROCESS_INVOLVED_IN_FEMALE_PREGNANCY	48	-0.570212	-1.38662	0.0413043	0.219318
GO_POSITIVE_REGULATION_OF_CELL_DEVELOPMENT	369	-0.523271	-1.38861	0	0.216309
GO_PIGMENTATION	74	-0.545219	-1.38869	0.0271682	0.216513
GO_CANONICAL_WNT_SIGNALING_PATHWAY	243	-0.526262	-1.38889	0	0.216464
GO_ESTABLISHMENT_OF_MITOTIC_SPINDLE_LOCALIZATION	31	-0.602553	-1.38927	0.0482204	0.215987
GO_WOUND_HEALING	359	-0.520311	-1.38988	0	0.215484
GO_ENSHEATHMENT_OF_NEURONS	95	-0.536711	-1.39026	0.0204708	0.215055
GO_CRANIAL_SKELETAL_SYSTEM_DEVELOPMENT	38	-0.593537	-1.39206	0.0453001	0.212048
GO_CYTOKINESIS	129	-0.534352	-1.39228	0.00404449	0.211989
GO_ANTIGEN_PROCESSING_AND_PRESENTATION_OF_PEPTIDE_OR_POLYSACCHARIDE_ANTIGEN_VIA_MHC_CLASS_II	94	-0.53549	-1.39298	0.0235897	0.211982
GO_ENDOCRINE_SYSTEM_DEVELOPMENT	61	-0.564977	-1.39333	0.0378151	0.211592
GO_ACTION_POTENTIAL	71	-0.545292	-1.39341	0.0230126	0.211818
GO_ANIMAL_ORGAN_REGENERATION	55	-0.564696	-1.39407	0.0467588	0.210793
GO_REGULATION_OF_CELLULAR_RESPONSE_TO_TRANSFORMING_GROWTH_FACTOR_BETA_STIMULUS	95	-0.544553	-1.39426	0.0164609	0.210783
GO_NEGATIVE_REGULATION_OF_LEUKOCYTE_CELL_CELL_ADHESION	94	-0.548346	-1.39457	0.0195675	0.210854
GO_POSITIVE_REGULATION_OF_RESPONSE_TO_WOUNDING	47	-0.566167	-1.39525	0.0338428	0.210251
GO_FIBROBLAST_PROLIFERATION	66	-0.556537	-1.39606	0.0308183	0.209825
GO_DENDRITE_MORPHOGENESIS	106	-0.547618	-1.39652	0.0131579	0.20931
GO_INORGANIC_ANION_TRANSPORT	84	-0.550779	-1.39676	0.0167189	0.209593
GO_FEMALE_GAMETE_GENERATION	87	-0.545451	-1.398	0.0163934	0.208098
GO_RESPONSE_TO_TRANSFORMING_GROWTH_FACTOR_BETA	190	-0.526171	-1.39804	0.00100402	0.208408
GO_APICAL_JUNCTION_ASSEMBLY	55	-0.566889	-1.40017	0.0402969	0.205401
GO_ESTABLISHMENT_OR_MAINTENANCE_OF_CELL_POLARITY	174	-0.539263	-1.40214	0.00300903	0.201841
GO_NEGATIVE_REGULATION_OF_OSSIFICATION	41	-0.590656	-1.40275	0.0400891	0.201015
GO_REGULATION_OF_CYCLIN_DEPENDENT_PROTEIN_KINASE_ACTIVITY	86	-0.550789	-1.40281	0.0197505	0.201275
GO_POSITIVE_REGULATION_OF_PROTEIN_KINASE_B_SIGNALING	113	-0.537114	-1.40358	0.0173469	0.200092
GO_NEURAL_RETINA_DEVELOPMENT	32	-0.606083	-1.40487	0.0489749	0.197878
GO_REGULATION_OF_CELL_ADHESION_MEDIATED_BY_INTEGRIN	38	-0.602641	-1.40529	0.0365854	0.197436
GO_SOMITOGENESIS	39	-0.590806	-1.40533	0.0463801	0.197716
GO_POSITIVE_REGULATION_OF_CELL_CYCLE_PROCESS	227	-0.536015	-1.40636	0	0.195963
GO_CHROMATIN_REMODELING_AT_CENTROMERE	27	-0.631224	-1.40641	0.034965	0.196223
GO_CELL_CELL_SIGNALING_BY_WNT	383	-0.528498	-1.40644	0	0.196537
GO_POSITIVE_REGULATION_OF_DENDRITE_MORPHOGENESIS	31	-0.61382	-1.40743	0.040724	0.194974
GO_DENDRITIC_SPINE_MORPHOGENESIS	43	-0.588873	-1.40929	0.0393013	0.192104
GO_NEGATIVE_REGULATION_OF_TRANSMEMBRANE_RECEPTOR_PROTEIN_SERINE_THREONINE_KINASE_SIGNALING_PATHWAY	82	-0.549663	-1.40991	0.015448	0.191275
GO_NEGATIVE_REGULATION_OF_CELL_POPULATION_PROLIFERATION	471	-0.528461	-1.41014	0	0.191547
GO_RESPONSE_TO_NUTRIENT	118	-0.542405	-1.41025	0.00304878	0.191665
GO_NEGATIVE_REGULATION_OF_CELL_ADHESION	211	-0.533404	-1.41184	0.001	0.18963
GO_NEGATIVE_REGULATION_OF_CHROMOSOME_ORGANIZATION	115	-0.546097	-1.41409	0.00813008	0.186411
GO_NEGATIVE_REGULATION_OF_STRESS_ACTIVATED_PROTEIN_KINASE_SIGNALING_CASCADE	36	-0.602624	-1.41461	0.048369	0.18576
GO_RESPONSE_TO_WOUNDING	434	-0.533742	-1.41478	0	0.185816
GO_DNA_GEOMETRIC_CHANGE	104	-0.554241	-1.4149	0.00810537	0.18593
GO_REGULATION_OF_DENDRITIC_SPINE_MORPHOGENESIS	35	-0.595615	-1.41493	0.0498866	0.186219
GO_SISTER_CHROMATID_COHESION	44	-0.596604	-1.41587	0.0430939	0.184906
GO_PROTEOGLYCAN_METABOLIC_PROCESS	62	-0.567831	-1.41655	0.0221987	0.183964
GO_REGULATION_OF_DENDRITE_MORPHOGENESIS	70	-0.559781	-1.41768	0.0261233	0.182645
GO_DNA_REPLICATION	243	-0.538386	-1.41778	0.001002	0.183148
GO_METENCEPHALON_DEVELOPMENT	68	-0.567557	-1.41795	0.019958	0.183205
GO_CELL_CYCLE_CHECKPOINT	193	-0.544927	-1.4182	0.00201005	0.183126
GO_POSITIVE_REGULATION_OF_OSTEOBLAST_DIFFERENTIATION	47	-0.578693	-1.41825	0.0464865	0.183402
GO_CORTICAL_CYTOSKELETON_ORGANIZATION	54	-0.578242	-1.41868	0.0249458	0.182941
GO_TRANSMEMBRANE_RECEPTOR_PROTEIN_SERINE_THREONINE_KINASE_SIGNALING_PATHWAY	230	-0.541227	-1.41956	0.00200602	0.181735
GO_FEMALE_SEX_DIFFERENTIATION	80	-0.553834	-1.42069	0.0208333	0.179997
GO_CYTOKINETIC_PROCESS	38	-0.608616	-1.42115	0.0342163	0.179783
GO_REGULATION_OF_CILIUM_ASSEMBLY	42	-0.59103	-1.42132	0.0322222	0.179839
GO_SEMAPHORIN_PLEXIN_SIGNALING_PATHWAY	32	-0.620154	-1.42139	0.0234467	0.18006
GO_SEX_DIFFERENTIATION	170	-0.543122	-1.42165	0.00502008	0.180309
GO_SPECIFICATION_OF_SYMMETRY	79	-0.558093	-1.42206	0.0165975	0.179876
GO_RESPONSE_TO_BMP	91	-0.555006	-1.42343	0.0174717	0.177672
GO_RESPONSE_TO_FIBROBLAST_GROWTH_FACTOR	88	-0.559403	-1.42562	0.0102354	0.174224
GO_REGULATION_OF_DENDRITIC_SPINE_DEVELOPMENT	58	-0.571216	-1.42671	0.0305907	0.172906
GO_NEGATIVE_REGULATION_OF_AXONOGENESIS	44	-0.595394	-1.42686	0.038961	0.172965
GO_REGULATION_OF_BMP_SIGNALING_PATHWAY	50	-0.585647	-1.42693	0.027027	0.173196
GO_REGULATION_OF_DNA_DEPENDENT_DNA_REPLICATION	47	-0.586579	-1.42824	0.0303688	0.171181
GO_POSITIVE_REGULATION_OF_REPRODUCTIVE_PROCESS	44	-0.594522	-1.42934	0.0349345	0.169533
GO_SEGMENTATION	57	-0.578003	-1.43007	0.027689	0.168671
GO_LAMELLIPODIUM_ORGANIZATION	66	-0.574795	-1.43012	0.0200634	0.168889
GO_MALE_SEX_DIFFERENTIATION	105	-0.557187	-1.43045	0.0030426	0.168899
GO_REGULATION_OF_BONE_MINERALIZATION	48	-0.585406	-1.43093	0.0272926	0.168369
GO_REPRODUCTIVE_SYSTEM_DEVELOPMENT	296	-0.539643	-1.43162	0	0.167811
GO_NEURON_PROJECTION_ORGANIZATION	68	-0.573604	-1.43177	0.0178571	0.167835
GO_ESTABLISHMENT_OF_PIGMENT_GRANULE_LOCALIZATION	21	-0.658221	-1.43332	0.0460772	0.166144
GO_PIGMENT_GRANULE_LOCALIZATION	23	-0.646951	-1.43376	0.040146	0.165696
GO_SPINDLE_ORGANIZATION	161	-0.553579	-1.43415	0.00100301	0.16529
GO_REGULATION_OF_OSSIFICATION	131	-0.555932	-1.43504	0.00504541	0.164087
GO_SMAD_PROTEIN_SIGNAL_TRANSDUCTION	47	-0.591498	-1.43529	0.0369565	0.164042
GO_HINDBRAIN_DEVELOPMENT	91	-0.560525	-1.43673	0.00825593	0.162568
GO_NEGATIVE_REGULATION_OF_WOUND_HEALING	49	-0.594737	-1.43695	0.0276596	0.162477
GO_SPINDLE_ASSEMBLY	101	-0.552962	-1.43702	0.0102669	0.162669
GO_REGULATION_OF_CELL_MORPHOGENESIS	369	-0.53789	-1.43711	0	0.162828
GO_NEGATIVE_REGULATION_OF_CELLULAR_COMPONENT_MOVEMENT	226	-0.544398	-1.43926	0	0.1594
GO_POSITIVE_REGULATION_OF_TELOMERASE_ACTIVITY	35	-0.610171	-1.43959	0.0380313	0.15918
GO_REGULATION_OF_NEURON_PROJECTION_REGENERATION	22	-0.658111	-1.43996	0.0439952	0.158841
GO_SCHWANN_CELL_DIFFERENTIATION	29	-0.631741	-1.44066	0.0328638	0.158343
GO_POSITIVE_REGULATION_OF_CELL_DIVISION	55	-0.579907	-1.44257	0.0221286	0.15579
GO_LYMPH_VESSEL_DEVELOPMENT	21	-0.655482	-1.44317	0.0435308	0.155134
GO_SPINDLE_LOCALIZATION	42	-0.608697	-1.44385	0.0255272	0.154269
GO_CENTRAL_NERVOUS_SYSTEM_PROJECTION_NEURON_AXONOGENESIS	19	-0.682738	-1.44544	0.0416157	0.151816
GO_ESTABLISHMENT_OF_EPITHELIAL_CELL_POLARITY	24	-0.643735	-1.44622	0.0496368	0.150804
GO_HETEROTYPIC_CELL_CELL_ADHESION	48	-0.603738	-1.4472	0.0262295	0.149545
GO_ROOF_OF_MOUTH_DEVELOPMENT	61	-0.588666	-1.4475	0.0158061	0.149425
GO_PATHWAY_RESTRICTED_SMAD_PROTEIN_PHOSPHORYLATION	41	-0.605475	-1.4493	0.0276549	0.146957
GO_REGULATION_OF_CELLULAR_RESPONSE_TO_GROWTH_FACTOR_STIMULUS	177	-0.553509	-1.44973	0	0.14659
GO_MEMBRANE_DISASSEMBLY	16	-0.695791	-1.44983	0.0418204	0.146749
GO_EMBRYONIC_EYE_MORPHOGENESIS	22	-0.652261	-1.45045	0.0468187	0.146117
GO_SPINAL_CORD_DEVELOPMENT	49	-0.59548	-1.45081	0.0139485	0.145834
GO_REGULATION_OF_T_CELL_APOPTOTIC_PROCESS	27	-0.638824	-1.4512	0.0361882	0.145455
GO_SOMITE_DEVELOPMENT	46	-0.598601	-1.45153	0.0287611	0.145271
GO_PEPTIDYL_TYROSINE_DEPHOSPHORYLATION	79	-0.567743	-1.452	0.0093361	0.144816
GO_MITOTIC_CELL_CYCLE_CHECKPOINT	148	-0.55418	-1.45267	0.00101215	0.144116
GO_REGULATION_OF_DENDRITE_DEVELOPMENT	113	-0.56033	-1.45348	0.00712831	0.143147
GO_REGULATION_OF_WNT_SIGNALING_PATHWAY	273	-0.548605	-1.45368	0	0.143152
GO_NEGATIVE_REGULATION_OF_CELLULAR_RESPONSE_TO_GROWTH_FACTOR_STIMULUS	103	-0.558833	-1.45381	0.00715746	0.143237
GO_PANCREAS_DEVELOPMENT	45	-0.599388	-1.45397	0.0286659	0.143294
GO_GLIAL_CELL_DIFFERENTIATION	146	-0.559203	-1.4552	0	0.141588
GO_EMBRYONIC_APPENDAGE_MORPHOGENESIS	70	-0.58184	-1.45541	0.0157563	0.141587
GO_LUNG_ALVEOLUS_DEVELOPMENT	28	-0.63087	-1.45616	0.039807	0.140952
GO_DENDRITE_DEVELOPMENT	179	-0.550563	-1.45652	0	0.140746
GO_ZYMOGEN_ACTIVATION	36	-0.627021	-1.45659	0.0385925	0.140949
GO_MEMBRANE_BIOGENESIS	29	-0.627586	-1.45683	0.0367816	0.140845
GO_NEGATIVE_REGULATION_OF_NERVOUS_SYSTEM_DEVELOPMENT	187	-0.552999	-1.4572	0	0.140567
GO_NEGATIVE_REGULATION_OF_T_CELL_DIFFERENTIATION	32	-0.632809	-1.45753	0.0263761	0.140394
GO_POSITIVE_REGULATION_OF_CELL_CYCLE_G2_M_PHASE_TRANSITION	27	-0.646739	-1.45778	0.035461	0.14035
GO_EMBRYO_DEVELOPMENT_ENDING_IN_BIRTH_OR_EGG_HATCHING	462	-0.548176	-1.45954	0	0.137903
GO_SENSORY_SYSTEM_DEVELOPMENT	231	-0.553153	-1.45955	0	0.138175
GO_EPITHELIAL_CELL_DIFFERENTIATION	398	-0.548131	-1.45961	0	0.138365
GO_RESPONSE_TO_ETHANOL	74	-0.58156	-1.4604	0.0125261	0.137438
GO_REGULATION_OF_OSTEOBLAST_DIFFERENTIATION	80	-0.574023	-1.46042	0.00838574	0.13772
GO_AMYLOID_PRECURSOR_PROTEIN_METABOLIC_PROCESS	55	-0.600387	-1.46051	0.00966702	0.137886
GO_FOLIC_ACID_CONTAINING_COMPOUND_METABOLIC_PROCESS	23	-0.665343	-1.46053	0.0314389	0.138154
GO_NEURON_MATURATION	32	-0.630907	-1.46141	0.0349887	0.136996
GO_REGULATION_OF_LAMELLIPODIUM_ASSEMBLY	26	-0.652519	-1.46181	0.0411765	0.136688
GO_CELLULAR_AMINO_ACID_BIOSYNTHETIC_PROCESS	58	-0.597214	-1.46201	0.0085197	0.136697
GO_MUSCLE_CELL_MIGRATION	68	-0.591933	-1.46231	0.00833333	0.136528
GO_HUMORAL_IMMUNE_RESPONSE_MEDIATED_BY_CIRCULATING_IMMUNOGLOBULIN	30	-0.638218	-1.46237	0.0234192	0.13676
GO_NERVE_DEVELOPMENT	39	-0.618927	-1.46261	0.0269058	0.136719
GO_STEM_CELL_DIFFERENTIATION	181	-0.555602	-1.46449	0.001	0.134377
GO_ORGANELLE_FISSION	355	-0.55421	-1.46489	0	0.134117
GO_BONE_DEVELOPMENT	142	-0.561239	-1.46574	0.00303951	0.133139
GO_PLACENTA_DEVELOPMENT	111	-0.562762	-1.46665	0.00203252	0.132012
GO_POSITIVE_REGULATION_OF_MITOTIC_CELL_CYCLE	134	-0.558794	-1.46665	0.00203252	0.132302
GO_POSITIVE_REGULATION_OF_CELL_GROWTH	120	-0.564389	-1.46723	0.00202634	0.131614
GO_CELL_CELL_JUNCTION_ASSEMBLY	91	-0.58189	-1.46735	0.00412797	0.131765
GO_ACTIN_MEDIATED_CELL_CONTRACTION	66	-0.582312	-1.46765	0.012513	0.131573
GO_CAMERA_TYPE_EYE_DEVELOPMENT	195	-0.559307	-1.46776	0	0.13172
GO_DOPAMINE_TRANSPORT	16	-0.696964	-1.46824	0.0379747	0.131293
GO_FOREBRAIN_DEVELOPMENT	240	-0.553625	-1.46828	0	0.131523
GO_NEGATIVE_REGULATION_OF_SMOOTH_MUSCLE_CELL_MIGRATION	21	-0.670687	-1.46835	0.0409429	0.131729
GO_POSITIVE_REGULATION_OF_FIBROBLAST_PROLIFERATION	41	-0.609611	-1.46858	0.0175631	0.131681
GO_NEGATIVE_REGULATION_OF_LYMPHOCYTE_DIFFERENTIATION	36	-0.624793	-1.46932	0.0233853	0.130812
GO_CELL_DIVISION	483	-0.55106	-1.46947	0	0.130905
GO_NEGATIVE_REGULATION_OF_AXON_EXTENSION	28	-0.641769	-1.47121	0.0314389	0.128978
GO_POSITIVE_REGULATION_OF_SMOOTHENED_SIGNALING_PATHWAY	23	-0.661567	-1.47174	0.0294118	0.128502
GO_OLFACTORY_LOBE_DEVELOPMENT	18	-0.689492	-1.47175	0.0426829	0.128793
GO_PTERIDINE_CONTAINING_COMPOUND_METABOLIC_PROCESS	29	-0.642281	-1.47335	0.0329412	0.126572
GO_MITOTIC_G2_M_TRANSITION_CHECKPOINT	26	-0.653531	-1.47443	0.0358852	0.125223
GO_NUCLEAR_MIGRATION	23	-0.661951	-1.47453	0.0361011	0.125386
GO_GLAND_DEVELOPMENT	297	-0.559301	-1.47479	0	0.125299
GO_CENTRAL_NERVOUS_SYSTEM_NEURON_DIFFERENTIATION	102	-0.573359	-1.47496	0.00720906	0.125357
GO_POSITIVE_REGULATION_OF_MACROPHAGE_MIGRATION	20	-0.680951	-1.47523	0.0298686	0.125288
GO_HEART_MORPHOGENESIS	161	-0.564636	-1.47537	0.00100705	0.125419
GO_MUSCLE_CELL_DIFFERENTIATION	233	-0.558956	-1.47561	0	0.125354
GO_REGULATION_OF_RESPONSE_TO_WOUNDING	122	-0.567391	-1.47634	0.0010142	0.124585
GO_PROTEIN_CATABOLIC_PROCESS_IN_THE_VACUOLE	17	-0.702911	-1.47638	0.0384139	0.124853
GO_CRANIAL_NERVE_DEVELOPMENT	25	-0.65356	-1.4772	0.0264741	0.123997
GO_NEGATIVE_REGULATION_OF_CHEMOTAXIS	44	-0.608712	-1.4773	0.0206972	0.124154
GO_AUTONOMIC_NERVOUS_SYSTEM_DEVELOPMENT	21	-0.675419	-1.47736	0.0318237	0.124357
GO_REGULATION_OF_TRANSMEMBRANE_RECEPTOR_PROTEIN_SERINE_THREONINE_KINASE_SIGNALING_PATHWAY	155	-0.568226	-1.47768	0	0.124183
GO_NEGATIVE_REGULATION_OF_EPITHELIAL_CELL_PROLIFERATION	88	-0.582105	-1.47818	0.0030896	0.123747
GO_FIBROBLAST_GROWTH_FACTOR_RECEPTOR_SIGNALING_PATHWAY	68	-0.583213	-1.47837	0.0125918	0.123744
GO_AXIS_SPECIFICATION	45	-0.610218	-1.4788	0.0186403	0.12342
GO_AMINOGLYCAN_CATABOLIC_PROCESS	44	-0.613702	-1.47918	0.0178174	0.123163
GO_POSITIVE_REGULATION_OF_MITOTIC_NUCLEAR_DIVISION	45	-0.615498	-1.48016	0.0122222	0.122057
GO_SYNAPTIC_TRANSMISSION_GABAERGIC	20	-0.676443	-1.48049	0.0317073	0.121912
GO_MITOTIC_G2_DNA_DAMAGE_CHECKPOINT	19	-0.681467	-1.48077	0.0353659	0.121785
GO_ASPARTATE_FAMILY_AMINO_ACID_METABOLIC_PROCESS	35	-0.635839	-1.48079	0.0157835	0.122055
GO_POSITIVE_REGULATION_OF_EPITHELIAL_TO_MESENCHYMAL_TRANSITION	40	-0.622553	-1.48156	0.0273224	0.121155
GO_ACTOMYOSIN_STRUCTURE_ORGANIZATION	146	-0.567136	-1.48156	0	0.121459
GO_STEM_CELL_DIVISION	35	-0.63498	-1.48212	0.0194731	0.121019
GO_EMBRYONIC_HEART_TUBE_MORPHOGENESIS	45	-0.611137	-1.48283	0.0221484	0.120288
GO_POSITIVE_REGULATION_OF_CARDIOCYTE_DIFFERENTIATION	22	-0.681845	-1.4829	0.0290909	0.120477
GO_MEIOSIS_I_CELL_CYCLE_PROCESS	70	-0.597904	-1.48295	0.00843882	0.1207
GO_NEGATIVE_REGULATION_OF_EPITHELIAL_CELL_MIGRATION	53	-0.606047	-1.48336	0.0140086	0.120424
GO_PEPTIDE_CROSS_LINKING	16	-0.705299	-1.48392	0.0358515	0.119895
GO_NEURON_PROJECTION_EXTENSION	119	-0.571224	-1.48393	0.00101729	0.120189
GO_ANION_HOMEOSTASIS	37	-0.630325	-1.48414	0.0258137	0.120198
GO_HEART_DEVELOPMENT	383	-0.558463	-1.48465	0	0.119796
GO_POSITIVE_REGULATION_OF_SYNAPSE_ASSEMBLY	25	-0.666393	-1.48533	0.0315789	0.119125
GO_POSITIVE_REGULATION_OF_CARTILAGE_DEVELOPMENT	22	-0.680103	-1.48607	0.0207065	0.118413
GO_EXTRACELLULAR_MATRIX_DISASSEMBLY	53	-0.603845	-1.48701	0.0139935	0.117291
GO_SARCOMERE_ORGANIZATION	21	-0.681884	-1.48731	0.0279465	0.117196
GO_TELENCEPHALON_DEVELOPMENT	167	-0.566657	-1.4876	0	0.11709
GO_VASCULAR_ENDOTHELIAL_GROWTH_FACTOR_SIGNALING_PATHWAY	27	-0.658582	-1.48764	0.0229885	0.117364
GO_CELL_FATE_COMMITMENT_INVOLVED_IN_FORMATION_OF_PRIMARY_GERM_LAYER	16	-0.715635	-1.48951	0.0391134	0.114948
GO_RESPONSE_TO_CORTICOSTEROID	109	-0.577515	-1.48985	0.00406504	0.114781
GO_RESPONSE_TO_X_RAY	29	-0.663666	-1.49006	0.0176678	0.114813
GO_REGULATION_OF_TRANSCRIPTION_INVOLVED_IN_G1_S_TRANSITION_OF_MITOTIC_CELL_CYCLE	30	-0.648106	-1.49095	0.0277136	0.11383
GO_EMBRYONIC_HEART_TUBE_DEVELOPMENT	51	-0.613836	-1.49112	0.0152505	0.113889
GO_ESTABLISHMENT_OF_TISSUE_POLARITY	106	-0.579234	-1.49175	0.00407332	0.113331
GO_HOMOTYPIC_CELL_CELL_ADHESION	63	-0.601085	-1.49368	0.00740741	0.110905
GO_SUBSTRATE_ADHESION_DEPENDENT_CELL_SPREADING	85	-0.582249	-1.49387	0.00103627	0.110972
GO_REGULATION_OF_AXON_GUIDANCE	32	-0.640253	-1.49422	0.0251142	0.110748
GO_LYMPH_VESSEL_MORPHOGENESIS	16	-0.707967	-1.49455	0.0291139	0.110629
GO_MEIOTIC_CELL_CYCLE	155	-0.571557	-1.49487	0	0.110502
GO_MUSCLE_STRUCTURE_DEVELOPMENT	421	-0.562601	-1.49544	0	0.110036
GO_TOLERANCE_INDUCTION	17	-0.704637	-1.49685	0.0373134	0.108355
GO_NEGATIVE_REGULATION_OF_BMP_SIGNALING_PATHWAY	28	-0.657325	-1.4976	0.0185185	0.10767
GO_REGULATION_OF_NEURON_PROJECTION_DEVELOPMENT	350	-0.563697	-1.49812	0	0.107239
GO_HIPPOCAMPUS_DEVELOPMENT	53	-0.612972	-1.49845	0.0074389	0.1071
GO_NEUROBLAST_PROLIFERATION	36	-0.632159	-1.49864	0.025	0.107162
GO_T_CELL_APOPTOTIC_PROCESS	40	-0.62865	-1.49911	0.012318	0.106795
GO_NEGATIVE_REGULATION_OF_CELL_DEVELOPMENT	199	-0.565274	-1.50014	0	0.10571
GO_CRANIAL_NERVE_MORPHOGENESIS	15	-0.715242	-1.50074	0.0312907	0.105285
GO_REGULATION_OF_CARDIAC_MUSCLE_CELL_ACTION_POTENTIAL	23	-0.68196	-1.50572	0.0299043	0.0991082
GO_ACTIN_FILAMENT_BASED_MOVEMENT	93	-0.596978	-1.5074	0.00205128	0.0971814
GO_OSSIFICATION	269	-0.569638	-1.50909	0	0.0952819
GO_NEPHRON_DEVELOPMENT	81	-0.590486	-1.5094	0.00311526	0.095164
GO_POSITIVE_REGULATION_OF_NERVOUS_SYSTEM_DEVELOPMENT	338	-0.570505	-1.50945	0	0.0953458
GO_REGULATION_OF_NEURON_DIFFERENTIATION	431	-0.567166	-1.51297	0	0.0914609
GO_POSITIVE_REGULATION_OF_DENDRITE_DEVELOPMENT	54	-0.621074	-1.51351	0.00968784	0.0910637
GO_MORPHOGENESIS_OF_A_POLARIZED_EPITHELIUM	122	-0.575643	-1.51356	0	0.0912564
GO_MESODERMAL_CELL_DIFFERENTIATION	18	-0.714351	-1.5139	0.0195838	0.0911519
GO_NEGATIVE_REGULATION_OF_NEURON_DIFFERENTIATION	138	-0.578667	-1.5156	0.00100402	0.0894495
GO_CEREBELLAR_CORTEX_MORPHOGENESIS	20	-0.713974	-1.51667	0.0242131	0.0885156
GO_METANEPHRIC_NEPHRON_DEVELOPMENT	21	-0.704502	-1.51723	0.0204082	0.0881382
GO_CHROMOSOME_SEGREGATION	266	-0.572473	-1.51723	0	0.0883815
GO_CARDIAC_CELL_DEVELOPMENT	53	-0.623568	-1.51736	0.00319829	0.088511
GO_DNA_STRAND_ELONGATION_INVOLVED_IN_DNA_REPLICATION	19	-0.711755	-1.51738	0.0224439	0.0887487
GO_STRIATED_MUSCLE_CELL_DIFFERENTIATION	174	-0.581692	-1.5177	0	0.088667
GO_DNA_STRAND_ELONGATION	24	-0.673719	-1.51818	0.0179641	0.0883116
GO_KINETOCHORE_ASSEMBLY	15	-0.728088	-1.51834	0.0269576	0.0883476
GO_REGULATION_OF_CELL_PROJECTION_ORGANIZATION	490	-0.570721	-1.51997	0	0.0867029
GO_ACUTE_PHASE_RESPONSE	24	-0.679265	-1.52019	0.014068	0.0866768
GO_ALPHA_AMINO_ACID_BIOSYNTHETIC_PROCESS	52	-0.620798	-1.52182	0.00865801	0.0850306
GO_POSITIVE_REGULATION_OF_MACROPHAGE_CHEMOTAXIS	15	-0.733452	-1.52199	0.0256082	0.0850709
GO_REGULATION_OF_CARTILAGE_DEVELOPMENT	40	-0.639939	-1.52406	0.019037	0.0830117
GO_NEURON_PROJECTION_EXTENSION_INVOLVED_IN_NEURON_PROJECTION_GUIDANCE	29	-0.670832	-1.52499	0.0131579	0.0822622
GO_CELL_FATE_COMMITMENT	121	-0.585737	-1.52584	0.00100908	0.0816219
GO_REGULATION_OF_EPIDERMIS_DEVELOPMENT	53	-0.625162	-1.52589	0.00527983	0.0818191
GO_NEURON_PROJECTION_REGENERATION	39	-0.644618	-1.52632	0.0142857	0.0815939
GO_EPITHELIAL_CELL_DIFFERENTIATION_INVOLVED_IN_KIDNEY_DEVELOPMENT	30	-0.668888	-1.52675	0.00921659	0.0813344
GO_REGULATION_OF_LAMELLIPODIUM_ORGANIZATION	35	-0.644535	-1.52711	0.0078125	0.0811378
GO_REGULATION_OF_HUMORAL_IMMUNE_RESPONSE	42	-0.632247	-1.52804	0.0111732	0.0803499
GO_REGULATION_OF_POSTSYNAPSE_ORGANIZATION	69	-0.610915	-1.52827	0.00314795	0.080332
GO_REGULATION_OF_CELL_SIZE	136	-0.590173	-1.52904	0	0.079774
GO_SKELETAL_SYSTEM_DEVELOPMENT	312	-0.574069	-1.52977	0	0.0792238
GO_LIMBIC_SYSTEM_DEVELOPMENT	66	-0.613597	-1.53033	0.0042061	0.0788779
GO_CENTROMERE_COMPLEX_ASSEMBLY	36	-0.637721	-1.53044	0.0113122	0.0789893
GO_APPENDAGE_DEVELOPMENT	103	-0.598211	-1.53093	0	0.0787033
GO_DEVELOPMENTAL_GROWTH	431	-0.577893	-1.53247	0	0.0773502
GO_SMOOTH_MUSCLE_CELL_MIGRATION	59	-0.617459	-1.5334	0.00318471	0.0765714
GO_NEURAL_TUBE_DEVELOPMENT	126	-0.587542	-1.53455	0.00101523	0.0756226
GO_AORTA_DEVELOPMENT	44	-0.636017	-1.53534	0.00666667	0.0750532
GO_CEREBELLAR_CORTEX_DEVELOPMENT	33	-0.655604	-1.53693	0.0113379	0.0736429
GO_HETEROPHILIC_CELL_CELL_ADHESION_VIA_PLASMA_MEMBRANE_CELL_ADHESION_MOLECULES	25	-0.68263	-1.53694	0.0191847	0.073854
GO_POSITIVE_REGULATION_OF_PEPTIDYL_THREONINE_PHOSPHORYLATION	22	-0.685981	-1.53763	0.0184049	0.0734116
GO_REGULATION_OF_CELL_FATE_COMMITMENT	15	-0.738339	-1.53799	0.0189394	0.0732946
GO_REGULATION_OF_SUBSTRATE_ADHESION_DEPENDENT_CELL_SPREADING	42	-0.640167	-1.53861	0.00110011	0.0729005
GO_REGULATION_OF_EXTRACELLULAR_MATRIX_ORGANIZATION	31	-0.665847	-1.53896	0.0183908	0.0727401
GO_EMBRYONIC_PLACENTA_DEVELOPMENT	63	-0.617573	-1.54004	0.00527983	0.0718671
GO_HOMOLOGOUS_RECOMBINATION	34	-0.674544	-1.541	0.00695249	0.0711733
GO_FOREBRAIN_CELL_MIGRATION	37	-0.649085	-1.5418	0.0113895	0.0706057
GO_NEURAL_TUBE_FORMATION	88	-0.599225	-1.542	0.00412797	0.0706329
GO_AXON_EXTENSION	92	-0.603398	-1.54231	0.00102564	0.0705496
GO_LYSOSOMAL_PROTEIN_CATABOLIC_PROCESS	15	-0.743877	-1.54405	0.0141026	0.0689964
GO_NEGATIVE_CHEMOTAXIS	34	-0.663656	-1.54429	0.00691244	0.0689523
GO_METANEPHRIC_EPITHELIUM_DEVELOPMENT	15	-0.752458	-1.54599	0.0101781	0.0674195
GO_REGULATION_OF_SYNAPSE_STRUCTURE_OR_ACTIVITY	144	-0.594688	-1.54655	0.00100705	0.0670627
GO_DEVELOPMENTAL_CELL_GROWTH	156	-0.587704	-1.54673	0	0.067067
GO_CHROMOSOME_LOCALIZATION	68	-0.616789	-1.54675	0.00315457	0.0672731
GO_MAGNESIUM_ION_TRANSPORT	16	-0.746191	-1.54875	0.0150943	0.0657062
GO_POSITIVE_REGULATION_OF_AXON_EXTENSION	34	-0.662849	-1.5497	0.00564334	0.0651174
GO_SMOOTHENED_SIGNALING_PATHWAY	98	-0.606194	-1.55125	0.00102145	0.0639279
GO_MORPHOGENESIS_OF_AN_EPITHELIUM	389	-0.58315	-1.55128	0	0.0641199
GO_CELLULAR_COMPONENT_ASSEMBLY_INVOLVED_IN_MORPHOGENESIS	68	-0.616965	-1.5515	0.00104822	0.0641079
GO_OUTFLOW_TRACT_MORPHOGENESIS	51	-0.646962	-1.55275	0.00322928	0.0631147
GO_MITOTIC_SPINDLE_ASSEMBLY	58	-0.626468	-1.55291	0.00534759	0.0631526
GO_REGULATION_OF_CARDIOCYTE_DIFFERENTIATION	39	-0.652301	-1.55301	0.0109409	0.0633133
GO_REGULATION_OF_CELL_PROJECTION_ASSEMBLY	139	-0.597815	-1.55349	0	0.0630742
GO_MICROTUBULE_CYTOSKELETON_ORGANIZATION_INVOLVED_IN_MITOSIS	128	-0.594809	-1.55355	0	0.0632357
GO_POSITIVE_REGULATION_OF_CELL_PROJECTION_ORGANIZATION	276	-0.586588	-1.55468	0	0.0623693
GO_POSITIVE_REGULATION_OF_NEURON_DIFFERENTIATION	242	-0.586949	-1.55527	0	0.0620321
GO_POSITIVE_REGULATION_OF_KIDNEY_DEVELOPMENT	21	-0.717721	-1.55598	0.00730816	0.0616317
GO_CARDIAC_MUSCLE_CELL_DIFFERENTIATION	75	-0.617801	-1.55662	0.00209424	0.0613026
GO_MITOTIC_METAPHASE_PLATE_CONGRESSION	45	-0.637088	-1.55673	0.0032967	0.0614444
GO_EMBRYONIC_PLACENTA_MORPHOGENESIS	17	-0.745958	-1.55683	0.0138018	0.0615907
GO_UROGENITAL_SYSTEM_DEVELOPMENT	215	-0.591617	-1.55689	0	0.0617801
GO_EMBRYONIC_CAMERA_TYPE_EYE_MORPHOGENESIS	17	-0.724797	-1.55699	0.0152478	0.061893
GO_REGULATION_OF_HAIR_CYCLE	16	-0.747051	-1.55709	0.0138714	0.0620226
GO_CELL_CYCLE_DNA_REPLICATION	60	-0.638356	-1.55843	0.00107296	0.0609937
GO_REGULATION_OF_HEART_MORPHOGENESIS	23	-0.697545	-1.55867	0.0157195	0.0609764
GO_NEURAL_PRECURSOR_CELL_PROLIFERATION	92	-0.611673	-1.55905	0.00311526	0.0607747
GO_CEREBRAL_CORTEX_CELL_MIGRATION	28	-0.676575	-1.55926	0.00936768	0.0608127
GO_REGULATION_OF_HIPPO_SIGNALING	16	-0.740072	-1.55978	0.0127877	0.0605852
GO_CHROMOSOME_CONDENSATION	27	-0.692304	-1.56112	0.00807382	0.0595953
GO_CELL_JUNCTION_ASSEMBLY	267	-0.589397	-1.56126	0	0.0596732
GO_DORSAL_VENTRAL_PATTERN_FORMATION	38	-0.654683	-1.56174	0.00666667	0.0594559
GO_GASTRULATION	127	-0.599882	-1.56175	0	0.0596586
GO_FOREBRAIN_NEURON_DIFFERENTIATION	26	-0.695245	-1.56177	0.0071599	0.0598358
GO_MAMMARY_GLAND_DEVELOPMENT	95	-0.60604	-1.5621	0	0.0597631
GO_REGULATION_OF_EPITHELIAL_TO_MESENCHYMAL_TRANSITION	69	-0.619461	-1.56244	0.00105485	0.0597341
GO_REGULATION_OF_MEIOTIC_NUCLEAR_DIVISION	16	-0.759058	-1.56354	0.0127389	0.0589076
GO_SENSORY_ORGAN_DEVELOPMENT	326	-0.588658	-1.56384	0	0.0588785
GO_RESPONSE_TO_AXON_INJURY	51	-0.645202	-1.56458	0.00432432	0.0585016
GO_REGULATION_OF_PEPTIDYL_THREONINE_PHOSPHORYLATION	35	-0.662533	-1.5659	0.004561	0.0575368
GO_TISSUE_MORPHOGENESIS	447	-0.587514	-1.5661	0	0.05761
GO_REGIONALIZATION	182	-0.599566	-1.56681	0	0.0572376
GO_CELL_DIFFERENTIATION_INVOLVED_IN_EMBRYONIC_PLACENTA_DEVELOPMENT	18	-0.732564	-1.56693	0.00517464	0.0573556
GO_EMBRYONIC_MORPHOGENESIS	364	-0.593172	-1.56702	0	0.0574921
GO_REGULATION_OF_REPRODUCTIVE_PROCESS	89	-0.612089	-1.56819	0.00102987	0.0566811
GO_MEIOTIC_CHROMOSOME_SEGREGATION	51	-0.643027	-1.56842	0.0010661	0.0566819
GO_ARTERY_MORPHOGENESIS	41	-0.653198	-1.5686	0.00330761	0.0567177
GO_SUBSTRATE_DEPENDENT_CELL_MIGRATION	23	-0.715556	-1.56885	0.00720288	0.0566896
GO_APPENDAGE_MORPHOGENESIS	84	-0.614897	-1.56897	0.00102669	0.0568047
GO_POSITIVE_REGULATION_OF_GROWTH	178	-0.603216	-1.56963	0	0.0564895
GO_NEGATIVE_REGULATION_OF_REPRODUCTIVE_PROCESS	34	-0.676319	-1.56973	0.0078125	0.0566083
GO_MITOTIC_NUCLEAR_DIVISION	242	-0.591148	-1.57024	0	0.056467
GO_FOREBRAIN_NEURON_DEVELOPMENT	16	-0.744412	-1.57104	0.0103896	0.0560261
GO_POSITIVE_REGULATION_OF_CELL_CYCLE_PHASE_TRANSITION	83	-0.618443	-1.57313	0	0.0544357
GO_RETINA_DEVELOPMENT_IN_CAMERA_TYPE_EYE	83	-0.611261	-1.574	0.00103306	0.0539655
GO_ESTABLISHMENT_OR_MAINTENANCE_OF_MONOPOLAR_CELL_POLARITY	17	-0.741343	-1.57449	0.0125628	0.0537014
GO_PROTEIN_LOCALIZATION_TO_KINETOCHORE	16	-0.746225	-1.57467	0.00747198	0.0537824
GO_DNA_UNWINDING_INVOLVED_IN_DNA_REPLICATION	15	-0.748003	-1.57476	0.0158103	0.053912
GO_LUNG_MORPHOGENESIS	32	-0.677983	-1.57485	0.00897868	0.0540465
GO_PERIPHERAL_NERVOUS_SYSTEM_DEVELOPMENT	42	-0.654847	-1.57546	0.00437637	0.0537638
GO_NEGATIVE_REGULATION_OF_CELL_MORPHOGENESIS_INVOLVED_IN_DIFFERENTIATION	66	-0.629646	-1.57568	0.00520833	0.0537715
GO_DNA_DEPENDENT_DNA_REPLICATION	136	-0.602981	-1.57663	0	0.0531192
GO_MUSCLE_ORGAN_DEVELOPMENT	242	-0.597774	-1.57672	0	0.0532755
GO_NUCLEAR_CHROMOSOME_SEGREGATION	209	-0.595534	-1.57707	0	0.0532127
GO_ADHERENS_JUNCTION_ORGANIZATION	42	-0.656609	-1.5774	0.00436681	0.0532219
GO_CELL_SURFACE_RECEPTOR_SIGNALING_PATHWAY_INVOLVED_IN_HEART_DEVELOPMENT	17	-0.676657	-1.46975	0.0542929	0.1308
GO_OSTEOBLAST_DIFFERENTIATION	149	-0.606864	-1.57795	0	0.052932
GO_ENDOCHONDRAL_BONE_MORPHOGENESIS	36	-0.669823	-1.57923	0.00340909	0.0520551
GO_CELL_MORPHOGENESIS_INVOLVED_IN_NEURON_DIFFERENTIATION	399	-0.59463	-1.58095	0	0.0508657
GO_ANTERIOR_POSTERIOR_PATTERN_SPECIFICATION	111	-0.612375	-1.58181	0	0.050458
GO_CONNECTIVE_TISSUE_DEVELOPMENT	164	-0.608399	-1.58206	0	0.0504636
GO_OUTFLOW_TRACT_SEPTUM_MORPHOGENESIS	18	-0.754353	-1.58211	0.00855746	0.0506297
GO_COCHLEA_DEVELOPMENT	24	-0.713968	-1.58289	0.00848485	0.0502115
GO_REGULATION_OF_CELL_MORPHOGENESIS_INVOLVED_IN_DIFFERENTIATION	218	-0.603178	-1.58304	0	0.0502714
GO_THYMOCYTE_APOPTOTIC_PROCESS	15	-0.762449	-1.58586	0.0101523	0.0482745
GO_NEURON_MIGRATION	100	-0.614953	-1.586	0	0.0483902
GO_PROSTATE_GLAND_DEVELOPMENT	34	-0.68112	-1.58615	0.00673401	0.0485468
GO_REGULATION_OF_ACTIN_FILAMENT_BASED_MOVEMENT	30	-0.691017	-1.58617	0.0115075	0.0487529
GO_EXCRETION	30	-0.689313	-1.58661	0.0046083	0.0486305
GO_BONE_MINERALIZATION	76	-0.639344	-1.58783	0	0.0479398
GO_FOREBRAIN_GENERATION_OF_NEURONS	32	-0.686288	-1.5882	0.00566251	0.0479062
GO_SYNAPSE_MATURATION	17	-0.687766	-1.4627	0.0530973	0.1369
GO_NEURAL_CREST_CELL_DIFFERENTIATION	57	-0.644297	-1.58844	0.00106838	0.0479213
GO_VENTRICULAR_SEPTUM_MORPHOGENESIS	32	-0.683461	-1.58997	0.00348837	0.0469966
GO_CELL_PART_MORPHOGENESIS	468	-0.59545	-1.59039	0	0.0468427
GO_POSITIVE_REGULATION_OF_NEURON_PROJECTION_DEVELOPMENT	200	-0.603985	-1.59078	0	0.046741
GO_FILOPODIUM_ASSEMBLY	46	-0.658507	-1.59261	0.00215054	0.0455581
GO_NEGATIVE_REGULATION_OF_RESPONSE_TO_WOUNDING	60	-0.645005	-1.59263	0.0021164	0.045755
GO_CHONDROCYTE_DIFFERENTIATION	66	-0.63539	-1.59274	0	0.0458824
GO_MITOTIC_SPINDLE_ORGANIZATION	105	-0.612976	-1.59371	0	0.0453118
GO_DNA_REPLICATION_CHECKPOINT	16	-0.756595	-1.59426	0.00788436	0.0451414
GO_EPITHELIAL_TO_MESENCHYMAL_TRANSITION	101	-0.618536	-1.59591	0	0.0441658
GO_GASTRULATION_WITH_MOUTH_FORMING_SECOND	19	-0.737282	-1.59604	0.00872818	0.0442754
GO_METAPHASE_PLATE_CONGRESSION	57	-0.645529	-1.59637	0	0.0442871
GO_REGULATION_OF_ANIMAL_ORGAN_FORMATION	17	-0.755506	-1.59681	0.00887199	0.0441951
GO_MEIOTIC_CELL_CYCLE_PROCESS	115	-0.618812	-1.59796	0	0.043552
GO_NEPHRON_EPITHELIUM_DEVELOPMENT	56	-0.650934	-1.59876	0.00107875	0.0431426
GO_CARTILAGE_DEVELOPMENT_INVOLVED_IN_ENDOCHONDRAL_BONE_MORPHOGENESIS	19	-0.73993	-1.59936	0.00741656	0.0429656
GO_INSULIN_LIKE_GROWTH_FACTOR_RECEPTOR_SIGNALING_PATHWAY	25	-0.715135	-1.60012	0.00352113	0.042602
GO_CELL_ADHESION_MEDIATED_BY_INTEGRIN	56	-0.644989	-1.60151	0.0021575	0.0418818
GO_CENTRAL_NERVOUS_SYSTEM_NEURON_DEVELOPMENT	52	-0.648662	-1.60237	0	0.0415631
GO_MESENCHYMAL_CELL_DIFFERENTIATION	148	-0.615049	-1.60305	0	0.0411924
GO_REGULATION_OF_MACROPHAGE_DIFFERENTIATION	17	-0.681287	-1.4558	0.0526976	0.141251
GO_G2_DNA_DAMAGE_CHECKPOINT	28	-0.700402	-1.6037	0.00693642	0.0409032
GO_EPITHELIAL_TUBE_MORPHOGENESIS	223	-0.610371	-1.60465	0	0.0404489
GO_NEGATIVE_REGULATION_OF_STRIATED_MUSCLE_CELL_APOPTOTIC_PROCESS	17	-0.748517	-1.60694	0.01868	0.039072
GO_REGULATION_OF_CHONDROCYTE_DIFFERENTIATION	29	-0.707506	-1.60744	0.00921659	0.038918
GO_MITOTIC_SISTER_CHROMATID_SEGREGATION	146	-0.617872	-1.60782	0	0.038904
GO_ATTACHMENT_OF_MITOTIC_SPINDLE_MICROTUBULES_TO_KINETOCHORE	15	-0.783727	-1.6083	0.00645161	0.0388399
GO_TISSUE_REGENERATION	43	-0.664978	-1.60848	0.00332963	0.0389546
GO_SISTER_CHROMATID_SEGREGATION	169	-0.617745	-1.60863	0	0.0390381
GO_ENDODERM_DEVELOPMENT	55	-0.654467	-1.6089	0.00107296	0.0390529
GO_VENTRICULAR_SEPTUM_DEVELOPMENT	53	-0.650224	-1.61013	0	0.0384823
GO_RENAL_TUBULE_DEVELOPMENT	45	-0.669246	-1.61042	0.00441989	0.0385177
GO_MOTOR_NEURON_AXON_GUIDANCE	20	-0.731618	-1.61046	0.00610501	0.0386813
GO_MESENCHYME_DEVELOPMENT	176	-0.61688	-1.61213	0	0.0376954
GO_APOPTOTIC_PROCESS_INVOLVED_IN_MORPHOGENESIS	17	-0.755972	-1.61224	0.00992556	0.0378084
GO_RESPONSE_TO_VITAMIN	61	-0.648695	-1.61234	0.00106383	0.0379323
GO_REGULATION_OF_STEM_CELL_POPULATION_MAINTENANCE	25	-0.72138	-1.61248	0.00358852	0.0380287
GO_REGULATION_OF_MESENCHYMAL_CELL_PROLIFERATION	19	-0.75633	-1.61273	0.00627353	0.0380529
GO_EPITHELIAL_TUBE_BRANCHING_INVOLVED_IN_LUNG_MORPHOGENESIS	18	-0.762405	-1.61364	0.00252525	0.0376575
GO_REGULATION_OF_DEVELOPMENTAL_GROWTH	220	-0.611931	-1.61433	0	0.0373908
GO_REGULATION_OF_MORPHOGENESIS_OF_AN_EPITHELIUM	138	-0.62277	-1.61437	0	0.037565
GO_DNA_REPLICATION_INITIATION	37	-0.694047	-1.61473	0.00110865	0.0375328
GO_REGULATION_OF_AXONOGENESIS	127	-0.625213	-1.61497	0	0.0375255
GO_INTESTINAL_EPITHELIAL_CELL_DIFFERENTIATION	15	-0.694962	-1.44177	0.0538058	0.156816
GO_CARDIAC_VENTRICLE_MORPHOGENESIS	41	-0.682365	-1.61567	0.00221729	0.0373175
GO_MYELIN_ASSEMBLY	18	-0.67087	-1.44033	0.0555556	0.158541
GO_BRANCHING_INVOLVED_IN_MAMMARY_GLAND_DUCT_MORPHOGENESIS	19	-0.739526	-1.61606	0.00496894	0.0372736
GO_AXON_DEVELOPMENT	340	-0.606835	-1.61608	0	0.0374671
GO_KINETOCHORE_ORGANIZATION	20	-0.740192	-1.61631	0.00618047	0.0375203
GO_NEGATIVE_REGULATION_OF_MUSCLE_CELL_APOPTOTIC_PROCESS	25	-0.718577	-1.61711	0	0.0371896
GO_POSITIVE_REGULATION_OF_NUCLEAR_DIVISION	50	-0.661994	-1.61716	0.00218341	0.0373549
GO_CHONDROCYTE_DEVELOPMENT	20	-0.74352	-1.61801	0.00970874	0.0370923
GO_REGULATION_OF_NUCLEAR_DIVISION	151	-0.621539	-1.61826	0	0.0371182
GO_MITOTIC_DNA_REPLICATION	15	-0.705799	-1.43614	0.0610687	0.163253
GO_MITOTIC_CHROMOSOME_CONDENSATION	15	-0.680983	-1.43554	0.0716113	0.163961
GO_CELL_DIFFERENTIATION_INVOLVED_IN_KIDNEY_DEVELOPMENT	35	-0.69063	-1.61896	0.00346821	0.036841
GO_POSITIVE_REGULATION_OF_CHROMOSOME_SEGREGATION	30	-0.699982	-1.61902	0.00346821	0.0370027
GO_MYOFIBRIL_ASSEMBLY	37	-0.684112	-1.62045	0.00775194	0.0362447
GO_MESENCHYMAL_CELL_PROLIFERATION	23	-0.732597	-1.62267	0.00595238	0.0350141
GO_POSITIVE_REGULATION_OF_CHROMOSOME_SEPARATION	15	-0.782773	-1.62334	0.00254777	0.0347983
GO_POSITIVE_REGULATION_OF_BONE_MINERALIZATION	28	-0.623051	-1.4329	0.0550351	0.166538
GO_POSITIVE_REGULATION_OF_MITOTIC_SISTER_CHROMATID_SEGREGATION	19	-0.661757	-1.4328	0.0707071	0.166371
GO_TRANSCYTOSIS	19	-0.763938	-1.62478	0.00379267	0.0341871
GO_CELL_PROLIFERATION_IN_FOREBRAIN	17	-0.786516	-1.62623	0.00252207	0.0335358
GO_TRANSFORMING_GROWTH_FACTOR_BETA_PRODUCTION	30	-0.619851	-1.43098	0.0512528	0.168585
GO_POSITIVE_REGULATION_OF_STEM_CELL_PROLIFERATION	27	-0.713537	-1.62684	0.00235294	0.0334113
GO_CARDIAC_SEPTUM_MORPHOGENESIS	53	-0.660287	-1.62719	0.00323625	0.0334059
GO_NEGATIVE_REGULATION_OF_EPITHELIAL_TO_MESENCHYMAL_TRANSITION	23	-0.642366	-1.43024	0.05	0.168997
GO_RESPONSE_TO_VITAMIN_D	23	-0.73536	-1.62797	0.00488998	0.0331523
GO_POSTSYNAPSE_ORGANIZATION	111	-0.622933	-1.62832	0.00102354	0.0331342
GO_POSITIVE_REGULATION_OF_CELL_MORPHOGENESIS_INVOLVED_IN_DIFFERENTIATION	117	-0.634707	-1.62854	0	0.033222
GO_MITOTIC_CYTOKINESIS	67	-0.650265	-1.62856	0.00104167	0.0334178
GO_CELL_JUNCTION_ORGANIZATION	456	-0.609404	-1.63018	0	0.0327281
GO_CARDIAC_MUSCLE_TISSUE_MORPHOGENESIS	36	-0.698123	-1.63272	0	0.0314209
GO_POSITIVE_REGULATION_OF_FILOPODIUM_ASSEMBLY	23	-0.734917	-1.63359	0.00367647	0.0311395
GO_POSITIVE_REGULATION_OF_AMYLOID_PRECURSOR_PROTEIN_CATABOLIC_PROCESS	19	-0.649574	-1.42589	0.0644769	0.174101
GO_POSITIVE_REGULATION_OF_NEURAL_PRECURSOR_CELL_PROLIFERATION	25	-0.737266	-1.63516	0.00117233	0.0304231
GO_ACTIN_FILAMENT_BASED_TRANSPORT	19	-0.653436	-1.42422	0.0644362	0.176514
GO_REGENERATION	129	-0.626855	-1.63564	0	0.0303175
GO_REGULATION_OF_MEIOTIC_CELL_CYCLE	29	-0.715678	-1.63716	0.0023753	0.0297038
GO_SALIVARY_GLAND_DEVELOPMENT	31	-0.710784	-1.6373	0.00340522	0.0298036
GO_POSITIVE_REGULATION_OF_CHONDROCYTE_DIFFERENTIATION	15	-0.681281	-1.42153	0.0632911	0.18016
GO_NEURAL_CREST_CELL_MIGRATION	35	-0.696007	-1.63737	0.00114679	0.0299639
GO_TUBE_FORMATION	110	-0.641361	-1.63749	0	0.0301025
GO_CYTOSKELETON_DEPENDENT_CYTOKINESIS	76	-0.648496	-1.63815	0	0.0298482
GO_AORTIC_VALVE_DEVELOPMENT	20	-0.6529	-1.4207	0.0708181	0.180316
GO_CARDIAC_SEPTUM_DEVELOPMENT	83	-0.646995	-1.63847	0	0.0298374
GO_CELL_CELL_JUNCTION_ORGANIZATION	135	-0.629796	-1.64012	0	0.0291657
GO_REGULATION_OF_SMOOTHENED_SIGNALING_PATHWAY	58	-0.66479	-1.64097	0	0.0288814
GO_CARDIAC_VENTRICLE_DEVELOPMENT	81	-0.648951	-1.64163	0	0.0287041
GO_WATER_HOMEOSTASIS	40	-0.694626	-1.64327	0.00111235	0.0278882
GO_SKELETAL_SYSTEM_MORPHOGENESIS	127	-0.630405	-1.64375	0	0.0278205
GO_PALLIUM_DEVELOPMENT	115	-0.634099	-1.64675	0	0.0264792
GO_AXONAL_FASCICULATION	16	-0.677607	-1.41777	0.0657396	0.182825
GO_MUSCLE_TISSUE_DEVELOPMENT	242	-0.623956	-1.64786	0	0.0261797
GO_EMBRYONIC_CAMERA_TYPE_EYE_DEVELOPMENT	27	-0.636299	-1.41664	0.0502924	0.184145
GO_BIOMINERALIZATION	98	-0.641515	-1.6486	0	0.0259785
GO_RETINA_MORPHOGENESIS_IN_CAMERA_TYPE_EYE	31	-0.711157	-1.6497	0.00456621	0.0254986
GO_EYE_MORPHOGENESIS	90	-0.645143	-1.65077	0	0.0251599
GO_OSTEOBLAST_PROLIFERATION	22	-0.759795	-1.65168	0	0.024778
GO_PATTERN_SPECIFICATION_PROCESS	238	-0.62266	-1.65205	0	0.0247759
GO_MORPHOGENESIS_OF_A_BRANCHING_STRUCTURE	124	-0.639862	-1.65299	0	0.0244846
GO_PROTEIN_LOCALIZATION_TO_CHROMOSOME_CENTROMERIC_REGION	20	-0.760271	-1.65364	0.00372671	0.0244145
GO_NEGATIVE_REGULATION_OF_AXON_GUIDANCE	21	-0.650626	-1.41233	0.068323	0.189428
GO_REGULATION_OF_SMAD_PROTEIN_SIGNAL_TRANSDUCTION	19	-0.654929	-1.41197	0.0557621	0.189752
GO_CARDIAC_CHAMBER_DEVELOPMENT	113	-0.643469	-1.65416	0	0.0243434
GO_MICROVILLUS_ORGANIZATION	19	-0.662114	-1.41139	0.0619048	0.190219
GO_PROSTANOID_METABOLIC_PROCESS	37	-0.599585	-1.41132	0.0572057	0.189995
GO_EPITHELIAL_TUBE_FORMATION	97	-0.643885	-1.65468	0	0.0243116
GO_DEVELOPMENTAL_GROWTH_INVOLVED_IN_MORPHOGENESIS	158	-0.633956	-1.65537	0	0.0241028
GO_REGULATION_OF_METANEPHROS_DEVELOPMENT	16	-0.681366	-1.4101	0.0513834	0.191281
GO_APOPTOTIC_PROCESS_INVOLVED_IN_DEVELOPMENT	21	-0.764883	-1.65592	0	0.0240079
GO_NEURON_PROJECTION_GUIDANCE	177	-0.638135	-1.65625	0	0.024014
GO_POSITIVE_REGULATION_OF_TELOMERE_CAPPING	17	-0.664303	-1.40895	0.0669915	0.192453
GO_CARDIOCYTE_DIFFERENTIATION	95	-0.649066	-1.65648	0	0.0241171
GO_BRANCHING_INVOLVED_IN_SALIVARY_GLAND_MORPHOGENESIS	17	-0.773263	-1.65651	0.00124378	0.0242846
GO_MESODERM_MORPHOGENESIS	43	-0.685746	-1.65854	0.00110375	0.0235199
GO_MONOVALENT_INORGANIC_ANION_HOMEOSTASIS	16	-0.788926	-1.66089	0	0.0223337
GO_DIGESTIVE_TRACT_MORPHOGENESIS	23	-0.747384	-1.66106	0.00243309	0.022477
GO_CARDIAC_CHAMBER_MORPHOGENESIS	81	-0.655546	-1.6643	0	0.0212916
GO_MUSCLE_FIBER_DEVELOPMENT	32	-0.722836	-1.66436	0	0.0214216
GO_LUNG_EPITHELIUM_DEVELOPMENT	21	-0.771799	-1.66494	0	0.0213126
GO_EXTRACELLULAR_STRUCTURE_ORGANIZATION	272	-0.623332	-1.66525	0	0.0213715
GO_EMBRYONIC_ORGAN_DEVELOPMENT	269	-0.625735	-1.66696	0	0.0206673
GO_REGULATION_OF_KIDNEY_DEVELOPMENT	31	-0.721267	-1.6685	0.00112867	0.0203104
GO_SPECIFICATION_OF_ANIMAL_ORGAN_IDENTITY	17	-0.802075	-1.66994	0.00251889	0.0197974
GO_COMPLEMENT_ACTIVATION	35	-0.59526	-1.39996	0.0625724	0.205397
GO_MICROTUBULE_DEPOLYMERIZATION	35	-0.591338	-1.39882	0.0624291	0.20729
GO_MUSCLE_CELL_DEVELOPMENT	106	-0.652947	-1.67107	0	0.0195422
GO_REGULATION_OF_FILOPODIUM_ASSEMBLY	35	-0.714591	-1.6722	0.00114286	0.0191669
GO_CELL_COMMUNICATION_INVOLVED_IN_CARDIAC_CONDUCTION	33	-0.600154	-1.39769	0.059417	0.208355
GO_VERY_LONG_CHAIN_FATTY_ACID_METABOLIC_PROCESS	21	-0.643444	-1.39725	0.0634731	0.208911
GO_REGULATION_OF_SYNAPSE_ASSEMBLY	49	-0.685674	-1.67242	0	0.0192339
GO_EPIDERMIS_MORPHOGENESIS	16	-0.674292	-1.39655	0.0711563	0.209594
GO_MESODERM_DEVELOPMENT	73	-0.665194	-1.6729	0	0.0192399
GO_REGULATION_OF_ANIMAL_ORGAN_MORPHOGENESIS	175	-0.637148	-1.67335	0	0.0192222
GO_REGULATION_OF_MACROPHAGE_CHEMOTAXIS	24	-0.625346	-1.39587	0.0692951	0.209831
GO_EMBRYO_IMPLANTATION	41	-0.577643	-1.39573	0.0508287	0.209739
GO_MORPHOGENESIS_OF_EMBRYONIC_EPITHELIUM	103	-0.653701	-1.67597	0	0.018435
GO_CORTICAL_ACTIN_CYTOSKELETON_ORGANIZATION	36	-0.585748	-1.39519	0.0545455	0.209977
GO_PROSTATE_GLAND_MORPHOGENESIS	16	-0.808504	-1.67666	0	0.018322
GO_CELLULAR_RESPONSE_TO_RETINOIC_ACID	36	-0.594589	-1.39431	0.059887	0.211044
GO_ENDODERM_FORMATION	40	-0.699208	-1.67701	0	0.0183766
GO_SYNAPSE_ORGANIZATION	257	-0.636883	-1.67727	0	0.0184808
GO_EXOCRINE_SYSTEM_DEVELOPMENT	37	-0.708007	-1.67902	0	0.0179383
GO_ENDODERMAL_CELL_DIFFERENTIATION	35	-0.724357	-1.67936	0.00225734	0.0178914
GO_REGULATION_OF_MUSCLE_ORGAN_DEVELOPMENT	88	-0.66153	-1.67957	0	0.0179775
GO_REGULATION_OF_METALLOPEPTIDASE_ACTIVITY	15	-0.667192	-1.39284	0.0903308	0.211887
GO_REGULATION_OF_SISTER_CHROMATID_COHESION	18	-0.650226	-1.39267	0.0887199	0.211899
GO_CARDIAC_MUSCLE_CELL_ACTION_POTENTIAL	44	-0.575004	-1.39258	0.0562293	0.211758
GO_SODIUM_ION_HOMEOSTASIS	22	-0.763626	-1.67997	0	0.0179891
GO_REGULATION_OF_KERATINOCYTE_PROLIFERATION	22	-0.768343	-1.68023	0.00121212	0.0181117
GO_ANTERIOR_POSTERIOR_AXIS_SPECIFICATION	24	-0.617857	-1.39107	0.0811456	0.21376
GO_POSITIVE_REGULATION_OF_CARDIAC_MUSCLE_CELL_PROLIFERATION	17	-0.796858	-1.68052	0.00127389	0.0181506
GO_DIGESTIVE_SYSTEM_DEVELOPMENT	80	-0.666197	-1.68161	0	0.0179559
GO_POSITIVE_REGULATION_OF_BIOMINERALIZATION	31	-0.600672	-1.3896	0.0771889	0.215653
GO_REGULATION_OF_EMBRYONIC_DEVELOPMENT	90	-0.66154	-1.68195	0	0.0179942
GO_POSITIVE_REGULATION_OF_MORPHOGENESIS_OF_AN_EPITHELIUM	19	-0.772953	-1.68221	0.00499376	0.0180511
GO_CELL_JUNCTION_MAINTENANCE	21	-0.768301	-1.68251	0.0012285	0.0180285
GO_ARTERY_DEVELOPMENT	64	-0.666233	-1.68322	0	0.0178797
GO_REGULATION_OF_FIBROBLAST_GROWTH_FACTOR_RECEPTOR_SIGNALING_PATHWAY	17	-0.649025	-1.38796	0.0997506	0.217261
GO_ASTROCYTE_DEVELOPMENT	33	-0.592879	-1.3869	0.0694289	0.219138
GO_MEIOTIC_CHROMOSOME_SEPARATION	16	-0.791896	-1.6859	0	0.0170905
GO_NEGATIVE_REGULATION_OF_DENDRITE_DEVELOPMENT	19	-0.641395	-1.38607	0.0813517	0.220006
GO_BONE_MATURATION	15	-0.669138	-1.38607	0.091024	0.21965
GO_EXTRACELLULAR_MATRIX_ASSEMBLY	32	-0.595724	-1.38528	0.0778781	0.220883
GO_HINDBRAIN_MORPHOGENESIS	27	-0.617476	-1.38502	0.069378	0.221024
GO_ASTROCYTE_ACTIVATION	20	-0.649039	-1.38483	0.09257	0.221045
GO_CARDIAC_MUSCLE_CELL_CONTRACTION	42	-0.578872	-1.38457	0.0548847	0.221217
GO_FOLIC_ACID_METABOLIC_PROCESS	17	-0.662981	-1.38451	0.0783582	0.220989
GO_NEGATIVE_REGULATION_OF_LYMPHOCYTE_APOPTOTIC_PROCESS	25	-0.618078	-1.38406	0.0681818	0.221547
GO_SENSORY_PERCEPTION_OF_MECHANICAL_STIMULUS	93	-0.660432	-1.68811	0	0.0165614
GO_REGULATION_OF_T_CELL_DIFFERENTIATION_IN_THYMUS	19	-0.640968	-1.38394	0.0848939	0.22106
GO_REGULATION_OF_GASTRULATION	25	-0.616546	-1.38392	0.0760095	0.220731
GO_POSITIVE_REGULATION_OF_EPIDERMIS_DEVELOPMENT	22	-0.63358	-1.38363	0.0818071	0.220956
GO_REGULATION_OF_CALCINEURIN_MEDIATED_SIGNALING	28	-0.602588	-1.38339	0.0716763	0.221102
GO_ATTACHMENT_OF_SPINDLE_MICROTUBULES_TO_KINETOCHORE	30	-0.740974	-1.68821	0.0011534	0.0166714
GO_MAMMARY_GLAND_MORPHOGENESIS	32	-0.74154	-1.6902	0.0011325	0.0161009
GO_REGULATION_OF_TELOMERASE_ACTIVITY	45	-0.571816	-1.38196	0.0559824	0.222879
GO_REGULATION_OF_MACROPHAGE_MIGRATION	34	-0.589577	-1.38164	0.0644419	0.223146
GO_MUSCLE_ORGAN_MORPHOGENESIS	46	-0.703983	-1.69176	0	0.0158871
GO_ZINC_ION_TRANSPORT	19	-0.632196	-1.38141	0.0702179	0.22292
GO_REGULATION_OF_CARDIAC_CONDUCTION	39	-0.589248	-1.38134	0.0526316	0.222695
GO_EPIBOLY	26	-0.61285	-1.38103	0.0705742	0.223007
GO_POSITIVE_REGULATION_OF_TRANSCRIPTION_OF_NOTCH_RECEPTOR_TARGET	17	-0.651127	-1.38059	0.0797468	0.223535
GO_VENTRICULAR_CARDIAC_MUSCLE_CELL_ACTION_POTENTIAL	20	-0.643551	-1.37959	0.0836364	0.225333
GO_GLYCOPROTEIN_CATABOLIC_PROCESS	17	-0.645706	-1.37935	0.0909091	0.225536
GO_STEM_CELL_PROLIFERATION	78	-0.660851	-1.69277	0	0.0156977
GO_TRABECULA_MORPHOGENESIS	34	-0.591661	-1.37787	0.0583524	0.22789
GO_COLLATERAL_SPROUTING	17	-0.798502	-1.6928	0.00129702	0.0158612
GO_GLUTAMINE_METABOLIC_PROCESS	16	-0.657179	-1.37707	0.102999	0.228945
GO_HEART_FORMATION	17	-0.787522	-1.69339	0.00374532	0.0159012
GO_REGULATION_OF_ACTION_POTENTIAL	34	-0.599588	-1.37611	0.0634921	0.230189
GO_TETRAHYDROFOLATE_METABOLIC_PROCESS	15	-0.66115	-1.37608	0.0982143	0.229875
GO_MICROTUBULE_ORGANIZING_CENTER_LOCALIZATION	27	-0.613148	-1.37489	0.0638298	0.232019
GO_KERATINOCYTE_PROLIFERATION	25	-0.751352	-1.6951	0.00233372	0.0155273
GO_OOCYTE_DIFFERENTIATION	32	-0.591864	-1.3745	0.0672854	0.232098
GO_FORMATION_OF_PRIMARY_GERM_LAYER	83	-0.669116	-1.6972	0	0.0151159
GO_CAMERA_TYPE_EYE_MORPHOGENESIS	73	-0.676544	-1.69884	0	0.0147859
GO_REGULATION_OF_EPIDERMAL_CELL_DIFFERENTIATION	37	-0.577001	-1.3738	0.0734149	0.232418
GO_REGULATION_OF_CELL_CELL_ADHESION_MEDIATED_BY_CADHERIN	15	-0.671186	-1.37297	0.100391	0.233804
GO_MOLTING_CYCLE	63	-0.679121	-1.69885	0	0.0149383
GO_FEMALE_MEIOTIC_NUCLEAR_DIVISION	22	-0.626063	-1.37176	0.0891331	0.235594
GO_HISTONE_EXCHANGE	36	-0.57874	-1.37153	0.0573678	0.235667
GO_REGULATION_OF_ORGAN_GROWTH	72	-0.681787	-1.6991	0	0.015094
GO_REGULATION_OF_EXTENT_OF_CELL_GROWTH	78	-0.675055	-1.69931	0	0.0151698
GO_CARTILAGE_DEVELOPMENT	117	-0.657703	-1.70044	0	0.0149416
GO_NUCLEUS_LOCALIZATION	26	-0.606919	-1.37047	0.0813008	0.236459
GO_NEPHRON_MORPHOGENESIS	37	-0.722923	-1.70069	0.0011236	0.0150387
GO_DNA_REPLICATION_INDEPENDENT_NUCLEOSOME_ORGANIZATION	34	-0.583058	-1.37004	0.0695249	0.236679
GO_GLUTAMINE_FAMILY_AMINO_ACID_CATABOLIC_PROCESS	17	-0.647185	-1.36993	0.0841584	0.236568
GO_EMBRYONIC_CRANIAL_SKELETON_MORPHOGENESIS	27	-0.600917	-1.36934	0.0714286	0.237394
GO_REGULATION_OF_NEURON_MIGRATION	26	-0.60672	-1.36884	0.0772947	0.238083
GO_AXO_DENDRITIC_TRANSPORT	55	-0.553265	-1.36819	0.0527449	0.239089
GO_EMBRYONIC_AXIS_SPECIFICATION	19	-0.645305	-1.36812	0.100128	0.238886
GO_BONE_GROWTH	21	-0.778539	-1.70076	0.00365408	0.0151813
GO_POSITIVE_REGULATION_OF_EXTRACELLULAR_MATRIX_ORGANIZATION	16	-0.653796	-1.36745	0.100127	0.239642
GO_RESPIRATORY_SYSTEM_DEVELOPMENT	139	-0.652725	-1.70496	0	0.0138772
GO_PROTEIN_LOCALIZATION_TO_CHROMATIN	21	-0.631157	-1.36731	0.0799032	0.239227
GO_CELLULAR_COMPONENT_MAINTENANCE	43	-0.700858	-1.7051	0	0.0139763
GO_CENTRAL_NERVOUS_SYSTEM_NEURON_AXONOGENESIS	28	-0.595048	-1.36682	0.0838184	0.239501
GO_GLAND_MORPHOGENESIS	87	-0.672679	-1.7052	0	0.0140777
GO_BONE_MORPHOGENESIS	58	-0.688598	-1.70677	0	0.013662
GO_CORONARY_VASCULATURE_DEVELOPMENT	35	-0.578833	-1.36329	0.072	0.246077
GO_MORPHOGENESIS_OF_AN_EPITHELIAL_SHEET	45	-0.713853	-1.70828	0	0.013305
GO_POSITIVE_REGULATION_OF_PATHWAY_RESTRICTED_SMAD_PROTEIN_PHOSPHORYLATION	28	-0.59723	-1.36221	0.0739437	0.247675
GO_GLOMERULAR_EPITHELIUM_DEVELOPMENT	15	-0.653004	-1.36032	0.104061	0.251513
GO_ANTIMICROBIAL_HUMORAL_RESPONSE	44	-0.562497	-1.35959	0.0677026	0.252686
GO_AXONAL_TRANSPORT	45	-0.564747	-1.35904	0.063922	0.25355
GO_HEART_GROWTH	64	-0.689662	-1.70889	0	0.0132741
GO_CEREBRAL_CORTEX_DEVELOPMENT	84	-0.671046	-1.70926	0	0.0133007
GO_POSTSYNAPTIC_SPECIALIZATION_ORGANIZATION	19	-0.634654	-1.35805	0.0920398	0.254647
GO_EMBRYONIC_PATTERN_SPECIFICATION	38	-0.714876	-1.70972	0	0.0133761
GO_MESONEPHRIC_TUBULE_MORPHOGENESIS	30	-0.742689	-1.71139	0	0.0130318
GO_POSITIVE_REGULATION_OF_CELL_ADHESION_MEDIATED_BY_INTEGRIN	16	-0.654448	-1.35745	0.104922	0.254908
GO_PYRIDINE_CONTAINING_COMPOUND_METABOLIC_PROCESS	32	-0.589469	-1.35736	0.0788288	0.254725
GO_LYMPHOCYTE_APOPTOTIC_PROCESS	59	-0.552895	-1.35709	0.0537634	0.254973
GO_OOCYTE_MATURATION	17	-0.640505	-1.35661	0.104193	0.255645
GO_FAT_SOLUBLE_VITAMIN_METABOLIC_PROCESS	22	-0.616486	-1.35651	0.108772	0.255511
GO_TERPENOID_METABOLIC_PROCESS	59	-0.544275	-1.35633	0.0540827	0.255556
GO_CELL_JUNCTION_DISASSEMBLY	16	-0.655923	-1.35608	0.103896	0.255706
GO_REGULATION_OF_CARDIAC_MUSCLE_TISSUE_DEVELOPMENT	59	-0.694067	-1.71363	0	0.0125324
GO_GLUTAMINE_FAMILY_AMINO_ACID_METABOLIC_PROCESS	49	-0.557922	-1.35576	0.0629067	0.255621
GO_MIDBRAIN_DEVELOPMENT	57	-0.545816	-1.3555	0.056443	0.255808
GO_NEGATIVE_REGULATION_OF_T_CELL_APOPTOTIC_PROCESS	15	-0.661832	-1.3554	0.106464	0.255671
GO_MAMMARY_GLAND_DUCT_MORPHOGENESIS	23	-0.776145	-1.71461	0	0.0125141
GO_EMBRYONIC_SKELETAL_SYSTEM_MORPHOGENESIS	44	-0.709137	-1.71628	0	0.0121695
GO_POSITIVE_REGULATION_OF_ACTIVATED_T_CELL_PROLIFERATION	17	-0.640025	-1.35424	0.123426	0.25722
GO_REGULATION_OF_HOMOTYPIC_CELL_CELL_ADHESION	22	-0.60599	-1.35346	0.0996441	0.258489
GO_MACROPHAGE_CHEMOTAXIS	29	-0.597258	-1.3531	0.084507	0.258951
GO_ODONTOGENESIS_OF_DENTIN_CONTAINING_TOOTH	49	-0.707356	-1.7165	0	0.0122346
GO_NEGATIVE_REGULATION_OF_BIOMINERALIZATION	17	-0.633969	-1.35106	0.09125	0.262793
GO_REGULATION_OF_UBIQUITIN_PROTEIN_LIGASE_ACTIVITY	22	-0.612824	-1.35058	0.104294	0.263438
GO_T_CELL_DIFFERENTIATION_IN_THYMUS	59	-0.545525	-1.35012	0.0565032	0.264094
GO_REGULATION_OF_BIOMINERALIZATION	57	-0.542776	-1.34961	0.06695	0.264798
GO_NEGATIVE_REGULATION_OF_NIK_NF_KAPPAB_SIGNALING	18	-0.635327	-1.34961	0.117936	0.264418
GO_SEMI_LUNAR_VALVE_DEVELOPMENT	23	-0.597301	-1.34895	0.119277	0.265488
GO_REGULATION_OF_STEM_CELL_PROLIFERATION	42	-0.713354	-1.71722	0.00223214	0.0122635
GO_STRIATED_MUSCLE_CELL_PROLIFERATION	45	-0.708325	-1.71847	0	0.0120436
GO_REGULATION_OF_MULTI_ORGANISM_PROCESS	40	-0.563313	-1.34665	0.0852018	0.269614
GO_MODIFICATION_OF_SYNAPTIC_STRUCTURE	19	-0.610492	-1.34644	0.112624	0.269721
GO_POSITIVE_REGULATION_OF_LYMPHOCYTE_APOPTOTIC_PROCESS	15	-0.648247	-1.34637	0.111969	0.269489
GO_RESPONSE_TO_ESTROGEN	55	-0.543777	-1.34615	0.075693	0.269628
GO_POSITIVE_REGULATION_OF_PROTEIN_LOCALIZATION_TO_CELL_SURFACE	16	-0.639	-1.34573	0.107143	0.270268
GO_POSITIVE_REGULATION_OF_AXONOGENESIS	64	-0.689697	-1.71987	0	0.0117921
GO_ESTABLISHMENT_OF_MITOCHONDRION_LOCALIZATION	18	-0.632601	-1.34477	0.10375	0.271724
GO_ESTABLISHMENT_OR_MAINTENANCE_OF_BIPOLAR_CELL_POLARITY	34	-0.7327	-1.72122	0	0.0115462
GO_HEART_TRABECULA_MORPHOGENESIS	23	-0.592412	-1.34356	0.105968	0.273704
GO_HOMOLOGOUS_CHROMOSOME_SEGREGATION	28	-0.58657	-1.34265	0.0939358	0.275426
GO_LABYRINTHINE_LAYER_DEVELOPMENT	32	-0.575706	-1.33971	0.0941704	0.281997
GO_CELLULAR_RESPONSE_TO_VITAMIN	20	-0.606068	-1.33938	0.114957	0.282437
GO_NEURAL_TUBE_PATTERNING	27	-0.584791	-1.3392	0.0957944	0.282477
GO_STRIATED_MUSCLE_CELL_APOPTOTIC_PROCESS	26	-0.591431	-1.33902	0.107488	0.282521
GO_CATECHOLAMINE_SECRETION	19	-0.616826	-1.33858	0.10989	0.283179
GO_CELLULAR_MODIFIED_AMINO_ACID_BIOSYNTHETIC_PROCESS	38	-0.562645	-1.33828	0.0991091	0.283456
GO_NEGATIVE_REGULATION_OF_ACTIN_FILAMENT_POLYMERIZATION	45	-0.556538	-1.33822	0.0854326	0.283206
GO_NEGATIVE_REGULATION_OF_COAGULATION	34	-0.571287	-1.3376	0.0920455	0.28424
GO_PEPTIDYL_TYROSINE_AUTOPHOSPHORYLATION	34	-0.575131	-1.33711	0.0832383	0.285028
GO_POSITIVE_REGULATION_OF_PLASMA_MEMBRANE_BOUNDED_CELL_PROJECTION_ASSEMBLY	76	-0.528345	-1.33705	0.0550363	0.284761
GO_AMYLOID_BETA_METABOLIC_PROCESS	42	-0.551957	-1.33648	0.107539	0.285718
GO_PYRIDINE_CONTAINING_COMPOUND_BIOSYNTHETIC_PROCESS	27	-0.597094	-1.33625	0.100467	0.285911
GO_RESPONSE_TO_GONADOTROPIN	20	-0.79123	-1.72122	0.00123762	0.011716
GO_NEGATIVE_REGULATION_OF_EMBRYONIC_DEVELOPMENT	20	-0.794211	-1.72306	0	0.0113505
GO_MAMMARY_GLAND_EPITHELIUM_DEVELOPMENT	50	-0.700092	-1.72598	0	0.0107781
GO_NEGATIVE_REGULATION_OF_NUCLEAR_DIVISION	51	-0.705372	-1.72762	0	0.0105876
GO_HIPPO_SIGNALING	41	-0.727923	-1.73195	0	0.00966573
GO_RENAL_SYSTEM_PROCESS	76	-0.529087	-1.3341	0.0539419	0.288611
GO_KIDNEY_EPITHELIUM_DEVELOPMENT	79	-0.681449	-1.73286	0	0.00953963
GO_REGULATION_OF_PROTEIN_LOCALIZATION_TO_SYNAPSE	20	-0.620134	-1.33406	0.111786	0.287915
GO_CELLULAR_RESPONSE_TO_VASCULAR_ENDOTHELIAL_GROWTH_FACTOR_STIMULUS	42	-0.552531	-1.33363	0.0944882	0.288478
GO_GENITALIA_DEVELOPMENT	29	-0.770584	-1.73608	0.00116414	0.00905009
GO_NEGATIVE_REGULATION_OF_DEVELOPMENTAL_GROWTH	72	-0.530562	-1.33309	0.0513627	0.288977
GO_POSITIVE_REGULATION_OF_CALCIUM_MEDIATED_SIGNALING	27	-0.589022	-1.33266	0.0965116	0.289583
GO_DENDRITIC_SPINE_MAINTENANCE	16	-0.64298	-1.33245	0.134271	0.289684
GO_REGULATORY_T_CELL_DIFFERENTIATION	28	-0.592338	-1.33183	0.0968109	0.290749
GO_NEGATIVE_REGULATION_OF_T_CELL_PROLIFERATION	46	-0.550882	-1.33162	0.0911087	0.290881
GO_CELL_FATE_SPECIFICATION	30	-0.750568	-1.73724	0	0.00886393
GO_CELLULAR_RESPONSE_TO_CORTICOSTEROID_STIMULUS	46	-0.549391	-1.33121	0.0883978	0.291102
GO_GLANDULAR_EPITHELIAL_CELL_DIFFERENTIATION	28	-0.581938	-1.33058	0.106977	0.292222
GO_ESTABLISHMENT_OF_SPINDLE_ORIENTATION	30	-0.578707	-1.3299	0.106852	0.293479
GO_NEGATIVE_REGULATION_OF_ORGAN_GROWTH	26	-0.589678	-1.3294	0.117716	0.294328
GO_REGULATION_OF_NEUROBLAST_PROLIFERATION	17	-0.630103	-1.32919	0.142151	0.294455
GO_REGULATION_OF_LYMPHOCYTE_APOPTOTIC_PROCESS	44	-0.547559	-1.32862	0.0866667	0.295405
GO_REGULATION_OF_TELOMERE_CAPPING	26	-0.594811	-1.32808	0.110337	0.29624
GO_PHENOL_CONTAINING_COMPOUND_BIOSYNTHETIC_PROCESS	19	-0.617479	-1.3278	0.114914	0.296505
GO_METANEPHROS_DEVELOPMENT	50	-0.718181	-1.73735	0	0.00901166
GO_POSITIVE_REGULATION_OF_DEVELOPMENTAL_GROWTH	114	-0.673843	-1.74032	0	0.00839334
GO_CALCINEURIN_MEDIATED_SIGNALING	36	-0.561673	-1.32468	0.0912125	0.302991
GO_ENDOCARDIAL_CUSHION_DEVELOPMENT	25	-0.598418	-1.32385	0.111111	0.304639
GO_VENTRICULAR_CARDIAC_MUSCLE_TISSUE_DEVELOPMENT	35	-0.734132	-1.74054	0	0.00850594
GO_POSITIVE_REGULATION_OF_CYTOKINESIS	26	-0.590571	-1.32334	0.125899	0.305052
GO_POSITIVE_REGULATION_OF_ORGANELLE_ASSEMBLY	57	-0.540806	-1.32297	0.0646186	0.305575
GO_DEVELOPMENT_OF_PRIMARY_FEMALE_SEXUAL_CHARACTERISTICS	70	-0.520545	-1.32267	0.0566632	0.305956
GO_CHLORIDE_TRANSPORT	44	-0.548798	-1.32235	0.089701	0.306413
GO_EMBRYONIC_SKELETAL_SYSTEM_DEVELOPMENT	63	-0.696667	-1.74251	0	0.00800467
GO_INOSITOL_PHOSPHATE_MEDIATED_SIGNALING	43	-0.555488	-1.32179	0.103261	0.306941
GO_NEGATIVE_REGULATION_OF_METAPHASE_ANAPHASE_TRANSITION_OF_CELL_CYCLE	35	-0.746412	-1.74474	0.0023068	0.0078328
GO_GLOMERULUS_DEVELOPMENT	41	-0.552762	-1.32089	0.0945495	0.308379
GO_LYMPHOCYTE_COSTIMULATION	43	-0.552078	-1.32033	0.0928177	0.309374
GO_EPIDERMAL_CELL_DIFFERENTIATION	125	-0.66732	-1.74665	0	0.00763829
GO_MACROPHAGE_MIGRATION	42	-0.548929	-1.3179	0.0982533	0.314603
GO_PHENOL_CONTAINING_COMPOUND_METABOLIC_PROCESS	48	-0.546513	-1.31779	0.082618	0.314482
GO_ONE_CARBON_METABOLIC_PROCESS	25	-0.590406	-1.31776	0.128297	0.314175
GO_POSITIVE_REGULATION_OF_TRANSMEMBRANE_RECEPTOR_PROTEIN_SERINE_THREONINE_KINASE_SIGNALING_PATHWAY	70	-0.529918	-1.31743	0.0634249	0.314592
GO_POSITIVE_REGULATION_OF_CARDIAC_MUSCLE_TISSUE_DEVELOPMENT	33	-0.746996	-1.74746	0	0.0076767
GO_POSITIVE_REGULATION_OF_PROTEIN_TYROSINE_KINASE_ACTIVITY	43	-0.550209	-1.31711	0.0829694	0.314561
GO_BRANCHED_CHAIN_AMINO_ACID_METABOLIC_PROCESS	24	-0.588549	-1.31689	0.122066	0.314688
GO_VENTRICULAR_SYSTEM_DEVELOPMENT	23	-0.599163	-1.31661	0.127893	0.314978
GO_PROTEIN_DEPOLYMERIZATION	89	-0.518351	-1.31612	0.0508827	0.315791
GO_POSITIVE_REGULATION_OF_OSSIFICATION	66	-0.531858	-1.31595	0.0672269	0.315796
GO_PROTEIN_LOCALIZATION_TO_SYNAPSE	47	-0.541672	-1.31542	0.0900322	0.316658
GO_REGULATION_OF_PLATELET_AGGREGATION	15	-0.632537	-1.31533	0.145058	0.316508
GO_COLLAGEN_CATABOLIC_PROCESS	29	-0.573364	-1.31529	0.122706	0.316176
GO_IRON_ION_TRANSPORT	54	-0.533472	-1.31527	0.0879828	0.315826
GO_CHROMOSOME_SEPARATION	81	-0.688903	-1.74821	0	0.00759409
GO_REGULATION_OF_MONONUCLEAR_CELL_MIGRATION	39	-0.556685	-1.31335	0.0974244	0.319934
GO_REGULATION_OF_AMYLOID_BETA_FORMATION	28	-0.5831	-1.31181	0.118605	0.32339
GO_MITOTIC_DNA_INTEGRITY_CHECKPOINT	97	-0.509416	-1.31115	0.0541922	0.324664
GO_POSITIVE_REGULATION_OF_MUSCLE_TISSUE_DEVELOPMENT	44	-0.735644	-1.74885	0	0.00759772
GO_REGULATION_OF_AMYLOID_PRECURSOR_PROTEIN_CATABOLIC_PROCESS	32	-0.565161	-1.31086	0.113557	0.324557
GO_NEGATIVE_REGULATION_OF_NF_KAPPAB_TRANSCRIPTION_FACTOR_ACTIVITY	70	-0.519831	-1.31066	0.086911	0.324675
GO_MATERNAL_PLACENTA_DEVELOPMENT	31	-0.573019	-1.31065	0.10023	0.324304
GO_CHROMOSOME_ORGANIZATION_INVOLVED_IN_MEIOTIC_CELL_CYCLE	38	-0.563333	-1.31063	0.108791	0.323942
GO_RESPONSE_TO_EPIDERMAL_GROWTH_FACTOR	38	-0.553886	-1.31052	0.10426	0.32382
GO_COPII_COATED_VESICLE_BUDDING	68	-0.525142	-1.31047	0.0675105	0.323524
GO_CELLULAR_RESPONSE_TO_ACID_CHEMICAL	65	-0.529556	-1.31016	0.0774194	0.323953
GO_CELL_CELL_SIGNALING_INVOLVED_IN_CARDIAC_CONDUCTION	18	-0.616393	-1.30953	0.134496	0.325126
GO_EAR_DEVELOPMENT	122	-0.669908	-1.74911	0	0.00769235
GO_ALPHA_AMINO_ACID_CATABOLIC_PROCESS	63	-0.525418	-1.30882	0.0857143	0.326165
GO_EPIDERMIS_DEVELOPMENT	194	-0.664157	-1.74962	0	0.00773478
GO_MECHANORECEPTOR_DIFFERENTIATION	39	-0.553314	-1.30781	0.10341	0.327946
GO_REGULATION_OF_SISTER_CHROMATID_SEGREGATION	75	-0.688267	-1.751	0	0.00766528
GO_NEGATIVE_REGULATION_OF_LEUKOCYTE_CHEMOTAXIS	15	-0.632206	-1.30721	0.157623	0.328722
GO_EMBRYONIC_DIGIT_MORPHOGENESIS	37	-0.558126	-1.30668	0.113082	0.329696
GO_RESPONSE_TO_ACID_CHEMICAL	101	-0.500556	-1.3051	0.069001	0.333597
GO_METAPHASE_ANAPHASE_TRANSITION_OF_CELL_CYCLE	57	-0.716832	-1.75121	0	0.00780568
GO_PROTEIN_LOCALIZATION_TO_CELL_SURFACE	50	-0.534934	-1.30314	0.100967	0.338012
GO_REGULATION_OF_ER_TO_GOLGI_VESICLE_MEDIATED_TRANSPORT	16	-0.619539	-1.3029	0.137761	0.338205
GO_POSITIVE_REGULATION_OF_GLYCOPROTEIN_BIOSYNTHETIC_PROCESS	19	-0.595687	-1.30264	0.149327	0.338455
GO_NEGATIVE_REGULATION_OF_CHROMOSOME_SEGREGATION	40	-0.736931	-1.75234	0	0.00763606
GO_SIGNAL_TRANSDUCTION_INVOLVED_IN_CELL_CYCLE_CHECKPOINT	65	-0.523448	-1.30212	0.0827301	0.339034
GO_NEGATIVE_REGULATION_OF_DNA_BINDING	39	-0.54719	-1.30168	0.111732	0.339781
GO_REGULATION_OF_INSULIN_SECRETION	109	-0.506617	-1.30073	0.0552147	0.341815
GO_CELLULAR_RESPONSE_TO_CAMP	37	-0.55172	-1.30066	0.120867	0.341586
GO_REGULATION_OF_STRIATED_MUSCLE_CONTRACTION	53	-0.531829	-1.30066	0.0854701	0.341171
GO_SYNAPTIC_VESICLE_PRIMING	16	-0.620982	-1.3006	0.175192	0.340921
GO_CARDIAC_MUSCLE_CELL_ACTION_POTENTIAL_INVOLVED_IN_CONTRACTION	30	-0.563325	-1.30054	0.139019	0.340651
GO_PROTEOGLYCAN_BIOSYNTHETIC_PROCESS	47	-0.541428	-1.30029	0.102198	0.340855
GO_REGULATION_OF_HORMONE_METABOLIC_PROCESS	24	-0.58282	-1.30003	0.130435	0.341133
GO_REGULATION_OF_HEART_GROWTH	50	-0.713459	-1.75311	0	0.00776194
GO_POSITIVE_REGULATION_OF_T_CELL_CYTOKINE_PRODUCTION	18	-0.599625	-1.29961	0.15995	0.341429
GO_FATTY_ACYL_COA_BIOSYNTHETIC_PROCESS	22	-0.587849	-1.29916	0.143201	0.342225
GO_NEGATIVE_REGULATION_OF_MUSCLE_TISSUE_DEVELOPMENT	34	-0.555184	-1.29881	0.127828	0.342693
GO_SKIN_EPIDERMIS_DEVELOPMENT	54	-0.714129	-1.75476	0	0.00768688
GO_CARDIAC_MUSCLE_CELL_PROLIFERATION	37	-0.744238	-1.75491	0	0.00786158
GO_DETECTION_OF_STIMULUS_INVOLVED_IN_SENSORY_PERCEPTION	33	-0.554838	-1.29845	0.139326	0.342326
GO_TELOMERE_MAINTENANCE_VIA_SEMI_CONSERVATIVE_REPLICATION	27	-0.570811	-1.29835	0.142857	0.342182
GO_NEGATIVE_REGULATION_OF_LEUKOCYTE_PROLIFERATION	61	-0.513092	-1.29792	0.0932203	0.342867
GO_HISTONE_PHOSPHORYLATION	33	-0.556247	-1.29787	0.122566	0.342563
GO_NEGATIVE_REGULATION_OF_ANIMAL_ORGAN_MORPHOGENESIS	22	-0.793882	-1.75663	0	0.00759248
GO_MONOAMINE_TRANSPORT	31	-0.562146	-1.29718	0.128472	0.343552
GO_REGULATION_OF_CHROMOSOME_SEGREGATION	94	-0.67677	-1.75696	0	0.00770659
GO_INORGANIC_ANION_TRANSMEMBRANE_TRANSPORT	54	-0.532248	-1.29638	0.102863	0.344798
GO_RESPONSE_TO_DEXAMETHASONE	30	-0.552959	-1.29632	0.141553	0.344538
GO_REGULATION_OF_CHROMOSOME_SEPARATION	61	-0.716135	-1.75788	0	0.00778073
GO_CELLULAR_MODIFIED_AMINO_ACID_METABOLIC_PROCESS	120	-0.497771	-1.29574	0.0530071	0.345214
GO_NEURON_FATE_COMMITMENT	18	-0.601655	-1.2954	0.15	0.345693
GO_BRAIN_MORPHOGENESIS	21	-0.598892	-1.29532	0.148466	0.345453
GO_NEGATIVE_REGULATION_OF_DNA_REPAIR	27	-0.570917	-1.29423	0.134503	0.347853
GO_REGULATION_OF_CELL_CYCLE_CHECKPOINT	30	-0.559246	-1.29254	0.14043	0.351971
GO_NEUROTRANSMITTER_SECRETION	101	-0.506309	-1.29227	0.0574359	0.352283
GO_POSITIVE_REGULATION_OF_ORGAN_GROWTH	36	-0.754402	-1.76029	0	0.00737292
GO_CARDIAC_CONDUCTION	75	-0.511983	-1.29116	0.0827301	0.354498
GO_REGULATION_OF_PEPTIDE_HORMONE_SECRETION	124	-0.498682	-1.2909	0.055102	0.354753
GO_RESPONSE_TO_IONIZING_RADIATION	123	-0.498112	-1.29078	0.0517767	0.354675
GO_RESPONSE_TO_RETINOIC_ACID	65	-0.518295	-1.29032	0.0896478	0.355496
GO_POSITIVE_REGULATION_OF_PROTEIN_MATURATION	18	-0.60458	-1.29022	0.162879	0.355321
GO_MAMMARY_GLAND_EPITHELIAL_CELL_PROLIFERATION	25	-0.573443	-1.29009	0.151732	0.355233
GO_LEUKOCYTE_APOPTOTIC_PROCESS	91	-0.501805	-1.29006	0.060575	0.354896
GO_SINGLE_STRANDED_VIRAL_RNA_REPLICATION_VIA_DOUBLE_STRANDED_DNA_INTERMEDIATE	16	-0.613484	-1.29005	0.156171	0.354507
GO_HORMONE_METABOLIC_PROCESS	106	-0.495458	-1.2899	0.0668693	0.354471
GO_NEGATIVE_REGULATION_OF_CELL_CYCLE_G2_M_PHASE_TRANSITION	90	-0.506918	-1.28945	0.0747185	0.355345
GO_VESICLE_CYTOSKELETAL_TRAFFICKING	58	-0.527012	-1.28925	0.108954	0.355458
GO_REGULATION_OF_GLYCOPROTEIN_METABOLIC_PROCESS	37	-0.536741	-1.2889	0.135845	0.355931
GO_REPLACEMENT_OSSIFICATION	19	-0.598896	-1.28886	0.165829	0.355614
GO_CARDIAC_MUSCLE_TISSUE_DEVELOPMENT	137	-0.676267	-1.76305	0	0.00708688
GO_CELLULAR_RESPONSE_TO_DEXAMETHASONE_STIMULUS	24	-0.580031	-1.28704	0.152019	0.359588
GO_REGULATION_OF_KERATINOCYTE_DIFFERENTIATION	26	-0.568558	-1.28681	0.151972	0.359787
GO_CELL_CELL_ADHESION_VIA_PLASMA_MEMBRANE_ADHESION_MOLECULES	125	-0.682946	-1.76464	0	0.00698049
GO_POSITIVE_REGULATION_OF_WOUND_HEALING	40	-0.545863	-1.28614	0.136166	0.360755
GO_POLARIZED_EPITHELIAL_CELL_DIFFERENTIATION	16	-0.608619	-1.286	0.178663	0.360704
GO_POSITIVE_REGULATION_OF_DNA_REPLICATION	35	-0.542403	-1.28596	0.136	0.360383
GO_CYCLIC_NUCLEOTIDE_METABOLIC_PROCESS	21	-0.593095	-1.28576	0.161491	0.360499
GO_DETECTION_OF_MECHANICAL_STIMULUS	20	-0.583106	-1.28567	0.15092	0.360301
GO_REGULATION_OF_MYELINATION	32	-0.556844	-1.28453	0.124161	0.362897
GO_REGULATION_OF_CARDIAC_MUSCLE_CONTRACTION	51	-0.52518	-1.28405	0.120783	0.363705
GO_SIGNAL_TRANSDUCTION_IN_ABSENCE_OF_LIGAND	57	-0.525267	-1.284	0.111588	0.363419
GO_COLLAGEN_BIOSYNTHETIC_PROCESS	28	-0.563839	-1.28373	0.161883	0.36376
GO_DECIDUALIZATION	22	-0.584386	-1.28348	0.151659	0.363964
GO_AMYLOID_PRECURSOR_PROTEIN_CATABOLIC_PROCESS	42	-0.536948	-1.28284	0.138462	0.365249
GO_VITAMIN_BIOSYNTHETIC_PROCESS	15	-0.612714	-1.28236	0.150063	0.366033
GO_REGULATION_OF_BROWN_FAT_CELL_DIFFERENTIATION	18	-0.603242	-1.28233	0.16625	0.365671
GO_CELLULAR_AMINO_ACID_CATABOLIC_PROCESS	82	-0.501797	-1.28191	0.0742678	0.366406
GO_OLIGODENDROCYTE_DIFFERENTIATION	64	-0.505787	-1.28135	0.0998948	0.367574
GO_POST_EMBRYONIC_DEVELOPMENT	60	-0.519294	-1.28135	0.0951374	0.367158
GO_POSITIVE_REGULATION_OF_G1_S_TRANSITION_OF_MITOTIC_CELL_CYCLE	31	-0.555285	-1.28115	0.117647	0.367234
GO_POTASSIUM_ION_HOMEOSTASIS	16	-0.613065	-1.27979	0.15974	0.370456
GO_POSITIVE_REGULATION_OF_CELL_CYCLE_G1_S_PHASE_TRANSITION	38	-0.540869	-1.27958	0.12766	0.370621
GO_REGULATION_OF_EXECUTION_PHASE_OF_APOPTOSIS	23	-0.57316	-1.27893	0.162225	0.371947
GO_OVULATION_CYCLE	47	-0.522842	-1.27871	0.132905	0.372094
GO_ANIMAL_ORGAN_MATURATION	17	-0.601354	-1.27862	0.161006	0.371906
GO_WATER_SOLUBLE_VITAMIN_METABOLIC_PROCESS	67	-0.504633	-1.27845	0.115265	0.37195
GO_KIDNEY_MORPHOGENESIS	49	-0.72356	-1.76715	0	0.00646817
GO_POSITIVE_REGULATION_OF_DENDRITIC_SPINE_DEVELOPMENT	32	-0.535897	-1.27817	0.152318	0.371766
GO_REGULATION_OF_NEUROTRANSMITTER_TRANSPORT	68	-0.510173	-1.27817	0.0981211	0.371352
GO_GOLGI_VESICLE_BUDDING	76	-0.508848	-1.27681	0.0849741	0.374582
GO_SERINE_FAMILY_AMINO_ACID_METABOLIC_PROCESS	25	-0.585363	-1.27677	0.13866	0.374247
GO_REGULATION_OF_GLIAL_CELL_DIFFERENTIATION	40	-0.536396	-1.27668	0.133113	0.37407
GO_ORGAN_GROWTH	117	-0.674916	-1.76893	0	0.00641568
GO_THYMIC_T_CELL_SELECTION	16	-0.622642	-1.27602	0.170213	0.375019
GO_IRON_ION_HOMEOSTASIS	63	-0.516639	-1.27578	0.0983087	0.375271
GO_NEGATIVE_REGULATION_OF_SUPRAMOLECULAR_FIBER_ORGANIZATION	108	-0.490758	-1.27543	0.0696008	0.375782
GO_NEGATIVE_REGULATION_OF_LEUKOCYTE_APOPTOTIC_PROCESS	40	-0.543901	-1.27539	0.126106	0.375457
GO_NEGATIVE_REGULATION_OF_VIRAL_GENOME_REPLICATION	51	-0.522874	-1.27507	0.114255	0.375946
GO_POSITIVE_REGULATION_OF_HEART_GROWTH	29	-0.782351	-1.76941	0	0.00654625
GO_SYNAPSE_ASSEMBLY	86	-0.698925	-1.77554	0	0.00597482
GO_EMBRYONIC_ORGAN_MORPHOGENESIS	159	-0.679074	-1.77883	0	0.00570601
GO_IMPORT_INTO_CELL	130	-0.494822	-1.27389	0.0535354	0.377525
GO_EPITHELIAL_CELL_MORPHOGENESIS	26	-0.560558	-1.27354	0.160959	0.378078
GO_TRABECULA_FORMATION	16	-0.611271	-1.27353	0.162404	0.377662
GO_RENAL_WATER_HOMEOSTASIS	22	-0.584875	-1.27333	0.153197	0.377762
GO_PHOSPHATE_ION_TRANSPORT	19	-0.59047	-1.27294	0.174289	0.37836
GO_PRI_MIRNA_TRANSCRIPTION_BY_RNA_POLYMERASE_II	43	-0.526085	-1.27282	0.129244	0.378266
GO_AXIS_ELONGATION	17	-0.842935	-1.7893	0	0.00420315
GO_SYNAPTIC_VESICLE_EXOCYTOSIS	72	-0.498303	-1.27268	0.115505	0.377827
GO_NEURON_RECOGNITION	29	-0.556269	-1.27261	0.178366	0.377611
GO_CELLULAR_PIGMENTATION	46	-0.531497	-1.2721	0.134989	0.378598
GO_REGULATION_OF_PLATELET_ACTIVATION	28	-0.55875	-1.27138	0.160508	0.380172
GO_POSITIVE_REGULATION_OF_CYTOSOLIC_CALCIUM_ION_CONCENTRATION_INVOLVED_IN_PHOSPHOLIPASE_C_ACTIVATING_G_PROTEIN_COUPLED_SIGNALING_PATHWAY	18	-0.599361	-1.27053	0.170854	0.382044
GO_REGULATION_OF_NON_CANONICAL_WNT_SIGNALING_PATHWAY	19	-0.590135	-1.27051	0.190652	0.381659
GO_MUSCLE_CELL_APOPTOTIC_PROCESS	47	-0.527803	-1.26988	0.146237	0.382973
GO_PYRIMIDINE_NUCLEOSIDE_TRIPHOSPHATE_METABOLIC_PROCESS	18	-0.592966	-1.26945	0.193548	0.383732
GO_O_GLYCAN_PROCESSING	33	-0.545976	-1.26894	0.145289	0.384725
GO_REGULATION_OF_RENAL_SYSTEM_PROCESS	20	-0.584675	-1.26824	0.164808	0.386233
GO_POSITIVE_REGULATION_OF_DNA_METABOLIC_PROCESS	162	-0.482517	-1.26813	0.0521042	0.386091
GO_TRANSFORMING_GROWTH_FACTOR_BETA_RECEPTOR_SIGNALING_PATHWAY	151	-0.488159	-1.26787	0.0553877	0.386383
GO_LIVER_REGENERATION	24	-0.567911	-1.26758	0.178035	0.386768
GO_CEREBELLAR_PURKINJE_CELL_LAYER_DEVELOPMENT	20	-0.595581	-1.26753	0.173966	0.386456
GO_COLLAGEN_METABOLIC_PROCESS	67	-0.507171	-1.2673	0.102537	0.386709
GO_NON_CANONICAL_WNT_SIGNALING_PATHWAY	127	-0.490114	-1.26727	0.0705645	0.386352
GO_DNA_DAMAGE_RESPONSE_SIGNAL_TRANSDUCTION_RESULTING_IN_TRANSCRIPTION	16	-0.600159	-1.26692	0.185	0.386907
GO_COLLAGEN_FIBRIL_ORGANIZATION	42	-0.745606	-1.7897	0	0.00427857
GO_RETINOIC_ACID_RECEPTOR_SIGNALING_PATHWAY	24	-0.561273	-1.26506	0.178824	0.391265
GO_TRANSMISSION_OF_NERVE_IMPULSE	25	-0.561328	-1.26488	0.17217	0.391329
GO_DICARBOXYLIC_ACID_METABOLIC_PROCESS	69	-0.507224	-1.26453	0.111808	0.391866
GO_POSITIVE_REGULATION_OF_JUN_KINASE_ACTIVITY	59	-0.512833	-1.26442	0.110053	0.391711
GO_VESICLE_TARGETING	85	-0.49792	-1.26404	0.0925156	0.392317
GO_MICROTUBULE_ORGANIZING_CENTER_ORGANIZATION	121	-0.48597	-1.26363	0.0647118	0.393073
GO_REGULATION_OF_SPINDLE_ORGANIZATION	35	-0.538246	-1.26326	0.144796	0.393652
GO_REGULATION_OF_BONE_DEVELOPMENT	19	-0.585642	-1.26292	0.191304	0.394227
GO_PROTEIN_LOCALIZATION_TO_CELL_JUNCTION	63	-0.505192	-1.26275	0.124204	0.394256
GO_POSITIVE_REGULATION_OF_ANIMAL_ORGAN_MORPHOGENESIS	46	-0.739133	-1.79037	0	0.00429734
GO_ODONTOGENESIS	74	-0.709913	-1.79144	0	0.00428458
GO_OVULATION_CYCLE_PROCESS	32	-0.539649	-1.26007	0.163861	0.400482
GO_BODY_FLUID_SECRETION	57	-0.50702	-1.25991	0.139388	0.400495
GO_NEGATIVE_REGULATION_OF_RNA_CATABOLIC_PROCESS	45	-0.520799	-1.25987	0.137744	0.400176
GO_WNT_SIGNALING_PATHWAY_CALCIUM_MODULATING_PATHWAY	31	-0.544217	-1.25962	0.161916	0.400456
GO_NEGATIVE_REGULATION_OF_CELLULAR_PROTEIN_CATABOLIC_PROCESS	72	-0.501296	-1.25944	0.117032	0.40056
GO_MULTI_MULTICELLULAR_ORGANISM_PROCESS	139	-0.479532	-1.25878	0.0647773	0.401969
GO_BONE_REMODELING	66	-0.506341	-1.25831	0.132353	0.402891
GO_NAD_BIOSYNTHETIC_PROCESS	21	-0.578314	-1.25831	0.164663	0.402458
GO_RESPONSE_TO_LEPTIN	18	-0.580359	-1.25764	0.182609	0.403954
GO_ISOPRENOID_METABOLIC_PROCESS	76	-0.495411	-1.25748	0.110187	0.403964
GO_REGULATION_OF_CYTOKINESIS	68	-0.505258	-1.25735	0.138151	0.403903
GO_RESPONSE_TO_ESTRADIOL	94	-0.492716	-1.2571	0.0882051	0.404141
GO_BICARBONATE_TRANSPORT	19	-0.578443	-1.25692	0.206983	0.404178
GO_SENSORY_ORGAN_MORPHOGENESIS	145	-0.68692	-1.79675	0	0.00387426
GO_PLASMA_MEMBRANE_ORGANIZATION	79	-0.491028	-1.25657	0.111691	0.404326
GO_POSITIVE_REGULATION_OF_CELL_CYCLE_ARREST	70	-0.497788	-1.25577	0.128692	0.406196
GO_POSITIVE_REGULATION_OF_SMOOTH_MUSCLE_CELL_MIGRATION	31	-0.545084	-1.25527	0.16317	0.407194
GO_MITOTIC_SISTER_CHROMATID_COHESION	20	-0.59553	-1.25509	0.182692	0.40729
GO_HOMOPHILIC_CELL_ADHESION_VIA_PLASMA_MEMBRANE_ADHESION_MOLECULES	64	-0.728878	-1.79684	0	0.00398348
GO_VESICLE_TARGETING_TO_FROM_OR_WITHIN_GOLGI	69	-0.494432	-1.25498	0.117831	0.406717
GO_HEPATICOBILIARY_SYSTEM_DEVELOPMENT	108	-0.484984	-1.2548	0.0935252	0.406823
GO_INTERMEDIATE_FILAMENT_BASED_PROCESS	29	-0.787981	-1.80407	0	0.00352929
GO_RESPONSE_TO_LEUKEMIA_INHIBITORY_FACTOR	80	-0.495482	-1.2544	0.110196	0.407053
GO_ERBB2_SIGNALING_PATHWAY	25	-0.796612	-1.80483	0	0.003596
GO_POSITIVE_REGULATION_OF_TELOMERE_MAINTENANCE_VIA_TELOMERE_LENGTHENING	37	-0.534843	-1.25266	0.155505	0.41104
GO_ASPARTATE_FAMILY_AMINO_ACID_BIOSYNTHETIC_PROCESS	18	-0.580663	-1.25192	0.203008	0.412697
GO_NUCLEOSOME_ASSEMBLY	58	-0.508879	-1.25083	0.127119	0.415377
GO_MELANOCYTE_DIFFERENTIATION	17	-0.581206	-1.25072	0.21166	0.415266
GO_REGULATION_OF_CELL_AGING	41	-0.530509	-1.24935	0.157016	0.41881
GO_CELLULAR_RESPONSE_TO_OXYGEN_RADICAL	21	-0.568928	-1.24903	0.194411	0.419302
GO_POSITIVE_REGULATION_OF_PROTEIN_IMPORT	35	-0.544767	-1.24887	0.157471	0.419305
GO_POSITIVE_REGULATION_OF_PROTEIN_LOCALIZATION_TO_CELL_PERIPHERY	53	-0.507359	-1.24851	0.151805	0.419917
GO_ORGANELLE_TRANSPORT_ALONG_MICROTUBULE	71	-0.502188	-1.24786	0.127216	0.421444
GO_REGULATION_OF_CELL_CYCLE_ARREST	89	-0.495952	-1.24781	0.0988672	0.421125
GO_NEGATIVE_REGULATION_OF_CARDIAC_MUSCLE_TISSUE_DEVELOPMENT	25	-0.561223	-1.24765	0.180406	0.421189
GO_RESPONSE_TO_MECHANICAL_STIMULUS	144	-0.473181	-1.24736	0.0665994	0.421621
GO_REGULATION_OF_OXIDATIVE_PHOSPHORYLATION	24	-0.560179	-1.24717	0.185006	0.421703
GO_INSULIN_SECRETION	127	-0.47963	-1.24657	0.08308	0.423
GO_MONOVALENT_INORGANIC_CATION_HOMEOSTASIS	98	-0.486726	-1.24608	0.108495	0.423985
GO_POSITIVE_REGULATION_OF_DNA_BIOSYNTHETIC_PROCESS	64	-0.503324	-1.24582	0.14482	0.424283
GO_AMYLOID_BETA_FORMATION	34	-0.532795	-1.24441	0.162896	0.427984
GO_NEGATIVE_REGULATION_OF_PROTEIN_CONTAINING_COMPLEX_DISASSEMBLY	61	-0.500872	-1.24415	0.130712	0.428302
GO_ANAPHASE_PROMOTING_COMPLEX_DEPENDENT_CATABOLIC_PROCESS	77	-0.491993	-1.24415	0.133607	0.42786
GO_POSITIVE_REGULATION_OF_ACUTE_INFLAMMATORY_RESPONSE	22	-0.560663	-1.24392	0.201439	0.428082
GO_SOMATIC_STEM_CELL_POPULATION_MAINTENANCE	44	-0.511126	-1.2435	0.176724	0.428913
GO_POSITIVE_REGULATION_OF_PHOSPHOLIPASE_ACTIVITY	41	-0.521016	-1.24324	0.16302	0.429235
GO_RETROGRADE_VESICLE_MEDIATED_TRANSPORT_GOLGI_TO_ENDOPLASMIC_RETICULUM	81	-0.490285	-1.24313	0.122257	0.429124
GO_COPPER_ION_TRANSPORT	16	-0.592949	-1.24283	0.21767	0.429579
GO_NEGATIVE_REGULATION_OF_DNA_BINDING_TRANSCRIPTION_FACTOR_ACTIVITY	126	-0.479157	-1.24212	0.0802845	0.431279
GO_NEGATIVE_REGULATION_OF_LEUKOCYTE_MIGRATION	35	-0.528785	-1.24194	0.178853	0.431312
GO_NEGATIVE_REGULATION_OF_CELLULAR_RESPONSE_TO_TRANSFORMING_GROWTH_FACTOR_BETA_STIMULUS	64	-0.493114	-1.24158	0.148109	0.431875
GO_POSITIVE_REGULATION_OF_GLYCOPROTEIN_METABOLIC_PROCESS	21	-0.569916	-1.24092	0.210714	0.4334
GO_LIVER_MORPHOGENESIS	16	-0.586623	-1.24068	0.216667	0.433654
GO_NEGATIVE_REGULATION_OF_TISSUE_REMODELING	16	-0.591404	-1.24056	0.224747	0.433533
GO_REGULATION_OF_DNA_REPLICATION	96	-0.477731	-1.2402	0.118974	0.434244
GO_POSITIVE_REGULATION_OF_DNA_REPAIR	52	-0.504547	-1.24	0.154672	0.434362
GO_METANEPHROS_MORPHOGENESIS	17	-0.860846	-1.81852	0.00125628	0.00216199
GO_NEGATIVE_REGULATION_OF_FAT_CELL_DIFFERENTIATION	35	-0.526071	-1.23833	0.180089	0.438467
GO_BRANCHING_MORPHOGENESIS_OF_AN_EPITHELIAL_TUBE	94	-0.708766	-1.81976	0	0.00217556
GO_REGULATION_OF_RESPONSE_TO_REACTIVE_OXYGEN_SPECIES	29	-0.537095	-1.23682	0.197917	0.44206
GO_MESONEPHROS_DEVELOPMENT	55	-0.746156	-1.83391	0	0.00130516
GO_CYTOSKELETON_DEPENDENT_INTRACELLULAR_TRANSPORT	164	-0.470589	-1.23644	0.0732932	0.442319
GO_LOCOMOTORY_BEHAVIOR	107	-0.481436	-1.23644	0.0958206	0.441872
GO_NEGATIVE_REGULATION_OF_ACTIN_FILAMENT_DEPOLYMERIZATION	33	-0.538655	-1.23642	0.192661	0.441494
GO_DETECTION_OF_ABIOTIC_STIMULUS	58	-0.506106	-1.23595	0.15812	0.442422
GO_KERATINOCYTE_DIFFERENTIATION	90	-0.711202	-1.834	0	0.00136731
GO_POSITIVE_REGULATION_OF_DENDRITIC_SPINE_MORPHOGENESIS	15	-0.59265	-1.23502	0.228758	0.44421
GO_REGULATION_OF_MORPHOGENESIS_OF_A_BRANCHING_STRUCTURE	33	-0.774374	-1.8351	0	0.00138959
GO_POSITIVE_REGULATION_OF_CARDIAC_MUSCLE_CELL_DIFFERENTIATION	16	-0.585632	-1.23467	0.21875	0.44432
GO_REGULATION_OF_GRANULOCYTE_CHEMOTAXIS	38	-0.519666	-1.23463	0.194475	0.443974
GO_UNSATURATED_FATTY_ACID_BIOSYNTHETIC_PROCESS	42	-0.512502	-1.23377	0.178889	0.446084
GO_HETEROCHROMATIN_ORGANIZATION	44	-0.513014	-1.23357	0.167213	0.446232
GO_RESPONSE_TO_OXYGEN_RADICAL	24	-0.558429	-1.23331	0.196429	0.446597
GO_RESPONSE_TO_LITHIUM_ION	16	-0.596153	-1.23317	0.234257	0.446577
GO_REGULATION_OF_CELL_SUBSTRATE_ADHESION	156	-0.470539	-1.23212	0.0843373	0.44932
GO_HAIR_CELL_DIFFERENTIATION	27	-0.538158	-1.2321	0.22069	0.448902
GO_REGULATION_OF_MUSCLE_CONTRACTION	90	-0.483409	-1.23181	0.125638	0.449361
GO_REGULATION_OF_RHO_PROTEIN_SIGNAL_TRANSDUCTION	63	-0.487205	-1.23059	0.158447	0.452437
GO_POSITIVE_REGULATION_OF_HORMONE_SECRETION	78	-0.486078	-1.23052	0.135135	0.452185
GO_POSITIVE_REGULATION_OF_MULTICELLULAR_ORGANISM_GROWTH	19	-0.565922	-1.23032	0.221818	0.452373
GO_NEGATIVE_REGULATION_OF_NOTCH_SIGNALING_PATHWAY	26	-0.551668	-1.2302	0.210654	0.452263
GO_REGULATION_OF_PROTEIN_LOCALIZATION_TO_CELL_SURFACE	33	-0.524878	-1.22853	0.197166	0.456788
GO_REGULATION_OF_LEUKOCYTE_CHEMOTAXIS	88	-0.476705	-1.22847	0.142127	0.456508
GO_REGULATION_OF_MEMBRANE_PERMEABILITY	71	-0.487557	-1.22847	0.138186	0.456081
GO_MITOTIC_RECOMBINATION	20	-0.566249	-1.22828	0.222357	0.456181
GO_REGULATION_OF_CELL_SHAPE	131	-0.469114	-1.22787	0.0928355	0.456929
GO_SKIN_DEVELOPMENT	169	-0.721038	-1.89042	0	0.000145567
GO_REGULATION_OF_STEM_CELL_DIFFERENTIATION	96	-0.480949	-1.22711	0.117227	0.458327
GO_DIENCEPHALON_DEVELOPMENT	25	-0.544979	-1.2264	0.205251	0.460044
GO_CALCIUM_DEPENDENT_CELL_CELL_ADHESION_VIA_PLASMA_MEMBRANE_CELL_ADHESION_MOLECULES	16	-0.583393	-1.22589	0.220779	0.461094
GO_DIOL_METABOLIC_PROCESS	20	-0.56941	-1.22526	0.211043	0.462525
GO_REGULATION_OF_SYNAPTIC_TRANSMISSION_GABAERGIC	16	-0.586121	-1.22512	0.234994	0.462456
GO_POSITIVE_REGULATION_OF_CELL_JUNCTION_ASSEMBLY	54	-0.493753	-1.2244	0.170551	0.464139
GO_RHO_PROTEIN_SIGNAL_TRANSDUCTION	99	-0.474962	-1.22402	0.111917	0.464815
GO_NEUROTRANSMITTER_UPTAKE	16	-0.58	-1.22349	0.239327	0.466026
GO_POSITIVE_REGULATION_OF_LEUKOCYTE_APOPTOTIC_PROCESS	25	-0.543706	-1.22324	0.222494	0.466293
GO_NEGATIVE_REGULATION_OF_VIRAL_TRANSCRIPTION	22	-0.561089	-1.22243	0.210399	0.468314
GO_NEGATIVE_REGULATION_OF_CELL_GROWTH	134	-0.470014	-1.22233	0.106383	0.468179
GO_MUSCLE_FILAMENT_SLIDING	16	-0.583465	-1.22225	0.246173	0.467959
GO_MYOBLAST_FUSION	25	-0.540531	-1.2216	0.206897	0.469421
GO_REGULATION_OF_COAGULATION	61	-0.490996	-1.22125	0.161563	0.469998
GO_REGULATION_OF_ENDOPLASMIC_RETICULUM_UNFOLDED_PROTEIN_RESPONSE	25	-0.547009	-1.22123	0.230216	0.469592
GO_DEVELOPMENTAL_MATURATION	176	-0.468564	-1.2211	0.0621866	0.46948
GO_NEGATIVE_REGULATION_OF_HEMOPOIESIS	104	-0.472837	-1.22096	0.131282	0.469462
GO_RESPONSE_TO_GLUCAGON	20	-0.557256	-1.22095	0.222778	0.46906
GO_REGULATION_OF_JUN_KINASE_ACTIVITY	70	-0.48603	-1.22091	0.171579	0.468704
GO_REGULATION_OF_DOUBLE_STRAND_BREAK_REPAIR	64	-0.490284	-1.22054	0.166493	0.469391
GO_NEGATIVE_REGULATION_OF_LYMPHOCYTE_ACTIVATION	112	-0.473627	-1.22041	0.114721	0.469351
GO_SMOOTH_MUSCLE_CELL_DIFFERENTIATION	37	-0.51587	-1.2204	0.216216	0.468909
GO_ADULT_LOCOMOTORY_BEHAVIOR	43	-0.50895	-1.2203	0.193296	0.468743
GO_ACTIN_CYTOSKELETON_REORGANIZATION	86	-0.480172	-1.22023	0.150515	0.468497
GO_BASE_EXCISION_REPAIR	40	-0.514465	-1.21933	0.192982	0.470757
GO_MODULATION_BY_HOST_OF_SYMBIONT_PROCESS	50	-0.496493	-1.21932	0.194384	0.47034
GO_NEUROMUSCULAR_PROCESS	53	-0.494844	-1.21905	0.19027	0.470682
GO_ANTEROGRADE_AXONAL_TRANSPORT	36	-0.515362	-1.21887	0.204241	0.470787
GO_MYOTUBE_DIFFERENTIATION	61	-0.485975	-1.21815	0.182965	0.472595
GO_IMPORT_ACROSS_PLASMA_MEMBRANE	88	-0.479594	-1.21801	0.142712	0.472584
GO_POSITIVE_REGULATION_OF_LAMELLIPODIUM_ASSEMBLY	18	-0.570271	-1.21774	0.225527	0.472954
GO_RESPONSE_TO_ALCOHOL	153	-0.465471	-1.21774	0.0963855	0.472499
GO_MITOCHONDRIAL_GENOME_MAINTENANCE	22	-0.552976	-1.2177	0.224221	0.472162
GO_RESPONSE_TO_KETONE	138	-0.467401	-1.21758	0.105157	0.472088
GO_POSITIVE_REGULATION_OF_SUBSTRATE_ADHESION_DEPENDENT_CELL_SPREADING	29	-0.52632	-1.21716	0.22659	0.472992
GO_RESPONSE_TO_FLUID_SHEAR_STRESS	31	-0.519439	-1.21645	0.21542	0.474754
GO_RETINA_VASCULATURE_DEVELOPMENT_IN_CAMERA_TYPE_EYE	15	-0.596325	-1.21614	0.253595	0.475213
GO_OLIGOSACCHARIDE_METABOLIC_PROCESS	36	-0.51315	-1.21614	0.20904	0.474764
GO_LACTATION	35	-0.513703	-1.21544	0.227064	0.476415
GO_REGULATION_OF_LEUKOCYTE_APOPTOTIC_PROCESS	71	-0.480083	-1.21537	0.175	0.476196
GO_PEPTIDYL_THREONINE_MODIFICATION	99	-0.474679	-1.21518	0.131365	0.476313
GO_CELLULAR_RESPONSE_TO_IONIZING_RADIATION	59	-0.489815	-1.21492	0.168803	0.476644
GO_EAR_MORPHOGENESIS	61	-0.769832	-1.89887	0	5.09639e-05
GO_SODIUM_ION_TRANSPORT	108	-0.469919	-1.21376	0.117828	0.479257
GO_TELOMERE_CAPPING	37	-0.509978	-1.21334	0.208989	0.480056
GO_REGULATION_OF_VIRAL_GENOME_REPLICATION	85	-0.47444	-1.21249	0.164271	0.482203
GO_POSITIVE_REGULATION_OF_MUSCLE_CONTRACTION	24	-0.549212	-1.21209	0.233611	0.483015
GO_REPLICATION_FORK_PROCESSING	28	-0.534121	-1.21101	0.261933	0.485849
GO_SODIUM_ION_TRANSMEMBRANE_TRANSPORT	80	-0.47887	-1.21094	0.144491	0.485579
GO_POSITIVE_REGULATION_OF_PROTEIN_LOCALIZATION_TO_NUCLEUS	68	-0.486311	-1.21093	0.183738	0.485148
GO_RUFFLE_ASSEMBLY	36	-0.520739	-1.21087	0.206047	0.484879
GO_GLYCOPROTEIN_BIOSYNTHETIC_PROCESS	241	-0.459219	-1.21028	0.0560561	0.486227
GO_POSITIVE_REGULATION_OF_SMOOTH_MUSCLE_CONTRACTION	16	-0.59595	-1.21026	0.243038	0.485826
GO_EXIT_FROM_MITOSIS	25	-0.533062	-1.21024	0.230496	0.48543
GO_NEGATIVE_REGULATION_OF_PROTEIN_POLYMERIZATION	55	-0.487988	-1.20996	0.195096	0.485841
GO_REGULATION_OF_LYMPHOCYTE_CHEMOTAXIS	17	-0.574431	-1.20975	0.247487	0.48601
GO_HORMONE_TRANSPORT	190	-0.460969	-1.20929	0.0742227	0.48693
GO_POSITIVE_REGULATION_OF_MULTI_ORGANISM_PROCESS	24	-0.544582	-1.20906	0.239286	0.487163
GO_ANIMAL_ORGAN_FORMATION	35	-0.808181	-1.90493	0	0
GO_REGULATION_OF_TELOMERE_MAINTENANCE_VIA_TELOMERE_LENGTHENING	56	-0.487039	-1.20852	0.176408	0.487917
GO_NEGATIVE_REGULATION_OF_ACTIN_FILAMENT_BUNDLE_ASSEMBLY	23	-0.547473	-1.20746	0.234803	0.490805
GO_PEPTIDYL_TYROSINE_MODIFICATION	271	-0.455219	-1.20601	0.053053	0.49482
GO_SYNCYTIUM_FORMATION	36	-0.513406	-1.20516	0.232481	0.49704
GO_HEART_PROCESS	154	-0.457417	-1.20491	0.106963	0.497395
GO_REGULATION_OF_DOUBLE_STRAND_BREAK_REPAIR_VIA_NONHOMOLOGOUS_END_JOINING	20	-0.547525	-1.20415	0.236429	0.499296
GO_NEGATIVE_REGULATION_OF_SIGNAL_TRANSDUCTION_IN_ABSENCE_OF_LIGAND	24	-0.532105	-1.20407	0.247286	0.499098
GO_REGULATION_OF_BONE_REMODELING	37	-0.505204	-1.20405	0.219595	0.498677
GO_EPITHELIAL_CELL_DEVELOPMENT	154	-0.459091	-1.20396	0.112563	0.498461
GO_REGULATION_OF_CHEMOTAXIS	153	-0.460511	-1.20368	0.10303	0.49888
GO_DNA_DEPENDENT_DNA_REPLICATION_MAINTENANCE_OF_FIDELITY	37	-0.511802	-1.20354	0.207014	0.498852
GO_NEGATIVE_REGULATION_OF_SMOOTHENED_SIGNALING_PATHWAY	22	-0.548193	-1.20352	0.244823	0.498474
GO_CELLULAR_PROCESS_INVOLVED_IN_REPRODUCTION_IN_MULTICELLULAR_ORGANISM	194	-0.455467	-1.20348	0.0803213	0.498111
GO_NEGATIVE_REGULATION_OF_CARDIAC_MUSCLE_TISSUE_GROWTH	19	-0.551669	-1.20338	0.22963	0.497997
GO_REGULATION_OF_MYOBLAST_DIFFERENTIATION	32	-0.515815	-1.20326	0.228637	0.497886
GO_BODY_MORPHOGENESIS	34	-0.511707	-1.20193	0.21814	0.501523
GO_REGULATION_OF_OLIGODENDROCYTE_DIFFERENTIATION	23	-0.541006	-1.20178	0.243787	0.501553
GO_POSITIVE_REGULATION_OF_PEPTIDYL_TYROSINE_PHOSPHORYLATION	127	-0.46125	-1.20147	0.132457	0.502045
GO_MICROVILLUS_ASSEMBLY	15	-0.585558	-1.20145	0.253866	0.501629
GO_PROTEIN_PROCESSING	143	-0.459974	-1.20109	0.117172	0.502331
GO_MITOTIC_G1_S_TRANSITION_CHECKPOINT	59	-0.483899	-1.20106	0.196617	0.501995
GO_PRESYNAPSE_ORGANIZATION	23	-0.548924	-1.20086	0.247914	0.502136
GO_RECEPTOR_CATABOLIC_PROCESS	33	-0.515878	-1.20061	0.215576	0.502465
GO_ANION_TRANSMEMBRANE_TRANSPORT	172	-0.460529	-1.20048	0.0953815	0.50243
GO_REGULATION_OF_PROTEIN_DEPOLYMERIZATION	67	-0.475488	-1.19821	0.192025	0.509082
GO_POSITIVE_REGULATION_OF_TYROSINE_PHOSPHORYLATION_OF_STAT_PROTEIN	37	-0.510157	-1.1982	0.230599	0.508646
GO_RESPONSE_TO_PROGESTERONE	32	-0.511503	-1.19781	0.222599	0.509451
GO_TISSUE_MIGRATION	221	-0.456056	-1.19773	0.0822467	0.509223
GO_QUINONE_METABOLIC_PROCESS	26	-0.53092	-1.19758	0.255196	0.509262
GO_PLATELET_AGGREGATION	47	-0.494834	-1.19719	0.221111	0.510053
GO_GERM_CELL_DEVELOPMENT	134	-0.461111	-1.197	0.116162	0.510184
GO_RENAL_FILTRATION	18	-0.560331	-1.19678	0.258303	0.510457
GO_REGULATION_OF_EPITHELIAL_CELL_MIGRATION	169	-0.455514	-1.19677	0.113113	0.509999
GO_RECEPTOR_LOCALIZATION_TO_SYNAPSE	32	-0.514664	-1.19544	0.22815	0.513779
GO_DORSAL_VENTRAL_NEURAL_TUBE_PATTERNING	16	-0.565926	-1.19504	0.264295	0.514597
GO_STRIATED_MUSCLE_CONTRACTION	95	-0.468326	-1.19448	0.163767	0.515902
GO_POSITIVE_REGULATION_OF_AMYLOID_BETA_FORMATION	16	-0.572261	-1.19436	0.25625	0.515789
GO_REGULATION_OF_MEMBRANE_POTENTIAL	215	-0.450957	-1.19417	0.091	0.515915
GO_POSITIVE_REGULATION_OF_CELL_SUBSTRATE_ADHESION	86	-0.474822	-1.1941	0.1639	0.515667
GO_POSITIVE_REGULATION_OF_NERVOUS_SYSTEM_PROCESS	36	-0.507689	-1.19403	0.245132	0.515406
GO_INNER_EAR_MORPHOGENESIS	51	-0.778345	-1.91935	0	0
GO_KERATINIZATION	34	-0.846962	-1.95898	0	0
GO_POSITIVE_REGULATION_OF_EPITHELIAL_CELL_PROLIFERATION	127	-0.456578	-1.19259	0.15275	0.518577
GO_INTERSTRAND_CROSS_LINK_REPAIR	45	-0.489519	-1.19248	0.229236	0.51845
GO_REGULATION_OF_RUFFLE_ASSEMBLY	24	-0.532857	-1.19244	0.246098	0.518109
GO_KERATAN_SULFATE_METABOLIC_PROCESS	23	-0.538673	-1.19197	0.26259	0.519203
GO_REGULATION_OF_SUPEROXIDE_METABOLIC_PROCESS	27	-0.519532	-1.1919	0.245902	0.518938
GO_KERATAN_SULFATE_BIOSYNTHETIC_PROCESS	18	-0.558687	-1.19151	0.240741	0.519723
GO_NEGATIVE_REGULATION_OF_CELL_SUBSTRATE_ADHESION	49	-0.486428	-1.19121	0.222101	0.520199
GO_VASCULOGENESIS	58	-0.482104	-1.19075	0.217112	0.52114
GO_CELL_CELL_ADHESION_MEDIATED_BY_CADHERIN	19	-0.550281	-1.19066	0.267399	0.520958
GO_SENSORY_PERCEPTION_OF_LIGHT_STIMULUS	88	-0.467683	-1.1894	0.194845	0.524468
GO_PROTEIN_O_LINKED_GLYCOSYLATION	65	-0.475018	-1.18922	0.217666	0.524611
GO_AMINOGLYCAN_BIOSYNTHETIC_PROCESS	82	-0.46763	-1.18913	0.208595	0.524417
GO_REGULATION_OF_DOUBLE_STRAND_BREAK_REPAIR_VIA_HOMOLOGOUS_RECOMBINATION	36	-0.502507	-1.18876	0.246085	0.525138
GO_PIGMENT_BIOSYNTHETIC_PROCESS	44	-0.493496	-1.18828	0.231285	0.52616
GO_NEUROMUSCULAR_PROCESS_CONTROLLING_BALANCE	30	-0.51384	-1.18827	0.27283	0.525722
GO_NEGATIVE_REGULATION_OF_DEFENSE_RESPONSE_TO_VIRUS	21	-0.544867	-1.18796	0.27096	0.526203
GO_POSITIVE_REGULATION_OF_CELLULAR_RESPONSE_TO_TRANSFORMING_GROWTH_FACTOR_BETA_STIMULUS	24	-0.530958	-1.18765	0.26747	0.526726
GO_POSITIVE_REGULATION_OF_UBIQUITIN_PROTEIN_TRANSFERASE_ACTIVITY	31	-0.509692	-1.18758	0.235088	0.526495
GO_REGULATION_OF_MUSCLE_CELL_DIFFERENTIATION	108	-0.460137	-1.18737	0.166327	0.526733
GO_RUFFLE_ORGANIZATION	46	-0.490899	-1.18681	0.22658	0.528037
GO_UNSATURATED_FATTY_ACID_METABOLIC_PROCESS	70	-0.469987	-1.1867	0.206499	0.527914
GO_POSITIVE_REGULATION_OF_EMBRYONIC_DEVELOPMENT	19	-0.558966	-1.18646	0.265509	0.528213
GO_CEREBRAL_CORTEX_RADIALLY_ORIENTED_CELL_MIGRATION	20	-0.549505	-1.18591	0.270202	0.529502
GO_PROTEIN_LOCALIZATION_TO_MICROTUBULE	16	-0.557453	-1.18573	0.258732	0.52954
GO_FACE_DEVELOPMENT	36	-0.510263	-1.18501	0.259386	0.531339
GO_PYRIMIDINE_NUCLEOSIDE_TRIPHOSPHATE_BIOSYNTHETIC_PROCESS	15	-0.57089	-1.18484	0.28535	0.531355
GO_REGULATION_OF_HORMONE_LEVELS	284	-0.448419	-1.18461	0.062	0.531626
GO_NEUTRAL_AMINO_ACID_TRANSPORT	25	-0.528433	-1.1844	0.267148	0.531883
GO_POSITIVE_REGULATION_OF_PRI_MIRNA_TRANSCRIPTION_BY_RNA_POLYMERASE_II	33	-0.507698	-1.18428	0.247178	0.531758
GO_POSITIVE_REGULATION_OF_PEPTIDE_HORMONE_SECRETION	57	-0.482383	-1.18424	0.207188	0.531385
GO_CALCIUM_ION_IMPORT	42	-0.489902	-1.18412	0.233333	0.531306
GO_PHAGOSOME_ACIDIFICATION	24	-0.5317	-1.18389	0.26555	0.531541
GO_ACUTE_INFLAMMATORY_RESPONSE	69	-0.47543	-1.18378	0.2	0.531439
GO_REGULATION_OF_BODY_FLUID_LEVELS	321	-0.446495	-1.18347	0.066	0.531958
GO_REGULATION_OF_LONG_TERM_SYNAPTIC_POTENTIATION	32	-0.51584	-1.18274	0.254608	0.533906
GO_CILIUM_ORGANIZATION	282	-0.447736	-1.18167	0.068	0.536808
GO_STRESS_FIBER_ASSEMBLY	85	-0.469763	-1.18151	0.187947	0.536847
GO_POSITIVE_REGULATION_OF_RESPONSE_TO_DNA_DAMAGE_STIMULUS	81	-0.462922	-1.18146	0.188601	0.536519
GO_RESPONSE_TO_INTERFERON_ALPHA	17	-0.55563	-1.18111	0.287356	0.537203
GO_REGULATION_OF_CENTROSOME_CYCLE	53	-0.481557	-1.18065	0.221498	0.538142
GO_REGULATION_OF_ASTROCYTE_DIFFERENTIATION	16	-0.562973	-1.179	0.266922	0.542898
GO_REGULATION_OF_PHOSPHOLIPASE_ACTIVITY	49	-0.487904	-1.17892	0.228632	0.542645
GO_CORNIFICATION	31	-0.839436	-1.9615	0	0
GO_CELLULAR_RESPONSE_TO_FLUID_SHEAR_STRESS	17	-0.556864	-1.17825	0.276215	0.543816
GO_RESPONSE_TO_GAMMA_RADIATION	48	-0.48894	-1.17818	0.245937	0.543551
GO_MESENCHYME_MORPHOGENESIS	28	-0.521065	-1.1781	0.265425	0.543329
GO_ACTIVATION_OF_GTPASE_ACTIVITY	79	-0.468548	-1.17772	0.198758	0.544124
GO_VESICLE_TRANSPORT_ALONG_MICROTUBULE	40	-0.49295	-1.17768	0.243392	0.543802
GO_DEVELOPMENTAL_PIGMENTATION	32	-0.498723	-1.17761	0.254566	0.543545
GO_AMINO_ACID_TRANSPORT	87	-0.461085	-1.17678	0.196738	0.545761
GO_NEGATIVE_REGULATION_OF_RHO_PROTEIN_SIGNAL_TRANSDUCTION	18	-0.550699	-1.17668	0.289604	0.54561
GO_NEGATIVE_REGULATION_OF_PEPTIDYL_THREONINE_PHOSPHORYLATION	16	-0.569995	-1.1766	0.279693	0.545373
GO_PIGMENT_METABOLIC_PROCESS	51	-0.477119	-1.17653	0.252711	0.545158
GO_PYRIMIDINE_DEOXYRIBONUCLEOTIDE_METABOLIC_PROCESS	18	-0.555155	-1.17638	0.279213	0.545163
GO_REGULATION_OF_DNA_METABOLIC_PROCESS	282	-0.445048	-1.176	0.0641283	0.545939
GO_GANGLIOSIDE_METABOLIC_PROCESS	17	-0.562473	-1.17593	0.281529	0.545685
GO_GAMMA_DELTA_T_CELL_ACTIVATION	15	-0.577118	-1.17547	0.26962	0.546677
GO_MYELOID_LEUKOCYTE_MIGRATION	153	-0.446624	-1.17481	0.142137	0.548332
GO_MYOBLAST_DIFFERENTIATION	56	-0.484879	-1.17477	0.216187	0.547966
GO_HYPEROSMOTIC_RESPONSE	21	-0.533344	-1.17477	0.275485	0.547503
GO_RHYTHMIC_PROCESS	215	-0.44277	-1.17428	0.102	0.548648
GO_REGULATION_OF_PROTEIN_KINASE_A_SIGNALING	19	-0.54152	-1.17423	0.261557	0.54835
GO_MISMATCH_REPAIR	28	-0.518351	-1.17372	0.276146	0.549578
GO_REGULATION_OF_PROTEIN_TYROSINE_KINASE_ACTIVITY	72	-0.46332	-1.17361	0.235979	0.549491
GO_ERBB_SIGNALING_PATHWAY	113	-0.454071	-1.17283	0.185787	0.551594
GO_ANATOMICAL_STRUCTURE_MATURATION	140	-0.449132	-1.17283	0.171859	0.551124
GO_RESPONSE_TO_CHEMOKINE	58	-0.47824	-1.17266	0.21828	0.551196
GO_NEGATIVE_REGULATION_OF_MRNA_METABOLIC_PROCESS	64	-0.47336	-1.17199	0.227608	0.552914
GO_INORGANIC_ION_IMPORT_ACROSS_PLASMA_MEMBRANE	45	-0.480472	-1.17197	0.2443	0.552495
GO_MIDBODY_ABSCISSION	16	-0.554772	-1.17185	0.304847	0.552395
GO_NEGATIVE_REGULATION_OF_HORMONE_SECRETION	35	-0.496675	-1.17172	0.259343	0.552346
GO_POSITIVE_REGULATION_OF_INSULIN_SECRETION	49	-0.474935	-1.17151	0.237013	0.552524
GO_INTERACTION_WITH_SYMBIONT	60	-0.472055	-1.17127	0.234727	0.552893
GO_REGULATION_OF_SKELETAL_MUSCLE_TISSUE_DEVELOPMENT	24	-0.529481	-1.17109	0.290629	0.552982
GO_RESPONSE_TO_TOXIC_SUBSTANCE	162	-0.445897	-1.17086	0.143001	0.55327
GO_REGULATION_OF_INTRACELLULAR_ESTROGEN_RECEPTOR_SIGNALING_PATHWAY	31	-0.502991	-1.17022	0.264407	0.554902
GO_REGULATION_OF_NIK_NF_KAPPAB_SIGNALING	92	-0.460108	-1.17006	0.210634	0.55495
GO_NEGATIVE_REGULATION_OF_CELL_ACTIVATION	147	-0.445914	-1.16982	0.138524	0.555261
GO_VITAMIN_TRANSPORT	26	-0.517327	-1.16974	0.283893	0.555049
GO_MUSCLE_CONTRACTION	194	-0.447077	-1.16938	0.13013	0.555767
GO_REGULATION_OF_SPINDLE_ASSEMBLY	23	-0.523611	-1.16936	0.279042	0.555361
GO_ENDOTHELIAL_CELL_CHEMOTAXIS	20	-0.539575	-1.16899	0.284493	0.556109
GO_REGULATION_OF_PRODUCTION_OF_SMALL_RNA_INVOLVED_IN_GENE_SILENCING_BY_RNA	19	-0.540343	-1.16859	0.281707	0.556942
GO_DETECTION_OF_STIMULUS	137	-0.452276	-1.16818	0.169184	0.557819
GO_HEMATOPOIETIC_STEM_CELL_PROLIFERATION	20	-0.535891	-1.16714	0.294192	0.560755
GO_NEGATIVE_REGULATION_OF_NEURON_APOPTOTIC_PROCESS	96	-0.456989	-1.16693	0.195072	0.560926
GO_LEUKOCYTE_CELL_CELL_ADHESION	275	-0.44198	-1.1666	0.097	0.561572
GO_POSITIVE_REGULATION_OF_LIPASE_ACTIVITY	48	-0.47957	-1.16649	0.267327	0.561477
GO_ORGANIC_HYDROXY_COMPOUND_BIOSYNTHETIC_PROCESS	166	-0.445106	-1.16538	0.144578	0.564672
GO_PROTEIN_LOCALIZATION_TO_CYTOSKELETON	52	-0.477926	-1.16533	0.243041	0.564372
GO_CELLULAR_RESPONSE_TO_TOXIC_SUBSTANCE	79	-0.458232	-1.16511	0.226474	0.564635
GO_POSITIVE_REGULATION_OF_MONOOXYGENASE_ACTIVITY	21	-0.535115	-1.16501	0.287105	0.564477
GO_PIGMENT_CELL_DIFFERENTIATION	27	-0.51456	-1.16447	0.291569	0.565802
GO_SENSORY_PERCEPTION_OF_CHEMICAL_STIMULUS	26	-0.512611	-1.16382	0.307876	0.567461
GO_PROTEIN_HYDROXYLATION	19	-0.539919	-1.16251	0.293168	0.57116
GO_CELL_MATURATION	102	-0.451738	-1.16228	0.213115	0.571479
GO_REGULATION_OF_CHROMOSOME_ORGANIZATION	293	-0.442006	-1.16208	0.097	0.571668
GO_POSITIVE_REGULATION_OF_TELOMERE_MAINTENANCE	48	-0.473531	-1.16198	0.259501	0.571529
GO_CELL_SUBSTRATE_JUNCTION_ORGANIZATION	88	-0.460756	-1.16151	0.221881	0.572642
GO_REGULATION_OF_NATURAL_KILLER_CELL_MEDIATED_IMMUNITY	25	-0.515799	-1.16135	0.276546	0.572684
GO_CELLULAR_OXIDANT_DETOXIFICATION	67	-0.460868	-1.16111	0.234672	0.572979
GO_GAMETE_GENERATION	384	-0.43826	-1.16108	0.062	0.572611
GO_REGULATION_OF_NOTCH_SIGNALING_PATHWAY	72	-0.465024	-1.15999	0.24433	0.57579
GO_HEPARAN_SULFATE_PROTEOGLYCAN_METABOLIC_PROCESS	25	-0.509943	-1.15999	0.290954	0.575316
GO_REGULATION_OF_BICELLULAR_TIGHT_JUNCTION_ASSEMBLY	21	-0.529437	-1.15991	0.301956	0.575076
GO_REGULATION_OF_GLIOGENESIS	74	-0.459116	-1.15977	0.244283	0.575042
GO_SPERMATID_DIFFERENTIATION	75	-0.461139	-1.15954	0.240876	0.575358
GO_REGULATION_OF_EXTRINSIC_APOPTOTIC_SIGNALING_PATHWAY_IN_ABSENCE_OF_LIGAND	34	-0.492841	-1.15903	0.282139	0.576576
GO_OVARIAN_FOLLICLE_DEVELOPMENT	39	-0.486571	-1.1581	0.268238	0.579266
GO_RESPONSE_TO_PLATELET_DERIVED_GROWTH_FACTOR	16	-0.552941	-1.15799	0.299738	0.579155
GO_TELOMERE_MAINTENANCE_VIA_TELOMERE_LENGTHENING	72	-0.462673	-1.15782	0.24659	0.579234
GO_REGULATION_OF_PROTEIN_LOCALIZATION_TO_PLASMA_MEMBRANE	80	-0.454425	-1.15753	0.227888	0.579685
GO_REGULATION_OF_NEUTROPHIL_MIGRATION	34	-0.497062	-1.1573	0.272933	0.579998
GO_INOSITOL_LIPID_MEDIATED_SIGNALING	139	-0.442381	-1.15713	0.205853	0.580087
GO_REGULATION_OF_MONOOXYGENASE_ACTIVITY	40	-0.480082	-1.1571	0.285557	0.579701
GO_NEGATIVE_REGULATION_OF_PEPTIDE_HORMONE_SECRETION	21	-0.523075	-1.15616	0.302122	0.582358
GO_AORTA_MORPHOGENESIS	22	-0.528849	-1.15579	0.29661	0.583159
GO_REGULATION_OF_ACTOMYOSIN_STRUCTURE_ORGANIZATION	77	-0.457327	-1.15553	0.238095	0.583551
GO_REGULATION_OF_CELL_CYCLE_G1_S_PHASE_TRANSITION	147	-0.44482	-1.15542	0.176946	0.583472
GO_NEGATIVE_REGULATION_OF_PROTEIN_CONTAINING_COMPLEX_ASSEMBLY	102	-0.447983	-1.15489	0.215666	0.584726
GO_REGULATION_OF_ORGANELLE_ASSEMBLY	156	-0.441549	-1.1545	0.158794	0.585522
GO_RESPONSE_TO_HYPEROXIA	16	-0.544111	-1.15435	0.297954	0.585545
GO_CELLULAR_RESPONSE_TO_OXYGEN_LEVELS	180	-0.4376	-1.15358	0.166834	0.58763
GO_CARDIAC_ATRIUM_DEVELOPMENT	17	-0.547069	-1.1531	0.305623	0.588767
GO_REGULATION_OF_MONOCYTE_CHEMOTAXIS	20	-0.536498	-1.15309	0.321046	0.588342
GO_REGULATION_OF_CARDIAC_MUSCLE_CELL_DIFFERENTIATION	30	-0.50323	-1.15307	0.283721	0.587913
GO_ANTIGEN_PROCESSING_AND_PRESENTATION_OF_PEPTIDE_ANTIGEN	176	-0.437978	-1.15271	0.179074	0.588594
GO_MICROTUBULE_BASED_MOVEMENT	228	-0.440294	-1.15263	0.134	0.588414
GO_POSITIVE_REGULATION_OF_CALCIUM_ION_TRANSPORT	72	-0.455169	-1.15166	0.248175	0.591159
GO_RNA_DEPENDENT_DNA_BIOSYNTHETIC_PROCESS	65	-0.460085	-1.1515	0.255591	0.591203
GO_TELOMERE_ORGANIZATION	135	-0.442452	-1.15043	0.194949	0.594305
GO_NEGATIVE_REGULATION_OF_CELL_CYCLE_G1_S_PHASE_TRANSITION	97	-0.445963	-1.15022	0.221429	0.594522
GO_INSULIN_SECRETION_INVOLVED_IN_CELLULAR_RESPONSE_TO_GLUCOSE_STIMULUS	43	-0.476527	-1.14969	0.279698	0.59583
GO_REGULATION_OF_CALCIUM_MEDIATED_SIGNALING	63	-0.460918	-1.14933	0.273114	0.596537
GO_PYRIMIDINE_NUCLEOTIDE_METABOLIC_PROCESS	38	-0.486426	-1.14827	0.290788	0.599595
GO_DIOL_BIOSYNTHETIC_PROCESS	18	-0.527423	-1.14794	0.304511	0.600214
GO_POSITIVE_REGULATION_OF_INSULIN_SECRETION_INVOLVED_IN_CELLULAR_RESPONSE_TO_GLUCOSE_STIMULUS	21	-0.525541	-1.14788	0.291872	0.599938
GO_POSITIVE_REGULATION_OF_CELLULAR_COMPONENT_MOVEMENT	403	-0.428725	-1.14729	0.084	0.601473
GO_CARBOHYDRATE_DERIVATIVE_BIOSYNTHETIC_PROCESS	478	-0.431131	-1.1472	0.06	0.601273
GO_REGULATION_OF_DEFENSE_RESPONSE_TO_VIRUS_BY_VIRUS	29	-0.506419	-1.1468	0.318807	0.602214
GO_FATTY_ACYL_COA_METABOLIC_PROCESS	29	-0.500115	-1.14626	0.29634	0.603518
GO_CELL_COMMUNICATION_BY_ELECTRICAL_COUPLING	19	-0.532501	-1.14534	0.322864	0.606063
GO_REGULATION_OF_CALCIUM_ION_DEPENDENT_EXOCYTOSIS	22	-0.520459	-1.14531	0.315789	0.605686
GO_NEGATIVE_REGULATION_OF_RESPONSE_TO_DNA_DAMAGE_STIMULUS	69	-0.452904	-1.14478	0.26999	0.606986
GO_REGULATION_OF_ACUTE_INFLAMMATORY_RESPONSE	34	-0.488968	-1.14475	0.314088	0.606625
GO_PROTEIN_AUTOPHOSPHORYLATION	197	-0.434563	-1.14473	0.172	0.60622
GO_REGULATION_OF_T_CELL_RECEPTOR_SIGNALING_PATHWAY	35	-0.487478	-1.1446	0.290909	0.606187
GO_SYNAPTIC_SIGNALING	390	-0.431054	-1.14406	0.092	0.607529
GO_POSITIVE_REGULATION_OF_T_CELL_PROLIFERATION	79	-0.449707	-1.14241	0.26178	0.612479
GO_CELLULAR_ION_HOMEOSTASIS	405	-0.430375	-1.1415	0.077	0.615081
GO_NEGATIVE_REGULATION_OF_B_CELL_ACTIVATION	27	-0.502526	-1.14139	0.311189	0.614974
GO_PYRIMIDINE_NUCLEOTIDE_BIOSYNTHETIC_PROCESS	24	-0.505758	-1.1412	0.321678	0.615136
GO_POSITIVE_REGULATION_OF_PROTEIN_KINASE_ACTIVITY	414	-0.428673	-1.13998	0.08	0.61861
GO_BLASTOCYST_FORMATION	29	-0.492544	-1.13982	0.319635	0.618706
GO_CELLULAR_IRON_ION_HOMEOSTASIS	49	-0.465794	-1.1387	0.312158	0.62202
GO_REGULATION_OF_BLOOD_CIRCULATION	150	-0.435469	-1.13822	0.213563	0.623246
GO_BRANCHING_INVOLVED_IN_BLOOD_VESSEL_MORPHOGENESIS	22	-0.518772	-1.13794	0.302632	0.623716
GO_NEGATIVE_REGULATION_OF_CARDIOCYTE_DIFFERENTIATION	16	-0.540612	-1.1378	0.330413	0.623675
GO_NEGATIVE_REGULATION_OF_TOLL_LIKE_RECEPTOR_SIGNALING_PATHWAY	32	-0.489907	-1.13734	0.305459	0.624805
GO_NEUROINFLAMMATORY_RESPONSE	54	-0.455367	-1.13723	0.295503	0.624696
GO_GOLGI_TO_PLASMA_MEMBRANE_PROTEIN_TRANSPORT	34	-0.487439	-1.13721	0.305524	0.62428
GO_NEGATIVE_REGULATION_OF_PLASMA_MEMBRANE_BOUNDED_CELL_PROJECTION_ASSEMBLY	20	-0.519592	-1.1369	0.33625	0.624798
GO_ATP_DEPENDENT_CHROMATIN_REMODELING	64	-0.45391	-1.1368	0.291536	0.624663
GO_GLUTAMATE_SECRETION	26	-0.504282	-1.13669	0.327888	0.62455
GO_METAL_ION_TRANSPORT	490	-0.426091	-1.13622	0.08	0.625633
GO_REGULATION_OF_GLUCAN_BIOSYNTHETIC_PROCESS	23	-0.506225	-1.13608	0.317912	0.625612
GO_RESPONSE_TO_CALCIUM_ION	94	-0.446906	-1.13593	0.262729	0.625584
GO_ACTIN_FILAMENT_DEPOLYMERIZATION	45	-0.47383	-1.13579	0.303297	0.625571
GO_ORGANIC_ACID_TRANSMEMBRANE_TRANSPORT	90	-0.448769	-1.13556	0.25903	0.625921
GO_REGULATION_OF_PROTEIN_SERINE_THREONINE_KINASE_ACTIVITY	410	-0.426689	-1.13523	0.103	0.626491
GO_HEART_VALVE_DEVELOPMENT	43	-0.476101	-1.13516	0.284153	0.626198
GO_RESPONSE_TO_RADIATION	323	-0.426743	-1.13439	0.127	0.62821
GO_ENDOTHELIAL_CELL_MIGRATION	162	-0.433964	-1.13405	0.207243	0.628854
GO_NEGATIVE_REGULATION_OF_MYOBLAST_DIFFERENTIATION	15	-0.543996	-1.13391	0.34443	0.628884
GO_REGULATION_OF_RECEPTOR_BINDING	17	-0.536979	-1.13356	0.324873	0.629551
GO_SEXUAL_REPRODUCTION	457	-0.42658	-1.13344	0.09	0.629455
GO_REGULATION_OF_PROTEIN_LOCALIZATION_TO_CELL_PERIPHERY	98	-0.438392	-1.13335	0.251282	0.629268
GO_PURINE_NUCLEOSIDE_MONOPHOSPHATE_METABOLIC_PROCESS	34	-0.478002	-1.13324	0.319222	0.629157
GO_AMINOGLYCAN_METABOLIC_PROCESS	116	-0.438902	-1.13307	0.246436	0.629212
GO_POSITIVE_REGULATION_OF_STRIATED_MUSCLE_CELL_DIFFERENTIATION	34	-0.492374	-1.13209	0.316268	0.632064
GO_RESPONSE_TO_OXYGEN_LEVELS	298	-0.428807	-1.13191	0.132	0.632149
GO_XENOBIOTIC_TRANSPORT	25	-0.507458	-1.13158	0.320843	0.632807
GO_ADENYLATE_CYCLASE_INHIBITING_G_PROTEIN_COUPLED_RECEPTOR_SIGNALING_PATHWAY	34	-0.483542	-1.13146	0.326622	0.632702
GO_LONG_TERM_SYNAPTIC_POTENTIATION	51	-0.461327	-1.13122	0.313789	0.633033
GO_SIGNAL_TRANSDUCTION_IN_RESPONSE_TO_DNA_DAMAGE	113	-0.438291	-1.13113	0.256384	0.632867
GO_SMALL_GTPASE_MEDIATED_SIGNAL_TRANSDUCTION	414	-0.426934	-1.13094	0.1	0.632968
GO_OLIGODENDROCYTE_DEVELOPMENT	30	-0.486009	-1.13094	0.321596	0.632503
GO_CELLULAR_RESPONSE_TO_RADIATION	139	-0.433841	-1.13004	0.230382	0.634955
GO_NEGATIVE_REGULATION_OF_OSTEOBLAST_DIFFERENTIATION	25	-0.499655	-1.13004	0.328994	0.634479
GO_ORGANIC_ACID_BIOSYNTHETIC_PROCESS	234	-0.42642	-1.12941	0.168168	0.636096
GO_NEURAL_NUCLEUS_DEVELOPMENT	39	-0.478549	-1.12924	0.311876	0.63616
GO_TOLL_LIKE_RECEPTOR_9_SIGNALING_PATHWAY	20	-0.519057	-1.12913	0.333333	0.636057
GO_REGULATION_OF_SMOOTH_MUSCLE_CELL_DIFFERENTIATION	22	-0.511789	-1.12903	0.343266	0.63592
GO_POSITIVE_REGULATION_OF_LAMELLIPODIUM_ORGANIZATION	24	-0.507867	-1.12788	0.332151	0.639378
GO_EPITHELIAL_CELL_APOPTOTIC_PROCESS	78	-0.439251	-1.12786	0.289446	0.638956
GO_CELL_FATE_DETERMINATION	17	-0.538877	-1.12776	0.344444	0.638808
GO_SPLEEN_DEVELOPMENT	24	-0.49853	-1.12686	0.333333	0.641383
GO_NEGATIVE_REGULATION_OF_SMALL_GTPASE_MEDIATED_SIGNAL_TRANSDUCTION	50	-0.465834	-1.12666	0.299465	0.641551
GO_OVULATION	16	-0.534719	-1.12646	0.348659	0.64174
GO_ENTRY_INTO_HOST	117	-0.43163	-1.12619	0.249234	0.642095
GO_REGULATION_OF_COLLAGEN_METABOLIC_PROCESS	27	-0.491608	-1.12599	0.329356	0.642327
GO_VASCULAR_ENDOTHELIAL_CELL_PROLIFERATION	17	-0.532827	-1.12561	0.359748	0.643124
GO_NEGATIVE_REGULATION_OF_IMMUNE_SYSTEM_PROCESS	322	-0.426244	-1.12451	0.151	0.646378
GO_PROTEIN_LOCALIZATION_TO_PLASMA_MEMBRANE	215	-0.427499	-1.12438	0.18018	0.646319
GO_POSITIVE_REGULATION_OF_SMOOTH_MUSCLE_CELL_PROLIFERATION	71	-0.442998	-1.12437	0.306818	0.645887
GO_REGULATION_OF_T_CELL_ACTIVATION	253	-0.425164	-1.12425	0.173	0.645842
GO_PROSTANOID_BIOSYNTHETIC_PROCESS	22	-0.511842	-1.12414	0.34279	0.645703
GO_NEGATIVE_REGULATION_OF_INTRINSIC_APOPTOTIC_SIGNALING_PATHWAY_IN_RESPONSE_TO_DNA_DAMAGE	27	-0.504025	-1.12403	0.330243	0.645589
GO_CELL_CHEMOTAXIS	206	-0.422678	-1.12305	0.205617	0.64848
GO_RESPONSE_TO_CAMP	62	-0.44977	-1.12303	0.302251	0.648068
GO_MYOTUBE_CELL_DEVELOPMENT	18	-0.526416	-1.12244	0.35396	0.649605
GO_COLUMNAR_CUBOIDAL_EPITHELIAL_CELL_DEVELOPMENT	41	-0.473562	-1.12216	0.340285	0.650084
GO_GLANDULAR_EPITHELIAL_CELL_DEVELOPMENT	17	-0.532167	-1.12213	0.341554	0.649698
GO_INNER_EAR_AUDITORY_RECEPTOR_CELL_DIFFERENTIATION	23	-0.509178	-1.12195	0.334132	0.649803
GO_MAINTENANCE_OF_CELL_NUMBER	121	-0.430927	-1.12147	0.259674	0.650987
GO_REGULATION_OF_CELLULAR_RESPIRATION	22	-0.50386	-1.12107	0.3523	0.651775
GO_CELL_CYCLE_ARREST	193	-0.427669	-1.12093	0.219	0.651746
GO_SCHWANN_CELL_DEVELOPMENT	21	-0.507602	-1.12063	0.348724	0.652285
GO_INORGANIC_ION_TRANSMEMBRANE_TRANSPORT	441	-0.419791	-1.11987	0.129	0.65434
GO_PHOSPHATIDYLINOSITOL_3_KINASE_SIGNALING	110	-0.436814	-1.11983	0.285568	0.654003
GO_CELLULAR_HORMONE_METABOLIC_PROCESS	63	-0.454	-1.11972	0.301268	0.65389
GO_MUSCLE_SYSTEM_PROCESS	258	-0.423623	-1.1194	0.18018	0.654474
GO_POTASSIUM_ION_IMPORT_ACROSS_PLASMA_MEMBRANE	20	-0.51142	-1.11929	0.344486	0.654372
GO_NUCLEOSIDE_MONOPHOSPHATE_METABOLIC_PROCESS	59	-0.455782	-1.11906	0.30032	0.654709
GO_MULTIVESICULAR_BODY_SORTING_PATHWAY	35	-0.474619	-1.11863	0.317156	0.655652
GO_REGULATION_OF_CYTOSKELETON_ORGANIZATION	426	-0.421108	-1.11825	0.131	0.65645
GO_REGULATION_OF_MEMBRANE_DEPOLARIZATION	29	-0.489429	-1.11756	0.333724	0.658373
GO_DNA_DAMAGE_RESPONSE_SIGNAL_TRANSDUCTION_BY_P53_CLASS_MEDIATOR	93	-0.432947	-1.11713	0.28483	0.659395
GO_REGULATION_OF_EPITHELIAL_CELL_DIFFERENTIATION	96	-0.433213	-1.11685	0.28777	0.659856
GO_MONONUCLEAR_CELL_MIGRATION	60	-0.454968	-1.11663	0.314225	0.660125
GO_MICROTUBULE_BUNDLE_FORMATION	51	-0.455592	-1.11631	0.319058	0.660681
GO_GLIAL_CELL_ACTIVATION	45	-0.460803	-1.11568	0.325708	0.662335
GO_CARDIAC_MUSCLE_CONTRACTION	77	-0.442219	-1.11539	0.295908	0.662778
GO_ANTIMICROBIAL_HUMORAL_IMMUNE_RESPONSE_MEDIATED_BY_ANTIMICROBIAL_PEPTIDE	26	-0.492012	-1.11522	0.339022	0.662882
GO_SENSORY_PERCEPTION_OF_PAIN	44	-0.459263	-1.11488	0.325221	0.663546
GO_HOMOLOGOUS_CHROMOSOME_PAIRING_AT_MEIOSIS	21	-0.509413	-1.11476	0.333742	0.663484
GO_NEUROPEPTIDE_SIGNALING_PATHWAY	22	-0.505427	-1.11435	0.344242	0.664405
GO_REGULATION_OF_VASCULATURE_DEVELOPMENT	231	-0.420986	-1.11089	0.221443	0.6757
GO_TRANSPORT_ALONG_MICROTUBULE	134	-0.425413	-1.11079	0.266667	0.675515
GO_TISSUE_REMODELING	118	-0.431173	-1.1105	0.273279	0.675984
GO_PROTEIN_TRANSPORT_ALONG_MICROTUBULE	56	-0.450837	-1.11039	0.326487	0.675868
GO_POSITIVE_REGULATION_OF_MAPK_CASCADE	374	-0.418416	-1.11013	0.165	0.676202
GO_NEURON_APOPTOTIC_PROCESS	169	-0.423161	-1.1101	0.257286	0.675813
GO_ANION_TRANSPORT	372	-0.41542	-1.10961	0.171	0.676936
GO_INTRINSIC_APOPTOTIC_SIGNALING_PATHWAY_BY_P53_CLASS_MEDIATOR	66	-0.444092	-1.10954	0.312369	0.676669
GO_EXTRINSIC_APOPTOTIC_SIGNALING_PATHWAY	184	-0.41893	-1.10951	0.248746	0.676258
GO_PURINE_NUCLEOSIDE_BIOSYNTHETIC_PROCESS	18	-0.518898	-1.10927	0.350699	0.676615
GO_SECONDARY_METABOLIC_PROCESS	30	-0.478479	-1.10907	0.359431	0.676828
GO_ENTEROENDOCRINE_CELL_DIFFERENTIATION	17	-0.520957	-1.10884	0.370968	0.67713
GO_MITOTIC_CYTOKINETIC_PROCESS	22	-0.50674	-1.10854	0.353644	0.677717
GO_REGULATION_OF_DNA_BINDING	91	-0.428812	-1.10806	0.308325	0.678862
GO_DNA_BIOSYNTHETIC_PROCESS	162	-0.423631	-1.10717	0.263847	0.681379
GO_INTEGRIN_ACTIVATION	19	-0.515275	-1.10713	0.361624	0.681
GO_NEUTROPHIL_MIGRATION	82	-0.435558	-1.10706	0.328838	0.680757
GO_POSITIVE_REGULATION_OF_NEUROTRANSMITTER_TRANSPORT	15	-0.53513	-1.1068	0.356322	0.681176
GO_POSITIVE_REGULATION_OF_OXIDOREDUCTASE_ACTIVITY	38	-0.471123	-1.10667	0.341463	0.681109
GO_NEGATIVE_REGULATION_OF_JNK_CASCADE	28	-0.486904	-1.10516	0.361827	0.68574
GO_REGULATION_OF_CELL_MATURATION	16	-0.532868	-1.10495	0.380653	0.686006
GO_POSITIVE_REGULATION_OF_BMP_SIGNALING_PATHWAY	20	-0.512075	-1.10425	0.381011	0.68789
GO_RESPONSE_TO_ACTIVITY	49	-0.453546	-1.10403	0.324265	0.688148
GO_POSITIVE_REGULATION_OF_CYCLIN_DEPENDENT_PROTEIN_KINASE_ACTIVITY	30	-0.476968	-1.10402	0.368056	0.68769
GO_STEROID_BIOSYNTHETIC_PROCESS	124	-0.424289	-1.10397	0.28499	0.687355
GO_NEGATIVE_REGULATION_OF_GROWTH	176	-0.417227	-1.10373	0.258032	0.687692
GO_PROTEIN_N_LINKED_GLYCOSYLATION	68	-0.442665	-1.10359	0.324524	0.687639
GO_POSITIVE_REGULATION_OF_NIK_NF_KAPPAB_SIGNALING	71	-0.438259	-1.10328	0.331256	0.688204
GO_PROTEIN_K11_LINKED_UBIQUITINATION	27	-0.485682	-1.10304	0.362676	0.688482
GO_B_CELL_MEDIATED_IMMUNITY	81	-0.434664	-1.1027	0.301042	0.689193
GO_BEHAVIOR	331	-0.413363	-1.10238	0.186	0.689776
GO_PEPTIDYL_PROLINE_MODIFICATION	43	-0.456431	-1.10222	0.345277	0.689851
GO_TYPE_B_PANCREATIC_CELL_PROLIFERATION	15	-0.530841	-1.10192	0.372032	0.690383
GO_POSITIVE_REGULATION_OF_POSTTRANSCRIPTIONAL_GENE_SILENCING	22	-0.510779	-1.10176	0.366544	0.69046
GO_CHROMATIN_ASSEMBLY_OR_DISASSEMBLY	124	-0.423716	-1.10172	0.30581	0.690115
GO_VIRAL_GENOME_REPLICATION	108	-0.425729	-1.10157	0.282234	0.690111
GO_HEAD_MORPHOGENESIS	24	-0.494099	-1.10045	0.364621	0.693427
GO_NEGATIVE_REGULATION_OF_VASCULATURE_DEVELOPMENT	83	-0.430664	-1.10009	0.323347	0.69414
GO_REGULATION_OF_GLYCOGEN_METABOLIC_PROCESS	27	-0.478907	-1.09992	0.368421	0.69419
GO_POSITIVE_REGULATION_OF_BONE_RESORPTION	15	-0.528469	-1.09962	0.38625	0.694763
GO_PROTEIN_KINASE_A_SIGNALING	27	-0.485582	-1.09925	0.379511	0.695503
GO_REGULATION_OF_MICROTUBULE_CYTOSKELETON_ORGANIZATION	158	-0.420313	-1.09845	0.272177	0.697682
GO_POSITIVE_REGULATION_OF_LEUKOCYTE_PROLIFERATION	112	-0.421921	-1.09828	0.299797	0.697741
GO_REGULATION_OF_HORMONE_BIOSYNTHETIC_PROCESS	16	-0.52244	-1.0979	0.386139	0.698543
GO_SIGNAL_RELEASE	378	-0.414167	-1.09764	0.174	0.698922
GO_REGULATION_OF_LEUKOCYTE_PROLIFERATION	178	-0.41457	-1.09757	0.284569	0.698661
GO_NEUROEPITHELIAL_CELL_DIFFERENTIATION	32	-0.473589	-1.09749	0.369591	0.698419
GO_STRESS_GRANULE_ASSEMBLY	20	-0.514517	-1.09737	0.375912	0.698344
GO_RESPONSE_TO_ELECTRICAL_STIMULUS	22	-0.510308	-1.0973	0.35876	0.698082
GO_REGULATION_OF_RESPONSE_TO_DNA_DAMAGE_STIMULUS	183	-0.418952	-1.09717	0.261261	0.698027
GO_POSITIVE_REGULATION_OF_POTASSIUM_ION_TRANSPORT	24	-0.486529	-1.09609	0.377358	0.701245
GO_POSITIVE_REGULATION_OF_PHOSPHATIDYLINOSITOL_3_KINASE_SIGNALING	69	-0.433841	-1.09527	0.341053	0.703546
GO_CIRCADIAN_RHYTHM	154	-0.423507	-1.09424	0.292462	0.706671
GO_VESICLE_BUDDING_FROM_MEMBRANE	100	-0.429592	-1.09405	0.317901	0.706846
GO_REGULATION_OF_ENDOTHELIAL_CELL_MIGRATION	122	-0.425865	-1.09382	0.312057	0.70712
GO_REGULATION_OF_TRANS_SYNAPTIC_SIGNALING	259	-0.414758	-1.09349	0.229229	0.707736
GO_POSITIVE_REGULATION_OF_PROTEIN_LOCALIZATION_TO_MEMBRANE	94	-0.425929	-1.0933	0.327869	0.707895
GO_CELLULAR_CARBOHYDRATE_BIOSYNTHETIC_PROCESS	60	-0.440812	-1.09326	0.358431	0.707527
GO_CALCIUM_ION_REGULATED_EXOCYTOSIS	35	-0.474235	-1.09319	0.348416	0.707257
GO_SMOOTH_MUSCLE_CELL_APOPTOTIC_PROCESS	17	-0.519236	-1.09313	0.377382	0.706975
GO_REGULATION_OF_MACROPHAGE_ACTIVATION	43	-0.454672	-1.09251	0.362822	0.708636
GO_DIVALENT_INORGANIC_CATION_HOMEOSTASIS	290	-0.412398	-1.0923	0.237	0.708844
GO_PROTEIN_MATURATION	196	-0.415572	-1.09193	0.275551	0.709597
GO_REGULATION_OF_PRESYNAPSE_ORGANIZATION	15	-0.531383	-1.09183	0.380832	0.709436
GO_REGULATION_OF_LYMPHOCYTE_MIGRATION	46	-0.457705	-1.09122	0.360836	0.71101
GO_AXONEME_ASSEMBLY	25	-0.491481	-1.09118	0.406963	0.710619
GO_PROTEIN_DNA_COMPLEX_SUBUNIT_ORGANIZATION	178	-0.414012	-1.09114	0.275551	0.710298
GO_NEGATIVE_REGULATION_OF_CYCLIN_DEPENDENT_PROTEIN_KINASE_ACTIVITY	26	-0.479575	-1.09098	0.380896	0.71036
GO_ESTABLISHMENT_OF_PROTEIN_LOCALIZATION_TO_PLASMA_MEMBRANE	47	-0.454355	-1.09082	0.378705	0.710441
GO_MULTICELLULAR_ORGANISM_GROWTH	107	-0.425791	-1.09073	0.324131	0.71026
GO_REGULATION_OF_VIRAL_INDUCED_CYTOPLASMIC_PATTERN_RECOGNITION_RECEPTOR_SIGNALING_PATHWAY	16	-0.517855	-1.09041	0.378033	0.710857
GO_NEGATIVE_REGULATION_OF_VIRAL_LIFE_CYCLE	67	-0.428665	-1.09039	0.359029	0.710433
GO_POSITIVE_REGULATION_OF_MAP_KINASE_ACTIVITY	199	-0.416466	-1.09028	0.298298	0.710269
GO_DEFENSE_RESPONSE_TO_FUNGUS	16	-0.525466	-1.08971	0.393789	0.711754
GO_POSITIVE_REGULATION_OF_LEUKOCYTE_CHEMOTAXIS	67	-0.432808	-1.08941	0.366771	0.712235
GO_LONG_CHAIN_FATTY_ACYL_COA_METABOLIC_PROCESS	16	-0.517105	-1.08895	0.378653	0.713304
GO_REGULATION_OF_HEART_RATE_BY_CARDIAC_CONDUCTION	23	-0.495491	-1.08855	0.397849	0.714218
GO_LENS_DEVELOPMENT_IN_CAMERA_TYPE_EYE	47	-0.449796	-1.08851	0.369099	0.713831
GO_NEGATIVE_REGULATION_OF_MYELOID_LEUKOCYTE_DIFFERENTIATION	37	-0.463488	-1.08836	0.376812	0.713853
GO_REGULATION_OF_PROTEIN_LOCALIZATION_TO_MEMBRANE	146	-0.414949	-1.08827	0.315206	0.713652
GO_DENDRITE_EXTENSION	17	-0.509015	-1.08747	0.389381	0.715995
GO_INTESTINAL_ABSORPTION	20	-0.499735	-1.08746	0.383578	0.715497
GO_POSITIVE_REGULATION_OF_MUSCLE_CELL_DIFFERENTIATION	59	-0.436602	-1.08734	0.36859	0.715404
GO_PERK_MEDIATED_UNFOLDED_PROTEIN_RESPONSE	18	-0.512095	-1.08717	0.39875	0.71549
GO_DNA_DAMAGE_RESPONSE_DETECTION_OF_DNA_DAMAGE	36	-0.46084	-1.08685	0.38796	0.716079
GO_NEGATIVE_REGULATION_OF_CYTOKINE_PRODUCTION_INVOLVED_IN_IMMUNE_RESPONSE	16	-0.51056	-1.08634	0.38946	0.71731
GO_REGULATION_OF_SMALL_GTPASE_MEDIATED_SIGNAL_TRANSDUCTION	261	-0.412787	-1.0859	0.271543	0.718292
GO_NUCLEOSOME_ORGANIZATION	88	-0.428483	-1.0858	0.347466	0.718162
GO_GLYCOSYLATION	187	-0.411929	-1.08574	0.301301	0.717873
GO_POSITIVE_REGULATION_OF_PROTEIN_SERINE_THREONINE_KINASE_ACTIVITY	268	-0.411085	-1.08553	0.248746	0.71805
GO_NEURON_DEATH	258	-0.408659	-1.08478	0.251251	0.720115
GO_NEURON_CELLULAR_HOMEOSTASIS	17	-0.514733	-1.08454	0.392768	0.720432
GO_MEMBRANE_DEPOLARIZATION_DURING_ACTION_POTENTIAL	15	-0.518539	-1.08411	0.407547	0.721349
GO_REGULATION_OF_SYNAPTIC_VESICLE_EXOCYTOSIS	46	-0.449784	-1.0834	0.379761	0.723362
GO_PHOTORECEPTOR_CELL_DIFFERENTIATION	29	-0.465739	-1.08335	0.360911	0.723036
[truncated: 1,480 more rows]
