# Supplementary material for: Chemotherapy Induces Tumor-Associated Macrophages that Aid Adaptive Immune Responses in Ovarian Cancer
Source: Oxford University Press journal article supplement (doi:10.1158/2326-6066.cir-20-0968), 2021-04-10
Supplement: 23266066cir200968-sup-255789_2_supp_6942292_qp0z35.xlsx [file 23266066cir200968-sup-255789_2_supp_6942292_qp0z35.xlsx]

## Sheet: STable4
Supplementary Table 4. GSEA was performed on Gene Pattern using gene ontology biological processes and ranked t-statistic of all genes in AZD vs Ctrl. List of significantly enriched processes (FDR < 0.05) in AZD vs Ctrl NES > 0 means up in AZD, NES < 0 means down in AZD.
NAME	SIZE	ES	NES	NOM p-val	FDR q-val
GO_B_CELL_RECEPTOR_SIGNALING_PATHWAY	46	-0.804994	-2.6848	0	0
GO_ADAPTIVE_IMMUNE_RESPONSE	247	-0.63021	-2.64714	0	0
GO_MAST_CELL_ACTIVATION	44	-0.792427	-2.61594	0	0
GO_REGULATION_OF_B_CELL_PROLIFERATION	49	-0.761896	-2.58748	0	0
GO_B_CELL_PROLIFERATION	57	-0.744712	-2.54574	0	0
GO_MAST_CELL_MEDIATED_IMMUNITY	36	-0.783789	-2.49156	0	0
GO_B_CELL_ACTIVATION	175	-0.607526	-2.47735	0	0
GO_POSITIVE_REGULATION_OF_CELL_ACTIVATION	233	-0.583202	-2.42771	0	0
GO_REGULATION_OF_B_CELL_ACTIVATION	97	-0.646327	-2.42234	0	0
GO_ALPHA_BETA_T_CELL_ACTIVATION	99	-0.638597	-2.40372	0	0
GO_LYMPHOCYTE_DIFFERENTIATION	257	-0.567111	-2.40273	0	0
GO_LEUKOCYTE_PROLIFERATION	189	-0.591072	-2.39642	0	0
GO_POSITIVE_REGULATION_OF_LEUKOCYTE_PROLIFERATION	85	-0.645941	-2.39482	0	0
GO_POSITIVE_REGULATION_OF_ALPHA_BETA_T_CELL_ACTIVATION	43	-0.708957	-2.38438	0	0
GO_REGULATION_OF_LEUKOCYTE_DEGRANULATION	31	-0.766903	-2.38341	0	0
GO_POSITIVE_REGULATION_OF_LEUKOCYTE_CELL_CELL_ADHESION	157	-0.593681	-2.37707	0	0
GO_LYMPHOCYTE_ACTIVATION	475	-0.546732	-2.36765	0	0
GO_REGULATION_OF_CELL_ACTIVATION	392	-0.549205	-2.36581	0	0
GO_POSITIVE_REGULATION_OF_LYMPHOCYTE_DIFFERENTIATION	70	-0.661887	-2.3616	0	0
GO_ADAPTIVE_IMMUNE_RESPONSE_BASED_ON_SOMATIC_RECOMBINATION_OF_IMMUNE_RECEPTORS_BUILT_FROM_IMMUNOGLOBULIN_SUPERFAMILY_DOMAINS	171	-0.58479	-2.35994	0	0
GO_REGULATION_OF_LEUKOCYTE_PROLIFERATION	147	-0.595878	-2.35765	0	0
GO_POSITIVE_REGULATION_OF_LYMPHOCYTE_ACTIVATION	195	-0.575261	-2.35053	0	0
GO_REGULATION_OF_MAST_CELL_ACTIVATION	30	-0.768727	-2.34668	0	0
GO_POSITIVE_REGULATION_OF_INTERFERON_GAMMA_PRODUCTION	42	-0.715012	-2.34603	0	0
GO_LYSOSOME_LOCALIZATION	54	-0.685834	-2.34192	0	0
GO_LEUKOCYTE_DIFFERENTIATION	378	-0.542517	-2.33987	0	0
GO_REGULATION_OF_LEUKOCYTE_DIFFERENTIATION	202	-0.563946	-2.33624	0	0
GO_REGULATION_OF_ALPHA_BETA_T_CELL_ACTIVATION	66	-0.659695	-2.32725	0	0
GO_REGULATION_OF_LYMPHOCYTE_DIFFERENTIATION	126	-0.592801	-2.32436	0	0
GO_REGULATION_OF_MYELOID_LEUKOCYTE_MEDIATED_IMMUNITY	37	-0.727083	-2.32259	0	0
GO_LYMPHOCYTE_MEDIATED_IMMUNITY	147	-0.580658	-2.31665	0	0
GO_POSITIVE_REGULATION_OF_T_CELL_PROLIFERATION	58	-0.657034	-2.31624	0	0
GO_REGULATION_OF_B_CELL_DIFFERENTIATION	26	-0.776733	-2.31582	0	0
GO_INTERLEUKIN_6_PRODUCTION	107	-0.60679	-2.31466	0	0
GO_PLATELET_ACTIVATION	118	-0.604611	-2.31358	0	0
GO_POSITIVE_REGULATION_OF_TUMOR_NECROSIS_FACTOR_SUPERFAMILY_CYTOKINE_PRODUCTION	64	-0.656293	-2.30992	0	0
GO_RESPIRATORY_BURST	27	-0.765435	-2.30764	0	0
GO_LEUKOCYTE_HOMEOSTASIS	68	-0.635902	-2.2998	0	0
GO_INTERLEUKIN_10_PRODUCTION	35	-0.724713	-2.29129	0	0
GO_NEGATIVE_REGULATION_OF_CELL_ACTIVATION	142	-0.578378	-2.2857	0	0
GO_REGULATION_OF_B_CELL_RECEPTOR_SIGNALING_PATHWAY	20	-0.824353	-2.28509	0	0
GO_T_CELL_ACTIVATION	328	-0.533972	-2.28438	0	0
GO_TUMOR_NECROSIS_FACTOR_SUPERFAMILY_CYTOKINE_PRODUCTION	107	-0.602613	-2.28267	0	0
GO_PHAGOCYTOSIS	210	-0.554973	-2.28057	0	0
GO_INTERLEUKIN_4_PRODUCTION	26	-0.780591	-2.27727	0	0
GO_REGULATION_OF_LEUKOCYTE_MEDIATED_IMMUNITY	124	-0.584567	-2.27431	0	0
GO_T_CELL_ACTIVATION_INVOLVED_IN_IMMUNE_RESPONSE	63	-0.641615	-2.27399	0	0
GO_B_CELL_DIFFERENTIATION	91	-0.617363	-2.27164	0	0
GO_LEUKOCYTE_CELL_CELL_ADHESION	244	-0.543157	-2.27023	0	0
GO_REGULATION_OF_LYMPHOCYTE_ACTIVATION	305	-0.532794	-2.27002	0	0
GO_POSITIVE_REGULATION_OF_LEUKOCYTE_DIFFERENTIATION	111	-0.588801	-2.26133	0	0
GO_REGULATION_OF_ALPHA_BETA_T_CELL_DIFFERENTIATION	47	-0.66664	-2.26085	0	0
GO_POSITIVE_REGULATION_OF_CELL_CELL_ADHESION	184	-0.552468	-2.25612	0	0
GO_LEUKOCYTE_ACTIVATION_INVOLVED_IN_INFLAMMATORY_RESPONSE	26	-0.756801	-2.25121	0	1.54e-05
GO_REGULATION_OF_PHAGOCYTOSIS	71	-0.617737	-2.23811	0	1.51e-05
GO_MYELOID_LEUKOCYTE_MIGRATION	137	-0.569137	-2.23513	0	1.49e-05
GO_POSITIVE_REGULATION_OF_B_CELL_PROLIFERATION	30	-0.729124	-2.23396	0	1.46e-05
GO_REGULATION_OF_INTERLEUKIN_4_PRODUCTION	21	-0.796893	-2.22873	0	1.43e-05
GO_POSITIVE_REGULATION_OF_ALPHA_BETA_T_CELL_DIFFERENTIATION	35	-0.70373	-2.22748	0	1.41e-05
GO_POSITIVE_REGULATION_OF_B_CELL_ACTIVATION	58	-0.637948	-2.22659	0	1.39e-05
GO_REGULATION_OF_T_CELL_DIFFERENTIATION	100	-0.58193	-2.22261	0	1.36e-05
GO_GLIAL_CELL_ACTIVATION	33	-0.715205	-2.21262	0	1.34e-05
GO_ALPHA_BETA_T_CELL_DIFFERENTIATION	78	-0.60521	-2.21226	0	1.32e-05
GO_NEGATIVE_REGULATION_OF_INTERLEUKIN_6_PRODUCTION	33	-0.722163	-2.20955	0	3.93e-05
GO_INFLAMMATORY_RESPONSE	472	-0.505893	-2.20825	0	3.87e-05
GO_REGULATION_OF_IMMUNE_EFFECTOR_PROCESS	264	-0.517273	-2.20717	0	3.82e-05
GO_T_CELL_DIFFERENTIATION	180	-0.541695	-2.20656	0	3.76e-05
GO_REGULATION_OF_ADAPTIVE_IMMUNE_RESPONSE	111	-0.573761	-2.20258	0	3.7e-05
GO_LEUKOCYTE_MEDIATED_CYTOTOXICITY	51	-0.641128	-2.19414	0	4.89e-05
GO_REGULATION_OF_T_CELL_ACTIVATION	223	-0.526535	-2.1935	0	4.82e-05
GO_NEGATIVE_REGULATION_OF_CYTOKINE_PRODUCTION	195	-0.530768	-2.18994	0	4.75e-05
GO_LEUKOCYTE_CHEMOTAXIS	142	-0.552798	-2.18911	0	4.69e-05
GO_T_CELL_PROLIFERATION	122	-0.555484	-2.18239	0	4.62e-05
GO_NEGATIVE_REGULATION_OF_LEUKOCYTE_MEDIATED_IMMUNITY	31	-0.712631	-2.18066	0	5.69e-05
GO_REGULATION_OF_CD4_POSITIVE_ALPHA_BETA_T_CELL_DIFFERENTIATION	35	-0.68685	-2.17984	0	5.61e-05
GO_REGULATION_OF_MAST_CELL_ACTIVATION_INVOLVED_IN_IMMUNE_RESPONSE	22	-0.770478	-2.1796	0	5.54e-05
GO_INTERLEUKIN_2_PRODUCTION	53	-0.646656	-2.17623	0	5.47e-05
GO_POSITIVE_REGULATION_OF_INTERLEUKIN_10_PRODUCTION	23	-0.758529	-2.17413	0	5.4e-05
GO_NEGATIVE_REGULATION_OF_ADAPTIVE_IMMUNE_RESPONSE	31	-0.700342	-2.16987	0	6.4e-05
GO_PHOSPHOLIPASE_C_ACTIVATING_G_PROTEIN_COUPLED_RECEPTOR_SIGNALING_PATHWAY	41	-0.671401	-2.16849	0	6.32e-05
GO_NEUROINFLAMMATORY_RESPONSE	41	-0.662682	-2.16771	0	6.24e-05
GO_CD4_POSITIVE_ALPHA_BETA_T_CELL_ACTIVATION	65	-0.611228	-2.16755	0	6.16e-05
GO_REGULATION_OF_CELL_KILLING	40	-0.666655	-2.16605	0	6.09e-05
GO_REGULATION_OF_ANTIGEN_RECEPTOR_MEDIATED_SIGNALING_PATHWAY	44	-0.659438	-2.16438	0	6.01e-05
GO_MATURE_B_CELL_DIFFERENTIATION	22	-0.758609	-2.15882	0	5.94e-05
GO_POSITIVE_REGULATION_OF_PHAGOCYTOSIS	51	-0.629838	-2.14759	0	9.78e-05
GO_REGULATION_OF_CELL_CELL_ADHESION	287	-0.506315	-2.14235	0	0.000106
GO_PRODUCTION_OF_MOLECULAR_MEDIATOR_INVOLVED_IN_INFLAMMATORY_RESPONSE	46	-0.651862	-2.13717	0	0.000134
GO_HUMORAL_IMMUNE_RESPONSE	108	-0.560779	-2.13663	0	0.000132
GO_NEGATIVE_REGULATION_OF_B_CELL_ACTIVATION	29	-0.718189	-2.13286	0	0.000159
GO_NEGATIVE_REGULATION_OF_B_CELL_PROLIFERATION	15	-0.813933	-2.1246	0	0.000212
GO_T_CELL_MEDIATED_IMMUNITY	62	-0.610828	-2.12351	0	0.00021
GO_NEGATIVE_REGULATION_OF_LYMPHOCYTE_ACTIVATION	106	-0.554682	-2.12246	0	0.000226
GO_PURINERGIC_RECEPTOR_SIGNALING_PATHWAY	21	-0.749863	-2.11938	0	0.000241
GO_POSITIVE_REGULATION_OF_IMMUNE_EFFECTOR_PROCESS	140	-0.532594	-2.11513	0	0.000256
GO_POSITIVE_REGULATION_OF_CYTOKINE_BIOSYNTHETIC_PROCESS	49	-0.625519	-2.11149	0	0.000262
GO_NEGATIVE_REGULATION_OF_LYMPHOCYTE_MEDIATED_IMMUNITY	22	-0.729899	-2.10569	0	0.000285
GO_POSITIVE_REGULATION_OF_HEMOPOIESIS	143	-0.53042	-2.10349	0	0.0003
GO_REGULATION_OF_MACROPHAGE_MIGRATION	27	-0.704195	-2.09955	0	0.000314
GO_MYD88_DEPENDENT_TOLL_LIKE_RECEPTOR_SIGNALING_PATHWAY	34	-0.667343	-2.0991	0	0.000319
GO_REGULATION_OF_CYTOSOLIC_CALCIUM_ION_CONCENTRATION	200	-0.50546	-2.09897	0	0.000316
GO_NEGATIVE_REGULATION_OF_IMMUNE_RESPONSE	96	-0.558092	-2.09544	0	0.000346
GO_INTERLEUKIN_17_PRODUCTION	19	-0.758449	-2.0935	0	0.000351
GO_POSITIVE_REGULATION_OF_INTERLEUKIN_2_PRODUCTION	28	-0.706202	-2.09156	0	0.000347
GO_I_KAPPAB_PHOSPHORYLATION	18	-0.765451	-2.08751	0	0.000368
GO_POSITIVE_REGULATION_OF_INTERLEUKIN_4_PRODUCTION	17	-0.778509	-2.08638	0	0.000372
GO_POSITIVE_REGULATION_OF_LIPID_TRANSPORT	35	-0.651136	-2.08475	0	0.000385
GO_MYELOID_LEUKOCYTE_DIFFERENTIATION	155	-0.523929	-2.08469	0	0.000381
GO_LYMPHOCYTE_HOMEOSTASIS	49	-0.613474	-2.08399	0	0.000378
GO_MACROPHAGE_ACTIVATION	63	-0.588564	-2.08335	0	0.000382
GO_REGULATION_OF_PLATELET_ACTIVATION	24	-0.731163	-2.08299	0	0.000379
GO_POSITIVE_REGULATION_OF_CD4_POSITIVE_ALPHA_BETA_T_CELL_ACTIVATION	23	-0.715479	-2.08242	0	0.000383
GO_MEMBRANE_INVAGINATION	59	-0.608728	-2.07664	0	0.000409
GO_IMMUNE_RESPONSE_REGULATING_SIGNALING_PATHWAY	414	-0.478297	-2.07608	0	0.000406
GO_CELL_KILLING	62	-0.594847	-2.07576	0	0.000402
GO_POSITIVE_REGULATION_OF_INTERLEUKIN_6_PRODUCTION	65	-0.583115	-2.07013	0	0.000457
GO_G_PROTEIN_COUPLED_PURINERGIC_RECEPTOR_SIGNALING_PATHWAY	15	-0.788399	-2.06454	0.00165837	0.00054
GO_NATURAL_KILLER_CELL_ACTIVATION	41	-0.632816	-2.06353	0	0.000549
GO_LYMPHOCYTE_ACTIVATION_INVOLVED_IN_IMMUNE_RESPONSE	118	-0.537945	-2.06303	0	0.000552
GO_CELLULAR_DEFENSE_RESPONSE	29	-0.680016	-2.06236	0	0.000561
GO_DENDRITIC_CELL_MIGRATION	21	-0.732742	-2.0597	0	0.00057
GO_OSTEOCLAST_DIFFERENTIATION	69	-0.583509	-2.05917	0	0.000572
GO_REGULATION_OF_HUMORAL_IMMUNE_RESPONSE	37	-0.646823	-2.0579	0	0.000574
GO_GRANULOCYTE_MIGRATION	86	-0.555988	-2.0563	0	0.000597
GO_ACTIVATION_OF_IMMUNE_RESPONSE	433	-0.470485	-2.05495	0	0.000626
GO_B_CELL_HOMEOSTASIS	27	-0.69225	-2.05459	0	0.000621
GO_CELL_CHEMOTAXIS	197	-0.50695	-2.05196	0	0.000643
GO_NEGATIVE_REGULATION_OF_LEUKOCYTE_PROLIFERATION	57	-0.583133	-2.04779	0	0.00069
GO_REGULATION_OF_CD4_POSITIVE_ALPHA_BETA_T_CELL_ACTIVATION	41	-0.643132	-2.04726	0	0.000685
GO_BONE_RESORPTION	45	-0.621382	-2.04665	0	0.000693
GO_REGULATION_OF_LYMPHOCYTE_MEDIATED_IMMUNITY	89	-0.550489	-2.04643	0	0.000687
GO_NEGATIVE_REGULATION_OF_IMMUNE_SYSTEM_PROCESS	325	-0.475563	-2.03845	0	0.000791
GO_B_CELL_MEDIATED_IMMUNITY	73	-0.560708	-2.03501	0	0.000829
GO_MYELOID_LEUKOCYTE_ACTIVATION	484	-0.461527	-2.03286	0	0.000874
GO_IMMUNE_RESPONSE_REGULATING_CELL_SURFACE_RECEPTOR_SIGNALING_PATHWAY	280	-0.482456	-2.03218	0	0.00088
GO_DEFENSE_RESPONSE_TO_BACTERIUM	109	-0.530998	-2.0314	0	0.000873
GO_LEUKOCYTE_MIGRATION	302	-0.47797	-2.03139	0	0.000867
GO_REGULATION_OF_TOLL_LIKE_RECEPTOR_SIGNALING_PATHWAY	55	-0.593951	-2.02736	0	0.000916
GO_DENDRITIC_CELL_DIFFERENTIATION	30	-0.673692	-2.02138	0	0.000975
GO_RESPONSE_TO_PROTOZOAN	16	-0.767628	-2.01722	0.00165837	0.00108887
GO_INTERLEUKIN_8_PRODUCTION	53	-0.596017	-2.01447	0	0.001117
GO_INTERLEUKIN_1_BETA_PRODUCTION	52	-0.585957	-2.00815	0	0.00120992
GO_REGULATION_OF_SMALL_GTPASE_MEDIATED_SIGNAL_TRANSDUCTION	284	-0.470015	-2.00776	0	0.00120731
GO_G_PROTEIN_COUPLED_RECEPTOR_SIGNALING_PATHWAY	463	-0.458454	-2.00368	0	0.00128093
GO_NEGATIVE_REGULATION_OF_LEUKOCYTE_APOPTOTIC_PROCESS	36	-0.620485	-2.00261	0	0.00129537
GO_TOLL_LIKE_RECEPTOR_SIGNALING_PATHWAY	117	-0.514497	-1.99929	0	0.00136732
GO_NEGATIVE_REGULATION_OF_ANTIGEN_RECEPTOR_MEDIATED_SIGNALING_PATHWAY	20	-0.719124	-1.99243	0	0.0015242
GO_INTERLEUKIN_2_BIOSYNTHETIC_PROCESS	18	-0.735572	-1.98338	0.00164745	0.00179297
GO_CYTOKINE_METABOLIC_PROCESS	85	-0.547063	-1.9819	0	0.00182052
GO_MACROPHAGE_MIGRATION	37	-0.614382	-1.97855	0	0.00191543
GO_INTERFERON_GAMMA_PRODUCTION	74	-0.552694	-1.97191	0	0.00214243
GO_CYTOKINE_SECRETION	147	-0.496435	-1.96984	0	0.00220569
GO_NEUTROPHIL_MIGRATION	70	-0.552853	-1.96927	0	0.00220796
GO_POSITIVE_REGULATION_OF_MYELOID_LEUKOCYTE_MEDIATED_IMMUNITY	21	-0.699993	-1.96729	0	0.00223719
GO_TUMOR_NECROSIS_FACTOR_BIOSYNTHETIC_PROCESS	18	-0.731644	-1.96545	0	0.00228783
GO_POSITIVE_REGULATION_OF_INFLAMMATORY_RESPONSE	90	-0.533009	-1.96229	0	0.00239184
GO_MONONUCLEAR_CELL_MIGRATION	55	-0.572299	-1.95852	0	0.0024892
GO_POSITIVE_REGULATION_OF_RESPONSE_TO_EXTERNAL_STIMULUS	207	-0.468073	-1.95781	0	0.00250004
GO_POSITIVE_REGULATION_OF_ANION_TRANSPORT	33	-0.629136	-1.95611	0.0015528	0.00254787
GO_SUPEROXIDE_ANION_GENERATION	22	-0.680644	-1.95435	0	0.00260584
GO_ANTIGEN_RECEPTOR_MEDIATED_SIGNALING_PATHWAY	178	-0.487095	-1.95388	0	0.00261574
GO_REGULATION_OF_RHO_PROTEIN_SIGNAL_TRANSDUCTION	109	-0.504194	-1.95323	0	0.00262571
GO_ACTIVATION_OF_PHOSPHOLIPASE_C_ACTIVITY	21	-0.681157	-1.95174	0	0.00269228
GO_REGULATION_OF_BONE_REMODELING	33	-0.629643	-1.95063	0	0.00269643
GO_REGULATION_OF_INFLAMMATORY_RESPONSE	232	-0.467382	-1.9463	0	0.00281777
GO_RESPONSE_TO_CHEMOKINE	52	-0.56916	-1.94422	0	0.00288177
GO_REGULATION_OF_RAS_PROTEIN_SIGNAL_TRANSDUCTION	192	-0.476108	-1.94169	0	0.00297059
GO_INTERLEUKIN_1_PRODUCTION	62	-0.553983	-1.94083	0	0.00299797
GO_REGULATION_OF_GTPASE_ACTIVITY	387	-0.448673	-1.93739	0	0.00315475
GO_ALPHA_BETA_T_CELL_PROLIFERATION	25	-0.657128	-1.93623	0	0.00321523
GO_REGULATION_OF_NATURAL_KILLER_CELL_MEDIATED_IMMUNITY	20	-0.691883	-1.93535	0	0.00324065
GO_REGULATION_OF_MICROGLIAL_CELL_ACTIVATION	15	-0.734461	-1.93329	0	0.00330482
GO_PATTERN_RECOGNITION_RECEPTOR_SIGNALING_PATHWAY	156	-0.478445	-1.93277	0	0.00330028
GO_INTERLEUKIN_6_BIOSYNTHETIC_PROCESS	17	-0.710025	-1.93238	0	0.00331019
GO_REGULATION_OF_MONONUCLEAR_CELL_MIGRATION	37	-0.592426	-1.93011	0	0.00338279
GO_REGULATION_OF_CELL_ADHESION_MEDIATED_BY_INTEGRIN	40	-0.596347	-1.9299	0	0.0033683
GO_POSITIVE_REGULATION_OF_ADAPTIVE_IMMUNE_RESPONSE	67	-0.541795	-1.92749	0.00137363	0.00346811
GO_COAGULATION	245	-0.458686	-1.92734	0	0.00345332
GO_HUMORAL_IMMUNE_RESPONSE_MEDIATED_BY_CIRCULATING_IMMUNOGLOBULIN	29	-0.642316	-1.92594	0	0.00349511
GO_POSITIVE_REGULATION_OF_STEROL_TRANSPORT	16	-0.732265	-1.92525	0.00161551	0.00351757
GO_NEGATIVE_REGULATION_OF_TOLL_LIKE_RECEPTOR_SIGNALING_PATHWAY	31	-0.620803	-1.92431	0	0.00355379
GO_T_CELL_DIFFERENTIATION_INVOLVED_IN_IMMUNE_RESPONSE	51	-0.56872	-1.92402	0	0.00354349
GO_POSITIVE_REGULATION_OF_LEUKOCYTE_MEDIATED_IMMUNITY	77	-0.525226	-1.92235	0	0.00360209
GO_CALCIUM_ION_TRANSMEMBRANE_IMPORT_INTO_CYTOSOL	87	-0.52184	-1.92233	0	0.00358251
GO_CELLULAR_RESPONSE_TO_BIOTIC_STIMULUS	172	-0.474222	-1.92058	0	0.00362257
GO_REGULATION_OF_LEUKOCYTE_APOPTOTIC_PROCESS	66	-0.540046	-1.91876	0	0.00372984
GO_REGULATION_OF_MYELOID_LEUKOCYTE_DIFFERENTIATION	85	-0.521338	-1.91802	0	0.00375509
GO_POSITIVE_REGULATION_OF_GLIOGENESIS	50	-0.571646	-1.91453	0	0.00395952
GO_INTERLEUKIN_1_BETA_SECRETION	29	-0.623654	-1.91298	0	0.00403659
GO_DETECTION_OF_BIOTIC_STIMULUS	17	-0.724959	-1.91211	0	0.0040637
GO_POSITIVE_REGULATION_OF_GTPASE_ACTIVITY	325	-0.447157	-1.91074	0	0.00411301
GO_FC_RECEPTOR_MEDIATED_STIMULATORY_SIGNALING_PATHWAY	77	-0.52825	-1.90955	0	0.00416615
GO_REGULATION_OF_PHOSPHOLIPASE_C_ACTIVITY	33	-0.617118	-1.90864	0	0.00421873
GO_IMMUNOGLOBULIN_PRODUCTION	70	-0.535285	-1.90848	0	0.00421879
GO_POSITIVE_REGULATION_OF_CYTOKINE_PRODUCTION	320	-0.445208	-1.9025	0	0.00457312
GO_MYELOID_DENDRITIC_CELL_ACTIVATION	20	-0.681303	-1.89711	0.00167785	0.00495767
GO_INTERLEUKIN_12_PRODUCTION	41	-0.581885	-1.89602	0	0.00502229
GO_POSITIVE_REGULATION_OF_CELL_ADHESION	305	-0.446025	-1.89407	0	0.0051327
GO_PRODUCTION_OF_MOLECULAR_MEDIATOR_OF_IMMUNE_RESPONSE	136	-0.484605	-1.89295	0	0.00516624
GO_TOLL_LIKE_RECEPTOR_9_SIGNALING_PATHWAY	21	-0.668678	-1.88962	0	0.00543477
GO_SECOND_MESSENGER_MEDIATED_SIGNALING	274	-0.443323	-1.88807	0	0.0055338
GO_CELLULAR_RESPONSE_TO_LIPOPROTEIN_PARTICLE_STIMULUS	27	-0.639553	-1.88795	0.00152207	0.0055106
GO_REGULATION_OF_T_CELL_MEDIATED_IMMUNITY	42	-0.575388	-1.8877	0.00141844	0.00550001
GO_REACTIVE_OXYGEN_SPECIES_METABOLIC_PROCESS	122	-0.48544	-1.8876	0	0.00547713
GO_NEGATIVE_REGULATION_OF_IMMUNE_EFFECTOR_PROCESS	84	-0.512636	-1.88627	0	0.00553676
GO_RESPONSE_TO_MOLECULE_OF_BACTERIAL_ORIGIN	247	-0.451965	-1.8846	0	0.00560394
GO_POSITIVE_REGULATION_OF_INTERLEUKIN_8_PRODUCTION	34	-0.597656	-1.88354	0	0.00564592
GO_REGULATION_OF_NEUROINFLAMMATORY_RESPONSE	24	-0.660848	-1.88239	0.00152439	0.00569567
GO_POSITIVE_REGULATION_OF_TOLL_LIKE_RECEPTOR_SIGNALING_PATHWAY	20	-0.672272	-1.8753	0.0015748	0.00622479
GO_POSITIVE_REGULATION_OF_CELL_ADHESION_MEDIATED_BY_INTEGRIN	17	-0.706669	-1.87162	0.00164474	0.00653963
GO_HOMEOSTASIS_OF_NUMBER_OF_CELLS	200	-0.45202	-1.87078	0	0.00658843
GO_POSITIVE_T_CELL_SELECTION	23	-0.642144	-1.86804	0	0.00677563
GO_CYTOKINE_PRODUCTION_INVOLVED_IN_INFLAMMATORY_RESPONSE	29	-0.614147	-1.86486	0	0.00700112
GO_POSITIVE_REGULATION_OF_CYTOSOLIC_CALCIUM_ION_CONCENTRATION_INVOLVED_IN_PHOSPHOLIPASE_C_ACTIVATING_G_PROTEIN_COUPLED_SIGNALING_PATHWAY	15	-0.723916	-1.86375	0.00165289	0.00709062
GO_REGULATION_OF_GLIOGENESIS	80	-0.513187	-1.86362	0	0.00706537
GO_REGULATION_OF_T_HELPER_CELL_DIFFERENTIATION	24	-0.641483	-1.86296	0.00152905	0.00707951
GO_CALCIUM_MEDIATED_SIGNALING	155	-0.465068	-1.86238	0	0.00712076
GO_REGULATION_OF_STEROL_TRANSPORT	27	-0.624524	-1.8601	0.00148588	0.00728499
GO_REGULATION_OF_OSTEOCLAST_DIFFERENTIATION	40	-0.579316	-1.85986	0	0.00728637
GO_REGULATION_OF_LEUKOCYTE_MIGRATION	138	-0.472152	-1.85807	0	0.00745618
GO_NEGATIVE_REGULATION_OF_PHAGOCYTOSIS	18	-0.683089	-1.85456	0	0.00775386
GO_LEUKOCYTE_APOPTOTIC_PROCESS	83	-0.502049	-1.85289	0	0.00787864
GO_POSITIVE_REGULATION_OF_MACROPHAGE_MIGRATION	17	-0.708735	-1.85268	0	0.00786959
GO_INTEGRIN_MEDIATED_SIGNALING_PATHWAY	85	-0.500376	-1.85138	0.00130208	0.00793647
GO_MYELOID_LEUKOCYTE_MEDIATED_IMMUNITY	417	-0.43047	-1.84913	0	0.00809168
GO_TOLL_LIKE_RECEPTOR_4_SIGNALING_PATHWAY	28	-0.614448	-1.84891	0.00147929	0.00808934
GO_POSITIVE_REGULATION_OF_RECEPTOR_SIGNALING_PATHWAY_VIA_STAT	51	-0.548845	-1.84454	0.00138504	0.00848375
GO_REGULATION_OF_BODY_FLUID_LEVELS	348	-0.429279	-1.8443	0	0.00847987
GO_REGULATION_OF_PHOSPHOLIPASE_ACTIVITY	49	-0.548218	-1.84334	0	0.00853837
GO_COMPLEMENT_ACTIVATION	35	-0.594941	-1.83837	0	0.00907643
GO_REGULATION_OF_NATURAL_KILLER_CELL_ACTIVATION	20	-0.666948	-1.83836	0.0015361	0.00903714
GO_MACROPHAGE_DIFFERENTIATION	37	-0.583319	-1.83672	0	0.00918703
GO_RESPONSE_TO_AMYLOID_BETA	34	-0.595499	-1.83659	0.00304414	0.00915122
GO_CELL_ADHESION_MEDIATED_BY_INTEGRIN	58	-0.53175	-1.83446	0	0.00938563
GO_REGULATION_OF_LIPID_TRANSPORT	60	-0.528182	-1.83164	0	0.00968937
GO_REGULATION_OF_GRANULOCYTE_CHEMOTAXIS	33	-0.587622	-1.8305	0	0.00980882
GO_POSITIVE_REGULATION_OF_CELL_KILLING	27	-0.620859	-1.82895	0.00155763	0.00999107
GO_RESPONSE_TO_PH	25	-0.614875	-1.8286	0.0015873	0.00997744
GO_REGULATION_OF_BEHAVIOR	28	-0.617491	-1.82819	0	0.00998191
GO_POSITIVE_REGULATION_OF_INTERLEUKIN_1_PRODUCTION	30	-0.597456	-1.82811	0.00606061	0.00994386
GO_INTERLEUKIN_1_SECRETION	33	-0.58794	-1.82806	0.00149254	0.00990615
GO_NEGATIVE_REGULATION_OF_LEUKOCYTE_CELL_CELL_ADHESION	87	-0.491702	-1.82704	0	0.010011
GO_REGULATION_OF_MACROPHAGE_ACTIVATION	42	-0.555843	-1.82474	0.00151057	0.0102987
GO_POSITIVE_REGULATION_OF_CYTOKINE_SECRETION	87	-0.491659	-1.82388	0	0.0103673
GO_NEGATIVE_REGULATION_OF_CELL_CELL_ADHESION	122	-0.469029	-1.82334	0	0.0104107
GO_POSITIVE_REGULATION_OF_LIPID_LOCALIZATION	49	-0.554845	-1.82259	0.00141844	0.0105021
GO_NEGATIVE_REGULATION_OF_TISSUE_REMODELING	16	-0.68217	-1.82098	0.00332779	0.0106851
GO_ENDOCYTOSIS	420	-0.417357	-1.82058	0	0.0107132
GO_REGULATION_OF_CHOLESTEROL_EFFLUX	17	-0.685791	-1.82035	0.00784929	0.0106938
GO_INOSITOL_TRISPHOSPHATE_BIOSYNTHETIC_PROCESS	16	-0.696422	-1.81962	0.0016129	0.0107318
GO_NATURAL_KILLER_CELL_MEDIATED_IMMUNITY	29	-0.604298	-1.81887	0.00757576	0.0107829
GO_CYTOSOLIC_CALCIUM_ION_TRANSPORT	110	-0.472655	-1.81515	0	0.0112853
GO_SEQUESTERING_OF_CALCIUM_ION	86	-0.492551	-1.81513	0	0.0112474
GO_NEGATIVE_REGULATION_OF_G_PROTEIN_COUPLED_RECEPTOR_SIGNALING_PATHWAY	34	-0.572881	-1.81344	0.00151745	0.0114424
GO_MONOCYTE_CHEMOTAXIS	35	-0.56839	-1.81343	0	0.0113975
GO_T_CELL_CYTOKINE_PRODUCTION	29	-0.599027	-1.81252	0.00466563	0.011475
GO_DETECTION_OF_EXTERNAL_BIOTIC_STIMULUS	15	-0.706327	-1.81167	0.00164204	0.0115547
GO_MYELOID_CELL_DIFFERENTIATION	324	-0.420851	-1.80964	0	0.0118397
GO_MATURE_B_CELL_DIFFERENTIATION_INVOLVED_IN_IMMUNE_RESPONSE	17	-0.672259	-1.80669	0.00315457	0.0122268
GO_NEGATIVE_REGULATION_OF_CYTOKINE_SECRETION	43	-0.540868	-1.80588	0.00145138	0.0122934
GO_POSITIVE_REGULATION_OF_ERK1_AND_ERK2_CASCADE	135	-0.460565	-1.80567	0	0.0122752
GO_SUPEROXIDE_METABOLIC_PROCESS	52	-0.532894	-1.80538	0.0013986	0.012267
GO_GRANULOCYTE_DIFFERENTIATION	26	-0.615766	-1.80494	0.00595238	0.0122878
GO_T_HELPER_1_TYPE_IMMUNE_RESPONSE	32	-0.59139	-1.80391	0.00139276	0.0123658
GO_MYELOID_CELL_DEVELOPMENT	52	-0.531096	-1.80286	0.00137552	0.012481
GO_REGULATION_OF_HEMOPOIESIS	371	-0.418705	-1.80279	0	0.0124435
GO_REGULATION_OF_TYPE_2_IMMUNE_RESPONSE	21	-0.647911	-1.8026	0.00632911	0.0124125
GO_DIVALENT_INORGANIC_CATION_HOMEOSTASIS	298	-0.426595	-1.80059	0	0.0126736
GO_RHO_PROTEIN_SIGNAL_TRANSDUCTION	165	-0.441779	-1.79875	0	0.0129801
GO_POSITIVE_REGULATION_OF_PEPTIDYL_TYROSINE_PHOSPHORYLATION	126	-0.460677	-1.79267	0	0.0139419
GO_CD8_POSITIVE_ALPHA_BETA_T_CELL_ACTIVATION	15	-0.682364	-1.7853	0.00325733	0.0153308
GO_REGULATION_OF_TISSUE_REMODELING	52	-0.519037	-1.77737	0.00280505	0.0167796
GO_SMALL_GTPASE_MEDIATED_SIGNAL_TRANSDUCTION	470	-0.404793	-1.77426	0	0.0173448
GO_ICOSANOID_BIOSYNTHETIC_PROCESS	30	-0.581717	-1.77415	0.00308642	0.0172968
GO_REGULATION_OF_LONG_TERM_SYNAPTIC_POTENTIATION	31	-0.567978	-1.7718	0.00761035	0.0177109
GO_ERK1_AND_ERK2_CASCADE	207	-0.422546	-1.77174	0	0.0176528
GO_POSITIVE_REGULATION_OF_PHOSPHOLIPASE_ACTIVITY	41	-0.552806	-1.7714	0.00144718	0.0176621
GO_REGULATION_OF_T_HELPER_1_TYPE_IMMUNE_RESPONSE	18	-0.654906	-1.76996	0.00638978	0.0178924
GO_RESPONSE_TO_BACTERIUM	380	-0.409739	-1.76962	0	0.0179038
GO_T_CELL_SELECTION	34	-0.563784	-1.76825	0.00600601	0.0181284
GO_REGULATION_OF_LEUKOCYTE_CHEMOTAXIS	78	-0.484314	-1.76814	0.00273224	0.0180788
GO_NEGATIVE_REGULATION_OF_ALPHA_BETA_T_CELL_ACTIVATION	28	-0.596816	-1.76781	0.0046083	0.0181011
GO_ADAPTATION_OF_SIGNALING_PATHWAY	15	-0.685305	-1.76774	0.00511073	0.0180431
GO_POSITIVE_REGULATION_OF_ANTIGEN_RECEPTOR_MEDIATED_SIGNALING_PATHWAY	18	-0.659686	-1.76609	0.009375	0.0182974
GO_INTERLEUKIN_6_SECRETION	31	-0.57914	-1.76521	0.00921659	0.0184283
GO_INOSITOL_PHOSPHATE_BIOSYNTHETIC_PROCESS	30	-0.582684	-1.76269	0.00311042	0.018829
GO_DEFENSE_RESPONSE_TO_OTHER_ORGANISM	279	-0.417446	-1.75863	0	0.0196994
GO_LEUKOCYTE_TETHERING_OR_ROLLING	20	-0.627383	-1.75838	0.00478469	0.0196805
GO_ASTROCYTE_ACTIVATION	15	-0.680856	-1.75739	0.00518135	0.0198049
GO_NATURAL_KILLER_CELL_DIFFERENTIATION	17	-0.663398	-1.75505	0.00829187	0.0201694
GO_CHOLESTEROL_EFFLUX	24	-0.606225	-1.75443	0.00477707	0.0202216
GO_PLATELET_AGGREGATION	48	-0.525922	-1.7532	0.00570613	0.0204004
GO_REGULATION_OF_PRODUCTION_OF_MOLECULAR_MEDIATOR_OF_IMMUNE_RESPONSE	98	-0.457931	-1.75178	0	0.0206812
GO_NEGATIVE_REGULATION_OF_CELLULAR_RESPONSE_TO_INSULIN_STIMULUS	31	-0.567198	-1.75035	0.00436047	0.0209507
GO_MONONUCLEAR_CELL_DIFFERENTIATION	30	-0.572562	-1.74811	0	0.0213449
GO_TOLL_LIKE_RECEPTOR_3_SIGNALING_PATHWAY	18	-0.639488	-1.74793	0.00496689	0.0213125
GO_REGULATION_OF_RECEPTOR_SIGNALING_PATHWAY_VIA_STAT	75	-0.4809	-1.74392	0.00264901	0.0223098
GO_ACYLGLYCEROL_METABOLIC_PROCESS	38	-0.537972	-1.74168	0.004329	0.02273
GO_REGULATION_OF_IMMUNOGLOBULIN_PRODUCTION	42	-0.533877	-1.73746	0.00433526	0.0237444
GO_POSITIVE_REGULATION_OF_SMOOTH_MUSCLE_CELL_MIGRATION	35	-0.55275	-1.73636	0.00903614	0.0239039
GO_REGULATION_OF_NEUTROPHIL_MIGRATION	26	-0.576465	-1.73527	0.00783699	0.0240844
GO_G_PROTEIN_COUPLED_RECEPTOR_SIGNALING_PATHWAY_COUPLED_TO_CYCLIC_NUCLEOTIDE_SECOND_MESSENGER	118	-0.44623	-1.73372	0	0.0243677
GO_BONE_CELL_DEVELOPMENT	28	-0.572201	-1.73286	0.0091047	0.0245647
GO_REGULATION_OF_FATTY_ACID_TRANSPORT	17	-0.648023	-1.73087	0.00950872	0.0250518
GO_POSITIVE_REGULATION_OF_INTERLEUKIN_1_SECRETION	19	-0.620998	-1.73009	0.0146104	0.0251415
GO_POSITIVE_REGULATION_OF_RHO_PROTEIN_SIGNAL_TRANSDUCTION	16	-0.661437	-1.72948	0.0156794	0.0252408
GO_POSITIVE_REGULATION_OF_DEFENSE_RESPONSE	356	-0.400193	-1.72706	0	0.0258326
GO_REGULATION_OF_CALCIUM_ION_TRANSPORT	157	-0.42637	-1.71829	0	0.0280923
GO_MYELIN_ASSEMBLY	18	-0.630782	-1.71818	0.0102916	0.0280178
GO_GLIAL_CELL_MIGRATION	39	-0.533057	-1.71479	0.0046083	0.0289183
GO_INTERLEUKIN_8_SECRETION	20	-0.622371	-1.71475	0.00815661	0.0288361
GO_REGULATION_OF_SYNCYTIUM_FORMATION_BY_PLASMA_MEMBRANE_FUSION	17	-0.633934	-1.71301	0.00857633	0.0292435
GO_POSITIVE_REGULATION_OF_PHOSPHATIDYLINOSITOL_3_KINASE_SIGNALING	63	-0.491873	-1.71285	0.00531209	0.0292066
GO_DEVELOPMENTAL_PIGMENTATION	31	-0.548989	-1.71225	0.00458015	0.0293258
GO_NEGATIVE_REGULATION_OF_CD4_POSITIVE_ALPHA_BETA_T_CELL_DIFFERENTIATION	17	-0.633589	-1.71204	0.00805153	0.0293077
GO_REGULATION_OF_INNATE_IMMUNE_RESPONSE	329	-0.402671	-1.71064	0	0.0296495
GO_REGULATION_OF_MONOCYTE_CHEMOTAXIS	20	-0.613462	-1.70948	0.0204403	0.0299119
GO_CELLULAR_RESPONSE_TO_PROSTAGLANDIN_E_STIMULUS	15	-0.644711	-1.70929	0.00810373	0.0298657
GO_T_HELPER_17_TYPE_IMMUNE_RESPONSE	19	-0.617684	-1.70876	0.00947867	0.0299596
GO_POSITIVE_REGULATION_OF_ENDOCYTOSIS	74	-0.474979	-1.70794	0	0.0301107
GO_REGULATION_OF_MACROPHAGE_CHEMOTAXIS	18	-0.638981	-1.70546	0.0097561	0.0307977
GO_POSITIVE_REGULATION_OF_LEUKOCYTE_MIGRATION	94	-0.457099	-1.70532	0	0.030723
GO_REGULATION_OF_TOLL_LIKE_RECEPTOR_4_SIGNALING_PATHWAY	15	-0.653827	-1.70404	0.0084317	0.0310166
GO_T_CELL_MEDIATED_CYTOTOXICITY	21	-0.621719	-1.7027	0.00153139	0.0313655
GO_MYELOID_CELL_APOPTOTIC_PROCESS	26	-0.578523	-1.70251	0.0123077	0.0313417
GO_RAS_PROTEIN_SIGNAL_TRANSDUCTION	366	-0.394064	-1.70178	0	0.0314778
GO_REGULATION_OF_LIPID_LOCALIZATION	82	-0.461134	-1.69974	0	0.0320541
GO_CELLULAR_RESPONSE_TO_PROSTAGLANDIN_STIMULUS	17	-0.636396	-1.69948	0.0131579	0.0320332
GO_TYPE_2_IMMUNE_RESPONSE	25	-0.571182	-1.69855	0.00920245	0.0322431
GO_POSITIVE_REGULATION_OF_LYMPHOCYTE_MEDIATED_IMMUNITY	58	-0.490284	-1.69809	0.00420168	0.0322833
GO_SECONDARY_ALCOHOL_METABOLIC_PROCESS	61	-0.482594	-1.69771	0.00933333	0.0323329
GO_REGULATION_OF_ACTIN_CYTOSKELETON_REORGANIZATION	28	-0.562771	-1.69529	0.010687	0.0330446
GO_POSITIVE_REGULATION_OF_REACTIVE_OXYGEN_SPECIES_METABOLIC_PROCESS	34	-0.547325	-1.69162	0.00424328	0.0341639
GO_POSITIVE_REGULATION_OF_INTERLEUKIN_12_PRODUCTION	24	-0.581775	-1.6911	0.0159744	0.0342611
GO_POSITIVE_REGULATION_OF_JUN_KINASE_ACTIVITY	66	-0.475134	-1.69085	0.00660502	0.0342393
GO_REGULATION_OF_SUPEROXIDE_ANION_GENERATION	16	-0.645657	-1.68994	0.00856164	0.0344582
GO_ACTIN_CYTOSKELETON_REORGANIZATION	89	-0.454717	-1.68992	0.00127227	0.0343785
GO_POSITIVE_REGULATION_OF_SMALL_GTPASE_MEDIATED_SIGNAL_TRANSDUCTION	49	-0.503861	-1.68732	0.00412088	0.0351764
GO_ACTIVATION_OF_INNATE_IMMUNE_RESPONSE	246	-0.401899	-1.68469	0	0.035902
GO_RESPONSE_TO_THYROID_HORMONE	21	-0.599407	-1.68237	0.0181818	0.0366116
GO_VASCULAR_ASSOCIATED_SMOOTH_MUSCLE_CELL_MIGRATION	20	-0.603605	-1.68195	0.0162866	0.036672
GO_NEGATIVE_REGULATION_OF_BLOOD_VESSEL_ENDOTHELIAL_CELL_MIGRATION	29	-0.553729	-1.68164	0.00314961	0.0366952
GO_TISSUE_REMODELING	126	-0.431106	-1.68145	0	0.0366594
GO_NEGATIVE_REGULATION_OF_CELL_ADHESION	205	-0.410568	-1.67882	0	0.0374472
GO_LEUKOCYTE_ADHESION_TO_VASCULAR_ENDOTHELIAL_CELL	28	-0.559601	-1.67645	0.00758725	0.038224
GO_ADENYLATE_CYCLASE_ACTIVATING_G_PROTEIN_COUPLED_RECEPTOR_SIGNALING_PATHWAY	69	-0.473895	-1.67579	0.00675676	0.0384056
GO_NEGATIVE_REGULATION_OF_TUMOR_NECROSIS_FACTOR_SUPERFAMILY_CYTOKINE_PRODUCTION	39	-0.525389	-1.67505	0.0130814	0.0385499
GO_POSITIVE_REGULATION_OF_LIPASE_ACTIVITY	49	-0.497503	-1.67443	0.00137363	0.0386614
GO_LIPOPOLYSACCHARIDE_MEDIATED_SIGNALING_PATHWAY	48	-0.499926	-1.6727	0.00980392	0.0392322
GO_BONE_REMODELING	64	-0.480232	-1.67185	0.00135685	0.0394452
GO_RUFFLE_ORGANIZATION	45	-0.49813	-1.66521	0.00869565	0.041906
GO_PIGMENT_CELL_DIFFERENTIATION	26	-0.576771	-1.66425	0.0123457	0.0422035
GO_SYNCYTIUM_FORMATION	34	-0.537885	-1.66408	0.0131579	0.0421269
GO_PHAGOSOME_MATURATION	36	-0.527182	-1.66318	0.00980392	0.0423793
GO_NEGATIVE_REGULATION_OF_MYELOID_LEUKOCYTE_DIFFERENTIATION	34	-0.523724	-1.66295	0.00762195	0.0423428
GO_LYMPHOCYTE_COSTIMULATION	42	-0.512323	-1.66154	0.0057971	0.0428011
GO_CELLULAR_EXTRAVASATION	49	-0.494215	-1.66056	0.00428571	0.0430517
GO_MYELOID_CELL_HOMEOSTASIS	122	-0.42555	-1.66009	0.00246914	0.043143
GO_REGULATION_OF_CELL_SHAPE	127	-0.424963	-1.65848	0.00125313	0.0436957
GO_CELL_CELL_RECOGNITION	31	-0.525193	-1.65727	0.011782	0.0440633
GO_POSITIVE_REGULATION_OF_INTERFERON_BETA_PRODUCTION	30	-0.550258	-1.65716	0.014771	0.0439879
GO_POSITIVE_REGULATION_OF_JNK_CASCADE	112	-0.431593	-1.65617	0.00252844	0.0442571
GO_NEGATIVE_REGULATION_OF_LEUKOCYTE_MIGRATION	30	-0.549427	-1.65534	0.00625978	0.044516
GO_DEFENSE_RESPONSE_TO_GRAM_NEGATIVE_BACTERIUM	27	-0.5529	-1.65518	0.0174051	0.0444585
GO_TISSUE_HOMEOSTASIS	146	-0.418589	-1.65479	0	0.0445351
GO_T_CELL_MIGRATION	43	-0.502439	-1.65385	0.00143472	0.0447883
GO_NEGATIVE_REGULATION_OF_INFLAMMATORY_RESPONSE	98	-0.441248	-1.65375	0.00379747	0.0447029
GO_CELL_CELL_ADHESION_MEDIATED_BY_INTEGRIN	16	-0.623548	-1.65298	0.0194175	0.0448846
GO_GLYCEROLIPID_METABOLIC_PROCESS	171	-0.410581	-1.65194	0	0.0452419
GO_POSITIVE_REGULATION_OF_PROTEIN_TYROSINE_KINASE_ACTIVITY	42	-0.509817	-1.65137	0.0124654	0.0454016
GO_RESPONSE_TO_PROSTAGLANDIN	22	-0.561513	-1.64538	0.0159236	0.0480635
GO_POSITIVE_REGULATION_OF_ALCOHOL_BIOSYNTHETIC_PROCESS	15	-0.641252	-1.64411	0.0185811	0.048507
GO_REGULATION_OF_ACUTE_INFLAMMATORY_RESPONSE	27	-0.54695	-1.6433	0.0173502	0.0487721
GO_REGULATION_OF_CHEMOTAXIS	153	-0.415429	-1.64314	0.0023753	0.0487024
GO_POSITIVE_REGULATION_OF_ORGANIC_ACID_TRANSPORT	21	-0.581188	-1.64166	0.0141732	0.0492344
GO_PIGMENT_GRANULE_ORGANIZATION	21	-0.577119	-1.64129	0.0232558	0.0492959
GO_REGULATION_OF_CALCIUM_ION_TRANSPORT_INTO_CYTOSOL	67	-0.460019	-1.63997	0.00411523	0.0498132
GO_NEGATIVE_REGULATION_OF_ENDOTHELIAL_CELL_PROLIFERATION	28	-0.542669	-1.63949	0.00925926	0.0498867
GO_CELLULAR_ION_HOMEOSTASIS	409	-0.377146	-1.63629	0	0.0512214
GO_POSITIVE_REGULATION_OF_GRANULOCYTE_CHEMOTAXIS	17	-0.612583	-1.63344	0.0210016	0.0524784
GO_TAXIS	438	-0.378976	-1.63335	0	0.052365
GO_RESPONSE_TO_PROSTAGLANDIN_E	18	-0.603707	-1.63304	0.0251256	0.0523997
GO_POLYOL_BIOSYNTHETIC_PROCESS	55	-0.476545	-1.63156	0.00409836	0.0528979
GO_REGULATION_OF_JUN_KINASE_ACTIVITY	78	-0.445116	-1.63129	0.00522193	0.0528872
GO_REGULATION_OF_PHOSPHATIDYLINOSITOL_3_KINASE_SIGNALING	91	-0.436057	-1.62935	0.00256082	0.0537227
GO_AMYLOID_PRECURSOR_PROTEIN_CATABOLIC_PROCESS	34	-0.521715	-1.62931	0.0107527	0.0535944
GO_POSITIVE_REGULATION_OF_PROTEIN_KINASE_B_SIGNALING	122	-0.419441	-1.6286	0.00364964	0.0537824
GO_REGULATION_OF_LIPASE_ACTIVITY	65	-0.46078	-1.62642	0.0082531	0.0547893
GO_WOUND_HEALING	400	-0.373685	-1.62607	0	0.0548324
GO_REGULATION_OF_PEPTIDYL_TYROSINE_PHOSPHORYLATION	182	-0.399999	-1.62564	0	0.0548671
GO_DEFINITIVE_HEMOPOIESIS	19	-0.591838	-1.62473	0.0243506	0.0551791
GO_T_CELL_CHEMOTAXIS	16	-0.612168	-1.62399	0.0189003	0.0554675
GO_POSITIVE_REGULATION_OF_LIPID_KINASE_ACTIVITY	27	-0.549718	-1.62392	0.0266876	0.0553628
GO_REGULATION_OF_AMYLOID_PRECURSOR_PROTEIN_CATABOLIC_PROCESS	25	-0.558431	-1.62221	0.0271903	0.0560713
GO_CYTOKINE_PRODUCTION_INVOLVED_IN_IMMUNE_RESPONSE	75	-0.446705	-1.62215	0.00250627	0.0559549
GO_REGULATION_OF_VESICLE_MEDIATED_TRANSPORT	382	-0.375349	-1.62125	0	0.0563004
GO_NEGATIVE_REGULATION_OF_INNATE_IMMUNE_RESPONSE	33	-0.519429	-1.62042	0.0136986	0.056559
GO_REGULATION_OF_LIPID_KINASE_ACTIVITY	51	-0.482915	-1.61922	0.0109141	0.0570979
GO_PEPTIDYL_TYROSINE_MODIFICATION	271	-0.382266	-1.61849	0	0.0573327
GO_RESPONSE_TO_WOUNDING	481	-0.367129	-1.61738	0	0.0577954
GO_PHOSPHOLIPID_METABOLIC_PROCESS	196	-0.392778	-1.61629	0	0.0582444
GO_NEGATIVE_REGULATION_OF_DEFENSE_RESPONSE	137	-0.414726	-1.61527	0	0.0586699
GO_POSITIVE_REGULATION_OF_LEUKOCYTE_CHEMOTAXIS	62	-0.461959	-1.61517	0.0151934	0.0585578
GO_POSITIVE_REGULATION_OF_INTERLEUKIN_6_SECRETION	22	-0.567728	-1.61414	0.0238853	0.0589589
GO_METAL_ION_HOMEOSTASIS	405	-0.373889	-1.6136	0	0.0591647
GO_LAMELLIPODIUM_ORGANIZATION	74	-0.441034	-1.61191	0.00535475	0.0599681
GO_NEGATIVE_REGULATION_OF_OSTEOCLAST_DIFFERENTIATION	17	-0.5983	-1.61159	0.0174051	0.0600046
GO_NEGATIVE_REGULATION_OF_LEUKOCYTE_DIFFERENTIATION	71	-0.443632	-1.60803	0.00797872	0.0616946
GO_PHOTOTRANSDUCTION	25	-0.537487	-1.60794	0.015456	0.0615871
GO_RECEPTOR_SIGNALING_PATHWAY_VIA_STAT	92	-0.434937	-1.60792	0.00508906	0.0614513
GO_POSITIVE_REGULATION_OF_MACROPHAGE_ACTIVATION	21	-0.586763	-1.60769	0.0204724	0.0614206
GO_ORGANIC_ACID_TRANSPORT	207	-0.39086	-1.60708	0.00114416	0.0615697
GO_REGULATION_OF_ION_TRANSPORT	395	-0.370975	-1.60538	0	0.0622855
GO_NEGATIVE_REGULATION_OF_EXOCYTOSIS	24	-0.549846	-1.60503	0.0207668	0.0623404
GO_REGULATION_OF_ANION_TRANSPORT	63	-0.460385	-1.60344	0.00675676	0.0630525
GO_VASCULAR_ENDOTHELIAL_GROWTH_FACTOR_RECEPTOR_SIGNALING_PATHWAY	86	-0.42996	-1.60317	0.00770218	0.0630525
GO_TRIGLYCERIDE_METABOLIC_PROCESS	24	-0.542877	-1.60303	0.0242792	0.06297
GO_CYCLIC_NUCLEOTIDE_MEDIATED_SIGNALING	116	-0.415329	-1.6026	0.0012285	0.063043
GO_AMYLOID_BETA_CLEARANCE	27	-0.54141	-1.60215	0.0208333	0.0631475
GO_NEGATIVE_REGULATION_OF_REGULATED_SECRETORY_PATHWAY	20	-0.579611	-1.60145	0.0240385	0.0634083
GO_POSITIVE_REGULATION_OF_SECRETION	273	-0.377788	-1.60059	0	0.0637498
GO_PHOSPHATIDYLINOSITOL_METABOLIC_PROCESS	80	-0.438104	-1.60007	0.00404858	0.0638801
GO_POSITIVE_REGULATION_OF_TYROSINE_PHOSPHORYLATION_OF_STAT_PROTEIN	36	-0.505571	-1.59974	0.0235641	0.063908
GO_T_CELL_HOMEOSTASIS	28	-0.540287	-1.59438	0.0268562	0.0669943
GO_CALCIUM_ION_TRANSMEMBRANE_TRANSPORT	194	-0.391541	-1.59389	0	0.0671301
GO_RESPONSE_TO_MURAMYL_DIPEPTIDE	17	-0.603232	-1.59385	0.0245499	0.0669964
GO_POSITIVE_REGULATION_OF_MAPK_CASCADE	377	-0.369513	-1.59357	0	0.0670344
GO_LIPID_STORAGE	52	-0.456178	-1.59333	0.0144509	0.0670452
GO_LYMPHOCYTE_MIGRATION	63	-0.452667	-1.59073	0.00413793	0.0683961
GO_STEROL_METABOLIC_PROCESS	68	-0.448925	-1.59042	0.0133156	0.0684312
GO_INOSITOL_LIPID_MEDIATED_SIGNALING	138	-0.410056	-1.58915	0.00240674	0.0689702
GO_PLASMA_LIPOPROTEIN_PARTICLE_CLEARANCE	39	-0.497377	-1.58801	0.0184049	0.0694539
GO_INFLAMMATORY_RESPONSE_TO_ANTIGENIC_STIMULUS	31	-0.518074	-1.58694	0.016129	0.0698965
GO_CATECHOLAMINE_METABOLIC_PROCESS	18	-0.594218	-1.58533	0.03125	0.0707248
GO_GLYCEROPHOSPHOLIPID_CATABOLIC_PROCESS	17	-0.577615	-1.58284	0.0403877	0.0721487
GO_HOMEOSTASIS_OF_NUMBER_OF_CELLS_WITHIN_A_TISSUE	25	-0.535564	-1.58199	0.0227618	0.0724952
GO_REGULATION_OF_ORGANIC_ACID_TRANSPORT	37	-0.497523	-1.58152	0.0145773	0.072618
GO_POSITIVE_REGULATION_OF_IMMUNOGLOBULIN_PRODUCTION	26	-0.54038	-1.58116	0.0192593	0.0726848
GO_POSITIVE_REGULATION_OF_TISSUE_REMODELING	22	-0.554011	-1.58091	0.0165563	0.0727072
GO_REGULATION_OF_RELEASE_OF_SEQUESTERED_CALCIUM_ION_INTO_CYTOSOL	53	-0.462779	-1.58058	0.0109439	0.0727411
GO_MULTICELLULAR_ORGANISMAL_HOMEOSTASIS	327	-0.369245	-1.57966	0	0.0731226
GO_POSITIVE_REGULATION_OF_CHEMOKINE_PRODUCTION	40	-0.480083	-1.57783	0.0192044	0.0741344
GO_ADAPTIVE_THERMOGENESIS	110	-0.413172	-1.57769	0.00755667	0.0740545
GO_POSITIVE_REGULATION_OF_MYELOID_CELL_DIFFERENTIATION	70	-0.439391	-1.57758	0.010596	0.0739786
GO_DEFENSE_RESPONSE_TO_GRAM_POSITIVE_BACTERIUM	40	-0.479819	-1.57709	0.0269461	0.0741567
GO_MACROPHAGE_CHEMOTAXIS	25	-0.543303	-1.5757	0.0252366	0.0748793
GO_ACUTE_INFLAMMATORY_RESPONSE	65	-0.448967	-1.57491	0.0139276	0.0752054
GO_INNERVATION	17	-0.585397	-1.57397	0.0341463	0.07565
GO_B_CELL_ACTIVATION_INVOLVED_IN_IMMUNE_RESPONSE	56	-0.463184	-1.57323	0.0151515	0.0759498
GO_REGULATION_OF_PEPTIDE_SECRETION	327	-0.366889	-1.57297	0.00108696	0.0759288
GO_REGULATION_OF_MYELOID_CELL_DIFFERENTIATION	196	-0.382127	-1.57116	0.00113507	0.0769428
GO_DICARBOXYLIC_ACID_TRANSPORT	60	-0.460471	-1.571	0.00960219	0.0768976
GO_INFLAMMATORY_CELL_APOPTOTIC_PROCESS	18	-0.57673	-1.57091	0.0357724	0.0767815
GO_POSITIVE_REGULATION_OF_COLD_INDUCED_THERMOGENESIS	65	-0.44051	-1.56917	0.00543478	0.0777826
GO_INTERFERON_BETA_PRODUCTION	48	-0.471308	-1.56908	0.0144718	0.0776857
GO_REGULATION_OF_ASTROCYTE_DIFFERENTIATION	21	-0.556924	-1.56794	0.0348653	0.0782543
GO_POSITIVE_REGULATION_OF_ION_TRANSPORT	168	-0.387418	-1.56767	0	0.078238
GO_MUSCLE_HYPERTROPHY_IN_RESPONSE_TO_STRESS	15	-0.60131	-1.56757	0.0380795	0.0781224
GO_REGULATION_OF_METAL_ION_TRANSPORT	241	-0.372929	-1.56655	0	0.0786128
GO_POSITIVE_REGULATION_OF_STRESS_ACTIVATED_PROTEIN_KINASE_SIGNALING_CASCADE	134	-0.399391	-1.56654	0.00361446	0.0784493
GO_FC_RECEPTOR_SIGNALING_PATHWAY	165	-0.384308	-1.56638	0.00118906	0.0783831
GO_REGULATION_OF_REGULATED_SECRETORY_PATHWAY	105	-0.415788	-1.56496	0.00377834	0.0791474
GO_NEGATIVE_REGULATION_OF_INTERLEUKIN_1_PRODUCTION	18	-0.583009	-1.56473	0.0317965	0.0791436
GO_POSITIVE_REGULATION_OF_CALCIUM_ION_TRANSPORT	75	-0.431524	-1.56111	0.0169492	0.0813641
GO_TUMOR_NECROSIS_FACTOR_SECRETION	16	-0.586694	-1.56073	0.0432692	0.0814588
GO_REGULATION_OF_T_CELL_CYTOKINE_PRODUCTION	23	-0.546489	-1.56003	0.0279938	0.081763
GO_NEGATIVE_REGULATION_OF_CD4_POSITIVE_ALPHA_BETA_T_CELL_ACTIVATION	21	-0.554874	-1.55959	0.0272873	0.0818743
GO_STEROL_TRANSPORT	66	-0.440555	-1.55849	0.0119048	0.0824804
GO_POSITIVE_REGULATION_OF_MYELOID_LEUKOCYTE_DIFFERENTIATION	41	-0.476631	-1.55662	0.0244957	0.0834732
GO_ZYMOGEN_ACTIVATION	31	-0.504509	-1.55435	0.0200308	0.0848844
GO_LIPID_CATABOLIC_PROCESS	217	-0.372652	-1.55339	0	0.0854226
GO_NEGATIVE_REGULATION_OF_INTERLEUKIN_8_PRODUCTION	15	-0.595325	-1.5519	0.0576271	0.0862495
GO_TOLERANCE_INDUCTION	18	-0.570454	-1.55087	0.0320946	0.0867974
GO_LAMELLIPODIUM_ASSEMBLY	57	-0.443382	-1.55078	0.0134953	0.0866604
GO_LYTIC_VACUOLE_ORGANIZATION	53	-0.452518	-1.55006	0.0289256	0.0869869
GO_NEGATIVE_REGULATION_OF_SMOOTH_MUSCLE_CELL_MIGRATION	20	-0.547033	-1.54712	0.0404722	0.0888219
GO_INTERFERON_ALPHA_PRODUCTION	27	-0.516238	-1.54671	0.0403727	0.088936
GO_MONOCARBOXYLIC_ACID_TRANSPORT	96	-0.414092	-1.54431	0.00755667	0.0904563
GO_CELLULAR_RESPONSE_TO_ALCOHOL	71	-0.426882	-1.54408	0.0213618	0.0904169
GO_REGULATION_OF_MONOCYTE_DIFFERENTIATION	18	-0.579175	-1.54319	0.0424528	0.0909096
GO_RESPONSE_TO_VITAMIN_D	25	-0.534638	-1.54251	0.0360502	0.0912108
GO_REGULATION_OF_REACTIVE_OXYGEN_SPECIES_METABOLIC_PROCESS	81	-0.415539	-1.54187	0.008	0.0915276
GO_TEMPERATURE_HOMEOSTASIS	128	-0.392436	-1.54067	0.00622665	0.0922118
GO_PLASMA_MEMBRANE_TUBULATION	18	-0.570295	-1.54008	0.0325077	0.0924287
GO_POSITIVE_REGULATION_OF_PEPTIDE_SECRETION	186	-0.377826	-1.54007	0.00357995	0.0922434
GO_GLYCEROLIPID_CATABOLIC_PROCESS	34	-0.496143	-1.53852	0.0238095	0.0932417
GO_NEGATIVE_REGULATION_OF_LIPID_CATABOLIC_PROCESS	16	-0.596273	-1.53845	0.0454545	0.0931126
GO_REGULATION_OF_HOMOTYPIC_CELL_CELL_ADHESION	19	-0.563506	-1.53831	0.0466989	0.0930375
GO_NERVE_DEVELOPMENT	46	-0.468511	-1.53757	0.0231608	0.0933652
GO_T_CELL_LINEAGE_COMMITMENT	16	-0.590997	-1.53709	0.0559006	0.0935218
GO_REGULATION_OF_PROTEIN_LOCALIZATION_TO_CELL_SURFACE	31	-0.5015	-1.53593	0.0208024	0.0941543
GO_DIVALENT_INORGANIC_CATION_TRANSPORT	300	-0.36061	-1.53577	0.00108108	0.0940723
GO_PROTEIN_KINASE_B_SIGNALING	182	-0.378137	-1.53573	0.00461894	0.0939055
GO_REGULATION_OF_NIK_NF_KAPPAB_SIGNALING	84	-0.41502	-1.53478	0.0116883	0.0944704
GO_POSITIVE_REGULATION_OF_CHEMOTAXIS	97	-0.40805	-1.53427	0.019975	0.0946602
GO_ANION_HOMEOSTASIS	35	-0.486994	-1.53367	0.0357654	0.0949343
GO_RESPONSE_TO_ISCHEMIA	36	-0.482974	-1.52908	0.0345324	0.0981995
GO_REGULATION_OF_MAP_KINASE_ACTIVITY	275	-0.362302	-1.52883	0.0010846	0.0982172
GO_REGULATORY_T_CELL_DIFFERENTIATION	20	-0.546339	-1.52867	0.031405	0.0981385
GO_NEGATIVE_REGULATION_OF_LYMPHOCYTE_APOPTOTIC_PROCESS	23	-0.529035	-1.52863	0.0420032	0.0979658
GO_REGULATION_OF_ERYTHROCYTE_DIFFERENTIATION	42	-0.463629	-1.52626	0.0324484	0.0994789
GO_PODOSOME_ASSEMBLY	17	-0.572444	-1.52588	0.0518868	0.0995506
GO_REGULATION_OF_ENDOCYTOSIS	152	-0.38003	-1.52582	0.00839329	0.0994029
GO_MAINTENANCE_OF_LOCATION	242	-0.365708	-1.52338	0	0.101158
GO_POSITIVE_REGULATION_OF_NF_KAPPAB_TRANSCRIPTION_FACTOR_ACTIVITY	134	-0.385585	-1.52231	0.00609756	0.101848
GO_REGULATION_OF_AMYLOID_BETA_FORMATION	20	-0.551212	-1.52155	0.0376432	0.102256
GO_DENDRITIC_SPINE_MAINTENANCE	16	-0.576481	-1.51857	0.0413793	0.104588
GO_ICOSANOID_METABOLIC_PROCESS	45	-0.464933	-1.51842	0.015896	0.104515
GO_NEGATIVE_REGULATION_OF_SECRETION	142	-0.387211	-1.5176	0.00247832	0.10494
GO_FATTY_ACID_DERIVATIVE_TRANSPORT	22	-0.542629	-1.5175	0.0472313	0.104798
GO_PEPTIDE_SECRETION	402	-0.350918	-1.5167	0	0.105235
GO_ANATOMICAL_STRUCTURE_MATURATION	109	-0.398369	-1.51608	0.00380711	0.105493
GO_PLATELET_MORPHOGENESIS	17	-0.556171	-1.51517	0.0574713	0.106062
GO_FEAR_RESPONSE	21	-0.525453	-1.5145	0.0387097	0.106404
GO_MELANOCYTE_DIFFERENTIATION	16	-0.573469	-1.51359	0.0487805	0.106975
GO_AMINO_ACID_TRANSPORT	90	-0.402493	-1.51259	0.0143229	0.1076
GO_ORGANIC_HYDROXY_COMPOUND_TRANSPORT	133	-0.37902	-1.51105	0.0119617	0.108721
GO_REGULATION_OF_COAGULATION	55	-0.44119	-1.51076	0.0227596	0.108734
GO_LONG_TERM_MEMORY	25	-0.513523	-1.51013	0.0401235	0.109074
GO_NEGATIVE_REGULATION_OF_CELL_MOTILITY	211	-0.366237	-1.51003	0	0.108943
GO_INTEGRIN_ACTIVATION	21	-0.545944	-1.50854	0.0427215	0.110069
GO_POSITIVE_REGULATION_OF_CALCIUM_MEDIATED_SIGNALING	33	-0.481643	-1.50724	0.0429448	0.110908
GO_NITRIC_OXIDE_SYNTHASE_BIOSYNTHETIC_PROCESS	16	-0.575094	-1.50723	0.0457516	0.110702
GO_HOMOTYPIC_CELL_CELL_ADHESION	65	-0.42663	-1.50686	0.0188934	0.110795
GO_REGULATION_OF_CELLULAR_RESPONSE_TO_INSULIN_STIMULUS	57	-0.44124	-1.50658	0.0411932	0.110805
GO_REGULATION_OF_GLIAL_CELL_PROLIFERATION	23	-0.529526	-1.50581	0.0496894	0.111271
GO_CERAMIDE_CATABOLIC_PROCESS	15	-0.574433	-1.50424	0.0483333	0.112314
GO_MUSCLE_CELL_MIGRATION	73	-0.418337	-1.50398	0.0169492	0.112326
GO_PHOSPHATIDYLINOSITOL_BIOSYNTHETIC_PROCESS	106	-0.397052	-1.50397	0.00770218	0.112126
GO_POSITIVE_REGULATION_OF_REGULATED_SECRETORY_PATHWAY	34	-0.47561	-1.50361	0.0333333	0.112253
GO_MYOBLAST_FUSION	22	-0.529976	-1.50339	0.0464	0.112204
GO_LIPID_PHOSPHORYLATION	53	-0.43292	-1.5011	0.0415512	0.113875
GO_POSITIVE_REGULATION_OF_MAP_KINASE_ACTIVITY	209	-0.365093	-1.50036	0.00338601	0.114287
GO_PHYSIOLOGICAL_CARDIAC_MUSCLE_HYPERTROPHY	23	-0.514609	-1.49981	0.0516129	0.114492
GO_POSITIVE_REGULATION_OF_LIPID_METABOLIC_PROCESS	97	-0.39855	-1.49635	0.016624	0.117306
GO_REGULATION_OF_G_PROTEIN_COUPLED_RECEPTOR_SIGNALING_PATHWAY	91	-0.397012	-1.49627	0.0179257	0.117139
GO_INOSITOL_PHOSPHATE_METABOLIC_PROCESS	41	-0.459419	-1.49568	0.0348331	0.117412
GO_I_KAPPAB_KINASE_NF_KAPPAB_SIGNALING	218	-0.361581	-1.4956	0.00347222	0.117264
GO_POSITIVE_REGULATION_OF_AMINE_TRANSPORT	18	-0.549777	-1.49337	0.0417957	0.11892
GO_MEMBRANE_PROTEIN_PROTEOLYSIS	51	-0.438585	-1.4904	0.0331034	0.121425
GO_JNK_CASCADE	172	-0.369388	-1.48986	0.0058548	0.121658
GO_NEGATIVE_REGULATION_OF_ALPHA_BETA_T_CELL_DIFFERENTIATION	19	-0.54499	-1.4887	0.0613497	0.122554
GO_CELLULAR_RESPONSE_TO_FATTY_ACID	41	-0.46141	-1.48852	0.042796	0.122507
GO_POSITIVE_REGULATION_OF_TYPE_I_INTERFERON_PRODUCTION	72	-0.411581	-1.48843	0.0420499	0.122373
GO_PH_REDUCTION	39	-0.457859	-1.48796	0.0470588	0.122561
GO_POSITIVE_REGULATION_OF_SIGNALING_RECEPTOR_ACTIVITY	28	-0.497974	-1.48653	0.0555556	0.123596
GO_ANTIGEN_PROCESSING_AND_PRESENTATION	169	-0.368826	-1.48605	0.00952381	0.123817
GO_OSTEOCLAST_DEVELOPMENT	15	-0.568597	-1.48589	0.0737705	0.123763
GO_POSITIVE_REGULATION_OF_CALCIUM_ION_TRANSPORT_INTO_CYTOSOL	34	-0.476551	-1.48559	0.0512821	0.123818
GO_GLYCEROPHOSPHOLIPID_METABOLIC_PROCESS	133	-0.377142	-1.48417	0.0122699	0.124939
GO_POSITIVE_REGULATION_OF_CELLULAR_CARBOHYDRATE_METABOLIC_PROCESS	32	-0.474679	-1.48388	0.0482866	0.124989
GO_SMOOTH_MUSCLE_CELL_MIGRATION	62	-0.418579	-1.48378	0.0250696	0.124827
GO_NEGATIVE_REGULATION_OF_HEMOPOIESIS	114	-0.384423	-1.48378	0.0174346	0.124601
GO_T_CELL_RECEPTOR_SIGNALING_PATHWAY	145	-0.371765	-1.48324	0.00843373	0.124899
GO_PROTEIN_DESTABILIZATION	36	-0.467443	-1.48252	0.0530973	0.125301
GO_CRANIAL_NERVE_DEVELOPMENT	27	-0.497949	-1.47962	0.0592824	0.127853
GO_MYD88_INDEPENDENT_TOLL_LIKE_RECEPTOR_SIGNALING_PATHWAY	30	-0.481684	-1.47884	0.0552995	0.12836
GO_POSITIVE_REGULATION_OF_RECEPTOR_INTERNALIZATION	18	-0.539238	-1.47784	0.0609555	0.129087
GO_REGULATION_OF_PROTEIN_POLYUBIQUITINATION	19	-0.524722	-1.47605	0.0622951	0.130494
GO_L_AMINO_ACID_TRANSPORT	47	-0.439851	-1.47586	0.0417266	0.130457
GO_REGULATION_OF_PROTEIN_TYROSINE_KINASE_ACTIVITY	73	-0.408777	-1.47583	0.0171958	0.13024
GO_CGMP_MEDIATED_SIGNALING	20	-0.531794	-1.47534	0.0702614	0.130475
GO_MYOTUBE_DIFFERENTIATION	65	-0.414738	-1.47466	0.0342105	0.130929
GO_PHOSPHATIDYLINOSITOL_3_KINASE_SIGNALING	111	-0.389122	-1.47412	0.0122549	0.131205
GO_ACIDIC_AMINO_ACID_TRANSPORT	40	-0.466793	-1.47372	0.0504451	0.131376
GO_GLIAL_CELL_DEVELOPMENT	84	-0.401538	-1.47359	0.0266667	0.131272
GO_CELLULAR_PIGMENTATION	44	-0.448125	-1.47335	0.0480905	0.131281
GO_POSITIVE_REGULATION_OF_CARDIAC_MUSCLE_CELL_DIFFERENTIATION	16	-0.543936	-1.47009	0.0770466	0.134195
GO_AMYLOID_PRECURSOR_PROTEIN_METABOLIC_PROCESS	46	-0.438828	-1.46941	0.0361613	0.134586
GO_REGULATION_OF_PLASMA_LIPOPROTEIN_PARTICLE_LEVELS	62	-0.418829	-1.46793	0.0254011	0.135711
GO_LYMPHOCYTE_APOPTOTIC_PROCESS	54	-0.431292	-1.4668	0.031856	0.136504
GO_POSITIVE_REGULATION_OF_PRODUCTION_OF_MOLECULAR_MEDIATOR_OF_IMMUNE_RESPONSE	66	-0.419415	-1.46538	0.030303	0.137723
GO_ACTIVATION_OF_GTPASE_ACTIVITY	76	-0.403535	-1.46497	0.0233463	0.137951
GO_LIPID_LOCALIZATION	250	-0.351242	-1.464	0.00337458	0.138706
GO_POSITIVE_REGULATION_OF_GLIAL_CELL_DIFFERENTIATION	29	-0.481813	-1.46383	0.0384047	0.13867
GO_TRANSCYTOSIS	17	-0.558552	-1.46255	0.0600924	0.13975
GO_REGULATION_OF_ION_TRANSMEMBRANE_TRANSPORT	276	-0.348383	-1.46247	0.00222469	0.139568
GO_POSITIVE_REGULATION_OF_T_CELL_MIGRATION	24	-0.501824	-1.46201	0.0634675	0.139785
GO_ARTERY_MORPHOGENESIS	50	-0.429202	-1.46163	0.0444444	0.139928
GO_GLIAL_CELL_PROLIFERATION	35	-0.468182	-1.46126	0.0412518	0.140039
GO_POSITIVE_REGULATION_OF_LEUKOCYTE_APOPTOTIC_PROCESS	23	-0.508622	-1.46075	0.0613208	0.140256
GO_SIALYLATION	15	-0.577641	-1.46028	0.0709571	0.140506
GO_REGULATION_OF_PROTEIN_HOMOOLIGOMERIZATION	16	-0.549108	-1.45995	0.0679612	0.14063
GO_PINOCYTOSIS	20	-0.525221	-1.45956	0.0655226	0.140806
GO_LYMPHOCYTE_CHEMOTAXIS	31	-0.470112	-1.45801	0.0560748	0.142127
GO_NEGATIVE_REGULATION_OF_COAGULATION	31	-0.473587	-1.45798	0.0530973	0.141915
GO_REGULATION_OF_STRIATED_MUSCLE_CELL_DIFFERENTIATION	68	-0.406851	-1.45715	0.0332889	0.142521
GO_NEGATIVE_REGULATION_OF_BLOOD_PRESSURE	26	-0.498098	-1.457	0.0644678	0.142432
GO_LONG_TERM_SYNAPTIC_POTENTIATION	52	-0.42898	-1.45576	0.0488827	0.143474
GO_NEGATIVE_REGULATION_OF_CYTOKINE_BIOSYNTHETIC_PROCESS	23	-0.50876	-1.45537	0.0552326	0.143647
GO_MONOVALENT_INORGANIC_CATION_HOMEOSTASIS	102	-0.384098	-1.45524	0.0252525	0.143565
GO_NEGATIVE_REGULATION_OF_LOCOMOTION	250	-0.34508	-1.45491	0.00110619	0.14366
GO_POSITIVE_REGULATION_OF_ACUTE_INFLAMMATORY_RESPONSE	17	-0.547331	-1.45473	0.0710824	0.143595
GO_REACTIVE_OXYGEN_SPECIES_BIOSYNTHETIC_PROCESS	79	-0.404518	-1.4545	0.0270619	0.14359
GO_PIGMENTATION	73	-0.402913	-1.45409	0.0392954	0.143754
GO_ENSHEATHMENT_OF_NEURONS	97	-0.39079	-1.45316	0.0413972	0.14443
GO_ACUTE_PHASE_RESPONSE	24	-0.502682	-1.45309	0.0758514	0.14426
GO_CHEMOKINE_PRODUCTION	63	-0.408044	-1.45275	0.0393487	0.144379
GO_RECEPTOR_CATABOLIC_PROCESS	31	-0.474584	-1.45224	0.048105	0.144652
GO_WALKING_BEHAVIOR	18	-0.537495	-1.45224	0.0561056	0.144411
GO_LIPID_MODIFICATION	185	-0.357353	-1.45136	0.00941176	0.14504
GO_REGULATION_OF_CALCIUM_ION_TRANSMEMBRANE_TRANSPORT	97	-0.385676	-1.45125	0.0222497	0.144904
GO_RECEPTOR_MEDIATED_ENDOCYTOSIS	211	-0.3495	-1.44935	0.00920598	0.146543
GO_CELLULAR_RESPONSE_TO_NUTRIENT	48	-0.433842	-1.44772	0.0416667	0.148028
GO_VACUOLAR_ACIDIFICATION	21	-0.514396	-1.44455	0.0758294	0.151152
GO_ORGANIC_ANION_TRANSPORT	301	-0.338448	-1.44402	0.00548246	0.151451
GO_NEGATIVE_REGULATION_OF_PEPTIDE_SECRETION	89	-0.392204	-1.44342	0.0309278	0.151852
GO_GLYCOSPHINGOLIPID_BIOSYNTHETIC_PROCESS	19	-0.531148	-1.43873	0.0685805	0.156719
GO_DNA_DEMETHYLATION	15	-0.557023	-1.43816	0.0732113	0.157101
GO_TYROSINE_PHOSPHORYLATION_OF_STAT_PROTEIN	47	-0.435013	-1.43778	0.0543634	0.157279
GO_HISTONE_H3_DEACETYLATION	17	-0.54539	-1.43755	0.0801964	0.157284
GO_REGULATION_OF_REACTIVE_OXYGEN_SPECIES_BIOSYNTHETIC_PROCESS	65	-0.413694	-1.43719	0.0343008	0.157464
GO_REGULATION_OF_ADENYLATE_CYCLASE_ACTIVITY	17	-0.535532	-1.43601	0.0730051	0.158461
GO_NEUTRAL_LIPID_METABOLIC_PROCESS	73	-0.399893	-1.43499	0.0375839	0.159353
GO_POSITIVE_REGULATION_OF_INTERFERON_ALPHA_PRODUCTION	21	-0.502628	-1.43329	0.0834621	0.16102
GO_TRANSFERRIN_TRANSPORT	30	-0.466449	-1.43228	0.0658683	0.161866
GO_FC_EPSILON_RECEPTOR_SIGNALING_PATHWAY	104	-0.370657	-1.4322	0.0374532	0.161695
GO_NEGATIVE_REGULATION_OF_PEPTIDYL_TYROSINE_PHOSPHORYLATION	46	-0.430163	-1.43203	0.0557103	0.161613
GO_DETECTION_OF_LIGHT_STIMULUS	27	-0.487349	-1.43161	0.0644678	0.161793
GO_ASTROCYTE_DEVELOPMENT	29	-0.472001	-1.43044	0.0613497	0.162828
GO_NEGATIVE_REGULATION_OF_RESPONSE_TO_EXTERNAL_STIMULUS	229	-0.34544	-1.42996	0.00674916	0.163091
GO_PROTEIN_LIPID_COMPLEX_ASSEMBLY	20	-0.521665	-1.42877	0.0796875	0.164223
GO_POSITIVE_REGULATION_OF_PROTEIN_SERINE_THREONINE_KINASE_ACTIVITY	269	-0.338962	-1.42826	0.00441989	0.164564
GO_NEGATIVE_REGULATION_OF_INTERLEUKIN_2_PRODUCTION	17	-0.524811	-1.42663	0.076324	0.166175
GO_VACUOLE_ORGANIZATION	141	-0.358445	-1.42647	0.0157005	0.166055
GO_POSITIVE_REGULATION_OF_T_CELL_MEDIATED_IMMUNITY	26	-0.481498	-1.42633	0.0590112	0.165959
GO_ACYLGLYCEROL_HOMEOSTASIS	19	-0.519674	-1.42548	0.0864	0.166685
GO_POSITIVE_REGULATION_OF_NEUTROPHIL_MIGRATION	20	-0.516127	-1.42401	0.0729483	0.16817
GO_BLOOD_VESSEL_REMODELING	35	-0.457749	-1.4236	0.0789474	0.16839
GO_REGULATION_OF_LYMPHOCYTE_APOPTOTIC_PROCESS	41	-0.441267	-1.42353	0.0677467	0.168191
GO_POSITIVE_REGULATION_OF_LIPID_BIOSYNTHETIC_PROCESS	57	-0.411081	-1.42262	0.0567867	0.168959
GO_REGULATION_OF_GLIAL_CELL_DIFFERENTIATION	45	-0.430269	-1.42239	0.053719	0.168958
GO_NEUTRAL_LIPID_CATABOLIC_PROCESS	18	-0.52896	-1.42235	0.0750799	0.168743
GO_RESPONSE_TO_ELECTRICAL_STIMULUS	23	-0.494462	-1.42229	0.0910569	0.16853
GO_REGULATION_OF_CALCIUM_MEDIATED_SIGNALING	72	-0.394522	-1.422	0.039897	0.168631
GO_ENDOCYTIC_RECYCLING	38	-0.449469	-1.41937	0.0802377	0.171451
GO_UNSATURATED_FATTY_ACID_BIOSYNTHETIC_PROCESS	31	-0.460894	-1.41883	0.0785185	0.171804
GO_NEGATIVE_REGULATION_OF_PROTEIN_LOCALIZATION_TO_MEMBRANE	23	-0.492276	-1.41862	0.073718	0.171779
GO_POSITIVE_REGULATION_OF_LYMPHOCYTE_MIGRATION	28	-0.472714	-1.41581	0.0849057	0.174903
GO_REGULATION_OF_DEFENSE_RESPONSE_TO_VIRUS_BY_VIRUS	25	-0.478274	-1.41416	0.0909091	0.176613
GO_LOW_DENSITY_LIPOPROTEIN_PARTICLE_CLEARANCE	29	-0.469258	-1.4135	0.0765697	0.177136
GO_GLIOGENESIS	207	-0.340253	-1.41278	0.0134078	0.177675
GO_AMYLOID_BETA_FORMATION	26	-0.473088	-1.41275	0.0741886	0.177429
GO_REGULATION_OF_EXOCYTOSIS	144	-0.355139	-1.41222	0.0169492	0.177765
GO_LOCOMOTORY_BEHAVIOR	109	-0.371427	-1.41024	0.028536	0.179901
GO_REGULATION_OF_RENAL_SYSTEM_PROCESS	19	-0.508664	-1.40991	0.093949	0.180018
GO_POSITIVE_REGULATION_OF_OSTEOCLAST_DIFFERENTIATION	15	-0.532548	-1.40921	0.113333	0.180548
GO_REGULATION_OF_CYTOKINE_PRODUCTION_INVOLVED_IN_IMMUNE_RESPONSE	63	-0.402828	-1.40891	0.0472973	0.180689
GO_LAMELLIPODIUM_MORPHOGENESIS	17	-0.529589	-1.40726	0.0962145	0.182332
GO_POSITIVE_REGULATION_OF_NIK_NF_KAPPAB_SIGNALING	61	-0.401448	-1.40719	0.058156	0.182141
GO_SUBSTRATE_ADHESION_DEPENDENT_CELL_SPREADING	75	-0.389587	-1.407	0.0536193	0.182108
GO_DEVELOPMENTAL_MATURATION	184	-0.346636	-1.40686	0.0146727	0.181985
GO_REGULATION_OF_PH	70	-0.395851	-1.40479	0.0590659	0.184296
GO_ACUTE_INFLAMMATORY_RESPONSE_TO_ANTIGENIC_STIMULUS	15	-0.546857	-1.4037	0.107926	0.185477
GO_RESPONSE_TO_FLUID_SHEAR_STRESS	31	-0.458696	-1.40357	0.0772871	0.18536
GO_RUFFLE_ASSEMBLY	35	-0.441124	-1.4027	0.0670732	0.186059
GO_REGULATION_OF_B_CELL_MEDIATED_IMMUNITY	35	-0.447877	-1.40244	0.0735294	0.186087
GO_ERYTHROCYTE_DEVELOPMENT	22	-0.484805	-1.40078	0.0781955	0.187867
GO_MEMBRANE_RAFT_ORGANIZATION	18	-0.518277	-1.39741	0.102236	0.191918
GO_IMMUNOGLOBULIN_PRODUCTION_INVOLVED_IN_IMMUNOGLOBULIN_MEDIATED_IMMUNE_RESPONSE	38	-0.440182	-1.39613	0.0639535	0.193312
GO_POSITIVE_REGULATION_OF_BLOOD_VESSEL_DIAMETER	38	-0.435927	-1.39558	0.0692194	0.193698
GO_NEGATIVE_REGULATION_OF_NEURON_APOPTOTIC_PROCESS	109	-0.360522	-1.39386	0.0520446	0.195477
GO_ALCOHOL_METABOLIC_PROCESS	162	-0.34683	-1.39362	0.031401	0.195505
GO_ORGANIC_ACID_TRANSMEMBRANE_TRANSPORT	99	-0.366934	-1.39243	0.0366162	0.196727
GO_CELLULAR_LIPID_CATABOLIC_PROCESS	155	-0.349398	-1.39046	0.0288351	0.198955
GO_REGULATION_OF_ALCOHOL_BIOSYNTHETIC_PROCESS	57	-0.400829	-1.3903	0.0590717	0.198861
GO_RESPONSE_TO_FUNGUS	23	-0.496627	-1.38983	0.088748	0.199216
GO_POSITIVE_REGULATION_OF_KINASE_ACTIVITY	444	-0.315884	-1.38801	0.00423729	0.201324
GO_REGULATION_OF_KERATINOCYTE_DIFFERENTIATION	23	-0.477142	-1.38792	0.0914729	0.201158
GO_ALCOHOL_CATABOLIC_PROCESS	38	-0.433099	-1.38673	0.0787519	0.202435
GO_REGULATION_OF_T_CELL_RECEPTOR_SIGNALING_PATHWAY	28	-0.465738	-1.38631	0.0791139	0.202691
GO_SPECIFICATION_OF_ANIMAL_ORGAN_IDENTITY	24	-0.476696	-1.38619	0.0922098	0.202525
GO_INORGANIC_ION_TRANSMEMBRANE_TRANSPORT	484	-0.315599	-1.38566	0.00311526	0.202956
GO_CRANIAL_NERVE_MORPHOGENESIS	17	-0.511892	-1.38533	0.11039	0.203073
GO_ERYTHROCYTE_HOMEOSTASIS	99	-0.366505	-1.38373	0.0433673	0.204889
GO_NEGATIVE_REGULATION_OF_GTPASE_ACTIVITY	40	-0.430733	-1.38369	0.0832138	0.204633
GO_CELLULAR_COMPONENT_ASSEMBLY_INVOLVED_IN_MORPHOGENESIS	73	-0.384871	-1.3824	0.0589812	0.205995
GO_REGULATION_OF_SUPEROXIDE_METABOLIC_PROCESS	28	-0.46933	-1.38181	0.0864553	0.206498
GO_REGULATION_OF_TRANSMEMBRANE_TRANSPORT	337	-0.326761	-1.38065	0.0109409	0.207793
GO_POSITIVE_REGULATION_OF_LOCOMOTION	436	-0.319091	-1.37933	0.00732984	0.20927
GO_REGULATION_OF_WOUND_HEALING	92	-0.368316	-1.37926	0.0469543	0.209072
GO_AXON_ENSHEATHMENT_IN_CENTRAL_NERVOUS_SYSTEM	16	-0.521577	-1.37903	0.116861	0.209071
GO_TYPE_I_INTERFERON_PRODUCTION	112	-0.356776	-1.37891	0.0420918	0.208911
GO_PHOSPHOLIPID_TRANSPORT	61	-0.390945	-1.37869	0.062585	0.208899
GO_NEUROTRANSMITTER_TRANSPORT	159	-0.3421	-1.37673	0.0339977	0.211216
GO_CARDIAC_MYOFIBRIL_ASSEMBLY	17	-0.501539	-1.3749	0.122924	0.213398
GO_POSITIVE_REGULATION_OF_MICROTUBULE_POLYMERIZATION_OR_DEPOLYMERIZATION	27	-0.461527	-1.37382	0.111111	0.214601
GO_NEGATIVE_REGULATION_OF_CHROMATIN_SILENCING	15	-0.529594	-1.37297	0.111481	0.215488
GO_CELLULAR_RESPONSE_TO_VITAMIN	21	-0.49641	-1.3716	0.101142	0.217154
GO_REGULATION_OF_CYCLASE_ACTIVITY	24	-0.486853	-1.37065	0.0901771	0.218164
GO_CELLULAR_RESPONSE_TO_LIPID	436	-0.313165	-1.36919	0.00318471	0.219885
GO_ORGANIC_HYDROXY_COMPOUND_METABOLIC_PROCESS	317	-0.318164	-1.36879	0.00650759	0.220177
GO_RESPONSE_TO_OSMOTIC_STRESS	63	-0.389009	-1.36832	0.0744249	0.220495
GO_POSITIVE_REGULATION_OF_REACTIVE_OXYGEN_SPECIES_BIOSYNTHETIC_PROCESS	38	-0.425383	-1.36605	0.0832117	0.223335
GO_RESPONSE_TO_FATTY_ACID	58	-0.394638	-1.36595	0.0742779	0.223165
GO_NEGATIVE_REGULATION_OF_MYELOID_CELL_DIFFERENTIATION	72	-0.376784	-1.36567	0.0710526	0.22323
GO_PROTEIN_LOCALIZATION_TO_CELL_SURFACE	50	-0.403931	-1.36498	0.0822695	0.223858
GO_EXOCYTIC_PROCESS	66	-0.386866	-1.36388	0.0848564	0.225053
GO_VASCULAR_ENDOTHELIAL_CELL_PROLIFERATION	17	-0.513185	-1.36113	0.112878	0.228662
GO_STEROL_HOMEOSTASIS	50	-0.401047	-1.36106	0.0806676	0.228461
GO_CELLULAR_RESPONSE_TO_NITROGEN_COMPOUND	479	-0.309356	-1.35622	0.0051975	0.235197
GO_RESPONSE_TO_IRON_ION	23	-0.46696	-1.35572	0.122172	0.235593
GO_REGULATION_OF_NITRIC_OXIDE_SYNTHASE_ACTIVITY	39	-0.414272	-1.35476	0.0943396	0.236705
GO_POSITIVE_REGULATION_OF_STRIATED_MUSCLE_CELL_DIFFERENTIATION	35	-0.429208	-1.35395	0.10119	0.237545
GO_MULTICELLULAR_ORGANISMAL_RESPONSE_TO_STRESS	40	-0.41815	-1.3538	0.0980683	0.237434
GO_RECEPTOR_INTERNALIZATION	77	-0.368918	-1.35289	0.0731383	0.238486
GO_CORTICAL_CYTOSKELETON_ORGANIZATION	42	-0.414025	-1.35214	0.0987483	0.239206
GO_OLIGODENDROCYTE_DEVELOPMENT	32	-0.443352	-1.35132	0.104167	0.240067
GO_POLYOL_METABOLIC_PROCESS	56	-0.387022	-1.35072	0.0792079	0.24062
GO_POSITIVE_REGULATION_OF_DEVELOPMENTAL_GROWTH	120	-0.345162	-1.34973	0.0433121	0.241786
GO_REGULATION_OF_CARDIAC_MUSCLE_CELL_DIFFERENTIATION	29	-0.452831	-1.34933	0.0976744	0.242031
GO_L_ALPHA_AMINO_ACID_TRANSMEMBRANE_TRANSPORT	37	-0.4295	-1.34801	0.0932568	0.243678
GO_REGULATION_OF_NEURONAL_SYNAPTIC_PLASTICITY	38	-0.420279	-1.34736	0.117037	0.244341
GO_REGULATION_OF_STRESS_ACTIVATED_PROTEIN_KINASE_SIGNALING_CASCADE	189	-0.329644	-1.34724	0.0283768	0.244163
GO_NEGATIVE_REGULATION_OF_T_CELL_PROLIFERATION	40	-0.416003	-1.34621	0.0881503	0.245461
GO_POSITIVE_REGULATION_OF_ORGAN_GROWTH	40	-0.41082	-1.34547	0.0910405	0.246271
GO_REGULATION_OF_AMINO_ACID_TRANSPORT	21	-0.484191	-1.34538	0.107509	0.246064
GO_PHOSPHATIDYLCHOLINE_ACYL_CHAIN_REMODELING	15	-0.523377	-1.34479	0.143084	0.246559
GO_ANTIGEN_PROCESSING_AND_PRESENTATION_OF_PEPTIDE_OR_POLYSACCHARIDE_ANTIGEN_VIA_MHC_CLASS_II	77	-0.370176	-1.34466	0.0690571	0.246433
GO_NEGATIVE_REGULATION_OF_NF_KAPPAB_TRANSCRIPTION_FACTOR_ACTIVITY	66	-0.380501	-1.34413	0.101215	0.246911
GO_NEGATIVE_REGULATION_OF_MAP_KINASE_ACTIVITY	63	-0.380194	-1.34293	0.0918775	0.248412
GO_POSITIVE_REGULATION_OF_MONONUCLEAR_CELL_MIGRATION	19	-0.501767	-1.34185	0.134522	0.249797
GO_ORGANIC_HYDROXY_COMPOUND_CATABOLIC_PROCESS	42	-0.40773	-1.34112	0.100865	0.25061
GO_RIG_I_SIGNALING_PATHWAY	16	-0.50517	-1.34086	0.1406	0.250677
GO_REGULATION_OF_PHOSPHOLIPID_METABOLIC_PROCESS	55	-0.397305	-1.33985	0.0991254	0.251861
GO_REGULATION_OF_MACROPHAGE_DIFFERENTIATION	20	-0.480384	-1.33955	0.121643	0.251981
GO_REGULATION_OF_LYMPHOCYTE_MIGRATION	44	-0.409277	-1.33858	0.0969529	0.253167
GO_CELLULAR_RESPONSE_TO_CALCIUM_ION	59	-0.386147	-1.33844	0.0850202	0.253045
GO_RESPONSE_TO_INTERFERON_GAMMA	128	-0.340807	-1.33802	0.0592593	0.253358
GO_POSITIVE_REGULATION_OF_RECEPTOR_MEDIATED_ENDOCYTOSIS	37	-0.423024	-1.33778	0.112216	0.253373
GO_HEART_FORMATION	22	-0.48118	-1.33769	0.118012	0.253177
GO_PROTEIN_LIPID_COMPLEX_SUBUNIT_ORGANIZATION	30	-0.442513	-1.33709	0.111621	0.253805
GO_REGULATION_OF_ANDROGEN_RECEPTOR_SIGNALING_PATHWAY	23	-0.466292	-1.33402	0.136578	0.258392
GO_REGULATION_OF_TUMOR_NECROSIS_FACTOR_MEDIATED_SIGNALING_PATHWAY	48	-0.393534	-1.33306	0.077037	0.25957
GO_NEGATIVE_REGULATION_OF_PRODUCTION_OF_MOLECULAR_MEDIATOR_OF_IMMUNE_RESPONSE	24	-0.463363	-1.33264	0.126562	0.259851
GO_NEGATIVE_REGULATION_OF_ERK1_AND_ERK2_CASCADE	50	-0.398377	-1.33208	0.102158	0.260428
GO_PROSTANOID_BIOSYNTHETIC_PROCESS	20	-0.471346	-1.33153	0.120385	0.260914
GO_EPITHELIAL_STRUCTURE_MAINTENANCE	16	-0.511682	-1.33121	0.137124	0.261052
GO_REGULATION_OF_LAMELLIPODIUM_ORGANIZATION	40	-0.4135	-1.33016	0.108225	0.262375
GO_ENTRY_INTO_OTHER_ORGANISM_INVOLVED_IN_SYMBIOTIC_INTERACTION	100	-0.353722	-1.3298	0.0557668	0.262604
GO_SARCOMERE_ORGANIZATION	27	-0.448473	-1.32951	0.121212	0.262725
GO_REGULATION_OF_OXIDOREDUCTASE_ACTIVITY	76	-0.364707	-1.32879	0.0969856	0.263524
GO_ANION_TRANSPORT	376	-0.308289	-1.32864	0.0182403	0.263394
GO_REGULATION_OF_PROTEIN_SERINE_THREONINE_KINASE_ACTIVITY	414	-0.305536	-1.32787	0.0116525	0.264281
GO_MODULATION_BY_HOST_OF_VIRAL_PROCESS	18	-0.486052	-1.32787	0.152961	0.263929
GO_REGULATION_OF_LYASE_ACTIVITY	25	-0.45582	-1.32642	0.124043	0.265939
GO_REGULATION_OF_AXONOGENESIS	141	-0.335337	-1.32586	0.0589623	0.266481
GO_DEFENSE_RESPONSE_TO_VIRUS	161	-0.330876	-1.32437	0.0531915	0.268493
GO_HEAT_GENERATION	15	-0.510138	-1.32267	0.143573	0.270886
GO_POSITIVE_REGULATION_OF_RESPONSE_TO_BIOTIC_STIMULUS	31	-0.439939	-1.32035	0.121951	0.274377
GO_NEGATIVE_REGULATION_OF_TOR_SIGNALING	39	-0.412003	-1.31947	0.133523	0.275486
GO_PHENOL_CONTAINING_COMPOUND_METABOLIC_PROCESS	28	-0.441596	-1.31941	0.138889	0.275247
GO_POSITIVE_REGULATION_OF_I_KAPPAB_KINASE_NF_KAPPAB_SIGNALING	150	-0.333655	-1.31938	0.0547786	0.274943
GO_REGULATION_OF_MACROPHAGE_DERIVED_FOAM_CELL_DIFFERENTIATION	20	-0.471722	-1.31808	0.128874	0.276691
GO_CELLULAR_RESPONSE_TO_PEPTIDE	289	-0.310897	-1.31797	0.0238095	0.276518
GO_FATTY_ACID_TRANSPORT	60	-0.376774	-1.31792	0.112202	0.276223
GO_POSITIVE_REGULATION_OF_STEROID_METABOLIC_PROCESS	17	-0.497865	-1.31733	0.143092	0.276802
GO_MEMBRANE_DEPOLARIZATION_DURING_CARDIAC_MUSCLE_CELL_ACTION_POTENTIAL	19	-0.490389	-1.31696	0.123418	0.277013
GO_GLUTATHIONE_DERIVATIVE_BIOSYNTHETIC_PROCESS	17	-0.486042	-1.31622	0.145396	0.277942
GO_TRANSMISSION_OF_NERVE_IMPULSE	28	-0.437746	-1.31525	0.133627	0.279165
GO_POSITIVE_REGULATION_OF_NEURAL_PRECURSOR_CELL_PROLIFERATION	32	-0.4274	-1.31465	0.117391	0.279797
GO_POSITIVE_REGULATION_OF_STEM_CELL_PROLIFERATION	28	-0.442378	-1.31388	0.128012	0.280725
GO_NEGATIVE_REGULATION_OF_CELL_JUNCTION_ASSEMBLY	22	-0.464112	-1.31377	0.138846	0.28052
GO_REGULATION_OF_CELLULAR_EXTRAVASATION	20	-0.464262	-1.31335	0.146646	0.280876
GO_RESPONSE_TO_ZINC_ION	28	-0.440322	-1.31258	0.137371	0.281813
GO_REGULATION_OF_TRANSCRIPTION_BY_RNA_POLYMERASE_III	19	-0.477223	-1.31232	0.14958	0.281863
GO_RESPONSE_TO_INTERLEUKIN_4	30	-0.435106	-1.31158	0.133846	0.282736
GO_POSITIVE_REGULATION_OF_B_CELL_MEDIATED_IMMUNITY	24	-0.456162	-1.31096	0.149059	0.28342
GO_AMINOGLYCAN_CATABOLIC_PROCESS	48	-0.392811	-1.3092	0.106892	0.28604
GO_ORGANOPHOSPHATE_ESTER_TRANSPORT	80	-0.361356	-1.30892	0.0977242	0.286111
GO_REGULATION_OF_PROTEIN_OLIGOMERIZATION	30	-0.426696	-1.30777	0.132219	0.287724
GO_ACETYL_COA_BIOSYNTHETIC_PROCESS	20	-0.464888	-1.30431	0.166149	0.293374
GO_NEURON_DEATH	264	-0.308976	-1.3041	0.0391061	0.293401
GO_REGULATION_OF_ACTIN_NUCLEATION	26	-0.440309	-1.30284	0.151235	0.295244
GO_LIPOPROTEIN_BIOSYNTHETIC_PROCESS	81	-0.35617	-1.30272	0.0961792	0.295077
GO_PROTEIN_KINASE_C_ACTIVATING_G_PROTEIN_COUPLED_RECEPTOR_SIGNALING_PATHWAY	18	-0.477831	-1.3027	0.161031	0.294739
GO_REGULATION_OF_RESPONSE_TO_CYTOKINE_STIMULUS	139	-0.327899	-1.302	0.0677146	0.295644
GO_REGULATION_OF_SYNAPTIC_PLASTICITY	123	-0.3365	-1.30182	0.0725907	0.295592
GO_MRNA_MODIFICATION	19	-0.474168	-1.29995	0.176948	0.298501
GO_REGULATION_OF_CELL_MORPHOGENESIS	374	-0.301083	-1.29985	0.0226782	0.29827
GO_CELLULAR_RESPONSE_TO_LOW_DENSITY_LIPOPROTEIN_PARTICLE_STIMULUS	16	-0.503088	-1.29981	0.129353	0.29797
GO_RNA_STABILIZATION	36	-0.413397	-1.29874	0.139912	0.299502
GO_NEGATIVE_REGULATION_OF_COLD_INDUCED_THERMOGENESIS	41	-0.394035	-1.29769	0.135174	0.301078
GO_PHOSPHATIDYLINOSITOL_PHOSPHORYLATION	43	-0.397671	-1.29731	0.112696	0.301403
GO_NEGATIVE_REGULATION_OF_SYNAPSE_ORGANIZATION	15	-0.499702	-1.29535	0.168595	0.304559
GO_POSITIVE_REGULATION_OF_VASCULATURE_DEVELOPMENT	157	-0.320409	-1.29526	0.0672963	0.304327
GO_MONOCARBOXYLIC_ACID_BIOSYNTHETIC_PROCESS	130	-0.329811	-1.29512	0.0802395	0.304188
GO_GLUTAMATE_SECRETION	23	-0.452927	-1.29503	0.164634	0.303976
GO_REGULATION_OF_MONOOXYGENASE_ACTIVITY	46	-0.391221	-1.29474	0.112022	0.304075
GO_MUSCLE_HYPERTROPHY	70	-0.360045	-1.29377	0.126214	0.305432
GO_POSITIVE_REGULATION_OF_SYNAPTIC_TRANSMISSION	102	-0.342296	-1.29367	0.102628	0.305206
GO_REGULATION_OF_CHROMATIN_SILENCING	27	-0.429308	-1.29287	0.146154	0.306246
GO_AMMONIUM_ION_METABOLIC_PROCESS	37	-0.409351	-1.29211	0.14978	0.307241
GO_NEGATIVE_REGULATION_OF_NEURON_DEATH	151	-0.327097	-1.29195	0.077374	0.307123
GO_REGULATION_OF_LIPID_CATABOLIC_PROCESS	38	-0.405486	-1.29135	0.125176	0.307813
GO_NEGATIVE_REGULATION_OF_EPITHELIAL_CELL_MIGRATION	54	-0.379787	-1.29124	0.122476	0.307612
GO_POSITIVE_REGULATION_OF_PHOSPHATASE_ACTIVITY	28	-0.430567	-1.29072	0.163389	0.308124
GO_POSITIVE_REGULATION_OF_SMALL_MOLECULE_METABOLIC_PROCESS	73	-0.355548	-1.2902	0.103493	0.308663
GO_PERIPHERAL_NERVOUS_SYSTEM_DEVELOPMENT	54	-0.370188	-1.28883	0.127049	0.310798
GO_VASODILATION	23	-0.452513	-1.28866	0.166667	0.310718
GO_OVARIAN_FOLLICLE_DEVELOPMENT	41	-0.395285	-1.28857	0.145863	0.310498
GO_POSITIVE_REGULATION_OF_DNA_BINDING_TRANSCRIPTION_FACTOR_ACTIVITY	211	-0.307629	-1.28734	0.0396825	0.312378
GO_CELLULAR_MONOVALENT_INORGANIC_CATION_HOMEOSTASIS	79	-0.352905	-1.28705	0.112772	0.312481
GO_REGULATION_OF_LAMELLIPODIUM_ASSEMBLY	28	-0.426904	-1.28669	0.156773	0.31274
GO_PHOSPHATIDYLINOSITOL_DEPHOSPHORYLATION	21	-0.455541	-1.28651	0.154472	0.312714
GO_STRESS_ACTIVATED_PROTEIN_KINASE_SIGNALING_CASCADE	254	-0.307754	-1.28597	0.0521064	0.31335
GO_MITOCHONDRION_MORPHOGENESIS	20	-0.468149	-1.28595	0.182109	0.31299
GO_ARTERY_DEVELOPMENT	70	-0.360933	-1.28567	0.119382	0.313129
GO_CELLULAR_RESPONSE_TO_AMMONIUM_ION	39	-0.394572	-1.28562	0.137519	0.312836
GO_BILE_ACID_METABOLIC_PROCESS	27	-0.433111	-1.28514	0.174184	0.313331
GO_REGULATION_OF_DNA_BINDING_TRANSCRIPTION_FACTOR_ACTIVITY	335	-0.298679	-1.28503	0.0351438	0.313125
GO_NEURON_MATURATION	33	-0.423357	-1.28501	0.153139	0.312788
GO_NEGATIVE_REGULATION_OF_RESPONSE_TO_WOUNDING	56	-0.373151	-1.28481	0.128571	0.312772
GO_COLLATERAL_SPROUTING	19	-0.460326	-1.2846	0.1625	0.312763
GO_REGULATION_OF_MUSCLE_CELL_DIFFERENTIATION	114	-0.331197	-1.28423	0.100372	0.313046
GO_ADENYLATE_CYCLASE_INHIBITING_G_PROTEIN_COUPLED_RECEPTOR_SIGNALING_PATHWAY	39	-0.398905	-1.28409	0.145038	0.312918
GO_NEUROMUSCULAR_PROCESS_CONTROLLING_BALANCE	34	-0.411995	-1.28356	0.149847	0.313487
GO_NEGATIVE_REGULATION_OF_I_KAPPAB_KINASE_NF_KAPPAB_SIGNALING	35	-0.404581	-1.28121	0.145401	0.31743
GO_MEMBRANE_PROTEIN_ECTODOMAIN_PROTEOLYSIS	38	-0.395553	-1.28077	0.145401	0.317842
GO_MULTI_ORGANISM_CELLULAR_PROCESS	36	-0.407982	-1.28053	0.151424	0.317918
GO_INORGANIC_ION_IMPORT_ACROSS_PLASMA_MEMBRANE	50	-0.380516	-1.27986	0.128809	0.318816
GO_PROTEIN_TARGETING_TO_LYSOSOME	19	-0.456052	-1.27894	0.186901	0.320042
GO_REGULATION_OF_RESPONSE_TO_WOUNDING	113	-0.335241	-1.27831	0.0981132	0.320877
GO_REGULATION_OF_CATION_TRANSMEMBRANE_TRANSPORT	209	-0.307804	-1.27781	0.078341	0.321449
GO_NEGATIVE_REGULATION_OF_PROTEIN_LOCALIZATION_TO_CELL_PERIPHERY	20	-0.454184	-1.27664	0.177642	0.323285
GO_POSITIVE_REGULATION_OF_MUSCLE_CELL_DIFFERENTIATION	61	-0.362031	-1.27664	0.125352	0.322902
GO_NEGATIVE_REGULATION_OF_ADHERENS_JUNCTION_ORGANIZATION	18	-0.480455	-1.27578	0.173502	0.324045
GO_VIRAL_RNA_GENOME_REPLICATION	20	-0.462362	-1.27544	0.182708	0.32425
GO_REGULATION_OF_CELL_SIZE	144	-0.31943	-1.27378	0.078853	0.327016
GO_PEPTIDYL_TYROSINE_AUTOPHOSPHORYLATION	31	-0.416291	-1.27336	0.150155	0.327418
GO_DNA_DEALKYLATION	21	-0.450755	-1.27329	0.185759	0.327132
GO_REGULATION_OF_T_CELL_MIGRATION	32	-0.419072	-1.27328	0.157895	0.326766
GO_POSITIVE_REGULATION_OF_CILIUM_ASSEMBLY	19	-0.470497	-1.2712	0.189474	0.330332
GO_REGULATION_OF_RUFFLE_ASSEMBLY	23	-0.434777	-1.26977	0.193146	0.332728
GO_POSITIVE_REGULATION_OF_CARBOHYDRATE_METABOLIC_PROCESS	47	-0.379074	-1.26965	0.159026	0.332557
GO_SODIUM_ION_TRANSPORT	129	-0.32664	-1.26926	0.0926829	0.332829
GO_NEGATIVE_REGULATION_OF_SMOOTH_MUSCLE_CELL_PROLIFERATION	37	-0.400469	-1.26898	0.15208	0.332978
GO_RAC_PROTEIN_SIGNAL_TRANSDUCTION	32	-0.408202	-1.26891	0.158358	0.332735
GO_POSITIVE_REGULATION_OF_RELEASE_OF_SEQUESTERED_CALCIUM_ION_INTO_CYTOSOL	25	-0.42906	-1.26814	0.169231	0.333826
GO_DRUG_TRANSMEMBRANE_TRANSPORT	58	-0.365812	-1.26757	0.143054	0.334514
GO_AORTA_MORPHOGENESIS	23	-0.44309	-1.26737	0.181364	0.334518
GO_NEGATIVE_REGULATION_OF_ESTABLISHMENT_OF_PROTEIN_LOCALIZATION	132	-0.320749	-1.26684	0.0886699	0.335153
GO_REGULATION_OF_PROTEIN_HOMODIMERIZATION_ACTIVITY	21	-0.455467	-1.2665	0.182274	0.335409
GO_PEPTIDYL_LYSINE_TRIMETHYLATION	39	-0.391909	-1.26638	0.146269	0.335277
GO_MONOVALENT_INORGANIC_CATION_TRANSPORT	295	-0.296562	-1.26626	0.0516484	0.33511
GO_PROTEIN_AUTOPHOSPHORYLATION	203	-0.308473	-1.26596	0.0789474	0.335285
GO_LONG_CHAIN_FATTY_ACID_TRANSPORT	41	-0.386375	-1.26462	0.169054	0.337415
GO_RESPONSE_TO_CALCIUM_ION	104	-0.333828	-1.26385	0.106383	0.338527
GO_POSITIVE_REGULATION_OF_SUPRAMOLECULAR_FIBER_ORGANIZATION	166	-0.316816	-1.26292	0.0906977	0.339918
GO_REGULATION_OF_LIPOPOLYSACCHARIDE_MEDIATED_SIGNALING_PATHWAY	17	-0.469206	-1.2624	0.180952	0.340495
GO_CELL_VOLUME_HOMEOSTASIS	27	-0.4271	-1.26165	0.175758	0.341569
GO_NEGATIVE_REGULATION_OF_CHROMATIN_ORGANIZATION	49	-0.371747	-1.26162	0.142857	0.341231
GO_SECRETION_BY_TISSUE	23	-0.44051	-1.26045	0.18442	0.343154
GO_RECEPTOR_METABOLIC_PROCESS	144	-0.317309	-1.2569	0.103695	0.349742
GO_NEURONAL_ACTION_POTENTIAL	15	-0.489864	-1.25668	0.195616	0.349779
GO_HEART_GROWTH	69	-0.348273	-1.25618	0.130919	0.350357
GO_FILOPODIUM_ASSEMBLY	48	-0.370635	-1.25417	0.156559	0.353886
GO_ALCOHOL_BIOSYNTHETIC_PROCESS	127	-0.324084	-1.25381	0.0997567	0.354192
GO_NEGATIVE_REGULATION_OF_T_CELL_DIFFERENTIATION	31	-0.41352	-1.25324	0.191045	0.354931
GO_CELL_FATE_DETERMINATION	21	-0.445999	-1.25304	0.201258	0.35491
GO_RESPONSE_TO_ALCOHOL	169	-0.311785	-1.25227	0.0894988	0.356032
GO_REGULATION_OF_ENDOTHELIAL_CELL_DIFFERENTIATION	27	-0.41633	-1.24891	0.169255	0.362488
GO_RENAL_FILTRATION	16	-0.480164	-1.24872	0.196399	0.362433
GO_AUTOPHAGOSOME_MATURATION	33	-0.401483	-1.24862	0.194662	0.362232
GO_REGULATION_OF_FATTY_ACID_BETA_OXIDATION	16	-0.474244	-1.24829	0.20202	0.362479
GO_POSITIVE_REGULATION_OF_AXONOGENESIS	67	-0.348024	-1.24801	0.157895	0.36261
GO_ACTIN_FILAMENT_ORGANIZATION	321	-0.291422	-1.24748	0.055914	0.363249
GO_PHAGOSOME_ACIDIFICATION	21	-0.443132	-1.24669	0.194444	0.364329
GO_REGULATION_OF_CELL_PROJECTION_ASSEMBLY	136	-0.314731	-1.2462	0.112306	0.364861
GO_ENDOCARDIAL_CUSHION_MORPHOGENESIS	29	-0.409551	-1.24566	0.194864	0.365542
GO_ANTIGEN_PROCESSING_AND_PRESENTATION_OF_PEPTIDE_ANTIGEN	147	-0.313836	-1.2454	0.115108	0.365658
GO_NUCLEOBASE_CONTAINING_SMALL_MOLECULE_CATABOLIC_PROCESS	28	-0.415864	-1.24496	0.203101	0.366137
GO_NEGATIVE_REGULATION_OF_CHEMOTAXIS	45	-0.374165	-1.24487	0.171554	0.365902
GO_NEGATIVE_REGULATION_OF_TRANSPORT	332	-0.290619	-1.24137	0.0549569	0.372824
GO_POSITIVE_REGULATION_OF_ESTABLISHMENT_OF_PROTEIN_LOCALIZATION	336	-0.286408	-1.24091	0.0534759	0.373304
GO_FATTY_ACID_BIOSYNTHETIC_PROCESS	102	-0.325467	-1.24017	0.136422	0.374435
GO_VESICLE_CYTOSKELETAL_TRAFFICKING	47	-0.369344	-1.23784	0.165468	0.378764
GO_REGULATION_OF_NEUROTRANSMITTER_LEVELS	214	-0.298636	-1.23761	0.0905963	0.378777
GO_RESPONSE_TO_ANGIOTENSIN	19	-0.449697	-1.23641	0.204651	0.38086
GO_NEURON_APOPTOTIC_PROCESS	183	-0.302994	-1.23573	0.10496	0.381738
GO_POSITIVE_REGULATION_OF_NEUROBLAST_PROLIFERATION	15	-0.47839	-1.23552	0.204878	0.381748
GO_REGULATION_OF_T_CELL_DIFFERENTIATION_IN_THYMUS	19	-0.453385	-1.23388	0.206785	0.38486
GO_CYTOPLASMIC_MICROTUBULE_ORGANIZATION	46	-0.368877	-1.23373	0.170274	0.384745
GO_ATRIAL_SEPTUM_DEVELOPMENT	16	-0.474117	-1.2331	0.211538	0.385628
GO_NEGATIVE_REGULATION_OF_CELLULAR_RESPONSE_TO_TRANSFORMING_GROWTH_FACTOR_BETA_STIMULUS	64	-0.350343	-1.23291	0.162347	0.385563
GO_RESPONSE_TO_INTERLEUKIN_6	25	-0.427618	-1.23266	0.196429	0.385643
GO_POSITIVE_REGULATION_OF_CYTOKINE_PRODUCTION_INVOLVED_IN_IMMUNE_RESPONSE	40	-0.384307	-1.2315	0.174603	0.387715
GO_POSITIVE_REGULATION_OF_ORGANELLE_ASSEMBLY	58	-0.35686	-1.2308	0.171348	0.388691
GO_LOW_DENSITY_LIPOPROTEIN_RECEPTOR_PARTICLE_METABOLIC_PROCESS	19	-0.441076	-1.23043	0.235195	0.389058
GO_PHOSPHOLIPID_CATABOLIC_PROCESS	27	-0.415656	-1.23024	0.210111	0.389007
GO_PTERIDINE_CONTAINING_COMPOUND_METABOLIC_PROCESS	24	-0.419445	-1.22967	0.189231	0.389676
GO_DOPAMINE_RECEPTOR_SIGNALING_PATHWAY	29	-0.405019	-1.22936	0.204204	0.389882
GO_CELLULAR_RESPONSE_TO_AMINO_ACID_STIMULUS	56	-0.359572	-1.22784	0.175034	0.39267
GO_POSITIVE_REGULATION_OF_VASCULAR_ASSOCIATED_SMOOTH_MUSCLE_CELL_MIGRATION	16	-0.472591	-1.2274	0.229097	0.393194
GO_ANION_TRANSMEMBRANE_TRANSPORT	184	-0.298499	-1.22734	0.0971429	0.392849
GO_MYOFIBRIL_ASSEMBLY	41	-0.376916	-1.22718	0.196375	0.392762
GO_REGULATION_OF_VESICLE_FUSION	22	-0.432158	-1.22684	0.206573	0.393019
GO_APOPTOTIC_CELL_CLEARANCE	36	-0.387961	-1.22591	0.194611	0.394564
GO_CELL_MATURATION	105	-0.325722	-1.22587	0.137532	0.3942
GO_SELECTIVE_AUTOPHAGY	42	-0.375621	-1.22522	0.186536	0.395193
GO_MYOBLAST_DIFFERENTIATION	61	-0.352494	-1.22497	0.183217	0.395267
GO_REGULATION_OF_T_CELL_APOPTOTIC_PROCESS	24	-0.417076	-1.22487	0.2125	0.395026
GO_NEGATIVE_REGULATION_OF_MUSCLE_CONTRACTION	22	-0.428533	-1.22436	0.222741	0.395671
GO_REGULATION_OF_EPITHELIAL_CELL_MIGRATION	189	-0.300629	-1.22278	0.109966	0.398521
GO_IRON_SULFUR_CLUSTER_ASSEMBLY	18	-0.456543	-1.22251	0.221691	0.398628
GO_SULFUR_COMPOUND_CATABOLIC_PROCESS	36	-0.381494	-1.22244	0.188988	0.398348
GO_NEGATIVE_REGULATION_OF_MAPK_CASCADE	133	-0.309444	-1.22181	0.145754	0.399306
GO_DIGESTIVE_SYSTEM_PROCESS	49	-0.360261	-1.22115	0.173601	0.400267
GO_REGULATION_OF_VASCULATURE_DEVELOPMENT	263	-0.290321	-1.22047	0.0932584	0.401319
GO_POSITIVE_REGULATION_OF_SKELETAL_MUSCLE_TISSUE_DEVELOPMENT	16	-0.458068	-1.21914	0.210265	0.403692
GO_FEMALE_GENITALIA_DEVELOPMENT	15	-0.487281	-1.21718	0.240924	0.407567
GO_AMINO_ACID_TRANSMEMBRANE_TRANSPORT	59	-0.351887	-1.21526	0.167341	0.411323
GO_NEGATIVE_REGULATION_OF_VASCULAR_SMOOTH_MUSCLE_CELL_PROLIFERATION	15	-0.463442	-1.2146	0.234921	0.412379
GO_HETEROTYPIC_CELL_CELL_ADHESION	45	-0.370354	-1.21425	0.195862	0.412654
GO_CELLULAR_RESPONSE_TO_KETONE	76	-0.336213	-1.21397	0.17139	0.412853
GO_ORGANIC_HYDROXY_COMPOUND_BIOSYNTHETIC_PROCESS	174	-0.299385	-1.21153	0.12691	0.417775
GO_CYTOKINE_SECRETION_INVOLVED_IN_IMMUNE_RESPONSE	15	-0.471019	-1.21128	0.218241	0.417883
GO_REGULATION_OF_ACTOMYOSIN_STRUCTURE_ORGANIZATION	77	-0.332023	-1.21038	0.178763	0.419443
GO_GLYCOLIPID_BIOSYNTHETIC_PROCESS	53	-0.353577	-1.20975	0.193277	0.420364
GO_POSITIVE_REGULATION_OF_NITRIC_OXIDE_BIOSYNTHETIC_PROCESS	32	-0.389056	-1.20888	0.199681	0.421865
GO_NEGATIVE_REGULATION_OF_INTERFERON_GAMMA_PRODUCTION	25	-0.420675	-1.20806	0.232339	0.423255
GO_PHOSPHATIDYLCHOLINE_METABOLIC_PROCESS	22	-0.428389	-1.20681	0.228748	0.425669
GO_GLYCEROLIPID_BIOSYNTHETIC_PROCESS	188	-0.294373	-1.20668	0.128621	0.425544
GO_NEUROMUSCULAR_PROCESS	63	-0.342686	-1.20609	0.188446	0.426375
GO_MEMBRANE_LIPID_CATABOLIC_PROCESS	27	-0.401442	-1.20589	0.215289	0.426348
GO_STEROID_METABOLIC_PROCESS	191	-0.295957	-1.20551	0.135632	0.426767
GO_NEGATIVE_REGULATION_OF_INTRINSIC_APOPTOTIC_SIGNALING_PATHWAY_BY_P53_CLASS_MEDIATOR	16	-0.460075	-1.20487	0.239414	0.42771
GO_ENDOCARDIAL_CUSHION_FORMATION	19	-0.439749	-1.20458	0.234177	0.4279
GO_NEGATIVE_REGULATION_OF_DEPHOSPHORYLATION	83	-0.32673	-1.20382	0.176923	0.429146
GO_NEGATIVE_REGULATION_OF_TYPE_I_INTERFERON_PRODUCTION	39	-0.374527	-1.20356	0.211063	0.429267
GO_CARDIAC_MUSCLE_TISSUE_MORPHOGENESIS	44	-0.370412	-1.2029	0.213793	0.43026
GO_NEGATIVE_REGULATION_OF_LYMPHOCYTE_DIFFERENTIATION	38	-0.369667	-1.20198	0.236882	0.431884
GO_COLLAGEN_METABOLIC_PROCESS	16	-0.455685	-1.20182	0.235099	0.431729
GO_CELLULAR_RESPONSE_TO_ACID_CHEMICAL	155	-0.29708	-1.20166	0.14012	0.431644
GO_PHOSPHOLIPID_DEPHOSPHORYLATION	29	-0.39152	-1.20067	0.231008	0.433403
GO_REGULATION_OF_LONG_TERM_NEURONAL_SYNAPTIC_PLASTICITY	20	-0.432604	-1.20066	0.223926	0.432953
GO_POSITIVE_REGULATION_OF_CATION_CHANNEL_ACTIVITY	39	-0.379738	-1.20027	0.21563	0.433367
GO_LYSOSOMAL_TRANSPORT	90	-0.321041	-1.19933	0.186486	0.434946
GO_POSITIVE_REGULATION_OF_SUBSTRATE_ADHESION_DEPENDENT_CELL_SPREADING	29	-0.393687	-1.19881	0.241935	0.435705
GO_POSITIVE_REGULATION_OF_MONOOXYGENASE_ACTIVITY	24	-0.416447	-1.19839	0.254211	0.436223
GO_GLIAL_CELL_DIFFERENTIATION	151	-0.296721	-1.19818	0.14554	0.436206
GO_REGULATION_OF_ESTABLISHMENT_OR_MAINTENANCE_OF_CELL_POLARITY	23	-0.42027	-1.19784	0.243631	0.436548
GO_NEGATIVE_REGULATION_OF_SMALL_GTPASE_MEDIATED_SIGNAL_TRANSDUCTION	48	-0.355809	-1.19733	0.212034	0.437245
GO_MEMBRANE_PROTEIN_INTRACELLULAR_DOMAIN_PROTEOLYSIS	18	-0.448361	-1.19723	0.247678	0.437017
GO_PLASMA_MEMBRANE_ORGANIZATION	75	-0.329785	-1.19625	0.191117	0.438778
GO_REGULATION_OF_MYOTUBE_DIFFERENTIATION	34	-0.376406	-1.19621	0.193893	0.438418
GO_LIPID_BIOSYNTHETIC_PROCESS	498	-0.270992	-1.196	0.0881743	0.43843
GO_SMOOTH_MUSCLE_CELL_PROLIFERATION	114	-0.309798	-1.19585	0.17764	0.438319
GO_NEGATIVE_REGULATION_OF_KINASE_ACTIVITY	213	-0.288962	-1.1956	0.159221	0.438415
GO_RESPONSE_TO_PEPTIDE	377	-0.277436	-1.19546	0.0946808	0.438258
GO_POSITIVE_REGULATION_OF_GLYCOLYTIC_PROCESS	15	-0.460502	-1.19514	0.247541	0.438541
GO_FOLIC_ACID_METABOLIC_PROCESS	18	-0.44109	-1.1934	0.258621	0.442039
GO_LIPID_HOMEOSTASIS	89	-0.323841	-1.19274	0.193758	0.443071
GO_T_CELL_APOPTOTIC_PROCESS	35	-0.384598	-1.19223	0.235921	0.443777
GO_IMPORT_ACROSS_PLASMA_MEMBRANE	74	-0.328199	-1.19148	0.208995	0.445031
GO_MICROTUBULE_NUCLEATION	25	-0.407387	-1.19068	0.232489	0.446387
GO_BLOOD_VESSEL_MORPHOGENESIS	478	-0.271026	-1.1906	0.0896767	0.446124
GO_T_HELPER_1_CELL_DIFFERENTIATION	15	-0.453521	-1.19028	0.247906	0.446344
GO_WNT_SIGNALING_PATHWAY_CALCIUM_MODULATING_PATHWAY	33	-0.375607	-1.18932	0.217325	0.448142
GO_THYMIC_T_CELL_SELECTION	15	-0.456051	-1.18901	0.256667	0.448379
GO_REGULATION_OF_EPIDERMAL_CELL_DIFFERENTIATION	37	-0.372502	-1.18814	0.240658	0.449956
GO_COGNITION	184	-0.292755	-1.18785	0.158768	0.450162
GO_REGULATION_OF_BONE_MINERALIZATION	52	-0.346381	-1.18783	0.230453	0.449721
GO_MUSCLE_CELL_DEVELOPMENT	122	-0.305211	-1.18778	0.174447	0.449359
GO_BILE_ACID_BIOSYNTHETIC_PROCESS	21	-0.423929	-1.18766	0.245192	0.449168
GO_CELLULAR_COMPONENT_MAINTENANCE	44	-0.363207	-1.18747	0.223011	0.449132
GO_INTRACELLULAR_STEROL_TRANSPORT	17	-0.446933	-1.1874	0.257143	0.448818
GO_SENSORY_PERCEPTION_OF_PAIN	50	-0.34915	-1.18646	0.19437	0.450424
GO_PHOSPHOLIPID_BIOSYNTHETIC_PROCESS	201	-0.289491	-1.18608	0.141563	0.450846
GO_HISTONE_H3_K4_TRIMETHYLATION	15	-0.463774	-1.18517	0.253311	0.45244
GO_POSITIVE_REGULATION_OF_NITRIC_OXIDE_SYNTHASE_ACTIVITY	19	-0.429606	-1.1843	0.252396	0.454035
GO_AORTA_DEVELOPMENT	43	-0.360253	-1.18325	0.228448	0.456044
GO_POSITIVE_REGULATION_OF_ACTIN_NUCLEATION	16	-0.448703	-1.18304	0.272152	0.456031
GO_NEGATIVE_REGULATION_OF_LIPID_METABOLIC_PROCESS	51	-0.34638	-1.18184	0.214774	0.45831
GO_ARF_PROTEIN_SIGNAL_TRANSDUCTION	17	-0.448185	-1.18116	0.248288	0.459448
GO_MYOTUBE_CELL_DEVELOPMENT	20	-0.422933	-1.18057	0.244275	0.460368
GO_BODY_MORPHOGENESIS	39	-0.362647	-1.18018	0.207194	0.460785
GO_B_CELL_APOPTOTIC_PROCESS	23	-0.413722	-1.17998	0.264297	0.460748
GO_MUSCLE_ADAPTATION	84	-0.319325	-1.17941	0.225032	0.461628
GO_NEGATIVE_REGULATION_OF_RNA_CATABOLIC_PROCESS	45	-0.359291	-1.17907	0.253644	0.461928
GO_HEMATOPOIETIC_PROGENITOR_CELL_DIFFERENTIATION	138	-0.297779	-1.17903	0.167651	0.461533
GO_AMINE_TRANSPORT	45	-0.359262	-1.17787	0.23338	0.463734
GO_CENTRAL_NERVOUS_SYSTEM_PROJECTION_NEURON_AXONOGENESIS	20	-0.43121	-1.17759	0.259442	0.463909
GO_RESPONSE_TO_AXON_INJURY	53	-0.347839	-1.17745	0.23431	0.463756
GO_REGULATION_OF_STEM_CELL_POPULATION_MAINTENANCE	17	-0.444904	-1.17685	0.242017	0.464636
GO_ARACHIDONIC_ACID_METABOLIC_PROCESS	24	-0.399737	-1.17652	0.239819	0.464934
GO_POSITIVE_REGULATION_OF_LAMELLIPODIUM_ORGANIZATION	24	-0.411455	-1.17635	0.260802	0.464859
GO_REGULATION_OF_RECEPTOR_LOCALIZATION_TO_SYNAPSE	16	-0.452944	-1.17614	0.27381	0.464817
GO_NITRIC_OXIDE_BIOSYNTHETIC_PROCESS	58	-0.343288	-1.17592	0.208044	0.464889
GO_REGULATION_OF_ENDOTHELIAL_CELL_MIGRATION	137	-0.29554	-1.17463	0.187426	0.467407
GO_POSITIVE_REGULATION_OF_CARDIAC_MUSCLE_CELL_PROLIFERATION	22	-0.42304	-1.17453	0.267742	0.467182
GO_NEGATIVE_REGULATION_OF_NIK_NF_KAPPAB_SIGNALING	17	-0.441354	-1.17367	0.271845	0.468723
GO_POSITIVE_REGULATION_OF_RESPONSE_TO_WOUNDING	43	-0.359536	-1.17324	0.237216	0.46922
GO_IRON_ION_TRANSPORT	59	-0.339228	-1.17236	0.235526	0.47081
GO_GLYCOSYL_COMPOUND_CATABOLIC_PROCESS	22	-0.406074	-1.17215	0.25966	0.470892
GO_INTRACELLULAR_LIPID_TRANSPORT	32	-0.383047	-1.17199	0.244083	0.470804
GO_REGULATION_OF_CELLULAR_COMPONENT_SIZE	295	-0.274917	-1.17169	0.146667	0.471007
GO_BEHAVIOR	353	-0.274353	-1.17103	0.11879	0.472136
GO_BONE_DEVELOPMENT	167	-0.290273	-1.17083	0.158637	0.47212
GO_ANTIBIOTIC_METABOLIC_PROCESS	47	-0.351407	-1.16892	0.237584	0.47611
GO_POTASSIUM_ION_IMPORT_ACROSS_PLASMA_MEMBRANE	26	-0.390921	-1.16742	0.25268	0.479216
GO_METHYLATION_DEPENDENT_CHROMATIN_SILENCING	15	-0.447032	-1.16716	0.277419	0.479336
GO_REGULATION_OF_SUPRAMOLECULAR_FIBER_ORGANIZATION	278	-0.276183	-1.16612	0.141125	0.481369
GO_CERAMIDE_BIOSYNTHETIC_PROCESS	46	-0.347417	-1.16598	0.236953	0.481197
GO_POSITIVE_REGULATION_OF_ERYTHROCYTE_DIFFERENTIATION	26	-0.398847	-1.1648	0.277429	0.483549
GO_MRNA_TRANSCRIPTION_BY_RNA_POLYMERASE_II	15	-0.450129	-1.16441	0.296684	0.484021
GO_POSITIVE_REGULATION_OF_P38MAPK_CASCADE	24	-0.396003	-1.16414	0.237049	0.484167
GO_PEROXISOMAL_MEMBRANE_TRANSPORT	17	-0.432301	-1.1639	0.260731	0.484317
GO_REGULATION_OF_MEMBRANE_LIPID_DISTRIBUTION	34	-0.366547	-1.16318	0.272308	0.485576
GO_ACTOMYOSIN_STRUCTURE_ORGANIZATION	150	-0.292372	-1.1628	0.192841	0.485981
GO_REGULATION_OF_FATTY_ACID_OXIDATION	26	-0.385616	-1.162	0.244168	0.487379
GO_POSITIVE_REGULATION_OF_OXIDOREDUCTASE_ACTIVITY	45	-0.351888	-1.1601	0.244868	0.491371
GO_SYNAPTIC_VESICLE_RECYCLING	49	-0.353288	-1.15995	0.25641	0.491236
GO_CARBOHYDRATE_DERIVATIVE_CATABOLIC_PROCESS	135	-0.292325	-1.15962	0.20698	0.49151
GO_REGULATION_OF_LIPID_STORAGE	35	-0.368706	-1.15898	0.256484	0.492619
GO_CELLULAR_RESPONSE_TO_INORGANIC_SUBSTANCE	154	-0.294003	-1.15865	0.205596	0.492924
GO_LOCALIZATION_WITHIN_MEMBRANE	112	-0.302302	-1.15768	0.212235	0.494657
GO_REGULATION_OF_LIPID_METABOLIC_PROCESS	298	-0.272017	-1.15682	0.141758	0.496213
GO_POSITIVE_REGULATION_OF_CYTOSKELETON_ORGANIZATION	183	-0.28395	-1.15593	0.199079	0.497908
GO_CELLULAR_RESPONSE_TO_DRUG	271	-0.272665	-1.1557	0.156044	0.497986
GO_ASTROCYTE_DIFFERENTIATION	53	-0.339052	-1.1555	0.259943	0.49795
GO_REGULATION_OF_BIOMINERAL_TISSUE_DEVELOPMENT	62	-0.325121	-1.15434	0.250338	0.500285
GO_REGULATION_OF_HISTONE_H3_K9_METHYLATION	18	-0.420863	-1.15386	0.297508	0.50098
GO_POSITIVE_REGULATION_OF_CELL_DEVELOPMENT	387	-0.266944	-1.15335	0.150802	0.501783
GO_ACTIN_POLYMERIZATION_OR_DEPOLYMERIZATION	166	-0.285542	-1.15252	0.19881	0.503272
GO_CELL_RECOGNITION	82	-0.312046	-1.15157	0.226365	0.505073
GO_POSITIVE_REGULATION_OF_CARDIOCYTE_DIFFERENTIATION	22	-0.409564	-1.15132	0.291541	0.505217
GO_REGULATION_OF_VIRAL_INDUCED_CYTOPLASMIC_PATTERN_RECOGNITION_RECEPTOR_SIGNALING_PATHWAY	17	-0.433063	-1.15019	0.305369	0.507414
GO_T_CELL_DIFFERENTIATION_IN_THYMUS	56	-0.329986	-1.14985	0.241667	0.507736
GO_POSITIVE_REGULATION_OF_ERBB_SIGNALING_PATHWAY	25	-0.384586	-1.14899	0.268769	0.509364
GO_ENDODERM_FORMATION	40	-0.36222	-1.14821	0.255014	0.510797
GO_REGULATION_OF_ACTIN_FILAMENT_BASED_PROCESS	306	-0.268328	-1.14789	0.185104	0.511069
GO_MEMBRANE_DEPOLARIZATION	59	-0.334555	-1.14741	0.252387	0.511732
GO_REGULATION_OF_B_CELL_APOPTOTIC_PROCESS	17	-0.425301	-1.14732	0.296825	0.511444
GO_DIOL_BIOSYNTHETIC_PROCESS	17	-0.423446	-1.14718	0.278878	0.511267
GO_PEPTIDYL_SERINE_MODIFICATION	239	-0.275181	-1.14599	0.189128	0.513751
GO_CARDIAC_EPITHELIAL_TO_MESENCHYMAL_TRANSITION	25	-0.394095	-1.1459	0.279032	0.513452
GO_POSITIVE_REGULATION_OF_PLASMA_MEMBRANE_BOUNDED_CELL_PROJECTION_ASSEMBLY	77	-0.313233	-1.14487	0.249671	0.515409
GO_REGULATION_OF_NEUROBLAST_PROLIFERATION	20	-0.408551	-1.14429	0.296998	0.516295
GO_RESPONSE_TO_VIRUS	230	-0.275432	-1.14415	0.19	0.516131
GO_ANDROGEN_RECEPTOR_SIGNALING_PATHWAY	51	-0.337383	-1.14387	0.252747	0.516379
GO_ORGANOPHOSPHATE_METABOLIC_PROCESS	401	-0.265099	-1.14371	0.162047	0.516256
GO_DEMETHYLATION	46	-0.351613	-1.14368	0.271429	0.515826
GO_CELLULAR_RESPONSE_TO_CORTICOSTEROID_STIMULUS	48	-0.339387	-1.14368	0.268362	0.515334
GO_CARDIAC_MUSCLE_CELL_DIFFERENTIATION	87	-0.307544	-1.1435	0.237852	0.515293
GO_NUCLEOTIDE_BINDING_DOMAIN_LEUCINE_RICH_REPEAT_CONTAINING_RECEPTOR_SIGNALING_PATHWAY	34	-0.366591	-1.14312	0.275811	0.515726
GO_CYTOPLASMIC_PATTERN_RECOGNITION_RECEPTOR_SIGNALING_PATHWAY	56	-0.337803	-1.14291	0.274966	0.515744
GO_DETECTION_OF_ABIOTIC_STIMULUS	59	-0.328024	-1.14265	0.251788	0.51593
GO_CARDIAC_VENTRICLE_MORPHOGENESIS	52	-0.34016	-1.14228	0.265306	0.516332
GO_CELL_SUBSTRATE_ADHESION	280	-0.267206	-1.1416	0.201542	0.517535
GO_REGULATION_OF_PROTEIN_BINDING	186	-0.277842	-1.14036	0.208726	0.520094
GO_ACTIN_FILAMENT_POLYMERIZATION	145	-0.284671	-1.1403	0.235995	0.519748
GO_POSITIVE_REGULATION_OF_DEPHOSPHORYLATION	48	-0.346043	-1.1393	0.257746	0.521651
GO_POSITIVE_REGULATION_OF_PROTEIN_MODIFICATION_BY_SMALL_PROTEIN_CONJUGATION_OR_REMOVAL	115	-0.294416	-1.139	0.236546	0.52193
GO_NEGATIVE_REGULATION_OF_VASCULATURE_DEVELOPMENT	96	-0.302366	-1.13698	0.245796	0.526356
GO_NEUROTRANSMITTER_BIOSYNTHETIC_PROCESS	65	-0.321487	-1.13596	0.255525	0.528427
GO_FEMALE_SEX_DIFFERENTIATION	91	-0.305946	-1.13533	0.253197	0.529482
GO_NEGATIVE_REGULATION_OF_PROTEIN_SERINE_THREONINE_KINASE_ACTIVITY	117	-0.293797	-1.13448	0.260759	0.531119
GO_TORC1_SIGNALING	33	-0.36693	-1.13284	0.285496	0.534713
GO_FOAM_CELL_DIFFERENTIATION	26	-0.377146	-1.13277	0.280864	0.53438
GO_PULMONARY_VALVE_DEVELOPMENT	18	-0.427082	-1.13258	0.30198	0.534325
GO_NEGATIVE_REGULATION_OF_FIBROBLAST_PROLIFERATION	24	-0.386783	-1.13242	0.30031	0.534201
GO_POSITIVE_REGULATION_OF_NEURON_DEATH	72	-0.314018	-1.13225	0.268027	0.534107
GO_P38MAPK_CASCADE	40	-0.350515	-1.13205	0.275405	0.534147
GO_NEGATIVE_REGULATION_OF_DNA_BINDING_TRANSCRIPTION_FACTOR_ACTIVITY	129	-0.292202	-1.1315	0.25158	0.53504
GO_PRESYNAPTIC_ENDOCYTOSIS	40	-0.350087	-1.13072	0.293179	0.536483
GO_LYMPH_VESSEL_DEVELOPMENT	22	-0.395327	-1.1297	0.298246	0.538525
GO_REGULATION_OF_EXTENT_OF_CELL_GROWTH	83	-0.3043	-1.12867	0.271895	0.540577
GO_POSITIVE_REGULATION_OF_GROWTH	191	-0.276155	-1.12861	0.254813	0.540214
GO_SMOOTH_MUSCLE_CONTRACTION	63	-0.319735	-1.12861	0.291005	0.53971
GO_SENSORY_PERCEPTION_OF_LIGHT_STIMULUS	90	-0.300216	-1.12859	0.265707	0.539247
GO_NEGATIVE_REGULATION_OF_PHOSPHORUS_METABOLIC_PROCESS	434	-0.257155	-1.12798	0.176285	0.540318
GO_MUSCLE_ORGAN_DEVELOPMENT	279	-0.264793	-1.12774	0.211559	0.540415
GO_REGULATION_OF_MEMBRANE_PROTEIN_ECTODOMAIN_PROTEOLYSIS	20	-0.404264	-1.1272	0.296474	0.541211
GO_NEUROTRANSMITTER_UPTAKE	24	-0.386589	-1.12711	0.302652	0.540966
GO_POSITIVE_REGULATION_OF_DNA_RECOMBINATION	32	-0.371745	-1.12703	0.303571	0.540652
GO_NEUROTRANSMITTER_METABOLIC_PROCESS	89	-0.305545	-1.12592	0.277562	0.542809
GO_NEGATIVE_REGULATION_OF_TRANSFERASE_ACTIVITY	238	-0.267661	-1.12581	0.234411	0.542592
GO_RESPONSE_TO_EXTRACELLULAR_STIMULUS	380	-0.259913	-1.12529	0.207889	0.543419
GO_CYTOSOLIC_TRANSPORT	133	-0.285747	-1.12406	0.251511	0.545963
GO_RESPONSE_TO_KETONE	145	-0.284495	-1.12397	0.250605	0.545695
GO_RESPONSE_TO_TRANSFORMING_GROWTH_FACTOR_BETA	208	-0.273045	-1.12367	0.239207	0.545912
GO_NEGATIVE_REGULATION_OF_CAMP_MEDIATED_SIGNALING	15	-0.435578	-1.12357	0.314381	0.545653
GO_ADULT_LOCOMOTORY_BEHAVIOR	46	-0.338476	-1.12277	0.283668	0.547139
GO_INTERLEUKIN_7_MEDIATED_SIGNALING_PATHWAY	24	-0.386145	-1.12273	0.313002	0.546735
GO_EXTRACELLULAR_STRUCTURE_ORGANIZATION	322	-0.263304	-1.12239	0.20915	0.547093
GO_POSITIVE_REGULATION_OF_EXOCYTOSIS	59	-0.321791	-1.12222	0.28475	0.547031
GO_POSITIVE_REGULATION_OF_AUTOPHAGY	99	-0.297301	-1.12208	0.262613	0.546876
GO_REGULATION_OF_BONE_DEVELOPMENT	18	-0.416384	-1.12139	0.314332	0.54808
GO_NEGATIVE_REGULATION_OF_CELL_DIFFERENTIATION	496	-0.255799	-1.12084	0.183884	0.548931
GO_POSITIVE_REGULATION_OF_LAMELLIPODIUM_ASSEMBLY	16	-0.435165	-1.12062	0.340946	0.548956
GO_REGULATION_OF_ARP2_3_COMPLEX_MEDIATED_ACTIN_NUCLEATION	15	-0.422161	-1.12012	0.31962	0.549716
GO_DEPHOSPHORYLATION	380	-0.257921	-1.12011	0.198514	0.549238
GO_SUBSTRATE_DEPENDENT_CELL_MIGRATION	25	-0.380235	-1.12008	0.29477	0.548798
GO_REGULATION_OF_NMDA_RECEPTOR_ACTIVITY	20	-0.402864	-1.11989	0.31348	0.548791
GO_NEGATIVE_REGULATION_OF_HYDROLASE_ACTIVITY	284	-0.265378	-1.11948	0.217344	0.549295
GO_INTRASPECIES_INTERACTION_BETWEEN_ORGANISMS	28	-0.374935	-1.11856	0.322917	0.551145
GO_REGULATION_OF_MUSCLE_ORGAN_DEVELOPMENT	102	-0.294471	-1.11823	0.273736	0.551488
GO_STRIATED_MUSCLE_ADAPTATION	31	-0.36195	-1.11763	0.320552	0.552467
GO_REGULATION_OF_CILIUM_ASSEMBLY	41	-0.34903	-1.11745	0.313043	0.552391
GO_MEMBRANE_FUSION	112	-0.292931	-1.11705	0.268695	0.55289
GO_STRIATED_MUSCLE_CELL_DIFFERENTIATION	191	-0.276352	-1.11676	0.243337	0.553083
GO_RESPONSE_TO_ETHANOL	84	-0.306984	-1.11674	0.309237	0.552661
GO_CELLULAR_RESPONSE_TO_EXTRACELLULAR_STIMULUS	210	-0.266718	-1.11665	0.244014	0.552397
GO_NUCLEOTIDE_TRANSPORT	16	-0.419788	-1.1158	0.331675	0.553964
GO_POSITIVE_REGULATION_OF_CELL_MORPHOGENESIS_INVOLVED_IN_DIFFERENTIATION	121	-0.288494	-1.1154	0.285372	0.554473
GO_RESPONSE_TO_NUTRIENT	161	-0.279379	-1.11527	0.262353	0.554285
GO_GOLGI_TO_ENDOSOME_TRANSPORT	15	-0.425426	-1.11492	0.333893	0.554694
GO_CELL_PROJECTION_ASSEMBLY	451	-0.253834	-1.1146	0.208421	0.55498
GO_NEGATIVE_REGULATION_OF_PROTEIN_KINASE_B_SIGNALING	35	-0.353082	-1.11364	0.31454	0.556949
GO_POSITIVE_REGULATION_OF_SMOOTH_MUSCLE_CELL_PROLIFERATION	76	-0.306405	-1.11362	0.287516	0.556495
GO_MONOAMINE_TRANSPORT	36	-0.355789	-1.11358	0.315151	0.5561
GO_ATP_BIOSYNTHETIC_PROCESS	22	-0.384412	-1.11226	0.322034	0.558911
GO_CALCIUM_ION_IMPORT	48	-0.3314	-1.11176	0.326023	0.559726
GO_REGULATION_OF_RESPONSE_TO_BIOTIC_STIMULUS	97	-0.293889	-1.11124	0.283186	0.560513
GO_REGULATION_OF_HEART_GROWTH	50	-0.32909	-1.11103	0.313808	0.560534
GO_PHOSPHATIDIC_ACID_BIOSYNTHETIC_PROCESS	32	-0.370225	-1.11065	0.328358	0.561006
GO_REGULATION_OF_MULTI_ORGANISM_PROCESS	281	-0.260339	-1.11062	0.234392	0.56056
GO_ANIMAL_ORGAN_REGENERATION	64	-0.316983	-1.11051	0.284379	0.560372
GO_DRUG_TRANSPORT	113	-0.290767	-1.10906	0.279302	0.56349
GO_RETINAL_GANGLION_CELL_AXON_GUIDANCE	16	-0.423493	-1.10871	0.343384	0.563864
GO_REGULATION_OF_CARDIOCYTE_DIFFERENTIATION	38	-0.343098	-1.10865	0.328909	0.563521
GO_REGULATION_OF_DEPHOSPHORYLATION	166	-0.275253	-1.1077	0.278555	0.565426
GO_RESPONSE_TO_PURINE_CONTAINING_COMPOUND	109	-0.285959	-1.10662	0.281095	0.56774
GO_REGULATION_OF_ANATOMICAL_STRUCTURE_SIZE	366	-0.258002	-1.10599	0.229232	0.568858
GO_MUSCLE_SYSTEM_PROCESS	290	-0.260721	-1.10541	0.24406	0.569784
GO_NITRIC_OXIDE_MEDIATED_SIGNAL_TRANSDUCTION	17	-0.410747	-1.10531	0.330144	0.569501
GO_RESPONSE_TO_STEROL	25	-0.377387	-1.10527	0.335394	0.569094
GO_SPHINGOLIPID_METABOLIC_PROCESS	62	-0.314438	-1.1048	0.317935	0.569749
GO_ORGANOPHOSPHATE_BIOSYNTHETIC_PROCESS	434	-0.252433	-1.10462	0.22359	0.569711
GO_CELLULAR_DETOXIFICATION	70	-0.308489	-1.10459	0.291055	0.569276
GO_TISSUE_MIGRATION	243	-0.263734	-1.10419	0.258137	0.569816
GO_POSITIVE_REGULATION_OF_T_CELL_CYTOKINE_PRODUCTION	16	-0.42662	-1.10365	0.360841	0.570686
GO_NEGATIVE_REGULATION_OF_MICROTUBULE_DEPOLYMERIZATION	19	-0.395806	-1.10244	0.34127	0.573298
GO_POSITIVE_REGULATION_OF_NOTCH_SIGNALING_PATHWAY	39	-0.343802	-1.10177	0.319661	0.57447
GO_NEGATIVE_REGULATION_OF_BIOMINERAL_TISSUE_DEVELOPMENT	19	-0.403798	-1.10146	0.353583	0.574707
GO_POSITIVE_REGULATION_OF_ACTIN_FILAMENT_POLYMERIZATION	80	-0.300495	-1.10123	0.318182	0.574807
GO_PROGRAMMED_NECROTIC_CELL_DEATH	37	-0.347745	-1.1007	0.333828	0.575685
GO_DEVELOPMENTAL_CELL_GROWTH	169	-0.272267	-1.10056	0.281991	0.575495
GO_BLOOD_VESSEL_ENDOTHELIAL_CELL_MIGRATION	103	-0.2923	-1.1001	0.294479	0.576159
GO_GENITALIA_DEVELOPMENT	34	-0.357034	-1.09983	0.346037	0.576291
GO_POSITIVE_REGULATION_OF_ION_TRANSMEMBRANE_TRANSPORT	96	-0.288652	-1.09966	0.298089	0.576214
GO_REGULATION_OF_AUTOPHAGY	274	-0.260902	-1.0994	0.260259	0.576367
GO_PROTEIN_POLYMERIZATION	219	-0.264078	-1.09925	0.279228	0.576228
GO_NIK_NF_KAPPAB_SIGNALING	141	-0.278373	-1.09803	0.309227	0.578832
GO_VITAMIN_BIOSYNTHETIC_PROCESS	17	-0.413567	-1.09792	0.351082	0.578591
GO_CELLULAR_RESPONSE_TO_EXTERNAL_STIMULUS	267	-0.259567	-1.09757	0.257206	0.579014
GO_POSITIVE_REGULATION_OF_EPITHELIAL_CELL_APOPTOTIC_PROCESS	25	-0.370898	-1.09696	0.331818	0.580073
GO_NEGATIVE_REGULATION_OF_LIPID_STORAGE	16	-0.414232	-1.09656	0.36129	0.580587
GO_NEUTRAL_AMINO_ACID_TRANSPORT	26	-0.375519	-1.0963	0.345853	0.580725
GO_PROTEIN_PROCESSING	145	-0.276244	-1.09601	0.289697	0.580901
GO_CARDIAC_CELL_DEVELOPMENT	62	-0.317873	-1.09554	0.319892	0.581638
GO_AMINO_ACID_IMPORT	18	-0.409334	-1.09523	0.334395	0.581889
GO_REGULATION_OF_SYNAPTIC_TRANSMISSION_GLUTAMATERGIC	36	-0.346128	-1.09476	0.338855	0.582518
GO_NEGATIVE_REGULATION_OF_SMALL_MOLECULE_METABOLIC_PROCESS	47	-0.330133	-1.09467	0.321429	0.582261
GO_REGULATION_OF_PHOSPHATASE_ACTIVITY	137	-0.277574	-1.09417	0.287671	0.583029
GO_EXIT_FROM_MITOSIS	27	-0.362975	-1.09399	0.338757	0.582985
GO_NEGATIVE_REGULATION_OF_MULTI_ORGANISM_PROCESS	108	-0.285805	-1.09385	0.313376	0.582848
GO_POSITIVE_REGULATION_OF_RESPONSE_TO_CYTOKINE_STIMULUS	48	-0.322525	-1.09358	0.332851	0.583023
GO_BONE_MINERALIZATION	83	-0.30282	-1.09284	0.324967	0.584369
GO_NEGATIVE_REGULATION_OF_INTRACELLULAR_SIGNAL_TRANSDUCTION	400	-0.252142	-1.09215	0.269841	0.585659
GO_CELLULAR_IRON_ION_HOMEOSTASIS	50	-0.319552	-1.09179	0.328338	0.58612
GO_CELLULAR_RESPONSE_TO_DEXAMETHASONE_STIMULUS	25	-0.377909	-1.09152	0.374806	0.586292
GO_COLLAGEN_CATABOLIC_PROCESS	35	-0.348595	-1.09108	0.341954	0.586854
GO_AMYLOID_BETA_METABOLIC_PROCESS	36	-0.341518	-1.09058	0.325479	0.587627
GO_REGULATION_OF_RECEPTOR_MEDIATED_ENDOCYTOSIS	68	-0.310933	-1.09013	0.318421	0.588276
GO_POSITIVE_REGULATION_OF_CARDIAC_MUSCLE_TISSUE_DEVELOPMENT	38	-0.33978	-1.0897	0.341642	0.588878
GO_MUSCLE_ORGAN_MORPHOGENESIS	53	-0.317674	-1.0896	0.333824	0.588612
GO_ROOF_OF_MOUTH_DEVELOPMENT	70	-0.301137	-1.08955	0.310526	0.588237
GO_ACTIVATION_OF_PROTEIN_KINASE_ACTIVITY	264	-0.258982	-1.08907	0.29593	0.588955
GO_NEURON_PROJECTION_EXTENSION	127	-0.279142	-1.08867	0.318348	0.589439
GO_NEGATIVE_REGULATION_OF_OSSIFICATION	53	-0.327787	-1.0882	0.350217	0.590137
GO_NEGATIVE_REGULATION_OF_HISTONE_METHYLATION	19	-0.390994	-1.0879	0.342995	0.590378
GO_AMMONIUM_TRANSPORT	50	-0.322907	-1.08761	0.333799	0.590596
GO_REGULATION_OF_RECEPTOR_BINDING	17	-0.409066	-1.08708	0.360522	0.591407
GO_CELLULAR_RESPONSE_TO_TOXIC_SUBSTANCE	177	-0.269785	-1.08637	0.315545	0.592694
GO_SKELETAL_MUSCLE_CELL_DIFFERENTIATION	45	-0.321622	-1.08625	0.343391	0.592496
GO_NEGATIVE_REGULATION_OF_PROTEIN_MODIFICATION_PROCESS	476	-0.246943	-1.08585	0.27818	0.593026
GO_GLOMERULAR_EPITHELIUM_DEVELOPMENT	15	-0.417116	-1.08533	0.379139	0.593803
GO_DIGESTION	57	-0.312057	-1.08502	0.33195	0.594091
GO_POSITIVE_REGULATION_OF_PROTEIN_COMPLEX_ASSEMBLY	204	-0.263072	-1.0849	0.289709	0.593873
GO_CONTRACTILE_ACTIN_FILAMENT_BUNDLE_ASSEMBLY	84	-0.294804	-1.08479	0.335535	0.593645
GO_REGULATION_OF_RECEPTOR_INTERNALIZATION	38	-0.341273	-1.08422	0.339791	0.594544
GO_RESPONSE_TO_ORGANOPHOSPHORUS	98	-0.286555	-1.08355	0.31202	0.595746
GO_REGULATION_OF_NEUROTRANSMITTER_SECRETION	68	-0.300915	-1.08274	0.339973	0.597432
GO_RELAXATION_OF_MUSCLE	21	-0.391865	-1.08268	0.368175	0.59706
GO_TOR_SIGNALING	101	-0.287013	-1.08186	0.344828	0.598699
GO_REGULATION_OF_DIGESTIVE_SYSTEM_PROCESS	15	-0.413075	-1.08146	0.358306	0.599246
GO_PHOTOTRANSDUCTION_VISIBLE_LIGHT	16	-0.418744	-1.0814	0.363339	0.598887
GO_MUSCLE_CELL_PROLIFERATION	154	-0.270723	-1.08127	0.316471	0.598704
GO_POSITIVE_REGULATION_OF_CELLULAR_RESPONSE_TO_INSULIN_STIMULUS	19	-0.389296	-1.08101	0.359375	0.5989
GO_REGULATION_OF_MYOBLAST_DIFFERENTIATION	35	-0.342177	-1.0808	0.347059	0.598915
GO_REGULATION_OF_NUCLEOTIDE_BIOSYNTHETIC_PROCESS	25	-0.365004	-1.08062	0.367347	0.598872
GO_CELLULAR_RESPONSE_TO_CAMP	39	-0.335311	-1.08021	0.339411	0.599374
GO_POSITIVE_REGULATION_OF_PROTEIN_BINDING	86	-0.292234	-1.08018	0.342105	0.598946
GO_REGULATION_OF_CARDIAC_MUSCLE_TISSUE_DEVELOPMENT	63	-0.305375	-1.07954	0.340136	0.600045
GO_POSITIVE_REGULATION_OF_PROTEIN_ACETYLATION	39	-0.338176	-1.07943	0.362819	0.599817
GO_ORGANIC_ACID_BIOSYNTHETIC_PROCESS	203	-0.263357	-1.079	0.337117	0.600394
GO_NEGATIVE_REGULATION_OF_PHOSPHORYLATION	357	-0.250221	-1.07835	0.289902	0.601488
GO_POSITIVE_REGULATION_OF_EPIDERMAL_CELL_DIFFERENTIATION	16	-0.404237	-1.078	0.367973	0.601822
GO_HYPEROSMOTIC_RESPONSE	16	-0.415909	-1.07794	0.377207	0.601474
GO_REGULATION_OF_ACTIN_FILAMENT_BUNDLE_ASSEMBLY	82	-0.295426	-1.07776	0.33208	0.601402
GO_NEGATIVE_REGULATION_OF_PLASMA_MEMBRANE_BOUNDED_CELL_PROJECTION_ASSEMBLY	18	-0.399715	-1.0774	0.377389	0.601811
GO_RESPONSE_TO_VITAMIN	68	-0.302162	-1.07738	0.356662	0.60136
GO_MITOTIC_RECOMBINATION	21	-0.377085	-1.07649	0.366269	0.60315
GO_MEMORY	76	-0.293166	-1.07631	0.352638	0.60312
GO_NEGATIVE_REGULATION_OF_LIPID_LOCALIZATION	27	-0.362903	-1.07543	0.372163	0.604849
GO_REGULATION_OF_NEUROTRANSMITTER_TRANSPORT	90	-0.290291	-1.07533	0.339597	0.604587
GO_REGULATION_OF_PROTEIN_ACETYLATION	64	-0.30579	-1.07517	0.352055	0.60448
GO_NEGATIVE_REGULATION_OF_MUSCLE_CELL_DIFFERENTIATION	40	-0.338339	-1.07502	0.37	0.604399
GO_SYNAPSE_MATURATION	17	-0.399001	-1.07457	0.350584	0.605069
GO_REGULATION_OF_ANION_TRANSMEMBRANE_TRANSPORT	23	-0.369743	-1.0736	0.373377	0.607046
GO_POLYSACCHARIDE_CATABOLIC_PROCESS	21	-0.386358	-1.07344	0.37401	0.606961
GO_BROWN_FAT_CELL_DIFFERENTIATION	30	-0.354416	-1.07219	0.373219	0.609632
GO_HISTONE_H4_ACETYLATION	63	-0.300577	-1.07219	0.335645	0.60914
GO_POSITIVE_REGULATION_OF_MULTI_ORGANISM_PROCESS	144	-0.269652	-1.07202	0.324163	0.609047
GO_ACTIVATION_OF_MAPK_ACTIVITY	119	-0.274818	-1.07177	0.333747	0.609171
GO_NEGATIVE_REGULATION_OF_MUSCLE_HYPERTROPHY	21	-0.378461	-1.07175	0.36725	0.608711
GO_NEGATIVE_REGULATION_OF_EPITHELIAL_CELL_PROLIFERATION	98	-0.281771	-1.07128	0.346154	0.609383
GO_POSITIVE_REGULATION_OF_WOUND_HEALING	36	-0.343476	-1.07119	0.355882	0.609081
GO_SOMATIC_DIVERSIFICATION_OF_IMMUNE_RECEPTORS	50	-0.31852	-1.07097	0.367143	0.609109
GO_POSITIVE_REGULATION_OF_CELL_PROJECTION_ORGANIZATION	290	-0.251499	-1.07097	0.310383	0.608618
GO_DETOXIFICATION	71	-0.298141	-1.07092	0.350474	0.608263
GO_NEGATIVE_REGULATION_OF_CALCIUM_ION_TRANSMEMBRANE_TRANSPORT	26	-0.363518	-1.0697	0.368254	0.61082
GO_DRUG_METABOLIC_PROCESS	201	-0.258688	-1.06821	0.339839	0.614102
GO_SYNAPSE_ORGANIZATION	283	-0.253619	-1.06727	0.336226	0.616095
GO_HISTONE_DEACETYLATION	65	-0.303773	-1.06625	0.367123	0.618142
GO_NEGATIVE_REGULATION_OF_TRANSMEMBRANE_RECEPTOR_PROTEIN_SERINE_THREONINE_KINASE_SIGNALING_PATHWAY	89	-0.286114	-1.06554	0.353982	0.619479
GO_CELL_DIFFERENTIATION_IN_SPINAL_CORD	23	-0.375587	-1.0652	0.372129	0.619838
GO_REGULATION_OF_CARBOHYDRATE_BIOSYNTHETIC_PROCESS	70	-0.299997	-1.06478	0.360634	0.620419
GO_REGULATION_OF_BLOOD_PRESSURE	99	-0.282817	-1.06436	0.352572	0.620985
GO_CARBOHYDRATE_PHOSPHORYLATION	24	-0.362422	-1.06398	0.376344	0.621413
GO_REGULATION_OF_PEPTIDYL_SERINE_PHOSPHORYLATION	93	-0.280845	-1.06375	0.349869	0.621474
GO_NEURON_PROJECTION_ORGANIZATION	73	-0.297209	-1.06273	0.354839	0.623571
GO_REGULATION_OF_TRANSPORTER_ACTIVITY	173	-0.262264	-1.06272	0.347107	0.623083
GO_POSITIVE_REGULATION_OF_MRNA_SPLICING_VIA_SPLICEOSOME	17	-0.398227	-1.06199	0.370432	0.624395
GO_MRNA_TRANSCRIPTION	20	-0.382431	-1.06174	0.37037	0.624581
GO_ACID_SECRETION	60	-0.307993	-1.0616	0.359781	0.624423
GO_FAT_SOLUBLE_VITAMIN_METABOLIC_PROCESS	23	-0.368076	-1.06043	0.377845	0.626936
GO_INTERFERON_GAMMA_MEDIATED_SIGNALING_PATHWAY	58	-0.305729	-1.0596	0.365359	0.628555
GO_LIPOSACCHARIDE_METABOLIC_PROCESS	44	-0.324313	-1.0591	0.386831	0.629339
GO_CERAMIDE_METABOLIC_PROCESS	20	-0.376546	-1.05878	0.396256	0.629669
GO_INTERACTION_WITH_HOST	161	-0.263242	-1.05872	0.350588	0.629301
GO_POSITIVE_REGULATION_OF_MACROAUTOPHAGY	59	-0.302087	-1.05865	0.343708	0.628961
GO_REGULATION_OF_MEMBRANE_DEPOLARIZATION	33	-0.343209	-1.05797	0.395415	0.630143
GO_REGULATION_OF_VASCULAR_SMOOTH_MUSCLE_CELL_PROLIFERATION	48	-0.313193	-1.05721	0.380223	0.631547
GO_MUSCLE_CELL_DIFFERENTIATION	257	-0.250564	-1.05603	0.365044	0.634088
GO_POTASSIUM_ION_HOMEOSTASIS	21	-0.374081	-1.05503	0.397152	0.636134
GO_ENDOSOMAL_TRANSPORT	187	-0.260756	-1.0549	0.370499	0.635976
GO_RESPONSE_TO_MECHANICAL_STIMULUS	148	-0.265349	-1.05451	0.372738	0.636396
GO_ACTIVATION_OF_JUN_KINASE_ACTIVITY	35	-0.332886	-1.05418	0.393393	0.636719
GO_MAINTENANCE_OF_CELL_POLARITY	16	-0.397322	-1.05395	0.4	0.636831
GO_AMEBOIDAL_TYPE_CELL_MIGRATION	328	-0.244615	-1.05366	0.355914	0.637002
GO_REGULATION_OF_MEMBRANE_POTENTIAL	241	-0.252604	-1.05352	0.365772	0.636836
GO_PROCESS_UTILIZING_AUTOPHAGIC_MECHANISM	420	-0.243431	-1.05329	0.335789	0.636933
GO_REGULATION_OF_INTRACELLULAR_STEROID_HORMONE_RECEPTOR_SIGNALING_PATHWAY	61	-0.302092	-1.05213	0.385257	0.639367
GO_CELL_MATRIX_ADHESION	186	-0.258238	-1.052	0.35941	0.639175
GO_REGULATION_OF_DEVELOPMENTAL_GROWTH	230	-0.252831	-1.05186	0.359551	0.639053
GO_MEMBRANE_LIPID_BIOSYNTHETIC_PROCESS	117	-0.269568	-1.05166	0.362047	0.639041
GO_NEGATIVE_REGULATION_OF_PROTEIN_DEPHOSPHORYLATION	46	-0.317045	-1.05136	0.372781	0.639288
GO_AUTOPHAGOSOME_ORGANIZATION	83	-0.284305	-1.04953	0.388817	0.643485
GO_RESPONSE_TO_ATP	20	-0.384107	-1.04927	0.425432	0.643622
GO_REGULATION_OF_SUBSTRATE_ADHESION_DEPENDENT_CELL_SPREADING	40	-0.322413	-1.04894	0.393225	0.643933
GO_FATTY_ACID_METABOLIC_PROCESS	184	-0.258	-1.04834	0.381503	0.644918
GO_VACUOLAR_TRANSPORT	120	-0.270968	-1.04815	0.377834	0.644888
GO_REGULATION_OF_ACTIN_FILAMENT_ORGANIZATION	210	-0.251665	-1.04769	0.374282	0.645574
GO_POSITIVE_REGULATION_OF_PROTEIN_POLYMERIZATION	107	-0.275743	-1.04751	0.38239	0.645508
GO_STRIATED_MUSCLE_CELL_APOPTOTIC_PROCESS	31	-0.344062	-1.04646	0.407463	0.647619
GO_CIRCULATORY_SYSTEM_PROCESS	323	-0.24461	-1.04624	0.369775	0.64765
GO_REGULATION_OF_PEPTIDYL_LYSINE_ACETYLATION	54	-0.306118	-1.04586	0.397989	0.648127
GO_CELL_REDOX_HOMEOSTASIS	62	-0.296125	-1.04562	0.393151	0.648258
GO_VASCULAR_ENDOTHELIAL_GROWTH_FACTOR_PRODUCTION	30	-0.341466	-1.04484	0.401254	0.649678
GO_POSITIVE_REGULATION_OF_PEPTIDYL_SERINE_PHOSPHORYLATION	66	-0.294446	-1.04459	0.378849	0.6498
GO_SOMATIC_DIVERSIFICATION_OF_IMMUNE_RECEPTORS_VIA_GERMLINE_RECOMBINATION_WITHIN_A_SINGLE_LOCUS	44	-0.31839	-1.04452	0.381924	0.649471
GO_POSITIVE_REGULATION_OF_SYNAPTIC_TRANSMISSION_GLUTAMATERGIC	17	-0.395298	-1.04445	0.430693	0.649146
GO_TRANSCRIPTION_BY_RNA_POLYMERASE_III	49	-0.308607	-1.04444	0.410145	0.648661
GO_REGULATION_OF_PROTEIN_COMPLEX_ASSEMBLY	352	-0.243451	-1.04442	0.372487	0.648215
GO_POSITIVE_REGULATION_OF_HEART_GROWTH	32	-0.332556	-1.04408	0.405732	0.648575
GO_NEGATIVE_REGULATION_OF_MUSCLE_CELL_APOPTOTIC_PROCESS	27	-0.349724	-1.04396	0.404687	0.64835
GO_AXON_EXTENSION	97	-0.278045	-1.04388	0.383117	0.64805
GO_POSTSYNAPTIC_MEMBRANE_ORGANIZATION	25	-0.35432	-1.04376	0.393027	0.647859
GO_REGULATION_OF_MICROTUBULE_DEPOLYMERIZATION	24	-0.365546	-1.04339	0.428144	0.6483
GO_PROTEIN_DEGLYCOSYLATION	26	-0.349851	-1.04319	0.387247	0.648275
GO_MACROMOLECULE_DEACYLATION	88	-0.281821	-1.04308	0.393041	0.648051
GO_POSITIVE_REGULATION_OF_PEPTIDYL_LYSINE_ACETYLATION	31	-0.339461	-1.04267	0.406677	0.648515
GO_RESPONSE_TO_LITHIUM_ION	16	-0.393585	-1.04258	0.433898	0.648236
GO_IRON_ION_TRANSMEMBRANE_TRANSPORT	15	-0.410737	-1.04243	0.418333	0.648114
GO_DETECTION_OF_STIMULUS	132	-0.26664	-1.04169	0.400242	0.649451
GO_CELLULAR_RESPONSE_TO_PEPTIDE_HORMONE_STIMULUS	240	-0.248096	-1.04142	0.382483	0.649622
GO_CELLULAR_RESPONSE_TO_GROWTH_HORMONE_STIMULUS	16	-0.394297	-1.04012	0.406977	0.652375
GO_CELLULAR_RESPONSE_TO_FLUID_SHEAR_STRESS	17	-0.383887	-1.03959	0.394737	0.653244
GO_CELLULAR_CARBOHYDRATE_METABOLIC_PROCESS	199	-0.25411	-1.03864	0.389791	0.655194
GO_OLIGODENDROCYTE_DIFFERENTIATION	65	-0.295301	-1.03822	0.416442	0.65574
GO_DENDRITE_DEVELOPMENT	176	-0.255563	-1.03728	0.401408	0.657604
GO_POSITIVE_REGULATION_OF_AXON_EXTENSION	33	-0.332613	-1.03725	0.414003	0.657159
GO_REGULATION_OF_DEFENSE_RESPONSE_TO_VIRUS	55	-0.295064	-1.03691	0.413747	0.657458
GO_MEMBRANE_DEPOLARIZATION_DURING_ACTION_POTENTIAL	26	-0.347006	-1.03664	0.402174	0.657627
GO_SIGNAL_RELEASE	296	-0.243614	-1.03568	0.384615	0.659623
GO_GLOMERULUS_DEVELOPMENT	47	-0.311241	-1.03552	0.412607	0.659508
GO_NEGATIVE_REGULATION_OF_CYTOKINE_PRODUCTION_INVOLVED_IN_IMMUNE_RESPONSE	16	-0.3922	-1.03443	0.423948	0.661736
GO_POTASSIUM_ION_TRANSPORT	126	-0.26279	-1.03396	0.398022	0.66243
GO_POSITIVE_REGULATION_OF_NEUROTRANSMITTER_TRANSPORT	26	-0.345771	-1.03388	0.418816	0.66215
GO_NEGATIVE_REGULATION_OF_SIGNAL_TRANSDUCTION_IN_ABSENCE_OF_LIGAND	30	-0.33876	-1.03387	0.405159	0.661667
GO_POSITIVE_REGULATION_OF_MYOTUBE_DIFFERENTIATION	17	-0.395032	-1.03357	0.426518	0.661944
GO_RETINA_VASCULATURE_DEVELOPMENT_IN_CAMERA_TYPE_EYE	16	-0.388343	-1.03331	0.415873	0.66206
GO_REGULATION_OF_ACTIVIN_RECEPTOR_SIGNALING_PATHWAY	19	-0.372214	-1.03264	0.429725	0.663264
GO_REGULATION_OF_OLIGODENDROCYTE_DIFFERENTIATION	24	-0.350439	-1.03177	0.410061	0.664959
GO_REGULATION_OF_CELL_MORPHOGENESIS_INVOLVED_IN_DIFFERENTIATION	229	-0.250137	-1.03166	0.405405	0.664725
GO_INTRACELLULAR_STEROID_HORMONE_RECEPTOR_SIGNALING_PATHWAY	104	-0.273087	-1.02995	0.402075	0.66854
GO_ENDOCARDIAL_CUSHION_DEVELOPMENT	37	-0.324142	-1.02962	0.404545	0.66891
GO_RETROGRADE_TRANSPORT_ENDOSOME_TO_GOLGI	67	-0.285486	-1.02922	0.399731	0.669428
GO_POSITIVE_REGULATION_OF_ACTIN_FILAMENT_BUNDLE_ASSEMBLY	55	-0.29977	-1.02887	0.408719	0.669811
GO_RESPONSE_TO_DSRNA	36	-0.323598	-1.02873	0.413994	0.669664
GO_CELLULAR_RESPONSE_TO_INSULIN_STIMULUS	177	-0.252036	-1.0283	0.421237	0.670258
GO_RECEPTOR_CLUSTERING	40	-0.324096	-1.02728	0.429197	0.672344
GO_ANATOMICAL_STRUCTURE_HOMEOSTASIS	323	-0.238314	-1.02699	0.393051	0.672566
GO_DRUG_CATABOLIC_PROCESS	48	-0.305663	-1.02654	0.414226	0.673134
GO_FACE_MORPHOGENESIS	25	-0.348147	-1.02343	0.431062	0.680501
GO_REGULATION_OF_STEM_CELL_PROLIFERATION	46	-0.308345	-1.02329	0.425844	0.680318
GO_OVULATION_CYCLE	45	-0.307953	-1.02308	0.412023	0.680342
GO_NEGATIVE_REGULATION_OF_HISTONE_MODIFICATION	34	-0.328997	-1.02236	0.423881	0.681702
GO_POSITIVE_REGULATION_OF_TRANSMEMBRANE_TRANSPORT	130	-0.258901	-1.02225	0.429257	0.681443
GO_POSITIVE_REGULATION_OF_NERVOUS_SYSTEM_DEVELOPMENT	371	-0.238165	-1.0222	0.428419	0.681063
GO_REGULATION_OF_CALCIUM_ION_TRANSMEMBRANE_TRANSPORTER_ACTIVITY	60	-0.29745	-1.02206	0.433476	0.680892
GO_REGULATION_OF_TRANS_SYNAPTIC_SIGNALING	285	-0.240826	-1.02181	0.439344	0.681033
GO_BIOMINERAL_TISSUE_DEVELOPMENT	107	-0.265872	-1.02172	0.419314	0.680723
GO_TRNA_MODIFICATION	78	-0.279199	-1.02171	0.420912	0.680249
GO_POSITIVE_REGULATION_OF_ISOTYPE_SWITCHING	18	-0.380869	-1.02155	0.429027	0.680104
GO_PLATELET_DEGRANULATION	100	-0.267447	-1.0205	0.410323	0.682224
GO_SKELETAL_SYSTEM_DEVELOPMENT	375	-0.236214	-1.01985	0.434783	0.683372
GO_PULMONARY_VALVE_MORPHOGENESIS	15	-0.389625	-1.01973	0.435855	0.683138
GO_OVULATION_CYCLE_PROCESS	32	-0.333973	-1.01973	0.425039	0.682633
GO_RESPONSE_TO_METAL_ION	255	-0.242185	-1.01947	0.428571	0.682803
GO_SYNAPTIC_SIGNALING	416	-0.233748	-1.01902	0.407563	0.683394
GO_NEGATIVE_REGULATION_OF_STRIATED_MUSCLE_CELL_DIFFERENTIATION	26	-0.343671	-1.01808	0.422535	0.685182
GO_THIOESTER_METABOLIC_PROCESS	35	-0.326143	-1.01805	0.434074	0.684731
GO_REGULATION_OF_CYTOSKELETON_ORGANIZATION	435	-0.234386	-1.0177	0.436782	0.685133
GO_REGULATION_OF_ORGANELLE_ASSEMBLY	154	-0.25563	-1.01736	0.449223	0.685477
GO_FATTY_ACID_TRANSMEMBRANE_TRANSPORT	16	-0.380117	-1.01645	0.466667	0.687227
GO_REGULATION_OF_OSSIFICATION	141	-0.255797	-1.01599	0.438175	0.687862
GO_CELLULAR_RESPONSE_TO_ANTIBIOTIC	121	-0.259053	-1.01547	0.44686	0.688638
GO_POSITIVE_REGULATION_OF_CELLULAR_COMPONENT_BIOGENESIS	406	-0.232952	-1.01522	0.456842	0.688752
GO_HEART_VALVE_DEVELOPMENT	52	-0.297729	-1.01476	0.432877	0.689409
GO_NEGATIVE_REGULATION_OF_STEROID_METABOLIC_PROCESS	17	-0.383267	-1.01433	0.424337	0.689972
GO_CYTOPLASMIC_PATTERN_RECOGNITION_RECEPTOR_SIGNALING_PATHWAY_IN_RESPONSE_TO_VIRUS	23	-0.352482	-1.01377	0.435612	0.690897
GO_REGULATION_OF_SKELETAL_MUSCLE_TISSUE_DEVELOPMENT	33	-0.32634	-1.01341	0.439098	0.691295
GO_REGULATION_OF_NOTCH_SIGNALING_PATHWAY	81	-0.279585	-1.01301	0.455979	0.691756
GO_RESPONSE_TO_ACID_CHEMICAL	241	-0.241864	-1.01269	0.43736	0.692035
GO_VESICLE_MEDIATED_TRANSPORT_BETWEEN_ENDOSOMAL_COMPARTMENTS	39	-0.314156	-1.01266	0.430216	0.691568
GO_ACTIN_FILAMENT_BUNDLE_ORGANIZATION	132	-0.259186	-1.01241	0.443362	0.69166
GO_REGULATION_OF_BICELLULAR_TIGHT_JUNCTION_ASSEMBLY	18	-0.371941	-1.01046	0.438625	0.696087
GO_POSITIVE_REGULATION_OF_MUSCLE_TISSUE_DEVELOPMENT	54	-0.295709	-1.01024	0.446176	0.69612
GO_SYNAPTIC_TRANSMISSION_GABAERGIC	25	-0.342052	-1.00998	0.421553	0.696272
GO_NEGATIVE_REGULATION_OF_ENDOCYTOSIS	30	-0.332869	-1.00899	0.437216	0.698308
GO_HORMONE_BIOSYNTHETIC_PROCESS	42	-0.308711	-1.00896	0.450925	0.697863
GO_MUSCLE_CELL_APOPTOTIC_PROCESS	54	-0.293313	-1.00853	0.447945	0.698397
GO_NECROTIC_CELL_DEATH	42	-0.308525	-1.00828	0.447143	0.698517
GO_ESTABLISHMENT_OR_MAINTENANCE_OF_CELL_POLARITY	180	-0.246143	-1.0082	0.435185	0.698218
GO_TRNA_METHYLATION	35	-0.31782	-1.00785	0.46539	0.698625
GO_UNSATURATED_FATTY_ACID_METABOLIC_PROCESS	42	-0.307048	-1.00782	0.458571	0.69819
GO_SIGNAL_RELEASE_FROM_SYNAPSE	105	-0.267114	-1.00756	0.467337	0.698323
GO_CARDIAC_MUSCLE_TISSUE_DEVELOPMENT	158	-0.251827	-1.00741	0.45119	0.69819
GO_GLYCOPROTEIN_METABOLIC_PROCESS	104	-0.266852	-1.00695	0.470588	0.698856
GO_POSITIVE_REGULATION_OF_TRANSPORTER_ACTIVITY	71	-0.279167	-1.00687	0.457831	0.698565
GO_SYNAPTIC_VESICLE_CYCLE	129	-0.256023	-1.00681	0.467162	0.6982
GO_DEVELOPMENT_OF_PRIMARY_FEMALE_SEXUAL_CHARACTERISTICS	78	-0.274471	-1.00654	0.457219	0.698388
GO_NEGATIVE_REGULATION_OF_RESPONSE_TO_BIOTIC_STIMULUS	30	-0.330765	-1.00593	0.451709	0.69943
GO_CARBOHYDRATE_TRANSPORT	99	-0.267813	-1.0055	0.460076	0.699987
GO_POSITIVE_REGULATION_OF_NEUROTRANSMITTER_SECRETION	17	-0.381923	-1.00508	0.452769	0.700516
GO_HEAD_MORPHOGENESIS	28	-0.329941	-1.005	0.464455	0.700207
GO_ACTIN_NUCLEATION	42	-0.313313	-1.00498	0.439655	0.699768
GO_REGULATION_OF_SYSTEMIC_ARTERIAL_BLOOD_PRESSURE	49	-0.297411	-1.00492	0.449516	0.699387
GO_RESPONSE_TO_DEXAMETHASONE	32	-0.326654	-1.00474	0.441176	0.6993
GO_RENAL_SYSTEM_PROCESS	72	-0.280908	-1.00444	0.448871	0.699525
GO_POSITIVE_REGULATION_OF_EPITHELIAL_CELL_MIGRATION	127	-0.259907	-1.00378	0.472819	0.700661
GO_RELEASE_OF_SEQUESTERED_CALCIUM_ION_INTO_CYTOSOL_BY_ENDOPLASMIC_RETICULUM	20	-0.363036	-1.00242	0.465732	0.703499
GO_MONOCARBOXYLIC_ACID_METABOLIC_PROCESS	320	-0.235312	-1.00222	0.482391	0.703504
GO_INSULIN_RECEPTOR_SIGNALING_PATHWAY	114	-0.260459	-1.00205	0.464771	0.703423
GO_ENDOTHELIAL_CELL_MIGRATION	174	-0.247578	-1.00149	0.473502	0.70436
GO_RNA_MODIFICATION	134	-0.253356	-1.00092	0.453771	0.705276
GO_CELL_FATE_COMMITMENT	142	-0.255183	-1.00069	0.460591	0.705304
GO_POLYSACCHARIDE_METABOLIC_PROCESS	80	-0.272817	-0.999273	0.481095	0.708274
GO_NEGATIVE_REGULATION_OF_GENE_SILENCING	29	-0.330469	-0.999054	0.449925	0.70827
GO_CELLULAR_RESPONSE_TO_ORGANIC_CYCLIC_COMPOUND	415	-0.228227	-0.99874	0.486911	0.708569
GO_LIVER_REGENERATION	27	-0.336461	-0.998557	0.466063	0.708501
GO_MUSCLE_STRUCTURE_DEVELOPMENT	464	-0.229153	-0.998498	0.498449	0.708144
GO_CARDIAC_MUSCLE_CELL_PROLIFERATION	40	-0.310517	-0.996333	0.492857	0.713024
GO_CELLULAR_RESPONSE_TO_CADMIUM_ION	22	-0.348967	-0.996156	0.467919	0.712964
GO_POST_GOLGI_VESICLE_MEDIATED_TRANSPORT	93	-0.266153	-0.995803	0.46926	0.713288
GO_PROTEIN_TARGETING_TO_VACUOLE	32	-0.32303	-0.995606	0.465976	0.713253
GO_MOTOR_NEURON_AXON_GUIDANCE	20	-0.3567	-0.995072	0.455859	0.714053
GO_MAINTENANCE_OF_LOCATION_IN_CELL	76	-0.271299	-0.994625	0.476129	0.714683
GO_RESPONSE_TO_GROWTH_HORMONE	25	-0.335152	-0.994289	0.467492	0.714993
GO_CARDIOCYTE_DIFFERENTIATION	113	-0.254355	-0.99426	0.487469	0.71454
GO_NEGATIVE_REGULATION_OF_ACTIN_FILAMENT_BUNDLE_ASSEMBLY	19	-0.370551	-0.99374	0.471545	0.715293
GO_MITOCHONDRIAL_FUSION	20	-0.354525	-0.993674	0.450549	0.714947
GO_REGENERATION	137	-0.252018	-0.993308	0.466184	0.715366
GO_REGULATION_OF_EXTRINSIC_APOPTOTIC_SIGNALING_PATHWAY_IN_ABSENCE_OF_LIGAND	40	-0.310406	-0.991171	0.470414	0.720122
GO_NEGATIVE_REGULATION_OF_DEFENSE_RESPONSE_TO_VIRUS	19	-0.360964	-0.991167	0.456667	0.719622
GO_MEMBRANE_DISASSEMBLY	16	-0.379012	-0.991134	0.471477	0.719184
GO_DEVELOPMENTAL_GROWTH_INVOLVED_IN_MORPHOGENESIS	178	-0.244047	-0.990295	0.484321	0.720738
GO_NEGATIVE_REGULATION_OF_CELLULAR_RESPONSE_TO_GROWTH_FACTOR_STIMULUS	116	-0.258854	-0.990259	0.478155	0.720314
GO_CLATHRIN_DEPENDENT_ENDOCYTOSIS	36	-0.314787	-0.988554	0.467344	0.723889
GO_PEPTIDYL_THREONINE_MODIFICATION	103	-0.258069	-0.987421	0.498104	0.72619
GO_REGULATION_OF_EXECUTION_PHASE_OF_APOPTOSIS	20	-0.35531	-0.987105	0.470769	0.726449
GO_MICROTUBULE_POLYMERIZATION	59	-0.282493	-0.985428	0.491501	0.730108
GO_DITERPENOID_METABOLIC_PROCESS	49	-0.292902	-0.985026	0.485876	0.730545
GO_RESPONSE_TO_AMMONIUM_ION	72	-0.274976	-0.98483	0.487603	0.730497
GO_NEGATIVE_REGULATION_OF_AUTOPHAGY	70	-0.273635	-0.984076	0.472848	0.73186
GO_RESPONSE_TO_HYDROPEROXIDE	16	-0.374113	-0.98277	0.468498	0.734563
GO_NEGATIVE_REGULATION_OF_PROTEIN_BINDING	83	-0.265297	-0.981936	0.505168	0.736121
GO_REGULATION_OF_PEPTIDE_HORMONE_SECRETION	138	-0.249459	-0.981409	0.492806	0.736894
GO_TRABECULA_MORPHOGENESIS	39	-0.306084	-0.981052	0.51395	0.737262
GO_CELLULAR_RESPONSE_TO_REACTIVE_NITROGEN_SPECIES	16	-0.372712	-0.980539	0.488487	0.738035
GO_SPHINGOLIPID_BIOSYNTHETIC_PROCESS	83	-0.266125	-0.979987	0.473684	0.738885
GO_DENDRITE_EXTENSION	20	-0.345811	-0.979894	0.460163	0.738585
GO_PIGMENT_GRANULE_LOCALIZATION	24	-0.338273	-0.978434	0.504532	0.741698
GO_SKELETAL_MUSCLE_ORGAN_DEVELOPMENT	113	-0.255102	-0.978264	0.499388	0.741598
GO_ADULT_BEHAVIOR	73	-0.269493	-0.977683	0.484605	0.742515
GO_EXTRACELLULAR_MATRIX_DISASSEMBLY	56	-0.281298	-0.977219	0.483131	0.743138
GO_PEPTIDE_CATABOLIC_PROCESS	21	-0.348355	-0.975659	0.501577	0.746538
GO_REGULATION_OF_SODIUM_ION_TRANSPORT	66	-0.274751	-0.975502	0.505435	0.746392
GO_SULFUR_COMPOUND_BIOSYNTHETIC_PROCESS	137	-0.24781	-0.973999	0.533413	0.749534
GO_INTERACTION_WITH_SYMBIONT	54	-0.288207	-0.973898	0.506925	0.74926
GO_REGULATION_OF_CHOLESTEROL_BIOSYNTHETIC_PROCESS	38	-0.302067	-0.973563	0.504335	0.749529
GO_SYNAPTIC_VESICLE_CYTOSKELETAL_TRANSPORT	16	-0.374807	-0.973476	0.494453	0.749205
GO_REGULATION_OF_CATION_CHANNEL_ACTIVITY	100	-0.256798	-0.972064	0.512469	0.752054
GO_POSITIVE_REGULATION_OF_EXTRACELLULAR_MATRIX_ORGANIZATION	18	-0.358883	-0.971073	0.5	0.753989
GO_RESPONSE_TO_AMPHETAMINE	19	-0.350259	-0.969965	0.497553	0.756259
GO_REGULATION_OF_ISOTYPE_SWITCHING	26	-0.320859	-0.969584	0.505426	0.756646
GO_RESPONSE_TO_TOXIC_SUBSTANCE	348	-0.226634	-0.968683	0.560557	0.758308
GO_ESTABLISHMENT_OF_PROTEIN_LOCALIZATION_TO_VACUOLE	36	-0.302473	-0.968412	0.505263	0.758458
GO_REGULATION_OF_ORGAN_GROWTH	72	-0.271412	-0.967292	0.508519	0.760682
GO_RESPONSE_TO_LEPTIN	17	-0.362084	-0.967103	0.535599	0.760608
GO_RESPONSE_TO_INSULIN	216	-0.232578	-0.966793	0.535874	0.760829
GO_REGULATION_OF_CHROMATIN_ORGANIZATION	152	-0.24075	-0.96639	0.54186	0.761306
GO_SYNAPTIC_TRANSMISSION_GLUTAMATERGIC	47	-0.289452	-0.966271	0.496434	0.761061
GO_POSITIVE_REGULATION_OF_PROTEIN_COMPLEX_DISASSEMBLY	28	-0.31877	-0.96623	0.520674	0.760637
GO_POSITIVE_REGULATION_OF_CALCIUM_ION_TRANSMEMBRANE_TRANSPORT	45	-0.292876	-0.965887	0.526685	0.760934
GO_MODIFIED_AMINO_ACID_TRANSPORT	18	-0.34903	-0.964581	0.487578	0.763603
GO_NEGATIVE_REGULATION_OF_HEART_CONTRACTION	16	-0.364002	-0.96352	0.516026	0.765735
GO_REGULATION_OF_LYMPHOCYTE_CHEMOTAXIS	17	-0.358584	-0.963376	0.503106	0.765565
GO_HORMONE_TRANSPORT	200	-0.233236	-0.96148	0.556948	0.769623
GO_SYNAPTIC_VESICLE_LOCALIZATION	113	-0.251546	-0.960823	0.535759	0.770745
GO_HISTONE_METHYLATION	117	-0.252092	-0.960372	0.545455	0.771348
GO_NONRIBOSOMAL_PEPTIDE_BIOSYNTHETIC_PROCESS	18	-0.351568	-0.960113	0.515924	0.771475
GO_REGULATION_OF_HORMONE_SECRETION	166	-0.236488	-0.959974	0.56213	0.771283
GO_MEGAKARYOCYTE_DIFFERENTIATION	78	-0.26885	-0.9599	0.52996	0.770915
GO_NEGATIVE_REGULATION_OF_NEURON_PROJECTION_DEVELOPMENT	116	-0.251493	-0.959864	0.534418	0.770474
GO_ISOPRENOID_METABOLIC_PROCESS	58	-0.272174	-0.959859	0.524862	0.769957
GO_SKELETAL_MUSCLE_TISSUE_REGENERATION	22	-0.337892	-0.959779	0.5328	0.769616
GO_COLLAGEN_FIBRIL_ORGANIZATION	47	-0.291294	-0.959308	0.51	0.770209
GO_CARBOHYDRATE_TRANSMEMBRANE_TRANSPORT	74	-0.267171	-0.958703	0.518617	0.771138
GO_CELLULAR_RESPONSE_TO_OXIDATIVE_STRESS	244	-0.229559	-0.957959	0.579356	0.772437
GO_NEGATIVE_REGULATION_OF_CELL_MATRIX_ADHESION	34	-0.308048	-0.95767	0.537335	0.772619
GO_NEGATIVE_REGULATION_OF_CELL_DEVELOPMENT	225	-0.230681	-0.957608	0.577803	0.772261
GO_TRANSITION_METAL_ION_TRANSPORT	91	-0.252903	-0.957332	0.532819	0.772398
GO_CHOLESTEROL_STORAGE	16	-0.364275	-0.956384	0.515755	0.774187
GO_PEPTIDE_HORMONE_SECRETION	162	-0.238858	-0.955947	0.584524	0.774764
GO_POSITIVE_REGULATION_OF_BLOOD_VESSEL_ENDOTHELIAL_CELL_MIGRATION	52	-0.278764	-0.955692	0.52809	0.774854
GO_ENDOSOME_TO_LYSOSOME_TRANSPORT	47	-0.286364	-0.955062	0.533239	0.775811
GO_LONG_CHAIN_FATTY_ACID_METABOLIC_PROCESS	49	-0.283817	-0.954924	0.533333	0.775624
GO_REGULATION_OF_CELLULAR_CARBOHYDRATE_METABOLIC_PROCESS	90	-0.255291	-0.953275	0.561769	0.7791
GO_MULTI_ORGANISM_BEHAVIOR	40	-0.292433	-0.952851	0.531205	0.779595
GO_CARDIAC_SEPTUM_DEVELOPMENT	92	-0.259237	-0.95259	0.555698	0.779723
GO_POSITIVE_REGULATION_OF_PHOSPHOPROTEIN_PHOSPHATASE_ACTIVITY	17	-0.35614	-0.951868	0.519793	0.780962
GO_CARDIAC_VENTRICLE_DEVELOPMENT	97	-0.255158	-0.951601	0.576623	0.781077
GO_NEGATIVE_REGULATION_OF_TRANSMEMBRANE_TRANSPORT	79	-0.255001	-0.951567	0.537869	0.780623
GO_POSITIVE_REGULATION_OF_AUTOPHAGY_OF_MITOCHONDRION	18	-0.353579	-0.951124	0.524752	0.781144
GO_SMOOTH_MUSCLE_CELL_APOPTOTIC_PROCESS	20	-0.338039	-0.9511	0.529061	0.78067
GO_REGULATION_OF_SMOOTH_MUSCLE_CELL_DIFFERENTIATION	26	-0.323782	-0.950939	0.531722	0.780535
GO_KILLING_OF_CELLS_OF_OTHER_ORGANISM	15	-0.365421	-0.950659	0.524193	0.78065
GO_VITAMIN_METABOLIC_PROCESS	91	-0.253218	-0.95018	0.561315	0.781319
GO_TRANSFORMING_GROWTH_FACTOR_BETA_RECEPTOR_SIGNALING_PATHWAY	159	-0.233924	-0.949985	0.592372	0.781249
GO_NEGATIVE_REGULATION_OF_TRANSLATIONAL_INITIATION	17	-0.348763	-0.949889	0.50416	0.780944
GO_REGULATION_OF_TELOMERE_CAPPING	24	-0.320696	-0.949358	0.535232	0.781685
GO_SENSORY_PERCEPTION	239	-0.226792	-0.949188	0.599775	0.781555
GO_NEGATIVE_REGULATION_OF_NERVOUS_SYSTEM_DEVELOPMENT	214	-0.230093	-0.948971	0.575827	0.781545
GO_INNATE_IMMUNE_RESPONSE_ACTIVATING_CELL_SURFACE_RECEPTOR_SIGNALING_PATHWAY	87	-0.258448	-0.94871	0.56658	0.781621
GO_REGULATION_OF_EXTRACELLULAR_MATRIX_ORGANIZATION	32	-0.305366	-0.94812	0.536585	0.782518
GO_REGULATION_OF_STEROID_METABOLIC_PROCESS	87	-0.25774	-0.947793	0.552699	0.782745
GO_REGULATION_OF_CELLULAR_RESPONSE_TO_TRANSFORMING_GROWTH_FACTOR_BETA_STIMULUS	97	-0.25036	-0.947723	0.562338	0.782379
GO_RESPONSE_TO_IONIZING_RADIATION	136	-0.238011	-0.947614	0.572979	0.782107
GO_POSITIVE_REGULATION_OF_BONE_MINERALIZATION	29	-0.312922	-0.947341	0.529412	0.782236
GO_POSITIVE_REGULATION_OF_CATABOLIC_PROCESS	355	-0.219467	-0.947255	0.613391	0.781927
GO_SCHWANN_CELL_DEVELOPMENT	25	-0.322276	-0.947163	0.538827	0.781635
GO_MEMBRANE_LIPID_METABOLIC_PROCESS	166	-0.236343	-0.947133	0.572115	0.781181
GO_VASCULAR_PROCESS_IN_CIRCULATORY_SYSTEM	100	-0.254323	-0.946835	0.571059	0.781379
GO_CELLULAR_MODIFIED_AMINO_ACID_CATABOLIC_PROCESS	20	-0.342284	-0.946657	0.544186	0.781293
GO_REGULATION_OF_SMOOTH_MUSCLE_CONTRACTION	35	-0.301558	-0.944727	0.537291	0.785379
GO_NON_MOTILE_CILIUM_ASSEMBLY	47	-0.283272	-0.944587	0.542203	0.785191
GO_REGULATION_OF_FATTY_ACID_METABOLIC_PROCESS	38	-0.295221	-0.942523	0.554235	0.789657
GO_NEUROBLAST_PROLIFERATION	39	-0.289935	-0.941316	0.565585	0.792039
GO_POSITIVE_REGULATION_OF_STRESS_FIBER_ASSEMBLY	46	-0.278878	-0.941173	0.537901	0.791873
GO_REGULATION_OF_NEURAL_PRECURSOR_CELL_PROLIFERATION	56	-0.275162	-0.941151	0.558459	0.791407
GO_ORGAN_GROWTH	136	-0.240073	-0.940565	0.575439	0.792256
GO_SULFUR_COMPOUND_METABOLIC_PROCESS	141	-0.236424	-0.939827	0.594238	0.79353
GO_REGULATION_OF_PROTEIN_LOCALIZATION_TO_CELL_PERIPHERY	91	-0.250847	-0.93954	0.567917	0.793674
GO_COFACTOR_CATABOLIC_PROCESS	35	-0.301674	-0.939109	0.546708	0.794184
GO_SMOOTH_MUSCLE_CELL_DIFFERENTIATION	47	-0.283669	-0.93875	0.574344	0.794488
GO_INOSITOL_PHOSPHATE_CATABOLIC_PROCESS	15	-0.358045	-0.938463	0.55286	0.794667
GO_ESTABLISHMENT_OF_ORGANELLE_LOCALIZATION	398	-0.216694	-0.937477	0.65678	0.796436
GO_NEGATIVE_REGULATION_OF_CELL_PROJECTION_ORGANIZATION	137	-0.240547	-0.936826	0.595995	0.79744
GO_SODIUM_ION_TRANSMEMBRANE_TRANSPORT	87	-0.247183	-0.935733	0.566327	0.799487
GO_POSITIVE_REGULATION_OF_PEPTIDASE_ACTIVITY	143	-0.237338	-0.935341	0.595923	0.799902
GO_CHEMICAL_SYNAPTIC_TRANSMISSION_POSTSYNAPTIC	55	-0.271599	-0.935271	0.570845	0.799532
GO_AXON_DEVELOPMENT	373	-0.216539	-0.934991	0.638388	0.799686
GO_REGULATION_OF_EPITHELIAL_CELL_DIFFERENTIATION	94	-0.247475	-0.934534	0.565445	0.800227
GO_REGULATION_OF_PROTEIN_TARGETING_TO_MEMBRANE	30	-0.311165	-0.933992	0.544765	0.801001
GO_SMALL_MOLECULE_BIOSYNTHETIC_PROCESS	485	-0.212783	-0.933577	0.684817	0.801407
GO_POSITIVE_REGULATION_OF_RNA_METABOLIC_PROCESS	61	-0.265703	-0.933503	0.597183	0.80105
GO_CELL_MORPHOGENESIS_INVOLVED_IN_NEURON_DIFFERENTIATION	432	-0.21457	-0.933431	0.669447	0.800688
GO_EMBRYONIC_SKELETAL_SYSTEM_MORPHOGENESIS	61	-0.264727	-0.932145	0.560217	0.803162
GO_PROTON_TRANSMEMBRANE_TRANSPORT	99	-0.248014	-0.931031	0.593631	0.805281
GO_POSITIVE_REGULATION_OF_DOUBLE_STRAND_BREAK_REPAIR	26	-0.316195	-0.930318	0.556782	0.806405
GO_RESPONSE_TO_BRONCHODILATOR	34	-0.296237	-0.930093	0.553598	0.806384
GO_REGULATION_OF_EPITHELIAL_CELL_APOPTOTIC_PROCESS	58	-0.267838	-0.929722	0.575035	0.806745
GO_MITOCHONDRIAL_GENOME_MAINTENANCE	19	-0.33685	-0.928186	0.569331	0.809762
GO_RESPONSE_TO_NERVE_GROWTH_FACTOR	40	-0.287321	-0.92786	0.606414	0.809995
GO_POSITIVE_REGULATION_OF_PROTEOLYSIS	283	-0.21836	-0.927752	0.634551	0.809718
GO_REGULATION_OF_GLUCOSE_TRANSMEMBRANE_TRANSPORT	56	-0.271186	-0.927039	0.58597	0.810853
GO_RESPONSE_TO_OXIDATIVE_STRESS	352	-0.21474	-0.926683	0.661308	0.811161
GO_NEGATIVE_REGULATION_OF_BMP_SIGNALING_PATHWAY	33	-0.296852	-0.926645	0.577364	0.810717
GO_REGULATION_OF_NEURON_PROJECTION_DEVELOPMENT	370	-0.214313	-0.925491	0.683316	0.812838
GO_NOTCH_SIGNALING_PATHWAY	147	-0.232658	-0.925272	0.606537	0.812829
GO_NEGATIVE_REGULATION_OF_REACTIVE_OXYGEN_SPECIES_BIOSYNTHETIC_PROCESS	24	-0.316111	-0.924151	0.567961	0.814907
GO_CARDIAC_ATRIUM_DEVELOPMENT	23	-0.330926	-0.922728	0.582181	0.817674
GO_PEPTIDYL_TYROSINE_DEPHOSPHORYLATION	82	-0.250726	-0.922533	0.607465	0.817599
GO_PLATELET_DERIVED_GROWTH_FACTOR_RECEPTOR_SIGNALING_PATHWAY	51	-0.275691	-0.922108	0.586395	0.818022
GO_CELLULAR_MODIFIED_AMINO_ACID_BIOSYNTHETIC_PROCESS	35	-0.292149	-0.921446	0.598854	0.819016
GO_NEGATIVE_REGULATION_OF_PEPTIDYL_LYSINE_ACETYLATION	16	-0.351801	-0.921127	0.552805	0.819234
GO_NCRNA_CATABOLIC_PROCESS	21	-0.32458	-0.921113	0.542902	0.818733
GO_FIBROBLAST_APOPTOTIC_PROCESS	18	-0.340476	-0.919115	0.577441	0.822793
GO_REGULATION_OF_SODIUM_ION_TRANSMEMBRANE_TRANSPORTER_ACTIVITY	40	-0.281751	-0.918901	0.595474	0.822719
GO_NEGATIVE_REGULATION_OF_CATABOLIC_PROCESS	245	-0.218045	-0.91838	0.670022	0.823395
GO_MUSCLE_TISSUE_DEVELOPMENT	280	-0.219334	-0.918226	0.674752	0.823211
GO_REGULATION_OF_TUBE_SIZE	78	-0.255459	-0.918185	0.619296	0.82276
GO_REGULATION_OF_HISTONE_DEACETYLATION	22	-0.322849	-0.917772	0.573016	0.823178
GO_REGULATION_OF_CELL_SUBSTRATE_ADHESION	173	-0.223738	-0.917771	0.642518	0.822648
GO_REGULATION_OF_PROTEIN_POLYMERIZATION	170	-0.227452	-0.917762	0.651323	0.822137
GO_NEGATIVE_REGULATION_OF_SPROUTING_ANGIOGENESIS	26	-0.308583	-0.915597	0.606707	0.826509
GO_NEGATIVE_REGULATION_OF_CELL_SUBSTRATE_ADHESION	52	-0.264586	-0.913157	0.615063	0.831615
GO_NEURON_PROJECTION_GUIDANCE	199	-0.225317	-0.913058	0.655644	0.831297
GO_HISTONE_H4_K16_ACETYLATION	20	-0.332122	-0.911566	0.600326	0.834181
GO_REGULATION_OF_PEPTIDASE_ACTIVITY	276	-0.21373	-0.911533	0.680355	0.833712
GO_NEGATIVE_REGULATION_OF_CALCIUM_MEDIATED_SIGNALING	24	-0.312544	-0.909992	0.572327	0.836684
GO_ASYMMETRIC_CELL_DIVISION	15	-0.356408	-0.909386	0.58254	0.837524
GO_NEGATIVE_REGULATION_OF_AXONOGENESIS	55	-0.266364	-0.908685	0.621438	0.83856
GO_RESPONSE_TO_GAMMA_RADIATION	53	-0.269199	-0.90867	0.597203	0.838058
GO_POSITIVE_REGULATION_OF_LONG_TERM_SYNAPTIC_POTENTIATION	15	-0.352998	-0.908203	0.590244	0.838583
GO_PYRIMIDINE_CONTAINING_COMPOUND_CATABOLIC_PROCESS	21	-0.32378	-0.908138	0.575321	0.838185
GO_FATTY_ACID_DERIVATIVE_BIOSYNTHETIC_PROCESS	39	-0.284064	-0.907938	0.599424	0.838096
GO_RESPONSE_TO_REACTIVE_OXYGEN_SPECIES	185	-0.223152	-0.906637	0.659251	0.840499
GO_INORGANIC_ANION_TRANSPORT	97	-0.239537	-0.905211	0.628088	0.843311
GO_LUNG_CELL_DIFFERENTIATION	17	-0.33715	-0.905118	0.590267	0.842956
GO_POSITIVE_REGULATION_OF_NEURON_PROJECTION_DEVELOPMENT	211	-0.218005	-0.904474	0.680995	0.843856
GO_REGULATION_OF_PROTEIN_LOCALIZATION_TO_PLASMA_MEMBRANE	75	-0.248436	-0.904296	0.616279	0.84372
GO_NEGATIVE_REGULATION_OF_PROTEIN_TYROSINE_KINASE_ACTIVITY	27	-0.301434	-0.904137	0.610429	0.84354
GO_EPITHELIAL_CELL_DIFFERENTIATION_INVOLVED_IN_KIDNEY_DEVELOPMENT	33	-0.286816	-0.903873	0.595101	0.843573
GO_RESPONSE_TO_CAMP	72	-0.250919	-0.902861	0.626667	0.845345
GO_QUINONE_BIOSYNTHETIC_PROCESS	16	-0.342653	-0.902706	0.562706	0.845138
GO_REGULATION_OF_SYNAPTIC_VESICLE_TRANSPORT	56	-0.261362	-0.901571	0.625337	0.847232
GO_MACROAUTOPHAGY	262	-0.212423	-0.899822	0.684735	0.850544
GO_REGULATION_OF_DENDRITE_DEVELOPMENT	113	-0.233006	-0.899004	0.652618	0.851811
GO_RNA_METHYLATION	69	-0.249984	-0.898891	0.630098	0.85151
GO_REGULATION_OF_BINDING	309	-0.211043	-0.898722	0.718033	0.85136
GO_INTRACELLULAR_RECEPTOR_SIGNALING_PATHWAY	223	-0.216714	-0.898601	0.691094	0.851089
GO_NEGATIVE_REGULATION_OF_INTRACELLULAR_STEROID_HORMONE_RECEPTOR_SIGNALING_PATHWAY	28	-0.296334	-0.898464	0.60625	0.850872
GO_INNER_EAR_MORPHOGENESIS	59	-0.260811	-0.898414	0.626168	0.850437
GO_PROTEIN_LOCALIZATION_TO_LYSOSOME	30	-0.300366	-0.89817	0.613003	0.850459
GO_POSITIVE_REGULATION_OF_INTRACELLULAR_TRANSPORT	178	-0.220827	-0.897906	0.679577	0.850519
GO_RESPONSE_TO_PEPTIDE_HORMONE	317	-0.211019	-0.897561	0.718582	0.850712
GO_SEX_DIFFERENTIATION	196	-0.219849	-0.896685	0.683411	0.852131
GO_NEGATIVE_REGULATION_OF_CYSTEINE_TYPE_ENDOPEPTIDASE_ACTIVITY	68	-0.254665	-0.896654	0.645074	0.851656
GO_CELLULAR_RESPONSE_TO_STEROID_HORMONE_STIMULUS	195	-0.217171	-0.896037	0.686321	0.852486
GO_C4_DICARBOXYLATE_TRANSPORT	16	-0.337992	-0.895632	0.585809	0.852858
GO_NEGATIVE_REGULATION_OF_SIGNALING_RECEPTOR_ACTIVITY	29	-0.297858	-0.895379	0.625378	0.852876
GO_ENDOTHELIAL_CELL_APOPTOTIC_PROCESS	42	-0.273251	-0.893563	0.622191	0.856454
GO_VENTRICULAR_CARDIAC_MUSCLE_TISSUE_DEVELOPMENT	38	-0.280454	-0.893088	0.631728	0.856965
GO_GLUCOSE_IMPORT	46	-0.269947	-0.892936	0.64507	0.856766
GO_HISTONE_H4_K5_ACETYLATION	16	-0.339947	-0.892909	0.621533	0.856291
GO_CARBOHYDRATE_METABOLIC_PROCESS	413	-0.206141	-0.892762	0.7628	0.856082
GO_MUSCLE_CONTRACTION	214	-0.216871	-0.892755	0.710884	0.85556
GO_REGULATION_OF_INTRACELLULAR_TRANSPORT	342	-0.207244	-0.892744	0.74482	0.855048
GO_BODY_FLUID_SECRETION	64	-0.253763	-0.892136	0.646154	0.855872
GO_COFACTOR_TRANSPORT	34	-0.285824	-0.89184	0.626292	0.856001
GO_FIBROBLAST_MIGRATION	37	-0.283138	-0.891835	0.604286	0.855478
GO_REGULATION_OF_HISTONE_MODIFICATION	119	-0.230126	-0.891235	0.673421	0.856239
GO_NEGATIVE_REGULATION_OF_TELOMERE_MAINTENANCE	32	-0.290819	-0.890281	0.610687	0.857794
GO_SKELETAL_SYSTEM_MORPHOGENESIS	170	-0.218711	-0.89016	0.689777	0.857521
GO_RESPONSE_TO_TUMOR_NECROSIS_FACTOR	228	-0.212746	-0.889611	0.715438	0.858228
GO_ACTIVIN_RECEPTOR_SIGNALING_PATHWAY	28	-0.300961	-0.889247	0.631083	0.858484
GO_SIGNAL_TRANSDUCTION_IN_ABSENCE_OF_LIGAND	59	-0.256372	-0.889097	0.622819	0.858264
GO_RIBONUCLEOSIDE_TRIPHOSPHATE_BIOSYNTHETIC_PROCESS	33	-0.289155	-0.888789	0.609329	0.858424
GO_REGULATION_OF_HORMONE_LEVELS	297	-0.207884	-0.888201	0.735165	0.85916
GO_CARDIAC_CHAMBER_DEVELOPMENT	130	-0.225372	-0.88805	0.691839	0.858985
GO_POSITIVE_REGULATION_OF_NEURON_DIFFERENTIATION	263	-0.21099	-0.887825	0.744395	0.858933
GO_REGULATION_OF_PROTEIN_SUMOYLATION	18	-0.327869	-0.887508	0.610455	0.85912
GO_ESTABLISHMENT_OF_CELL_POLARITY	116	-0.227589	-0.886866	0.673267	0.859957
GO_CELL_GROWTH	370	-0.206595	-0.886782	0.738197	0.859609
GO_NEGATIVE_REGULATION_OF_CELLULAR_CATABOLIC_PROCESS	201	-0.215565	-0.886776	0.696246	0.859088
GO_NEGATIVE_REGULATION_OF_CARDIOCYTE_DIFFERENTIATION	15	-0.337481	-0.885516	0.606109	0.861259
GO_EPITHELIAL_CELL_PROLIFERATION	292	-0.207043	-0.885042	0.729642	0.861777
GO_RESPONSE_TO_INORGANIC_SUBSTANCE	400	-0.203054	-0.885035	0.774023	0.861261
GO_CELLULAR_RESPONSE_TO_GLUCAGON_STIMULUS	17	-0.323376	-0.884955	0.618067	0.860884
GO_FACE_DEVELOPMENT	41	-0.270105	-0.884784	0.631268	0.860723
GO_EXTRACELLULAR_VESICLE_BIOGENESIS	19	-0.325624	-0.883284	0.627288	0.863421
GO_MODIFICATION_OF_MORPHOLOGY_OR_PHYSIOLOGY_OF_OTHER_ORGANISM	90	-0.237248	-0.883267	0.657068	0.862913
GO_REGULATION_OF_MITOCHONDRIAL_MEMBRANE_POTENTIAL	53	-0.256421	-0.882765	0.643357	0.863478
GO_MONOVALENT_INORGANIC_ANION_HOMEOSTASIS	15	-0.343677	-0.882689	0.626003	0.86312
GO_MODIFICATION_OF_MORPHOLOGY_OR_PHYSIOLOGY_OF_OTHER_ORGANISM_INVOLVED_IN_SYMBIOTIC_INTERACTION	78	-0.239942	-0.881126	0.684555	0.865976
GO_REGULATION_OF_MUSCLE_SYSTEM_PROCESS	155	-0.219838	-0.879607	0.710684	0.868755
GO_MODULATION_BY_SYMBIONT_OF_HOST_CELLULAR_PROCESS	23	-0.307006	-0.879097	0.624809	0.869325
GO_DETECTION_OF_MECHANICAL_STIMULUS	22	-0.308265	-0.879016	0.604396	0.868964
GO_NEGATIVE_REGULATION_OF_STRIATED_MUSCLE_CELL_APOPTOTIC_PROCESS	19	-0.323829	-0.878588	0.635484	0.869367
GO_REGULATION_OF_MICROTUBULE_POLYMERIZATION	38	-0.276313	-0.878474	0.636236	0.869078
GO_POSITIVE_REGULATION_OF_PEPTIDE_HORMONE_SECRETION	60	-0.251478	-0.878382	0.647697	0.868745
GO_RRNA_TRANSCRIPTION	28	-0.29315	-0.878238	0.614062	0.868523
GO_REGULATION_OF_MACROAUTOPHAGY	152	-0.219973	-0.878106	0.726846	0.868275
GO_REGULATION_OF_INTRINSIC_APOPTOTIC_SIGNALING_PATHWAY_BY_P53_CLASS_MEDIATOR	22	-0.309692	-0.877597	0.63706	0.868847
GO_REGULATION_OF_PROTEIN_MODIFICATION_BY_SMALL_PROTEIN_CONJUGATION_OR_REMOVAL	198	-0.213103	-0.877512	0.735023	0.868481
GO_PROTEIN_MATURATION	203	-0.211307	-0.87698	0.741282	0.869044
GO_NEGATIVE_REGULATION_OF_BLOOD_CIRCULATION	24	-0.300109	-0.876806	0.640523	0.868865
GO_SOMATIC_RECOMBINATION_OF_IMMUNOGLOBULIN_GENE_SEGMENTS	38	-0.274651	-0.876318	0.630528	0.869379
GO_EPITHELIAL_CELL_APOPTOTIC_PROCESS	78	-0.243462	-0.876037	0.661312	0.869417
GO_REGULATION_OF_CYSTEINE_TYPE_ENDOPEPTIDASE_ACTIVITY	173	-0.214649	-0.875843	0.731001	0.869256
GO_RESPONSE_TO_AMINE	27	-0.295353	-0.875796	0.633634	0.868814
GO_PROTEIN_DEMETHYLATION	28	-0.290598	-0.875714	0.637854	0.868457
GO_NEGATIVE_REGULATION_OF_MITOCHONDRION_ORGANIZATION	43	-0.26713	-0.875625	0.647059	0.868131
GO_OLFACTORY_LOBE_DEVELOPMENT	22	-0.303435	-0.874302	0.61882	0.870379
GO_POSITIVE_REGULATION_OF_RNA_SPLICING	31	-0.283462	-0.873764	0.642202	0.870967
GO_INTRACELLULAR_ESTROGEN_RECEPTOR_SIGNALING_PATHWAY	45	-0.267217	-0.87323	0.651622	0.871548
GO_POSITIVE_REGULATION_OF_HISTONE_DEACETYLATION	15	-0.331752	-0.872829	0.645412	0.87189
GO_TRANSCRIPTION_INITIATION_FROM_RNA_POLYMERASE_I_PROMOTER	34	-0.279032	-0.871541	0.655963	0.874073
GO_REGULATION_OF_GROWTH	496	-0.198177	-0.871456	0.820062	0.873719
GO_REGULATION_OF_BMP_SIGNALING_PATHWAY	60	-0.252025	-0.871403	0.675177	0.873302
GO_POSITIVE_REGULATION_OF_BIOMINERAL_TISSUE_DEVELOPMENT	33	-0.282301	-0.870349	0.651198	0.875008
GO_ENDOTHELIAL_CELL_PROLIFERATION	120	-0.223862	-0.869783	0.721687	0.87563
GO_POSITIVE_REGULATION_OF_DNA_REPAIR	57	-0.251862	-0.869699	0.672753	0.875274
GO_REGULATION_OF_CELLULAR_RESPONSE_TO_GROWTH_FACTOR_STIMULUS	209	-0.209251	-0.868928	0.751142	0.876371
GO_HISTONE_PHOSPHORYLATION	33	-0.281023	-0.868867	0.658358	0.875963
GO_ACTIN_FILAMENT_BASED_MOVEMENT	98	-0.22781	-0.868546	0.701121	0.876096
GO_NEGATIVE_REGULATION_OF_PEPTIDASE_ACTIVITY	135	-0.221808	-0.868453	0.726708	0.875768
GO_NEGATIVE_REGULATION_OF_JNK_CASCADE	29	-0.287438	-0.868329	0.646796	0.875496
GO_ORGANOPHOSPHATE_CATABOLIC_PROCESS	105	-0.230757	-0.868095	0.737437	0.875482
GO_SMALL_MOLECULE_CATABOLIC_PROCESS	287	-0.202715	-0.867989	0.769911	0.875166
GO_EAR_DEVELOPMENT	135	-0.218615	-0.867384	0.702439	0.875901
GO_REGULATION_OF_HEART_RATE_BY_CARDIAC_CONDUCTION	29	-0.287199	-0.866996	0.650986	0.876142
GO_HORMONE_MEDIATED_SIGNALING_PATHWAY	160	-0.214826	-0.866758	0.732121	0.876096
GO_REGULATION_OF_RELEASE_OF_CYTOCHROME_C_FROM_MITOCHONDRIA	39	-0.268529	-0.866751	0.660405	0.875575
GO_ACTIVATION_OF_ADENYLATE_CYCLASE_ACTIVITY	20	-0.309353	-0.866596	0.634584	0.875382
GO_AMINOGLYCAN_METABOLIC_PROCESS	103	-0.228592	-0.866478	0.704261	0.875103
GO_MESENCHYME_MORPHOGENESIS	42	-0.267179	-0.866077	0.661786	0.875454
GO_CARBOHYDRATE_DERIVATIVE_TRANSPORT	54	-0.250919	-0.866043	0.693706	0.874997
GO_BASEMENT_MEMBRANE_ORGANIZATION	20	-0.321563	-0.865958	0.657627	0.874658
GO_AMINOGLYCAN_BIOSYNTHETIC_PROCESS	90	-0.233478	-0.865681	0.688396	0.874703
GO_VESICLE_DOCKING_INVOLVED_IN_EXOCYTOSIS	41	-0.268699	-0.865465	0.674548	0.87462
GO_PATHWAY_RESTRICTED_SMAD_PROTEIN_PHOSPHORYLATION	46	-0.259499	-0.864781	0.668116	0.875521
GO_NEGATIVE_REGULATION_OF_RELEASE_OF_CYTOCHROME_C_FROM_MITOCHONDRIA	16	-0.326972	-0.864525	0.654424	0.875531
GO_PROTEIN_COMPLEX_OLIGOMERIZATION	389	-0.198297	-0.863876	0.803778	0.87635
GO_REGULATION_OF_MYELINATION	26	-0.29108	-0.863522	0.651235	0.876612
GO_NUCLEOSIDE_BISPHOSPHATE_METABOLIC_PROCESS	48	-0.260157	-0.863181	0.66712	0.876788
GO_POSITIVE_REGULATION_OF_PROTEIN_TARGETING_TO_MEMBRANE	27	-0.288293	-0.86291	0.674383	0.876804
GO_REGULATION_OF_SYNAPTIC_TRANSMISSION_GABAERGIC	19	-0.315656	-0.861373	0.652106	0.879426
GO_REGULATION_OF_PROTEIN_LOCALIZATION_TO_MEMBRANE	143	-0.2153	-0.860105	0.743961	0.881505
GO_SYNAPTIC_VESICLE_EXOCYTOSIS	78	-0.236337	-0.859841	0.696498	0.88156
GO_POSITIVE_REGULATION_OF_NUCLEOBASE_CONTAINING_COMPOUND_METABOLIC_PROCESS	198	-0.210974	-0.859403	0.75866	0.88195
GO_CELLULAR_COMPONENT_DISASSEMBLY	454	-0.197261	-0.858943	0.842932	0.882353
GO_SERTOLI_CELL_DIFFERENTIATION	16	-0.328326	-0.858795	0.630115	0.882144
GO_POSITIVE_REGULATION_OF_PROTEIN_DEPHOSPHORYLATION	37	-0.271159	-0.858777	0.655488	0.881648
GO_POSITIVE_REGULATION_OF_HORMONE_SECRETION	78	-0.231726	-0.858516	0.717914	0.881625
GO_NEGATIVE_REGULATION_OF_PROTEIN_ACETYLATION	18	-0.321427	-0.858503	0.638231	0.881126
GO_REGULATION_OF_FIBROBLAST_MIGRATION	29	-0.286704	-0.858306	0.668702	0.881007
GO_EAR_MORPHOGENESIS	72	-0.239332	-0.857885	0.708497	0.881356
GO_LYMPH_VESSEL_MORPHOGENESIS	17	-0.31788	-0.857751	0.613861	0.881089
GO_STEROID_BIOSYNTHETIC_PROCESS	123	-0.222017	-0.85754	0.745318	0.880972
GO_MATING	20	-0.312743	-0.856892	0.63981	0.881754
GO_REGULATION_OF_HISTONE_METHYLATION	52	-0.249692	-0.856512	0.694678	0.88203
GO_REGULATION_OF_TRANSMEMBRANE_RECEPTOR_PROTEIN_SERINE_THREONINE_KINASE_SIGNALING_PATHWAY	171	-0.213394	-0.855541	0.771598	0.883462
GO_REGULATION_OF_SYSTEM_PROCESS	342	-0.198227	-0.855256	0.835676	0.88355
GO_MICROTUBULE_DEPOLYMERIZATION	34	-0.268474	-0.854826	0.659701	0.883896
GO_POSITIVE_REGULATION_OF_VASCULAR_ENDOTHELIAL_GROWTH_FACTOR_PRODUCTION	25	-0.29238	-0.854345	0.678466	0.884338
GO_POSITIVE_REGULATION_OF_DENDRITE_DEVELOPMENT	59	-0.244022	-0.854036	0.715436	0.884454
GO_RELEASE_OF_CYTOCHROME_C_FROM_MITOCHONDRIA	47	-0.257499	-0.853879	0.700855	0.884273
GO_NEGATIVE_REGULATION_OF_NEURON_DIFFERENTIATION	162	-0.212224	-0.85291	0.778296	0.885688
GO_NEGATIVE_REGULATION_OF_CALCIUM_ION_TRANSPORT	39	-0.264387	-0.852067	0.674009	0.886879
GO_SINGLE_FERTILIZATION	57	-0.246656	-0.850275	0.706294	0.889956
GO_REGULATION_OF_EPIDERMIS_DEVELOPMENT	55	-0.248701	-0.849552	0.71875	0.890852
GO_MITOCHONDRIAL_DEPOLARIZATION	17	-0.321051	-0.849486	0.645425	0.890466
GO_REGULATION_OF_NEURON_DIFFERENTIATION	470	-0.193499	-0.849005	0.870833	0.890889
GO_WATER_HOMEOSTASIS	41	-0.261075	-0.848847	0.690332	0.890689
GO_REGULATION_OF_MICROTUBULE_POLYMERIZATION_OR_DEPOLYMERIZATION	61	-0.240983	-0.846615	0.728745	0.894709
GO_POSITIVE_REGULATION_OF_CELL_GROWTH	124	-0.215715	-0.84647	0.754902	0.894442
GO_OVULATION	16	-0.319875	-0.846444	0.636364	0.893966
GO_REGULATION_OF_POSTSYNAPTIC_MEMBRANE_POTENTIAL	69	-0.236894	-0.845465	0.716	0.89536
GO_VESICLE_DOCKING	56	-0.243122	-0.843925	0.707182	0.897862
GO_DNA_METHYLATION_OR_DEMETHYLATION	66	-0.237545	-0.843707	0.708926	0.897757
GO_CELLULAR_RESPONSE_TO_ABIOTIC_STIMULUS	248	-0.19908	-0.843403	0.81798	0.897832
GO_NEGATIVE_REGULATION_OF_INTRACELLULAR_TRANSPORT	53	-0.248355	-0.843221	0.736842	0.897671
GO_INTRINSIC_APOPTOTIC_SIGNALING_PATHWAY_IN_RESPONSE_TO_DNA_DAMAGE	88	-0.226223	-0.842809	0.727749	0.897934
GO_SCHWANN_CELL_DIFFERENTIATION	33	-0.26516	-0.842005	0.687776	0.898999
GO_REGULATION_OF_STEROID_BIOSYNTHETIC_PROCESS	68	-0.239762	-0.841537	0.729551	0.899379
GO_RESPONSE_TO_ESTRADIOL	90	-0.226035	-0.841301	0.749367	0.899306
GO_POSITIVE_REGULATION_OF_NEUROLOGICAL_SYSTEM_PROCESS	32	-0.269616	-0.841249	0.69462	0.89889
GO_SENSORY_PERCEPTION_OF_CHEMICAL_STIMULUS	29	-0.280729	-0.840314	0.696784	0.900198
GO_HISTONE_H3_K4_METHYLATION	47	-0.253109	-0.840141	0.713056	0.899997
GO_POSITIVE_REGULATION_OF_ENDOTHELIAL_CELL_MIGRATION	89	-0.224785	-0.84002	0.742105	0.899729
GO_ENERGY_HOMEOSTASIS	29	-0.277615	-0.839669	0.69219	0.899897
GO_CHONDROITIN_SULFATE_BIOSYNTHETIC_PROCESS	21	-0.300716	-0.838556	0.679811	0.901504
GO_NEGATIVE_REGULATION_OF_SMOOTHENED_SIGNALING_PATHWAY	23	-0.289508	-0.836144	0.687107	0.905616
GO_THIOESTER_BIOSYNTHETIC_PROCESS	42	-0.258373	-0.836089	0.735294	0.905193
GO_COVALENT_CHROMATIN_MODIFICATION	396	-0.194512	-0.8355	0.870934	0.905814
GO_REGULATION_OF_FAT_CELL_DIFFERENTIATION	100	-0.220261	-0.835445	0.77977	0.905395
GO_OUTFLOW_TRACT_MORPHOGENESIS	65	-0.235244	-0.835272	0.737997	0.905189
GO_ORGANELLE_FUSION	99	-0.218207	-0.834566	0.785805	0.906023
GO_REGULATION_OF_INSULIN_SECRETION	122	-0.213518	-0.834344	0.771144	0.905914
GO_REGULATION_OF_SYNAPTIC_VESICLE_CYCLE	80	-0.228404	-0.833868	0.768153	0.90628
GO_CELLULAR_RESPONSE_TO_ESTRADIOL_STIMULUS	23	-0.290692	-0.833027	0.679675	0.907384
GO_NEPHRON_EPITHELIUM_DEVELOPMENT	81	-0.229381	-0.832987	0.767717	0.906925
GO_RESPONSE_TO_MUSCLE_ACTIVITY	18	-0.310316	-0.832883	0.690878	0.906598
GO_REPRODUCTIVE_BEHAVIOR	17	-0.305999	-0.832674	0.696629	0.906475
GO_POSITIVE_REGULATION_OF_NEURON_APOPTOTIC_PROCESS	43	-0.249763	-0.832593	0.746228	0.906122
GO_NEGATIVE_REGULATION_OF_FAT_CELL_DIFFERENTIATION	38	-0.261593	-0.832557	0.701357	0.905668
GO_REGULATION_OF_GENE_EXPRESSION_BY_GENETIC_IMPRINTING	15	-0.320758	-0.831876	0.689145	0.90646
GO_POSITIVE_REGULATION_OF_PROTEIN_LOCALIZATION_TO_CELL_PERIPHERY	49	-0.245985	-0.831144	0.719888	0.907367
GO_PROTEIN_KINASE_A_SIGNALING	21	-0.297766	-0.830209	0.70347	0.908616
GO_RESPONSE_TO_MORPHINE	20	-0.300499	-0.830094	0.691339	0.908316
GO_REGULATION_OF_EPIDERMAL_GROWTH_FACTOR_ACTIVATED_RECEPTOR_ACTIVITY	24	-0.284141	-0.829893	0.683258	0.908169
GO_CALCIUM_DEPENDENT_CELL_CELL_ADHESION_VIA_PLASMA_MEMBRANE_CELL_ADHESION_MOLECULES	25	-0.282714	-0.829835	0.694309	0.907756
GO_ENDODERM_DEVELOPMENT	58	-0.239509	-0.829345	0.749648	0.908183
GO_REGULATION_OF_SPROUTING_ANGIOGENESIS	64	-0.237963	-0.829259	0.74966	0.907796
GO_CENTRAL_NERVOUS_SYSTEM_NEURON_AXONOGENESIS	29	-0.269648	-0.829215	0.711278	0.907352
GO_REGULATION_OF_ENDOTHELIAL_CELL_CHEMOTAXIS	18	-0.30508	-0.828336	0.692058	0.908515
GO_COCHLEA_MORPHOGENESIS	15	-0.318339	-0.828274	0.692177	0.908115
GO_POSITIVE_REGULATION_OF_EPIDERMIS_DEVELOPMENT	26	-0.280529	-0.828223	0.708268	0.907686
GO_REGULATION_OF_ENDOCRINE_PROCESS	21	-0.298055	-0.82754	0.714058	0.908451
GO_POSITIVE_REGULATION_OF_CYSTEINE_TYPE_ENDOPEPTIDASE_ACTIVITY	107	-0.220083	-0.825843	0.77665	0.91115
GO_RESPONSE_TO_AMINO_ACID	88	-0.221602	-0.825779	0.778058	0.910745
GO_POSITIVE_REGULATION_OF_BINDING	160	-0.205454	-0.825476	0.818182	0.91077
GO_NEGATIVE_REGULATION_OF_SIGNAL_TRANSDUCTION_BY_P53_CLASS_MEDIATOR	24	-0.287273	-0.82454	0.68949	0.911988
GO_AGING	238	-0.198295	-0.824448	0.829079	0.911629
GO_RESPONSE_TO_RETINOIC_ACID	72	-0.229554	-0.824346	0.754717	0.911294
GO_DETECTION_OF_VISIBLE_LIGHT	21	-0.292327	-0.824263	0.695935	0.910928
GO_POSITIVE_REGULATION_OF_CHROMATIN_ORGANIZATION	87	-0.224061	-0.822739	0.793734	0.913259
GO_PHOTORECEPTOR_CELL_MAINTENANCE	22	-0.281887	-0.822491	0.710863	0.913192
GO_POSITIVE_REGULATION_OF_RESPONSE_TO_ENDOPLASMIC_RETICULUM_STRESS	35	-0.260391	-0.82241	0.704412	0.912816
GO_REGULATION_OF_VASCULAR_ENDOTHELIAL_GROWTH_FACTOR_RECEPTOR_SIGNALING_PATHWAY	28	-0.274398	-0.822354	0.701095	0.912392
GO_HISTONE_H3_K9_METHYLATION	32	-0.267194	-0.82162	0.724595	0.913287
GO_RESPONSE_TO_STEROID_HORMONE	285	-0.192374	-0.820907	0.857768	0.91408
GO_RNA_DESTABILIZATION	28	-0.272686	-0.820152	0.757848	0.91496
GO_ANGIOGENESIS_INVOLVED_IN_WOUND_HEALING	17	-0.307729	-0.819794	0.706924	0.915079
GO_REGULATION_OF_HEART_MORPHOGENESIS	29	-0.270688	-0.819259	0.732006	0.915516
GO_HAIR_CELL_DIFFERENTIATION	23	-0.283551	-0.819251	0.704918	0.915004
GO_REGULATION_OF_PROGRAMMED_NECROTIC_CELL_DEATH	16	-0.309094	-0.818816	0.683502	0.91527
GO_REGULATION_OF_TYPE_I_INTERFERON_MEDIATED_SIGNALING_PATHWAY	28	-0.271099	-0.817993	0.712557	0.916222
GO_REGULATION_OF_LIPID_BIOSYNTHETIC_PROCESS	139	-0.206132	-0.816294	0.831106	0.918726
GO_INSULIN_SECRETION	140	-0.204265	-0.814951	0.822619	0.92065
GO_STEROID_HORMONE_MEDIATED_SIGNALING_PATHWAY	144	-0.204516	-0.813923	0.827503	0.921957
GO_REGULATION_OF_FATTY_ACID_BIOSYNTHETIC_PROCESS	34	-0.263153	-0.813778	0.715789	0.921703
GO_POSITIVE_REGULATION_OF_PROTEIN_DEACETYLATION	18	-0.3013	-0.813482	0.694943	0.92169
GO_CARBOHYDRATE_CATABOLIC_PROCESS	146	-0.204666	-0.813253	0.821678	0.921548
GO_REGULATION_OF_HETEROTYPIC_CELL_CELL_ADHESION	19	-0.296418	-0.813245	0.699346	0.92104
GO_RESPONSE_TO_PROGESTERONE	30	-0.272753	-0.813189	0.737008	0.920621
GO_NEGATIVE_REGULATION_OF_PROTEIN_COMPLEX_DISASSEMBLY	56	-0.237162	-0.812481	0.77193	0.921338
GO_NEGATIVE_REGULATION_OF_CELLULAR_PROTEIN_LOCALIZATION	88	-0.216971	-0.810767	0.792839	0.923892
GO_ORGANELLE_MEMBRANE_FUSION	77	-0.222559	-0.809188	0.799197	0.926119
GO_EPITHELIAL_TUBE_BRANCHING_INVOLVED_IN_LUNG_MORPHOGENESIS	23	-0.282136	-0.809172	0.728707	0.925624
GO_CHLORIDE_TRANSPORT	55	-0.235699	-0.809161	0.777311	0.925118
GO_REGULATION_OF_CYTOPLASMIC_TRANSPORT	22	-0.282128	-0.80866	0.723856	0.925508
GO_VASCULAR_SMOOTH_MUSCLE_CELL_DIFFERENTIATION	21	-0.286801	-0.808536	0.73839	0.92521
GO_NEGATIVE_REGULATION_OF_VIRAL_TRANSCRIPTION	19	-0.28918	-0.808033	0.714511	0.92556
GO_LYMPHOID_PROGENITOR_CELL_DIFFERENTIATION	16	-0.31321	-0.80784	0.705696	0.925382
GO_DEVELOPMENTAL_GROWTH	476	-0.184826	-0.806231	0.913721	0.927612
GO_NEGATIVE_REGULATION_OF_PROTEASOMAL_UBIQUITIN_DEPENDENT_PROTEIN_CATABOLIC_PROCESS	27	-0.269373	-0.805649	0.772114	0.928068
GO_TRANSMEMBRANE_RECEPTOR_PROTEIN_SERINE_THREONINE_KINASE_SIGNALING_PATHWAY	253	-0.190792	-0.805174	0.876265	0.928387
GO_NEGATIVE_REGULATION_OF_INTRINSIC_APOPTOTIC_SIGNALING_PATHWAY_IN_RESPONSE_TO_DNA_DAMAGE	27	-0.270164	-0.804838	0.745938	0.928484
GO_ORGANISM_EMERGENCE_FROM_PROTECTIVE_STRUCTURE	17	-0.303214	-0.804414	0.725275	0.928686
GO_CARDIAC_SEPTUM_MORPHOGENESIS	63	-0.22603	-0.804109	0.793829	0.928698
GO_REGULATION_OF_DNA_RECOMBINATION	79	-0.219983	-0.803378	0.796	0.929462
GO_POSITIVE_REGULATION_OF_EPITHELIAL_CELL_DIFFERENTIATION	38	-0.249997	-0.802693	0.76259	0.930131
GO_POSITIVE_REGULATION_OF_EPITHELIAL_CELL_PROLIFERATION	145	-0.200741	-0.802212	0.845694	0.930428
GO_POSITIVE_REGULATION_OF_RELEASE_OF_CYTOCHROME_C_FROM_MITOCHONDRIA	24	-0.273593	-0.801364	0.757433	0.931353
GO_ONE_CARBON_METABOLIC_PROCESS	21	-0.285336	-0.800751	0.761468	0.931897
GO_REGULATION_OF_CELL_DIVISION	125	-0.205621	-0.800682	0.837267	0.931498
GO_CELLULAR_RESPONSE_TO_REACTIVE_OXYGEN_SPECIES	137	-0.203924	-0.80036	0.851288	0.931549
GO_STRIATED_MUSCLE_CELL_PROLIFERATION	50	-0.234069	-0.798849	0.796919	0.933634
GO_NEGATIVE_REGULATION_OF_NOTCH_SIGNALING_PATHWAY	33	-0.256537	-0.79836	0.765051	0.933966
GO_PROTEIN_HOMOOLIGOMERIZATION	231	-0.189987	-0.798281	0.900224	0.933595
GO_MITOTIC_CHROMOSOME_CONDENSATION	16	-0.302604	-0.797122	0.732558	0.935084
GO_RENAL_WATER_HOMEOSTASIS	23	-0.2735	-0.796878	0.742991	0.934959
GO_MUSCLE_FIBER_DEVELOPMENT	46	-0.239969	-0.796711	0.795827	0.934713
GO_INNER_EAR_AUDITORY_RECEPTOR_CELL_DIFFERENTIATION	19	-0.28894	-0.796565	0.745192	0.934436
GO_NCRNA_TRANSCRIPTION	97	-0.21251	-0.796014	0.828309	0.93483
GO_REGULATION_OF_EXTRINSIC_APOPTOTIC_SIGNALING_PATHWAY	128	-0.202392	-0.79491	0.834532	0.936194
GO_REGULATION_OF_CELLULAR_PROTEIN_LOCALIZATION	438	-0.18197	-0.794849	0.942166	0.935776
GO_REGULATION_OF_PROTEIN_TARGETING	69	-0.2233	-0.794268	0.791892	0.936257
GO_POSITIVE_REGULATION_OF_FAT_CELL_DIFFERENTIATION	49	-0.235535	-0.793295	0.784153	0.937346
GO_SEMI_LUNAR_VALVE_DEVELOPMENT	35	-0.253546	-0.793253	0.753488	0.936889
GO_VITAMIN_TRANSPORT	20	-0.286664	-0.793142	0.740158	0.936545
GO_BLOOD_VESSEL_ENDOTHELIAL_CELL_PROLIFERATION_INVOLVED_IN_SPROUTING_ANGIOGENESIS	22	-0.28012	-0.793101	0.733017	0.936097
GO_NEURAL_PRECURSOR_CELL_PROLIFERATION	99	-0.208492	-0.79304	0.833333	0.935666
GO_POSITIVE_REGULATION_OF_MULTICELLULAR_ORGANISM_GROWTH	20	-0.28556	-0.792855	0.756757	0.935455
GO_IRON_ION_HOMEOSTASIS	69	-0.222745	-0.791901	0.81745	0.936515
GO_RESPIRATORY_GASEOUS_EXCHANGE	43	-0.240198	-0.791712	0.766423	0.936317
GO_NEGATIVE_REGULATION_OF_CELLULAR_SENESCENCE	18	-0.289303	-0.791647	0.742301	0.935897
GO_LUNG_EPITHELIUM_DEVELOPMENT	28	-0.266888	-0.790479	0.771605	0.937272
GO_CHONDROITIN_SULFATE_PROTEOGLYCAN_BIOSYNTHETIC_PROCESS	23	-0.273108	-0.790078	0.74103	0.937394
GO_SARCOPLASMIC_RETICULUM_CALCIUM_ION_TRANSPORT	22	-0.282659	-0.789594	0.755556	0.937654
GO_CELL_CELL_JUNCTION_ORGANIZATION	121	-0.203191	-0.788451	0.868521	0.938961
GO_HEART_DEVELOPMENT	424	-0.180449	-0.788204	0.93129	0.938864
GO_REGULATION_OF_SODIUM_ION_TRANSMEMBRANE_TRANSPORT	49	-0.234835	-0.787994	0.778386	0.938687
GO_POSITIVE_REGULATION_OF_INSULIN_SECRETION_INVOLVED_IN_CELLULAR_RESPONSE_TO_GLUCOSE_STIMULUS	22	-0.27795	-0.787436	0.748092	0.939057
GO_POSITIVE_CHEMOTAXIS	45	-0.238779	-0.78727	0.793673	0.938803
GO_MONOSACCHARIDE_METABOLIC_PROCESS	121	-0.203265	-0.78705	0.858911	0.938662
GO_MIRNA_MEDIATED_INHIBITION_OF_TRANSLATION	15	-0.306893	-0.787021	0.755137	0.938196
GO_REGULATION_OF_PROTEIN_COMPLEX_DISASSEMBLY	89	-0.211843	-0.786463	0.821883	0.938591
GO_POSITIVE_REGULATION_OF_TOR_SIGNALING	33	-0.255501	-0.784989	0.788012	0.940407
GO_MICROTUBULE_BUNDLE_FORMATION	56	-0.232846	-0.783918	0.802469	0.941603
GO_REGULATION_OF_AUTOPHAGOSOME_ASSEMBLY	30	-0.256926	-0.783496	0.749618	0.941726
GO_CRANIAL_SKELETAL_SYSTEM_DEVELOPMENT	49	-0.233559	-0.783457	0.787172	0.941268
GO_MULTI_MULTICELLULAR_ORGANISM_PROCESS	145	-0.199124	-0.782908	0.862275	0.941634
GO_RESPONSE_TO_CORTICOSTEROID	117	-0.200935	-0.781738	0.873418	0.942974
GO_MITOPHAGY	20	-0.284369	-0.781729	0.767947	0.942474
GO_RESPONSE_TO_ANESTHETIC	39	-0.245783	-0.78088	0.789474	0.943248
GO_PROTEIN_KINASE_C_SIGNALING	20	-0.278793	-0.779583	0.75748	0.944783
GO_ADIPOSE_TISSUE_DEVELOPMENT	32	-0.248696	-0.778705	0.764095	0.945623
GO_GOLGI_ORGANIZATION	119	-0.197891	-0.778697	0.854501	0.945115
GO_POSITIVE_REGULATION_OF_BMP_SIGNALING_PATHWAY	24	-0.267728	-0.778533	0.749235	0.944843
GO_PROTEIN_K63_LINKED_UBIQUITINATION	41	-0.244842	-0.778331	0.788595	0.944639
GO_PROTEIN_DEPOLYMERIZATION	84	-0.212494	-0.77776	0.856959	0.945014
GO_NUCLEOSIDE_BISPHOSPHATE_BIOSYNTHETIC_PROCESS	56	-0.22423	-0.777592	0.815934	0.944755
GO_REGULATION_OF_MITOCHONDRION_ORGANIZATION	151	-0.195913	-0.777103	0.879475	0.944974
GO_PHOSPHATIDYLCHOLINE_BIOSYNTHETIC_PROCESS	29	-0.261893	-0.775935	0.788991	0.946212
GO_AXONEME_ASSEMBLY	31	-0.250983	-0.775898	0.789713	0.945754
GO_SECRETORY_GRANULE_ORGANIZATION	23	-0.268795	-0.774412	0.761453	0.947506
GO_POSITIVE_REGULATION_OF_GENE_EXPRESSION_EPIGENETIC	55	-0.224856	-0.773811	0.820584	0.947863
GO_SPINAL_CORD_MOTOR_NEURON_DIFFERENTIATION	16	-0.294124	-0.773407	0.765203	0.947988
GO_CELLULAR_CARBOHYDRATE_CATABOLIC_PROCESS	35	-0.239807	-0.773219	0.810893	0.94777
GO_PEPTIDE_CROSS_LINKING	16	-0.283432	-0.77289	0.740741	0.947752
GO_CARTILAGE_MORPHOGENESIS	21	-0.278092	-0.770836	0.770932	0.950332
GO_REGULATION_OF_ERBB_SIGNALING_PATHWAY	75	-0.213669	-0.770685	0.844121	0.950034
GO_STEM_CELL_PROLIFERATION	83	-0.208199	-0.769462	0.849734	0.951372
GO_ORGANIC_CATION_TRANSPORT	20	-0.283685	-0.769331	0.775701	0.951055
GO_CELLULAR_RESPONSE_TO_VIRUS	40	-0.239468	-0.769075	0.828571	0.950914
GO_POSITIVE_REGULATION_OF_VASCULAR_SMOOTH_MUSCLE_CELL_PROLIFERATION	34	-0.248112	-0.768954	0.806167	0.950575
GO_DNA_MODIFICATION	85	-0.208209	-0.768632	0.851802	0.950544
GO_NEGATIVE_REGULATION_OF_EXTRINSIC_APOPTOTIC_SIGNALING_PATHWAY_VIA_DEATH_DOMAIN_RECEPTORS	27	-0.259271	-0.768246	0.800586	0.950604
GO_ATP_HYDROLYSIS_COUPLED_TRANSMEMBRANE_TRANSPORT	22	-0.270053	-0.76806	0.775806	0.950349
GO_COENZYME_METABOLIC_PROCESS	205	-0.185174	-0.767192	0.910776	0.951093
GO_MAMMARY_GLAND_EPITHELIAL_CELL_PROLIFERATION	24	-0.263323	-0.767078	0.77381	0.950739
GO_DNA_RECOMBINATION	222	-0.183995	-0.766917	0.942503	0.950454
GO_POSITIVE_REGULATION_OF_PROTEIN_LOCALIZATION_TO_MEMBRANE	95	-0.203087	-0.766833	0.872773	0.95006
GO_REPLICATION_FORK_PROCESSING	27	-0.259493	-0.766263	0.790274	0.950399
GO_PROTEIN_LOCALIZATION_TO_CHROMATIN	27	-0.254505	-0.76613	0.806202	0.95007
GO_POSITIVE_REGULATION_OF_DNA_METABOLIC_PROCESS	135	-0.195502	-0.765399	0.892086	0.950633
GO_SENSORY_PERCEPTION_OF_TASTE	15	-0.295321	-0.765293	0.766556	0.950276
GO_POSITIVE_REGULATION_OF_TRANSCRIPTION_FROM_RNA_POLYMERASE_II_PROMOTER_INVOLVED_IN_CELLULAR_RESPONSE_TO_CHEMICAL_STIMULUS	19	-0.279578	-0.764847	0.779553	0.950431
GO_OSSIFICATION	291	-0.178516	-0.764452	0.945916	0.950505
GO_VENTRICULAR_SEPTUM_DEVELOPMENT	60	-0.217853	-0.762226	0.843407	0.953232
GO_ARP2_3_COMPLEX_MEDIATED_ACTIN_NUCLEATION	30	-0.250601	-0.761878	0.807576	0.953187
GO_COFACTOR_METABOLIC_PROCESS	331	-0.177233	-0.761813	0.946855	0.952759
GO_RESPONSE_TO_INTERLEUKIN_7	33	-0.244736	-0.761453	0.807175	0.952773
GO_ANTIMICROBIAL_HUMORAL_RESPONSE	42	-0.234456	-0.760761	0.830904	0.953265
GO_MESODERM_DEVELOPMENT	83	-0.205935	-0.760712	0.866048	0.952821
GO_PEROXISOMAL_TRANSPORT	58	-0.21964	-0.759504	0.841184	0.954047
GO_CELLULAR_RESPONSE_TO_MECHANICAL_STIMULUS	65	-0.215462	-0.758764	0.84478	0.954536
GO_MULTICELLULAR_ORGANISMAL_SIGNALING	106	-0.198662	-0.758168	0.886675	0.954832
GO_SPLEEN_DEVELOPMENT	29	-0.250667	-0.757405	0.801262	0.95543
GO_STRESS_GRANULE_ASSEMBLY	15	-0.284444	-0.756284	0.797386	0.956477
GO_ACTION_POTENTIAL	80	-0.208114	-0.756123	0.884668	0.95618
GO_CELLULAR_COMPONENT_DISASSEMBLY_INVOLVED_IN_EXECUTION_PHASE_OF_APOPTOSIS	26	-0.256188	-0.755651	0.782609	0.956277
GO_ENERGY_COUPLED_PROTON_TRANSMEMBRANE_TRANSPORT_AGAINST_ELECTROCHEMICAL_GRADIENT	22	-0.263946	-0.755326	0.791401	0.956198
GO_NEGATIVE_REGULATION_OF_BINDING	129	-0.193306	-0.754941	0.896261	0.956214
GO_POSITIVE_REGULATION_OF_INTRACELLULAR_PROTEIN_TRANSPORT	133	-0.192477	-0.753776	0.909756	0.957263
GO_SNRNA_3_END_PROCESSING	16	-0.288823	-0.7534	0.774245	0.957258
GO_EMBRYONIC_HEMOPOIESIS	17	-0.282843	-0.753342	0.800659	0.956827
GO_REGULATION_OF_MAMMARY_GLAND_EPITHELIAL_CELL_PROLIFERATION	15	-0.288312	-0.752908	0.782214	0.956909
GO_POSITIVE_REGULATION_OF_VASOCONSTRICTION	15	-0.28722	-0.752552	0.797054	0.956865
GO_HISTONE_H3_ACETYLATION	51	-0.220244	-0.752374	0.857534	0.956605
GO_REGULATION_OF_VASOCONSTRICTION	30	-0.247553	-0.751653	0.823617	0.957071
GO_HISTONE_H2A_ACETYLATION	15	-0.29102	-0.751457	0.785374	0.95684
GO_NEURON_FATE_COMMITMENT	24	-0.259585	-0.750895	0.795069	0.957091
GO_EMBRYONIC_CRANIAL_SKELETON_MORPHOGENESIS	35	-0.235811	-0.749057	0.848889	0.959067
GO_CATECHOLAMINE_SECRETION	24	-0.258421	-0.748263	0.809309	0.959569
GO_POSITIVE_REGULATION_OF_CELLULAR_AMIDE_METABOLIC_PROCESS	123	-0.193107	-0.746816	0.919018	0.960966
GO_REGULATION_OF_CARBOHYDRATE_METABOLIC_PROCESS	159	-0.18624	-0.745856	0.938169	0.961684
GO_FATTY_ACID_BETA_OXIDATION	64	-0.210368	-0.74585	0.868	0.961183
GO_RESPONSE_TO_MINERALOCORTICOID	22	-0.260294	-0.745603	0.802774	0.960977
GO_REGULATION_OF_ACTION_POTENTIAL	36	-0.239111	-0.744114	0.845113	0.962381
GO_NEGATIVE_REGULATION_OF_GLIOGENESIS	22	-0.257686	-0.74409	0.818182	0.961899
GO_NEGATIVE_REGULATION_OF_CELL_AGING	22	-0.256361	-0.743191	0.826833	0.96257
GO_RIBOSE_PHOSPHATE_BIOSYNTHETIC_PROCESS	131	-0.190311	-0.743039	0.920828	0.962263
GO_PEPTIDYL_LYSINE_METHYLATION	105	-0.192209	-0.741453	0.918136	0.963801
GO_ORGANELLE_TRANSPORT_ALONG_MICROTUBULE	71	-0.208933	-0.739036	0.8722	0.966402
GO_REGULATION_OF_TRANSLATIONAL_FIDELITY	16	-0.280305	-0.738763	0.807628	0.966212
GO_RESPONSE_TO_XENOBIOTIC_STIMULUS	166	-0.18247	-0.737996	0.939467	0.966665
GO_REGULATION_OF_INTRACELLULAR_PROTEIN_TRANSPORT	203	-0.179105	-0.737441	0.954076	0.966875
GO_EXTRACELLULAR_MATRIX_ASSEMBLY	23	-0.256801	-0.736794	0.833595	0.967198
GO_PROTEIN_LOCALIZATION_TO_VACUOLE	49	-0.217595	-0.736237	0.865057	0.967369
GO_ESTABLISHMENT_OF_SPINDLE_ORIENTATION	25	-0.25098	-0.734255	0.818605	0.96931
GO_REGULATION_OF_MUSCLE_CONTRACTION	97	-0.193106	-0.73306	0.909784	0.970222
GO_REGULATION_OF_MITOPHAGY	15	-0.283109	-0.732243	0.799337	0.970695
GO_PROTEIN_ACETYLATION	168	-0.181804	-0.732142	0.949112	0.970299
GO_REGULATION_OF_MUSCLE_ADAPTATION	68	-0.206195	-0.732031	0.87741	0.969926
GO_NEGATIVE_REGULATION_OF_ORGANELLE_ASSEMBLY	30	-0.238615	-0.730655	0.842424	0.971061
GO_GLUCAN_METABOLIC_PROCESS	54	-0.214397	-0.728847	0.877309	0.972648
GO_TISSUE_REGENERATION	39	-0.226075	-0.7287	0.870015	0.972309
GO_REGULATION_OF_PROTEIN_DEPOLYMERIZATION	64	-0.205793	-0.72863	0.903581	0.971871
GO_REGULATION_OF_SMOOTHENED_SIGNALING_PATHWAY	63	-0.208534	-0.727887	0.885333	0.97225
GO_RIBONUCLEOPROTEIN_COMPLEX_DISASSEMBLY	15	-0.282894	-0.727134	0.812069	0.972605
GO_EMBRYONIC_SKELETAL_SYSTEM_DEVELOPMENT	84	-0.200023	-0.726982	0.908123	0.972274
GO_CELLULAR_RESPONSE_TO_STEROL	17	-0.276609	-0.726612	0.817886	0.972188
GO_NEGATIVE_REGULATION_OF_PROTEIN_MODIFICATION_BY_SMALL_PROTEIN_CONJUGATION_OR_REMOVAL	71	-0.20189	-0.725492	0.895805	0.972986
GO_EMBRYONIC_ORGAN_MORPHOGENESIS	195	-0.177201	-0.723806	0.966705	0.974399
GO_POSITIVE_REGULATION_OF_TRANSFORMING_GROWTH_FACTOR_BETA_PRODUCTION	15	-0.274781	-0.723762	0.813614	0.973941
GO_ENDOTHELIUM_DEVELOPMENT	95	-0.195541	-0.723356	0.92238	0.973892
GO_NEGATIVE_REGULATION_OF_REACTIVE_OXYGEN_SPECIES_METABOLIC_PROCESS	21	-0.254565	-0.722874	0.83119	0.973906
GO_SULFUR_COMPOUND_TRANSPORT	32	-0.231976	-0.722823	0.863095	0.973445
GO_EXTRINSIC_APOPTOTIC_SIGNALING_PATHWAY	183	-0.176741	-0.72271	0.960784	0.973078
GO_MICROTUBULE_POLYMERIZATION_OR_DEPOLYMERIZATION	89	-0.195415	-0.721832	0.921156	0.973533
GO_PEPTIDYL_LYSINE_ACETYLATION	145	-0.179844	-0.721064	0.961104	0.973876
GO_MICROTUBULE_ANCHORING	25	-0.246317	-0.7203	0.842105	0.974221
GO_NEGATIVE_REGULATION_OF_MACROAUTOPHAGY	28	-0.241192	-0.718951	0.856925	0.975215
GO_REGULATION_OF_INTRINSIC_APOPTOTIC_SIGNALING_PATHWAY_IN_RESPONSE_TO_DNA_DAMAGE	34	-0.229727	-0.718218	0.869499	0.975507
GO_CELL_JUNCTION_ORGANIZATION	246	-0.171581	-0.717885	0.978818	0.97535
GO_COENZYME_BIOSYNTHETIC_PROCESS	122	-0.185954	-0.717705	0.937738	0.975025
GO_EXECUTION_PHASE_OF_APOPTOSIS	55	-0.208362	-0.716885	0.889045	0.975421
GO_REGULATION_OF_COFACTOR_METABOLIC_PROCESS	28	-0.235163	-0.715201	0.836449	0.976716
GO_REGULATION_OF_MITOCHONDRIAL_FISSION	20	-0.25721	-0.714608	0.822951	0.976841
GO_REGULATION_OF_CELL_MATRIX_ADHESION	104	-0.186315	-0.714007	0.93742	0.97699
GO_REGULATION_OF_VASCULAR_PERMEABILITY	26	-0.241147	-0.713277	0.877193	0.977248
GO_DNA_CATABOLIC_PROCESS_ENDONUCLEOLYTIC	23	-0.248358	-0.713152	0.865931	0.976886
GO_POSITIVE_REGULATION_OF_EPITHELIAL_TO_MESENCHYMAL_TRANSITION	43	-0.220014	-0.713121	0.892704	0.976413
GO_NEGATIVE_REGULATION_OF_EXTRINSIC_APOPTOTIC_SIGNALING_PATHWAY	85	-0.196008	-0.712916	0.92607	0.976134
GO_ACTIVATION_OF_PROTEIN_KINASE_A_ACTIVITY	15	-0.272031	-0.711465	0.815009	0.977154
GO_SNRNA_TRANSCRIPTION	68	-0.200761	-0.711131	0.923584	0.977006
GO_REGULATION_OF_POSITIVE_CHEMOTAXIS	17	-0.266086	-0.710251	0.842282	0.977405
GO_HEPATICOBILIARY_SYSTEM_DEVELOPMENT	115	-0.182148	-0.708327	0.944304	0.978847
GO_REGULATION_OF_TRANSLATIONAL_ELONGATION	16	-0.27157	-0.707407	0.847682	0.979278
GO_NEGATIVE_REGULATION_OF_RESPONSE_TO_CYTOKINE_STIMULUS	42	-0.218583	-0.70646	0.891817	0.979716
GO_CELLULAR_RESPONSE_TO_XENOBIOTIC_STIMULUS	96	-0.18704	-0.706363	0.932312	0.979308
GO_DETECTION_OF_MECHANICAL_STIMULUS_INVOLVED_IN_SENSORY_PERCEPTION	15	-0.274649	-0.706029	0.846774	0.979135
GO_NEGATIVE_REGULATION_OF_CHROMOSOME_ORGANIZATION	123	-0.180504	-0.705179	0.962333	0.979478
GO_TRANSCRIPTION_PREINITIATION_COMPLEX_ASSEMBLY	39	-0.217374	-0.704762	0.895803	0.979376
GO_NEGATIVE_REGULATION_OF_ORGANELLE_ORGANIZATION	308	-0.164483	-0.704604	0.994541	0.979029
GO_ENDOSOME_ORGANIZATION	67	-0.196779	-0.703059	0.923077	0.980021
GO_REGULATION_OF_PROTEIN_DEACETYLATION	33	-0.225157	-0.702929	0.864035	0.979641
GO_DNA_DOUBLE_STRAND_BREAK_PROCESSING	21	-0.248935	-0.70287	0.87011	0.979193
GO_AXONEMAL_DYNEIN_COMPLEX_ASSEMBLY	16	-0.267839	-0.702493	0.819277	0.979065
GO_REGULATION_OF_PROTEIN_TARGETING_TO_MITOCHONDRION	38	-0.219773	-0.702221	0.886191	0.978824
GO_RECEPTOR_RECYCLING	24	-0.240862	-0.701991	0.878694	0.978541
GO_MYELOID_LEUKOCYTE_CYTOKINE_PRODUCTION	27	-0.237218	-0.701172	0.858476	0.978813
GO_REGULATION_OF_MULTICELLULAR_ORGANISM_GROWTH	50	-0.206145	-0.700729	0.913223	0.978742
GO_REGULATION_OF_CELL_JUNCTION_ASSEMBLY	82	-0.189249	-0.700527	0.935743	0.978438
GO_GASTRULATION	136	-0.178721	-0.700476	0.960573	0.977992
GO_CENTRIOLE_ASSEMBLY	35	-0.221688	-0.700211	0.882443	0.977726
GO_SPINAL_CORD_DEVELOPMENT	60	-0.202275	-0.699745	0.924476	0.977641
GO_SPINDLE_LOCALIZATION	37	-0.217133	-0.699695	0.901325	0.977189
GO_POSITIVE_REGULATION_OF_PROTEIN_TARGETING_TO_MITOCHONDRION	29	-0.233506	-0.69873	0.864407	0.977619
GO_RHYTHMIC_BEHAVIOR	22	-0.247358	-0.697746	0.84689	0.978063
GO_CILIUM_ORGANIZATION	291	-0.165994	-0.69773	0.99235	0.977572
GO_CARDIAC_MUSCLE_CELL_ACTION_POTENTIAL_INVOLVED_IN_CONTRACTION	37	-0.214289	-0.695454	0.881306	0.979172
GO_NEGATIVE_REGULATION_OF_CARDIAC_MUSCLE_TISSUE_GROWTH	17	-0.258465	-0.694334	0.860465	0.979723
GO_TRANSCRIPTION_ELONGATION_FROM_RNA_POLYMERASE_I_PROMOTER	29	-0.232132	-0.693721	0.889226	0.979739
GO_PROTEIN_ACYLATION	205	-0.167676	-0.692832	0.978385	0.98006
GO_RESPONSE_TO_GLUCAGON	26	-0.236354	-0.692429	0.876352	0.979893
GO_LIPID_OXIDATION	85	-0.188563	-0.688662	0.949351	0.982751
GO_RESPONSE_TO_STARVATION	154	-0.172476	-0.685794	0.975177	0.984721
GO_REGULATION_OF_INTRACELLULAR_ESTROGEN_RECEPTOR_SIGNALING_PATHWAY	31	-0.224148	-0.68569	0.898279	0.984297
GO_EMBRYONIC_MORPHOGENESIS	417	-0.157905	-0.684119	0.997917	0.985152
GO_INORGANIC_ANION_TRANSMEMBRANE_TRANSPORT	63	-0.19368	-0.683744	0.926389	0.984964
GO_POSITIVE_REGULATION_OF_MRNA_PROCESSING	27	-0.226433	-0.680683	0.895706	0.986938
GO_PROTEIN_ADP_RIBOSYLATION	25	-0.23166	-0.680371	0.900787	0.9867
GO_RESPONSE_TO_EPIDERMAL_GROWTH_FACTOR	44	-0.210035	-0.678627	0.899425	0.987607
GO_ACTIVATED_T_CELL_PROLIFERATION	26	-0.222472	-0.678612	0.894172	0.987119
GO_ACETYL_COA_BIOSYNTHETIC_PROCESS_FROM_PYRUVATE	15	-0.262802	-0.675653	0.868204	0.988941
GO_CELLULAR_RESPONSE_TO_HYDROGEN_PEROXIDE	80	-0.184455	-0.675478	0.95739	0.988578
GO_REGULATION_OF_TORC1_SIGNALING	25	-0.231313	-0.675261	0.900482	0.988254
GO_PEROXISOME_ORGANIZATION	67	-0.190079	-0.6745	0.944	0.988341
GO_INNER_MITOCHONDRIAL_MEMBRANE_ORGANIZATION	27	-0.222834	-0.67355	0.910581	0.988603
GO_PROTEIN_O_LINKED_GLYCOSYLATION	73	-0.187809	-0.671637	0.96466	0.989542
GO_TRNA_PROCESSING	118	-0.174255	-0.670139	0.967213	0.99014
GO_REGULATION_OF_MUSCLE_HYPERTROPHY	48	-0.198284	-0.669093	0.944444	0.990409
GO_NEUROTROPHIN_SIGNALING_PATHWAY	32	-0.217328	-0.667558	0.927245	0.991034
GO_EMBRYONIC_DIGESTIVE_TRACT_DEVELOPMENT	25	-0.227651	-0.66724	0.883436	0.990757
GO_MICROTUBULE_ORGANIZING_CENTER_ORGANIZATION	121	-0.172593	-0.666923	0.980075	0.990485
GO_SECONDARY_METABOLIC_PROCESS	31	-0.214878	-0.666671	0.910606	0.990163
GO_NEGATIVE_REGULATION_OF_RESPONSE_TO_DNA_DAMAGE_STIMULUS	66	-0.187805	-0.665781	0.93956	0.99031
GO_PROTEIN_METHYLATION	148	-0.16555	-0.665722	0.981971	0.989858
GO_METHYLATION	289	-0.156769	-0.665421	0.997802	0.989574
GO_REGULATION_OF_EPITHELIAL_TO_MESENCHYMAL_TRANSITION	70	-0.186324	-0.664684	0.945205	0.989619
GO_REGULATION_OF_MITOCHONDRIAL_TRANSLATION	25	-0.224288	-0.663428	0.890093	0.990013
GO_NEGATIVE_REGULATION_OF_APOPTOTIC_SIGNALING_PATHWAY	187	-0.162077	-0.662938	0.994286	0.989834
GO_POSITIVE_REGULATION_OF_CELL_MIGRATION_INVOLVED_IN_SPROUTING_ANGIOGENESIS	22	-0.234565	-0.661567	0.901431	0.990312
GO_NEGATIVE_REGULATION_OF_PROTEIN_MATURATION	19	-0.245	-0.659843	0.888707	0.990975
GO_CELLULAR_RESPONSE_TO_ALKALOID	22	-0.234703	-0.659713	0.900482	0.990571
GO_PROTEIN_LOCALIZATION_TO_CILIUM	38	-0.205128	-0.656929	0.939883	0.991907
GO_PREASSEMBLY_OF_GPI_ANCHOR_IN_ER_MEMBRANE	16	-0.250073	-0.655501	0.880416	0.992352
[truncated: 1,463 more rows]
